# Supplementary material for: TTCA: an R package for the identification of differentially expressed genes in time course microarray data
Source: BMC Bioinformatics. 2017 Jan 14;18:33. doi: 10.1186/s12859-016-1440-8 (PMC5237546; doi:10.1186/s12859-016-1440-8)
Supplement: Additional file 3 — The complete result table is given in Table S4. (XLSX 816 kb) [file 12859_2016_1440_MOESM3_ESM.xlsx]

## Sheet: RESULT_EGF-vs-BControl_all
Start time: (2016-05-09 18:33:27) End Time: (2016-05-09 20:02:46) Systeminfo: (Windows >= 8 x64 build 9200 SYSBIOLO x86-64 Marco)
gene_name.x	ConsensusScore	RankMean	RankMedian	PubMed	Link	signifConsensus	SignPeak	SignPeakH0	SignInstability	SignDyn	signifearlyRes	signifmiddleRes	signiflateRes	signifResponse	PubMedscore	MaxDist	Instability	Dynamic	earlyResponse	middleResponse	lateResponse	completeResponse	Pval_MaxDist	Pval_Dynamic	Pval_earlyResponse	Pval_middleResponse	Pval_lateResponse	Pval_completeResponse	Pval_ConsensusScore	RankConsensus	RankMaxDist	RankDynamic	RankearlyResponse	RankmiddleResponse	RanklateResponse	RankcompleteResponse	probeset_id	gene_name.y	transkript_id	GO_BP	GO_CC	GO_mf
CTGF	1	130	24	73	CTGF	TRUE	TRUE	TRUE	FALSE	TRUE	TRUE	TRUE	FALSE	TRUE	0.487812	0.2583	0.00859984	17.402	0.147528	0.0266886	0.0107613	0.0248131	7.41611e-10	5.7215e-05	4.07826e-07	0.0150877	0.150104	0.00219132	3.57041e-05	1	2	24	1	236	856	76	17023646	CTGF	BC087839 / ENST00000367976 / NM_001901	cartilage condensation / ossification / angiogenesis / regulation of cell growth / positive regulation of protein phosphorylation / DNA replication / transcription initiation from RNA polymerase II promoter / cell-matrix adhesion / integrin-mediated signaling pathway / positive regulation of cell proliferation / fibroblast growth factor receptor signaling pathway / epidermis development / respons…	extracellular region/proteinaceous extracellular matrix/extracellular space/Golgi apparatus/cis-Golgi network/cytosol/plasma membrane/cell cortex/intracellular membrane-bounded organelle/perinuclear region of cytoplasm	fibronectin binding/integrin binding/insulin-like growth factor binding/growth factor activity/heparin binding/protein binding
EGR1	0.905926	152	10	101	EGR1	TRUE	TRUE	TRUE	FALSE	TRUE	TRUE	FALSE	TRUE	TRUE	0.524183	0.232327	0.00632243	10.2001	0.144408	0.0156991	0.0367798	0.0422353	3.2319e-09	0.0029053	4.87724e-07	0.113038	0.00030465	3.02372e-05	7.24555e-05	2	3	187	2	784	10	3	16989736	EGR1	ENST00000239938 / M62829 / NM_001964	negative regulation of transcription from RNA polymerase II promoter / response to amphetamine / transcription from RNA polymerase II promoter / learning or memory / circadian rhythm / response to glucose stimulus / cytokine-mediated signaling pathway / T cell differentiation / BMP signaling pathway / response to nutrient levels / cellular response to insulin stimulus / regulation of protein sumo…	nucleus/nucleoplasm/cytoplasm/intracellular	transcription regulatory region sequence-specific DNA binding/RNA polymerase II core promoter sequence-specific DNA binding/RNA polymerase II core promoter proximal region sequence-specific DNA binding transcription factor activity involved in positive regulation of transcription/DNA binding/double-stranded DNA binding/sequence-specific DNA binding transcription factor activity/protein binding/tr…
SNORA11	0.6228	504	57	0	SNORA11	TRUE	TRUE	TRUE	TRUE	FALSE	TRUE	TRUE	TRUE	TRUE	0	0.259823	0.0375082	1.49733	0.042888	0.0301925	0.0304107	0.0314141	6.82343e-10	0.883144	0.00175949	0.00834751	0.0011477	0.000383832	0.000817951	3	1	1431	57	146	35	19	17104049	MAGED2 / SNORA11	AK091003 / NR_002953	NA	NA	NA
PTGS2	0.585549	171	60	804	PTGS2	TRUE	TRUE	TRUE	FALSE	TRUE	TRUE	FALSE	TRUE	TRUE	0.758323	0.101821	0.00905655	11.2573	0.0728001	0.0119412	0.0276747	0.0288129	4.40048e-05	0.00153187	7.94932e-05	0.233333	0.00210271	0.000748013	0.00117214	4	27	144	8	961	60	29	16697370	PTGS2	AY151286 / ENST00000367468 / ENST00000466691 / ENST00000490885 / ENST00000559627 / ENST00000559800 / NM_000963	prostaglandin biosynthetic process / angiogenesis / prostaglandin metabolic process / cellular component movement / inflammatory response / response to oxidative stress / embryo implantation / learning / memory / regulation of blood pressure / negative regulation of cell proliferation / response to fructose stimulus / response to manganese ion / response to lithium ion / positive regulation vascu…	nucleus/cytoplasm/endoplasmic reticulum membrane/neuron projection/protein complex/endoplasmic reticulum/membrane/organelle membrane/intracellular membrane-bounded organelle/endoplasmic reticulum lumen	peroxidase activity/prostaglandin-endoperoxide synthase activity/lipid binding/enzyme binding/heme binding/protein homodimerization activity/metal ion binding/arachidonate 15-lipoxygenase activity/oxidoreductase activity/oxidoreductase activity, acting on single donors with incorporation of molecular oxygen, incorporation of two atoms of oxygen/dioxygenase activity/protein binding
JUN	0.577052	324	251	6789	JUN	TRUE	TRUE	TRUE	FALSE	TRUE	TRUE	FALSE	FALSE	FALSE	1	0.110304	0.00475012	8.96449	0.049875	0.0151989	0.00536305	0.0107117	2.02938e-05	0.00634207	0.000782636	0.124463	0.588203	0.153803	0.00127442	5	22	251	32	811	1256	1050	16687875	JUN	BC068522 / ENST00000371222 / NM_002228	angiogenesis / microglial cell activation / release of cytochrome c from mitochondria / liver development / positive regulation of endothelial cell proliferation / toll-like receptor signaling pathway / MyD88-dependent toll-like receptor signaling pathway / MyD88-independent toll-like receptor signaling pathway / outflow tract morphogenesis / transforming growth factor beta receptor signaling pat…	nuclear chromosome/nucleoplasm/transcription factor complex/nuclear euchromatin/cytosol/transcriptional repressor complex/nucleus	RNA polymerase II distal enhancer sequence-specific DNA binding/RNA polymerase II core promoter proximal region sequence-specific DNA binding transcription factor activity involved in positive regulation of transcription/RNA polymerase II activating transcription factor binding/RNA polymerase II transcription factor binding transcription factor activity involved in positive regulation of transcri…
GLIPR1	0.574924	43	15	0	GLIPR1	TRUE	TRUE	TRUE	FALSE	TRUE	TRUE	TRUE	TRUE	TRUE	0	0.129203	0.00601974	12.8717	0.108238	0.0562664	0.0294619	0.040494	4.00215e-06	0.000603763	4.8396e-06	0.000197458	0.00141219	4.44716e-05	0.00130153	6	15	99	3	3	43	5	16754373	GLIPR1	AK304847 / ENST00000266659 / ENST00000536703 / NM_006851	cellular lipid metabolic process / small molecule metabolic process	extracellular region/plasma membrane/integral to membrane/membrane	NA
FOS	0.554061	375	505	920	FOS	TRUE	TRUE	TRUE	FALSE	TRUE	TRUE	FALSE	FALSE	TRUE	0.77358	0.13593	0.00238401	6.03235	0.0538678	0.00871463	0.0145615	0.0168626	2.31481e-06	0.0467533	0.000506176	0.426609	0.0537249	0.0223726	0.00160315	7	11	505	23	1145	658	414	16786587	FOS	BC004490 / ENST00000303562 / NM_005252	conditioned taste aversion / toll-like receptor signaling pathway / MyD88-dependent toll-like receptor signaling pathway / MyD88-independent toll-like receptor signaling pathway / DNA methylation / regulation of transcription from RNA polymerase II promoter / transcription from RNA polymerase II promoter / inflammatory response / transforming growth factor beta receptor signaling pathway / nervou…	nucleus/nucleoplasm/transcription factor complex/nucleolus/endoplasmic reticulum/cytosol/membrane/neuron projection/cytoplasm	double-stranded DNA binding/sequence-specific DNA binding transcription factor activity/protein binding/transcription factor binding/sequence-specific DNA binding/transcription regulatory region DNA binding/R-SMAD binding/DNA binding
AREG	0.527039	272	161	549	AREG	TRUE	TRUE	TRUE	FALSE	TRUE	TRUE	FALSE	FALSE	TRUE	0.71515	0.0983293	0.00631111	10.8385	0.072177	0.00878571	0.0132182	0.0173927	6.10636e-05	0.00196801	8.40804e-05	0.421204	0.0771136	0.0190178	0.00211211	8	31	161	9	1137	726	369	16967863	AREG / AREGB	BC009799 / ENST00000264487 / ENST00000395748 / NM_001657	epidermal growth factor receptor signaling pathway / G-protein coupled receptor signaling pathway / cell-cell signaling / cell proliferation / positive regulation of DNA replication	extracellular space/cell surface/membrane/integral to membrane	cytokine activity/protein binding/growth factor activity
CYR61	0.490365	224	219	15	CYR61	TRUE	TRUE	TRUE	FALSE	TRUE	TRUE	TRUE	FALSE	TRUE	0.314238	0.143194	0.0040098	9.33332	0.0466178	0.0271402	0.00799279	0.0144028	1.30249e-06	0.00500474	0.00113269	0.0139599	0.313497	0.0480782	0.00310445	9	9	230	41	219	1040	719	16666738	CYR61	BC009199 / ENST00000451137 / ENST00000480413 / NM_001554	regulation of cell growth / osteoblast differentiation / positive regulation of protein phosphorylation / intussusceptive angiogenesis / atrioventricular valve morphogenesis / apoptotic process involved in heart morphogenesis / ventricular septum development / chemotaxis / cell proliferation / anatomical structure morphogenesis / positive regulation of phospholipase activity / positive regulation…	extracellular region	integrin binding/insulin-like growth factor binding/heparin binding/extracellular matrix binding/growth factor binding/protein binding
CLDN1	0.465478	165	97	17	CLDN1	TRUE	TRUE	TRUE	FALSE	TRUE	TRUE	TRUE	TRUE	TRUE	0.327587	0.100332	0.00889426	9.11479	0.0840139	0.0330117	0.0155349	0.0241543	5.05729e-05	0.00575635	3.0335e-05	0.00527662	0.0414508	0.00263131	0.00406242	10	28	241	4	97	573	84	16962661	CLDN1	AF101051 / ENST00000295522 / ENST00000490800 / NM_021101	cell adhesion / calcium-independent cell-cell adhesion / virus-host interaction / cell-cell junction organization	integral to plasma membrane/tight junction/integral to membrane/apical plasma membrane/lateral plasma membrane/plasma membrane/membrane/cell junction	structural molecule activity/identical protein binding/protein binding
DUSP1	0.462298	411	364	38	DUSP1	TRUE	TRUE	TRUE	FALSE	TRUE	TRUE	FALSE	FALSE	FALSE	0.415219	0.137241	0.00727732	7.09082	0.0640037	0.00817775	0.00386947	0.0095987	2.0841e-06	0.0222196	0.000180539	0.469156	0.779695	0.217037	0.00420639	11	10	364	11	1186	1376	1143	17002846	DUSP1	BC022463 / ENST00000239223 / NM_004417	inactivation of MAPK activity / endoderm formation / protein dephosphorylation / response to oxidative stress / cell cycle / response to light stimulus / response to estradiol stimulus / response to retinoic acid / cellular response to hormone stimulus / response to testosterone stimulus / intracellular signal transduction / response to hydrogen peroxide / regulation of apoptotic process / positi…	nucleoplasm/nucleus	non-membrane spanning protein tyrosine phosphatase activity/protein binding/protein tyrosine/threonine phosphatase activity/MAP kinase tyrosine/serine/threonine phosphatase activity/phosphoprotein phosphatase activity/protein tyrosine phosphatase activity/protein tyrosine/serine/threonine phosphatase activity/hydrolase activity/phosphatase activity
HBEGF	0.452578	413	462	880	HBEGF	TRUE	TRUE	TRUE	FALSE	TRUE	TRUE	FALSE	FALSE	FALSE	0.768548	0.098936	0.00834879	6.28294	0.0452868	0.0145066	0.00431072	0.00942471	5.76625e-05	0.0391231	0.00132258	0.142249	0.723543	0.228869	0.00468199	12	29	462	46	848	1349	1161	17000724	HBEGF	BC033097 / ENST00000230990 / ENST00000482211 / ENST00000498452 / ENST00000507104 / NM_001945	signal transduction / epidermal growth factor receptor signaling pathway / muscle organ development / regulation of heart contraction / fibroblast growth factor receptor signaling pathway / positive regulation of cell growth / positive regulation of cell migration / wound healing, spreading of epidermal cells / innate immune response / neurotrophin TRK receptor signaling pathway / phosphatidylino…	extracellular region/extracellular space/integral to plasma membrane/cell surface/plasma membrane/membrane/integral to membrane	epidermal growth factor receptor binding/growth factor activity/heparin binding/protein binding/eukaryotic cell surface binding
MIR4320	0.441974	445	9	0	MIR4320	TRUE	TRUE	TRUE	FALSE	FALSE	TRUE	TRUE	TRUE	TRUE	0	0.148904	0.016129	2.10031	0.0257186	0.0697451	0.0376427	0.0419995	8.38206e-07	0.689469	0.0179174	4.01344e-05	0.000256644	3.18442e-05	0.00526842	13	6	1235	274	1	9	4	16855244	MIR4320	hsa-mir-4320 / NR_036204	NA	NA	NA
CEACAM6	0.441496	240	56	3	CEACAM6	TRUE	TRUE	TRUE	FALSE	TRUE	FALSE	TRUE	TRUE	TRUE	0.157119	0.0428574	0.00851081	24.4755	0.0150028	0.036398	0.0432476	0.0397522	0.0258036	2.56009e-06	0.105229	0.00310172	8.79648e-05	5.25466e-05	0.00529664	14	446	6	747	56	3	6	16862563	CEACAM6	BC005008 / ENST00000199764 / NM_002483	signal transduction / cell-cell signaling / biological_process	plasma membrane/integral to plasma membrane/anchored to membrane/membrane/cellular_component	protein binding/molecular_function
F3	0.437065	300	298	65	F3	TRUE	TRUE	TRUE	FALSE	TRUE	TRUE	FALSE	FALSE	TRUE	0.474845	0.0988408	0.0110002	7.9879	0.0717659	0.0107969	0.0139191	0.0182193	5.81829e-05	0.0120631	8.72642e-05	0.290253	0.0638335	0.0147914	0.00556657	15	30	298	10	1019	685	311	16689869	F3	BC011029 / ENST00000334047 / ENST00000370207 / ENST00000478217 / ENST00000480356 / NM_001178096 / NM_001993	positive regulation of endothelial cell proliferation / activation of plasma proteins involved in acute inflammatory response / activation of blood coagulation via clotting cascade / activation of cysteine-type endopeptidase activity involved in apoptotic process / blood coagulation / blood coagulation, extrinsic pathway / positive regulation of platelet-derived growth factor receptor signaling p…	extracellular space/plasma membrane/cell surface/integral to membrane/extracellular matrix/intrinsic to external side of plasma membrane/extracellular region/membrane	protease binding/protein binding/phospholipid binding/cell surface binding
CD274	0.430633	239	245	19	CD274	TRUE	TRUE	TRUE	FALSE	TRUE	TRUE	TRUE	FALSE	TRUE	0.339529	0.109284	0.0065911	8.67131	0.0600319	0.02643	0.00829365	0.0156279	2.22379e-05	0.00767368	0.0002672	0.0157767	0.289994	0.032777	0.00598528	16	23	268	17	245	1020	552	17083357	CD274	AF233516 / ENST00000381573 / ENST00000381577 / ENST00000474218 / ENST00000492923 / ENST00000498261 / NM_001267706 / NM_014143 / NR_052005	immune response / signal transduction / cell surface receptor signaling pathway / T cell costimulation / positive regulation of T cell proliferation / negative regulation of T cell proliferation / positive regulation of interleukin-10 secretion	plasma membrane/external side of plasma membrane/endomembrane system/integral to membrane/extracellular vesicular exosome/membrane	protein binding
TMPRSS11E	0.427458	170	9	0	TMPRSS11E	TRUE	TRUE	TRUE	FALSE	TRUE	FALSE	TRUE	TRUE	TRUE	0	0.0551415	0.00412872	20.7218	0.0107776	0.0485668	0.0570327	0.0517672	0.00584075	1.23717e-05	0.227818	0.000537521	8.27146e-06	4.17781e-06	0.00620448	17	184	9	939	7	1	1	16967327	TMPRSS11E	AK292787 / ENST00000305363 / ENST00000510647 / NM_014058	proteolysis	extracellular region/integral to plasma membrane/plasma membrane/membrane/integral to membrane	serine-type endopeptidase activity/serine-type peptidase activity/catalytic activity/peptidase activity/hydrolase activity/protein binding
MCM2	0.420337	707	1011	7	MCM2	TRUE	FALSE	FALSE	FALSE	TRUE	FALSE	FALSE	TRUE	TRUE	0.235679	0.0243922	0.00186659	33.2933	0.00576783	0.0108962	0.0198831	0.017209	0.25463	1.03421e-07	0.567039	0.284842	0.0134646	0.020117	0.00672857	18	1277	1	1262	1011	257	382	16945101	MCM2	AK304204 / ENST00000265056 / ENST00000468414 / ENST00000473785 / ENST00000474964 / ENST00000477668 / NM_004526 / NR_073375	G1/S transition of mitotic cell cycle / mitotic cell cycle / DNA replication / DNA unwinding involved in replication / DNA replication initiation / DNA strand elongation involved in DNA replication / nucleosome assembly / cell cycle / cell cycle checkpoint / S phase of mitotic cell cycle / M/G1 transition of mitotic cell cycle / photosynthesis / chlorophyll biosynthetic process / cellular respons…	chromatin/nucleus/nucleoplasm/nuclear origin of replication recognition complex/MCM complex	DNA binding/DNA helicase activity/DNA replication origin binding/protein binding/ATP binding/histone binding/metal ion binding/helicase activity/ATPase activity/magnesium chelatase activity/nucleotide binding/hydrolase activity
IL8	0.414158	494	665	43	IL8	TRUE	TRUE	TRUE	FALSE	FALSE	TRUE	FALSE	FALSE	FALSE	0.428891	0.133791	0.0184124	4.34348	0.0476479	0.00440326	0.00917345	0.0115846	2.75065e-06	0.15838	0.00100625	0.82265	0.230025	0.116949	0.00722239	19	12	665	37	1419	958	976	16967771	IL8	ENST00000307407 / ENST00000483500 / M26383 / NM_000584	angiogenesis / response to molecule of bacterial origin / cellular component movement / inflammatory response / immune response / activation of signaling protein activity involved in unfolded protein response / cell cycle arrest / signal transduction / G-protein coupled receptor signaling pathway / negative regulation of cell proliferation / calcium-mediated signaling / regulation of cell adhesio…	extracellular region/extracellular space	interleukin-8 receptor binding/protein binding/chemokine activity/cytokine activity
EGR2	0.409084	293	255	7	EGR2	TRUE	TRUE	TRUE	FALSE	TRUE	TRUE	FALSE	TRUE	TRUE	0.235679	0.124826	0.00473139	6.9229	0.056156	0.00852775	0.0199574	0.021069	5.7622e-06	0.0249631	0.000397481	0.441076	0.0132153	0.00634391	0.00765745	20	16	381	21	1167	255	166	16714776	EGR2	BC035625 / ENST00000242480 / ENST00000411732 / ENST00000439032 / ENST00000493899 / NM_000399 / NM_001136177 / NM_001136178 / NM_001136179	transcription from RNA polymerase II promoter / protein export from nucleus / brain development / peripheral nervous system development / learning or memory / rhythmic behavior / motor neuron axon guidance / Schwann cell differentiation / protein sumoylation / facial nerve structural organization / rhombomere 3 formation / rhombomere 5 formation / regulation of ossification / response to insulin …	nucleus/cytoplasm/intracellular	RNA polymerase II activating transcription factor binding/chromatin binding/sequence-specific DNA binding transcription factor activity/protein binding/zinc ion binding/ligase activity/ubiquitin protein ligase binding/transcription regulatory region DNA binding/HMG box domain binding/nucleic acid binding/DNA binding/metal ion binding
PCNA	0.397113	654	1070	583	PCNA	TRUE	TRUE	FALSE	FALSE	TRUE	FALSE	FALSE	TRUE	TRUE	0.721949	0.0310288	0.00296051	17.5498	0.00577821	0.00751999	0.024389	0.0200266	0.11328	5.32756e-05	0.566044	0.525272	0.00448853	0.00861475	0.00880094	21	1070	23	1260	1232	114	213	16916958	PCNA	BC062439 / ENST00000379143 / ENST00000379160 / NM_002592 / NM_182649	G1/S transition of mitotic cell cycle / regulation of transcription involved in G1/S phase of mitotic cell cycle / mitotic cell cycle / telomere maintenance via recombination / telomere maintenance / DNA replication / DNA strand elongation involved in DNA replication / regulation of DNA replication / DNA repair / transcription-coupled nucleotide-excision repair / base-excision repair / nucleotide…	nucleus/nucleoplasm/DNA replication factor C complex/nucleolus/cytoplasm/microtubule cytoskeleton/nuclear replication fork/PCNA complex/PCNA-p21 complex/checkpoint clamp complex	purine-specific mismatch base pair DNA N-glycosylase activity/protein binding/DNA polymerase processivity factor activity/receptor tyrosine kinase binding/dinucleotide insertion or deletion binding/MutLalpha complex binding/identical protein binding/DNA binding
MKI67	0.383704	712	1048	724	MKI67	TRUE	TRUE	FALSE	FALSE	TRUE	FALSE	FALSE	FALSE	FALSE	0.74646	0.031634	0.00250374	17.5604	0.00492981	0.00813294	0.0137858	0.0121057	0.105039	5.30046e-05	0.650671	0.472842	0.0661659	0.0992278	0.0103065	22	1048	22	1317	1187	695	935	16719515	MKI67	ENST00000368653 / ENST00000368654 / ENST00000478293 / ENST00000484853 / NM_001145966 / NM_002417 / X65550	meiosis / cell proliferation / DNA metabolic process / organ regeneration / cellular response to heat / cell cycle	chromosome, centromeric region/condensed chromosome/nucleus/nucleolus/cytoplasm/intracellular/nuclear part/chromosome	protein binding/ATP binding/protein C-terminus binding/nucleotide binding
EDN1	0.379023	407	299	4	EDN1	TRUE	TRUE	TRUE	FALSE	TRUE	TRUE	FALSE	FALSE	FALSE	0.18241	0.133642	0.0050381	7.95628	0.0475276	0.00401631	0.00539098	0.00867325	2.78398e-06	0.0123216	0.00102019	0.856829	0.584706	0.286882	0.0108961	23	13	299	38	1431	1254	1244	17004903	EDN1	BC009720 / ENST00000379375 / NM_001168319 / NM_001955	negative regulation of transcription from RNA polymerase II promoter / prostaglandin biosynthetic process / patterning of blood vessels / response to hypoxia / in utero embryonic development / histamine secretion / regulation of systemic arterial blood pressure by endothelin / regulation of pH / cell surface receptor signaling pathway / G-protein coupled receptor signaling pathway / elevation of …	extracellular region/extracellular space/cytoplasm	cytokine activity/hormone activity/endothelin A receptor binding/endothelin B receptor binding/receptor binding/protein binding
EXO1	0.37204	697	964	2	EXO1	TRUE	FALSE	FALSE	FALSE	TRUE	FALSE	FALSE	TRUE	TRUE	0.124514	0.0226134	0.00132679	30.6745	0.00585376	0.0119311	0.0258756	0.021883	0.313069	2.52429e-07	0.558831	0.233788	0.00317114	0.0050108	0.0118451	24	1322	2	1254	964	87	142	16679411	EXO1	BC007491 / ENST00000348581 / ENST00000366548 / ENST00000450748 / ENST00000469419 / ENST00000493702 / ENST00000518483 / ENST00000518741 / ENST00000519225 / NM_003686 / NM_006027 / NM_130398	humoral immune response mediated by circulating immunoglobulin / DNA repair / mismatch repair / DNA recombination / meiosis / somatic hypermutation of immunoglobulin genes / isotype switching / response to DNA damage stimulus / nucleic acid phosphodiester bond hydrolysis	nucleus	DNA binding/ribonuclease H activity/exonuclease activity/protein binding/5'-3' exonuclease activity/5'-3' exodeoxyribonuclease activity/structure-specific DNA binding/single-stranded DNA specific 5'-3' exodeoxyribonuclease activity/metal ion binding/flap endonuclease activity/double-stranded DNA specific 5'-3' exodeoxyribonuclease activity/catalytic activity/nuclease activity/endonuclease activit…
SNAI2	0.370003	190	103	10	SNAI2	TRUE	TRUE	TRUE	FALSE	TRUE	TRUE	TRUE	FALSE	TRUE	0.271771	0.0752597	0.00461715	12.7458	0.0459428	0.0226162	0.013355	0.0176142	0.0006156	0.000647987	0.00122494	0.0309772	0.0743163	0.017775	0.0121384	25	70	103	44	428	719	346	17077004	SNAI2	BC014890 / ENST00000020945 / ENST00000396822 / NM_003068	negative regulation of transcription from RNA polymerase II promoter / osteoblast differentiation / epithelial to mesenchymal transition / epithelial to mesenchymal transition involved in endocardial cushion formation / cell migration involved in endocardial cushion formation / negative regulation of cell adhesion involved in substrate-bound cell migration / Notch signaling pathway / sensory perc…	nuclear chromatin/nucleus/cytoplasm/intracellular	RNA polymerase II core promoter proximal region sequence-specific DNA binding transcription factor activity involved in negative regulation of transcription/chromatin binding/RNA polymerase II distal enhancer sequence-specific DNA binding transcription factor activity/zinc ion binding/sequence-specific DNA binding/nucleic acid binding/DNA binding/metal ion binding/protein binding
SNX5	0.369828	689	1064	10	SNX5	TRUE	TRUE	FALSE	FALSE	TRUE	FALSE	FALSE	FALSE	FALSE	0.271771	0.0294434	0.00209266	27.8911	0.0179434	0.00983815	0.00747318	0.00873986	0.137954	6.87225e-07	0.0628997	0.347459	0.357931	0.281265	0.0121641	26	1127	5	663	1064	1080	1236	16917504	SNX5	AF121855 / AK054634 / AK123903 / AK296947 / AK308017 / AL832967 / BC000100 / BC093623 / BC093980 / BC143274 / BT007191 / ENST00000377759 / ENST00000377768 / ENST00000419004 / ENST00000431277 / ENST00000463050 / ENST00000469704 / ENST00000474883 / ENST00000475716 / ENST00000476648 / ENST00000481323 / ENST00000483485 / ENST00000484809 / ENST00000486039 / ENST00000490175 / ENST00000491090 / ENST0000…	pinocytosis / cell communication / protein transport / transport / endocytosis	ruffle/phagocytic cup/cytoplasmic vesicle membrane/extrinsic to internal side of plasma membrane/extrinsic to endosome membrane/early endosome membrane/macropinocytic cup/cytoplasm/endosome/plasma membrane/membrane/cytoplasmic vesicle/cell projection	phosphatidylinositol binding/protein binding/lipid binding
ENTPD3	0.368236	271	178	0	ENTPD3	TRUE	TRUE	TRUE	FALSE	TRUE	FALSE	TRUE	TRUE	TRUE	0	0.0557651	0.00315311	22.951	0.00516362	0.0205173	0.0398531	0.0337397	0.00542815	4.76818e-06	0.626756	0.0454739	0.000166795	0.000215616	0.0123994	27	178	7	1302	580	5	12	16939479	ENTPD3	AF039917 / ENST00000301825 / ENST00000456402 / NM_001248	nucleoside diphosphate catabolic process / nucleoside triphosphate catabolic process	plasma membrane/integral to membrane/membrane	ATP binding/nucleoside-diphosphatase activity/nucleoside-triphosphatase activity/nucleotide binding/hydrolase activity
SNORA38B	0.367872	747	1132	0	SNORA38B	TRUE	TRUE	TRUE	FALSE	FALSE	TRUE	FALSE	FALSE	FALSE	0	0.182667	0.0162007	1.2952	0.0408664	0.00870117	0.00682926	0.00997767	7.38443e-08	0.931801	0.00225237	0.427639	0.41995	0.193185	0.0124539	28	4	1457	64	1147	1132	1114	16837226	SNORA38B	NR_003706	NA	NA	NA
DUSP5	0.366423	321	73	4	DUSP5	TRUE	TRUE	TRUE	FALSE	FALSE	TRUE	TRUE	FALSE	TRUE	0.18241	0.0977157	0.012478	4.41052	0.0838586	0.0347854	0.0125859	0.0222252	6.47178e-05	0.150881	3.07252e-05	0.00398437	0.0915078	0.00454138	0.0126735	29	32	652	5	73	760	133	16709128	DUSP5	BC062545 / ENST00000369583 / ENST00000468749 / NM_004419	inactivation of MAPK activity / endoderm formation / protein dephosphorylation / peptidyl-tyrosine dephosphorylation / dephosphorylation	nucleoplasm/nucleus	protein tyrosine phosphatase activity/MAP kinase tyrosine/serine/threonine phosphatase activity/protein tyrosine/serine/threonine phosphatase activity/phosphatase activity/phosphoprotein phosphatase activity/hydrolase activity
SERPINE1	0.3582	241	83	17	SERPINE1	TRUE	TRUE	TRUE	FALSE	FALSE	TRUE	TRUE	TRUE	TRUE	0.327587	0.06372	0.00966238	5.29336	0.0504942	0.0538969	0.0261236	0.0327834	0.00217464	0.0795348	0.000730601	0.000266632	0.00299467	0.000272718	0.0140017	30	113	570	29	5	83	16	17049676	SERPINE1	BC010860 / ENST00000223095 / ENST00000445463 / NM_000602	chronological cell aging / angiogenesis / platelet degranulation / transcription, DNA-dependent / transcription initiation from RNA polymerase II promoter / transforming growth factor beta receptor signaling pathway / blood coagulation / gene expression / regulation of receptor activity / negative regulation of plasminogen activation / negative regulation of endopeptidase activity / negative regu…	extracellular region/extracellular space/plasma membrane/extracellular matrix/platelet alpha granule lumen	protease binding/serine-type endopeptidase inhibitor activity/receptor binding/protein binding/peptidase inhibitor activity
TNFAIP3	0.357915	236	144	1	TNFAIP3	TRUE	TRUE	TRUE	FALSE	TRUE	TRUE	TRUE	FALSE	FALSE	0.0785596	0.103289	0.00439093	9.72968	0.0584605	0.0302828	0.0055126	0.0140533	3.84054e-05	0.00389423	0.000313313	0.00822376	0.569584	0.0536621	0.0140504	31	25	213	18	144	1244	759	17012946	TNFAIP3	BC064689 / ENST00000237289 / ENST00000420009 / ENST00000421450 / ENST00000433680 / ENST00000485192 / NM_001270507 / NM_001270508 / NM_006290	B-1 B cell homeostasis / response to molecule of bacterial origin / regulation of germinal center formation / negative regulation of chronic inflammatory response / proteolysis / inflammatory response / protein deubiquitination / negative regulation of protein ubiquitination / negative regulation of NF-kappaB transcription factor activity / negative regulation of type I interferon production / re…	nucleus/cytoplasm/lysosome/centrosome/cytosol	protease binding/DNA binding/ubiquitin thiolesterase activity/ubiquitin-protein ligase activity/ubiquitin-specific protease activity/protein binding/zinc ion binding/kinase binding/cysteine-type endopeptidase inhibitor activity involved in apoptotic process/ubiquitin binding/protein self-association/catalytic activity/peptidase activity/cysteine-type peptidase activity/hydrolase activity/ligase a…
GBP2	0.354431	405	320	0	GBP2	TRUE	TRUE	TRUE	FALSE	TRUE	TRUE	FALSE	FALSE	FALSE	0	0.131749	0.00419329	7.68387	0.0730255	0.00757128	0.00334501	0.00985609	3.2475e-06	0.0148059	7.7902e-05	0.520747	0.842478	0.200559	0.0146604	32	14	320	7	1228	1410	1122	16689352	GBP2	AL832451 / ENST00000464839	GTP catabolic process / immune response / cytokine-mediated signaling pathway / interferon-gamma-mediated signaling pathway / type I interferon-mediated signaling pathway	Golgi membrane/nucleus/cytoplasm/Golgi apparatus/cytosol/membrane	nucleotide binding/GTPase activity/GTP binding
MCM3	0.353886	728	1065	2	MCM3	TRUE	FALSE	FALSE	FALSE	TRUE	FALSE	FALSE	TRUE	TRUE	0.124514	0.0218047	0.00167277	29.235	0.00352252	0.00983435	0.0284983	0.0233063	0.343088	4.20661e-07	0.798008	0.347704	0.00174815	0.00333853	0.0147584	33	1347	4	1384	1065	51	99	17020019	MCM3	BC003509 / ENST00000229854 / ENST00000419835 / ENST00000462365 / ENST00000476448 / ENST00000596288 / ENST00000596983 / NM_001270472 / NM_002388	G1/S transition of mitotic cell cycle / mitotic cell cycle / DNA replication / DNA replication initiation / DNA strand elongation involved in DNA replication / cell cycle / DNA duplex unwinding / cell cycle checkpoint / S phase of mitotic cell cycle / M/G1 transition of mitotic cell cycle / photosynthesis / chlorophyll biosynthetic process	nucleus/nucleoplasm/alpha DNA polymerase:primase complex/nucleolus/centrosome/MCM complex/intracellular membrane-bounded organelle/perinuclear region of cytoplasm/cytoplasm	DNA binding/DNA helicase activity/protein binding/ATP binding/nucleotide binding/helicase activity/hydrolase activity/nucleoside-triphosphatase activity/magnesium chelatase activity
NR4A3	0.350585	396	314	4	NR4A3	TRUE	TRUE	TRUE	FALSE	TRUE	TRUE	FALSE	FALSE	FALSE	0.18241	0.105531	0.00901919	7.77848	0.0739179	0.00639948	0.00572207	0.011518	3.12539e-05	0.0138881	7.19346e-05	0.629422	0.54397	0.119429	0.0153673	34	24	314	6	1308	1234	983	17087517	NR4A3	D78579 / ENST00000330847 / ENST00000338488 / ENST00000395097 / NM_006981 / NM_173199 / NM_173200	mesoderm formation / transcription initiation from RNA polymerase II promoter / axon guidance / gene expression / hippocampus development / adult behavior / organ regeneration / cellular response to stress / response to peptide hormone stimulus / negative regulation of neuron apoptotic process / positive regulation of cell cycle / semicircular canal morphogenesis / neuromuscular process controlli…	nucleus/nucleoplasm/transcription factor complex	RNA polymerase II core promoter proximal region sequence-specific DNA binding transcription factor activity involved in positive regulation of transcription/DNA binding/steroid hormone receptor activity/thyroid hormone receptor activity/zinc ion binding/sequence-specific DNA binding/sequence-specific DNA binding transcription factor activity/ligand-activated sequence-specific DNA binding RNA poly…
SCARNA4	0.349328	531	103	0	SCARNA4	TRUE	TRUE	TRUE	TRUE	FALSE	TRUE	TRUE	TRUE	TRUE	0	0.145801	0.0390858	1.14746	0.0373382	0.0290686	0.0248971	0.0266291	1.06377e-06	0.958948	0.00351851	0.0100657	0.00398273	0.00133499	0.0156063	35	8	1468	84	167	103	48	16694359	SCARNA4	NR_003005	NA	NA	NA
MYC	0.344164	498	647	984	MYC	TRUE	TRUE	TRUE	FALSE	TRUE	FALSE	FALSE	FALSE	FALSE	0.781195	0.0574107	0.00227048	6.9072	0.00543293	0.0195454	0.00991802	0.0111488	0.00447882	0.0252372	0.599731	0.0544758	0.18848	0.134125	0.0166314	36	165	383	1282	647	911	1017	17072669	MYC	ENST00000377970 / NM_002467 / V00568	negative regulation of transcription from RNA polymerase II promoter / MAPK cascade / branching involved in ureteric bud morphogenesis / positive regulation of mesenchymal cell proliferation / energy reserve metabolic process / chromatin remodeling / transcription, DNA-dependent / transcription initiation from RNA polymerase II promoter / cellular iron ion homeostasis / response to DNA damage sti…	nucleus/nucleoplasm/nucleolus/spindle/protein complex/nuclear envelope/rough endoplasmic reticulum/nucleoplasmic reticulum	DNA binding/sequence-specific DNA binding transcription factor activity/protein binding/transcription factor binding/protein complex binding/protein dimerization activity/repressing transcription factor binding/E-box binding/mRNA binding/eukaryotic initiation factor eIF2 binding
ROS1	0.343355	484	346	84	ROS1	TRUE	FALSE	FALSE	FALSE	TRUE	TRUE	FALSE	TRUE	TRUE	0.503519	0.0337491	0.00484465	14.4476	0.0237972	0.0133364	0.0254902	0.0233235	0.0805958	0.000255598	0.0241024	0.178332	0.00346763	0.0033224	0.0167984	37	938	65	346	906	93	98	17022996	GOPC / ROS1	ENST00000368507 / ENST00000368508 / ENST00000403284 / ENST00000467125 / M34353 / NM_002944	columnar/cuboidal epithelial cell development / protein phosphorylation / transmembrane receptor protein tyrosine kinase signaling pathway / spermatogenesis / cell proliferation / negative regulation of gene expression / regulation of phosphate transport / cell growth / cell differentiation / regulation of TOR signaling cascade / regulation of ERK1 and ERK2 cascade / phosphorylation / intracellul…	plasma membrane/membrane/integral to membrane/cytoplasm/cytoskeleton/extrinsic to membrane/Golgi membrane/Golgi apparatus/postsynaptic density/cell junction/trans-Golgi network transport vesicle/protein complex/postsynaptic membrane/dendrite/cell projection/synapse	protein tyrosine kinase activity/transmembrane receptor protein tyrosine kinase activity/ATP binding/protein phosphatase binding/protein binding/protein kinase activity/transferase activity, transferring phosphorus-containing groups/nucleotide binding/kinase activity/transferase activity/MHC class II protein binding/cytoskeletal protein binding/small GTPase regulator activity/frizzled binding/pro…
HIF1A	0.343228	551	875	185	HIF1A	TRUE	TRUE	TRUE	FALSE	FALSE	TRUE	FALSE	FALSE	FALSE	0.592273	0.081827	0.00650265	3.19012	0.0526747	0.0124714	0.00602842	0.0109894	0.000310235	0.357207	0.000575473	0.210719	0.507625	0.141001	0.0168248	38	56	875	25	940	1197	1028	16785083	HIF1A	ENST00000554177	angiogenesis / response to hypoxia / neural crest cell migration / epithelial to mesenchymal transition / embryonic placenta development / B-1 B cell homeostasis / positive regulation of endothelial cell proliferation / heart looping / positive regulation of neuroblast proliferation / connective tissue replacement involved in inflammatory response wound healing / outflow tract morphogenesis / car…	nucleus/nucleoplasm/transcription factor complex/nucleolus/cytoplasm/cytosol/motile cilium	protein binding transcription factor activity/RNA polymerase II core promoter proximal region sequence-specific DNA binding transcription factor activity involved in positive regulation of transcription/sequence-specific DNA binding transcription factor activity/RNA polymerase II distal enhancer sequence-specific DNA binding transcription factor activity/signal transducer activity/protein binding…
GBP1	0.340539	348	349	6	GBP1	TRUE	TRUE	TRUE	FALSE	TRUE	TRUE	FALSE	FALSE	FALSE	0.220545	0.11232	0.00675205	7.29647	0.0351747	0.0102108	0.0104131	0.0124428	1.69573e-05	0.0192839	0.00467259	0.324128	0.164931	0.0892043	0.0173943	39	20	349	103	1045	878	908	16689332	GBP1	AB208912 / ENST00000370473 / ENST00000459831 / ENST00000484970 / NM_002053	cytokine-mediated signaling pathway / defense response to virus / interferon-gamma-mediated signaling pathway / GTP catabolic process	Golgi membrane/extracellular region/cytosol/cytoplasm/Golgi apparatus/membrane	GTPase activity/GTP binding/nucleotide binding/identical protein binding
THBS1	0.340049	370	285	90	THBS1	TRUE	TRUE	TRUE	FALSE	TRUE	TRUE	FALSE	FALSE	FALSE	0.511249	0.0709635	0.00747362	8.09432	0.0430805	0.0130079	0.00567017	0.0100106	0.000976159	0.0112342	0.00171913	0.190014	0.550262	0.191229	0.0175004	40	86	285	56	921	1238	1111	16799315	THBS1	AK291639 / AK293230 / AK304754 / AK310820 / BC136469 / BC136470 / ENST00000260356 / ENST00000478845 / ENST00000484734 / ENST00000490247 / ENST00000497720 / ENST00000560894 / GENSCAN00000008273 / NM_003246 / OTTHUMT00000257831 / OTTHUMT00000257834 / OTTHUMT00000257836 / OTTHUMT00000257837 / OTTHUMT00000257838 / OTTHUMT00000418642 / uc001zkh.3 / uc010bbi.3	activation of MAPK activity / response to hypoxia / negative regulation of endothelial cell proliferation / negative regulation of cell-matrix adhesion / sprouting angiogenesis / chronic inflammatory response / platelet degranulation / negative regulation of antigen processing and presentation of peptide or polysaccharide antigen via MHC class II / negative regulation of dendritic cell antigen pr…	extracellular region/fibrinogen complex/extracellular space/external side of plasma membrane/cell surface/secretory granule/extracellular matrix/platelet alpha granule/platelet alpha granule lumen/extracellular vesicular exosome/endoplasmic reticulum/sarcoplasmic reticulum	phosphatidylserine binding/glycoprotein binding/fibronectin binding/integrin binding/calcium ion binding/protein binding/heparin binding/fibroblast growth factor binding/low-density lipoprotein particle binding/identical protein binding/laminin binding/proteoglycan binding/transforming growth factor beta binding/fibrinogen binding/collagen V binding/extracellular matrix binding/eukaryotic cell su…
NAMPT	0.339184	223	100	5	NAMPT	TRUE	TRUE	TRUE	FALSE	TRUE	TRUE	TRUE	FALSE	TRUE	0.203074	0.0908589	0.00689715	7.16458	0.0422062	0.0328322	0.0145854	0.0199282	0.000125385	0.0211162	0.00191102	0.00543052	0.0533833	0.00886904	0.0176893	41	38	359	59	100	656	218	17061545	NAMPT	ENST00000222553 / ENST00000424768 / ENST00000486949 / NM_005746 / OTTHUMT00000277146 / OTTHUMT00000316767 / OTTHUMT00000316771 / uc003vdq.3 / uc011klu.1	vitamin metabolic process / water-soluble vitamin metabolic process / nicotinamide metabolic process / signal transduction / cell-cell signaling / positive regulation of cell proliferation / insulin receptor signaling pathway / NAD biosynthetic process / NAD metabolic process / small molecule metabolic process / positive regulation of transcription from RNA polymerase II promoter / positive regul…	cytosol/cytoplasm	nicotinate-nucleotide diphosphorylase (carboxylating) activity/nicotinate phosphoribosyltransferase activity/cytokine activity/nicotinamide phosphoribosyltransferase activity/protein binding/transferase activity/transferase activity, transferring glycosyl groups
MIR554	0.336219	517	620	0	MIR554	TRUE	TRUE	TRUE	FALSE	FALSE	TRUE	FALSE	FALSE	FALSE	0	0.152154	0.00386696	4.74986	0.0485886	0.00610787	0.00322739	0.00748757	6.54934e-07	0.117964	0.000904228	0.657789	0.85564	0.403464	0.0183538	42	5	620	35	1323	1419	1343	16670918	MIR554	hsa-mir-554 / NR_030280	NA	NA	NA
DUSP6	0.330683	287	271	20	DUSP6	TRUE	TRUE	TRUE	FALSE	TRUE	TRUE	FALSE	TRUE	TRUE	0.345059	0.0683496	0.00375192	12.4764	0.0257572	0.00876616	0.0155319	0.0152564	0.00129881	0.000754607	0.0178126	0.422685	0.0414831	0.0368001	0.0196678	43	90	110	271	1140	574	609	16768297	DUSP6	BC005047 / ENST00000279488 / ENST00000308385 / ENST00000547140 / ENST00000548755 / NM_001946 / NM_022652	inactivation of MAPK activity / toll-like receptor signaling pathway / MyD88-dependent toll-like receptor signaling pathway / MyD88-independent toll-like receptor signaling pathway / dorsal/ventral pattern formation / response to organic cyclic compound / cell differentiation / toll-like receptor 2 signaling pathway / toll-like receptor 3 signaling pathway / toll-like receptor 4 signaling pathway…	nucleoplasm/cytoplasm/cytosol	protein tyrosine phosphatase activity/MAP kinase tyrosine/serine/threonine phosphatase activity/protein binding/phosphoprotein phosphatase activity/protein tyrosine/serine/threonine phosphatase activity/phosphatase activity/hydrolase activity
NAPSA	0.325258	264	243	2	NAPSA	TRUE	TRUE	TRUE	FALSE	TRUE	FALSE	FALSE	TRUE	TRUE	0.124514	0.0509491	0.00997827	16.1044	0.0126886	0.0180033	0.0418515	0.0354465	0.00961246	0.000108541	0.160024	0.072804	0.000114089	0.000142806	0.0210549	44	243	39	841	686	4	8	16874546	NAPSA	AF090386 / AF098484 / AF200345 / AK055569 / BC017842 / BC029397 / ENST00000253719 / ENST00000596653 / ENST00000597378 / ENST00000598044 / ENST00000598915 / ENST00000599181 / ENST00000599233 / GENSCAN00000017476 / NM_004851 / OTTHUMT00000464714 / OTTHUMT00000464715 / OTTHUMT00000464716 / OTTHUMT00000464717 / OTTHUMT00000464718 / OTTHUMT00000464719 / OTTHUMT00000464720 / OTTHUMT00000464721 / uc002p…	proteolysis / membrane protein proteolysis / surfactant homeostasis	extracellular space/lysosome/alveolar lamellar body/extracellular region	endopeptidase activity/aspartic-type endopeptidase activity/peptidase activity/hydrolase activity
IL24	0.323195	103	70	0	IL24	TRUE	TRUE	TRUE	FALSE	TRUE	TRUE	TRUE	TRUE	TRUE	0	0.0600408	0.00322808	11.6945	0.0569618	0.0420585	0.0269636	0.0319793	0.00330473	0.00118409	0.000365523	0.00133382	0.00247042	0.000333074	0.0216099	45	141	130	20	23	70	17	16676682	IL24	ENST00000294984 / ENST00000367093 / ENST00000367095 / ENST00000491169 / NM_001185156 / NM_001185157 / NM_001185158 / NM_006850 / U16261	apoptotic process / positive regulation of cell proliferation / negative regulation of cell proliferation / negative regulation of cell migration / serine phosphorylation of STAT3 protein / wound healing / positive regulation of tyrosine phosphorylation of Stat3 protein / cellular response to lipopolysaccharide / cellular response to interleukin-4 / positive regulation of apoptotic process	extracellular space/extracellular region/endoplasmic reticulum	cytokine activity
PTGER4	0.32183	338	457	14	PTGER4	TRUE	TRUE	TRUE	FALSE	TRUE	TRUE	TRUE	FALSE	TRUE	0.306924	0.089825	0.0031398	6.30375	0.037267	0.0200456	0.0107446	0.014505	0.000138801	0.0385505	0.00355107	0.049629	0.150784	0.0465596	0.0219855	46	39	457	85	612	857	706	16984287	PTGER4	ENST00000302472 / ENST00000513635 / ENST00000514343 / L28175 / NM_000958	immune response / adenylate cyclase-modulating G-protein coupled receptor signaling pathway / JNK cascade / response to mechanical stimulus / regulation of ossification / response to lipopolysaccharide / negative regulation of integrin activation / T-helper cell differentiation / negative regulation of cytokine secretion / positive regulation of cytokine secretion / negative regulation of inflamm…	plasma membrane/integral to membrane/membrane	prostaglandin E receptor activity/protein binding/G-protein coupled receptor activity/signal transducer activity/prostaglandin receptor activity
OTTHUMG00000171410	0.318848	339	355	0	OTTHUMG00000171410	TRUE	TRUE	TRUE	FALSE	TRUE	TRUE	FALSE	FALSE	TRUE	0	0.123554	0.0085171	7.24578	0.043144	0.00809872	0.013904	0.0153731	6.41394e-06	0.0199675	0.00170605	0.475671	0.0640946	0.0354847	0.0228317	47	17	355	55	1192	687	584	16788033	OTTHUMG00000171410 / RP11-404P21.5	ENST00000555383 / OTTHUMT00000413298	NA	NA	NA
OTTHUMG00000018491	0.31215	596	725	0	OTTHUMG00000018491	TRUE	TRUE	TRUE	FALSE	FALSE	FALSE	FALSE	TRUE	TRUE	0	0.146828	0.0100221	2.18168	0.0158324	0.0144684	0.0234968	0.0213534	9.82772e-07	0.661339	0.0908125	0.143302	0.00554869	0.00584036	0.0248633	48	7	1208	725	853	140	158	16706233	OTTHUMG00000018491 / RP11-417O11.5	ENST00000416076 / OTTHUMT00000048713	NA	NA	NA
TGFB2	0.312139	497	524	121	TGFB2	TRUE	TRUE	TRUE	FALSE	FALSE	TRUE	TRUE	TRUE	TRUE	0.544476	0.0379081	0.00834822	5.88601	0.0255452	0.0209229	0.0394244	0.0351842	0.0478256	0.0519073	0.0183969	0.0421943	0.000181168	0.000152048	0.0248668	49	690	524	282	547	6	9	16677556	TGFB2	ENST00000366929 / ENST00000366930 / ENST00000479322 / ENST00000488793 / M19154 / NM_001135599 / NM_003238	cell morphogenesis / cartilage condensation / angiogenesis / eye development / response to hypoxia / epithelial to mesenchymal transition / hair follicle development / blood vessel remodeling / platelet degranulation / heart morphogenesis / protein phosphorylation / induction of apoptosis / activation-induced cell death of T cells / cell cycle arrest / transforming growth factor beta receptor sig…	extracellular region/extracellular space/axon/extracellular matrix/platelet alpha granule lumen/neuronal cell body	beta-amyloid binding/receptor signaling protein serine/threonine kinase activity/receptor binding/type II transforming growth factor beta receptor binding/cytokine activity/transforming growth factor beta receptor binding/protein binding/growth factor activity/protein homodimerization activity/protein heterodimerization activity
HAS2	0.306554	338	220	39	HAS2	TRUE	TRUE	TRUE	FALSE	TRUE	TRUE	TRUE	FALSE	FALSE	0.418088	0.0521165	0.00464038	11.3845	0.0304263	0.0201236	0.00598012	0.0103746	0.00835914	0.00142072	0.00897157	0.0489148	0.51326	0.17084	0.0267111	50	220	138	159	604	1201	1081	17080648	HAS2	ENST00000303924 / NM_005328 / U54804	kidney development / positive regulation of cell proliferation / hyaluronan biosynthetic process / positive regulation of cell migration / positive regulation of urine volume / cellular response to platelet-derived growth factor stimulus / renal water absorption / cellular response to interleukin-1 / cellular response to tumor necrosis factor / cellular response to fluid shear stress / positive r…	integral to plasma membrane/membrane/integral to membrane	hyaluronan synthase activity/transferase activity, transferring hexosyl groups/transferase activity/transferase activity, transferring glycosyl groups
TGFB1	0.304803	733	564	887	TGFB1	TRUE	FALSE	FALSE	FALSE	FALSE	FALSE	TRUE	TRUE	TRUE	0.769445	0.0289468	0.00359955	5.34863	0.00789469	0.03219	0.0201737	0.0211532	0.146691	0.0764177	0.388804	0.00602189	0.0125174	0.00619031	0.0273189	51	1143	564	1119	113	243	163	16872551	TGFB1	AK291907 / ENST00000221930 / ENST00000597453 / ENST00000600196 / NM_000660	protein import into nucleus, translocation / negative regulation of transcription from RNA polymerase II promoter / MAPK cascade / ureteric bud development / response to hypoxia / epithelial to mesenchymal transition / negative regulation of protein phosphorylation / positive regulation of protein phosphorylation / regulation of sodium ion transport / chondrocyte differentiation / hematopoietic p…	extracellular region/proteinaceous extracellular matrix/extracellular space/nucleus/cytoplasm/Golgi lumen/microvillus/cell surface/axon/platelet alpha granule lumen/neuronal cell body/secretory granule/extracellular matrix	type II transforming growth factor beta receptor binding/protein binding/growth factor activity/enzyme binding/protein homodimerization activity/protein heterodimerization activity/protein N-terminus binding/transforming growth factor beta receptor binding/eukaryotic cell surface binding
JUNB	0.301559	372	330	54	JUNB	TRUE	TRUE	TRUE	FALSE	TRUE	TRUE	FALSE	FALSE	TRUE	0.454181	0.0517133	0.00847834	7.51303	0.0520969	0.0176139	0.00945286	0.0143667	0.00877168	0.0166285	0.00061272	0.0783841	0.213514	0.0486261	0.0284857	52	230	330	27	704	935	726	16858710	JUNB	BC004250 / ENST00000302754 / NM_002229	vasculogenesis / osteoblast differentiation / trophectodermal cell differentiation / transcription, DNA-dependent / regulation of transcription from RNA polymerase II promoter / transcription initiation from RNA polymerase II promoter / transforming growth factor beta receptor signaling pathway / response to light stimulus / response to mechanical stimulus / gene expression / osteoclast different…	chromatin/nucleus/nucleoplasm/nucleolus	RNA polymerase II regulatory region sequence-specific DNA binding/DNA binding/double-stranded DNA binding/sequence-specific DNA binding transcription factor activity/transcription coactivator activity/transcription corepressor activity/protein binding/sequence-specific DNA binding
MYBL2	0.297145	438	423	6	MYBL2	TRUE	TRUE	TRUE	FALSE	TRUE	FALSE	FALSE	TRUE	TRUE	0.220545	0.0434659	0.00572921	17.1043	0.00267243	0.00877724	0.0308691	0.0248374	0.023932	6.61202e-05	0.880676	0.421845	0.00103926	0.00217663	0.0301607	53	423	29	1417	1139	33	75	16913957	MYBL2	BC007585 / ENST00000217026 / ENST00000396863 / NM_002466	mitotic cell cycle / transcription, DNA-dependent / spindle assembly involved in mitosis / regulation of transcription, DNA-dependent	nucleus/Myb complex	DNA binding/chromatin binding/sequence-specific DNA binding transcription factor activity/protein binding
GINS4	0.296689	752	852	0	GINS4	TRUE	FALSE	FALSE	FALSE	TRUE	FALSE	FALSE	TRUE	TRUE	0	0.0160293	0.00133855	29.4817	0.0123757	0.00638249	0.0190942	0.0164157	0.617251	3.84983e-07	0.169491	0.631064	0.0164367	0.0256746	0.0303394	54	1433	3	852	1310	295	462	17068385	GINS4	BC005995 / ENST00000276533 / ENST00000518430 / ENST00000518671 / ENST00000520354 / ENST00000520631 / ENST00000520710 / ENST00000520736 / ENST00000522642 / ENST00000578500 / NM_032336	mitotic cell cycle / DNA strand elongation involved in DNA replication / DNA replication / S phase of mitotic cell cycle	nucleoplasm/cytoplasm/nucleus	protein binding
UBC	0.296397	628	227	37	UBC	TRUE	TRUE	TRUE	FALSE	FALSE	TRUE	FALSE	TRUE	TRUE	0.412275	0.0736405	0.00950405	1.25453	0.0272704	0.0148313	0.0389199	0.0339344	0.000731542	0.940027	0.0141889	0.133607	0.00019979	0.000205619	0.0304548	55	72	1459	227	828	8	11	16758874	UBC	AB209782 / ENST00000339647 / ENST00000546120 / NM_021009	G1/S transition of mitotic cell cycle / negative regulation of transcription from RNA polymerase II promoter / activation of MAPK activity / protein polyubiquitination / mitotic cell cycle / toll-like receptor signaling pathway / antigen processing and presentation of peptide antigen via MHC class I / antigen processing and presentation of exogenous peptide antigen via MHC class I, TAP-dependent …	nucleoplasm/cytosol/endosome membrane/endocytic vesicle membrane/nucleus/cytoplasm/plasma membrane	protease binding/protein binding
CDC25A	0.295745	743	1182	20	CDC25A	TRUE	FALSE	FALSE	FALSE	TRUE	FALSE	FALSE	TRUE	TRUE	0.345059	0.0240063	0.00118277	19.8296	0.00672163	0.00499336	0.020736	0.0169443	0.266446	1.84128e-05	0.480506	0.767091	0.0108789	0.0218177	0.0307138	56	1285	13	1182	1396	219	407	16953279	CDC25A	ENST00000302506 / ENST00000351231 / ENST00000437972 / ENST00000459900 / M81933 / NM_001789 / NM_201567	regulation of cyclin-dependent protein serine/threonine kinase activity / G1/S transition of mitotic cell cycle / G2/M transition of mitotic cell cycle / mitotic cell cycle / DNA replication / mitosis / cell proliferation / response to radiation / cellular response to UV / cell division / cell cycle checkpoint / S phase of mitotic cell cycle / M phase of mitotic cell cycle / protein dephosphoryla…	nucleoplasm/cytosol/intracellular/nucleus/cytoplasm	protein tyrosine phosphatase activity/protein binding/protein kinase binding/phosphoprotein phosphatase activity/hydrolase activity
DHRS3	0.293466	180	84	0	DHRS3	TRUE	TRUE	TRUE	FALSE	TRUE	TRUE	TRUE	TRUE	TRUE	0	0.0438687	0.00673274	15.6436	0.031203	0.0337835	0.029829	0.0306026	0.0227701	0.000137111	0.00803971	0.00466615	0.0013029	0.000471439	0.0316379	57	405	44	148	84	38	21	16681827	DHRS3	BC002730 / ENST00000376223 / ENST00000430996 / ENST00000464917 / ENST00000482265 / NM_004753	retinoid metabolic process / visual perception / phototransduction, visible light / retinol metabolic process / metabolic process / oxidation-reduction process / biosynthetic process	integral to membrane/photoreceptor outer segment membrane/membrane	nucleotide binding/electron carrier activity/NADP-retinol dehydrogenase activity/oxidoreductase activity
E2F1	0.29216	670	900	53	E2F1	TRUE	FALSE	FALSE	FALSE	TRUE	FALSE	FALSE	TRUE	TRUE	0.452101	0.0268885	0.00336812	14.9548	0.0115192	0.00762112	0.0231644	0.0196034	0.188785	0.000195681	0.198529	0.516373	0.00600902	0.00976621	0.0321806	58	1202	52	900	1225	146	232	16918445	E2F1	BC050369 / ENST00000343380 / NM_005225	DNA damage checkpoint / G1 phase of mitotic cell cycle / G1/S transition of mitotic cell cycle / G2 phase of mitotic cell cycle / negative regulation of transcription from RNA polymerase II promoter / mitotic cell cycle / transcription, DNA-dependent / regulation of transcription, DNA-dependent / spermatogenesis / cell proliferation / intrinsic apoptotic signaling pathway in response to DNA damag…	nucleus/nucleoplasm/cytoplasm/Rb-E2F complex/transcription factor complex	core promoter binding/DNA binding/sequence-specific DNA binding transcription factor activity/transcription corepressor activity/protein binding/transcription factor binding/sequence-specific DNA binding
ABO	0.290333	368	352	38	ABO	TRUE	TRUE	TRUE	FALSE	TRUE	TRUE	FALSE	TRUE	TRUE	0.415219	0.0455711	0.00323631	11.0527	0.0232036	0.00754445	0.0211526	0.0190555	0.0184655	0.00173056	0.0264618	0.523111	0.00981144	0.0115003	0.0329573	59	352	151	378	1229	200	264	17099463	ABO	AK124587	protein glycosylation / carbohydrate metabolic process	extracellular region/integral to Golgi membrane/Golgi cisterna membrane/Golgi apparatus/membrane/integral to membrane	glycoprotein-fucosylgalactoside alpha-N-acetylgalactosaminyltransferase activity/fucosylgalactoside 3-alpha-galactosyltransferase activity/metal ion binding/transferase activity/transferase activity, transferring glycosyl groups/transferase activity, transferring hexosyl groups
SEMA7A	0.288886	176	126	1	SEMA7A	TRUE	TRUE	TRUE	FALSE	TRUE	TRUE	TRUE	TRUE	TRUE	0.0785596	0.0623821	0.00655633	7.46687	0.0578085	0.0365411	0.0235956	0.0286043	0.00252978	0.0171604	0.000334951	0.00303421	0.00541921	0.000789972	0.033587	60	126	334	19	54	135	31	16811638	SEMA7A	AF069493 / ENST00000261918 / ENST00000542748 / ENST00000543145 / ENST00000567345 / ENST00000569617 / NM_001146029 / NM_001146030 / NM_003612	inflammatory response / immune response / integrin-mediated signaling pathway / axon guidance / positive regulation of axon extension / regulation of inflammatory response / positive regulation of macrophage cytokine production / positive regulation of ERK1 and ERK2 cascade / multicellular organismal development / nervous system development / cell differentiation	plasma membrane/external side of plasma membrane/anchored to membrane/membrane	receptor activity/integrin binding/protein binding
SPRY1	0.286783	309	126	9	SPRY1	TRUE	TRUE	TRUE	FALSE	FALSE	TRUE	TRUE	TRUE	TRUE	0.260969	0.0521253	0.00882521	4.40617	0.0331141	0.0476533	0.0318362	0.0345788	0.00835035	0.151357	0.00616929	0.000608424	0.000844629	0.000175874	0.0345249	61	218	655	126	9	30	10	16970435	SPRY1	AY192146 / BC063856 / ENST00000339241 / ENST00000394339 / ENST00000505319 / ENST00000507703 / ENST00000508849 / ENST00000515726 / GENSCAN00000037155 / NM_001258038 / NM_001258039 / NM_005841 / NM_199327 / OTTHUMT00000256711 / OTTHUMT00000363944 / OTTHUMT00000363945 / OTTHUMT00000363946 / OTTHUMT00000363947 / OTTHUMT00000363948 / uc003ifa.3 / uc003ifb.3 / uc021xro.1	metanephros development / ureteric bud development / organ induction / epidermal growth factor receptor signaling pathway / negative regulation of cell proliferation / negative regulation of Ras GTPase activity / negative regulation of fibroblast growth factor receptor signaling pathway / negative regulation of epidermal growth factor receptor signaling pathway / negative regulation of MAP kinase…	cytoplasm/cytosol/plasma membrane/lamellipodium/membrane	protein binding
EREG	0.286059	550	595	216	EREG	TRUE	TRUE	TRUE	FALSE	FALSE	TRUE	FALSE	FALSE	FALSE	0.609744	0.0465779	0.00450918	4.97188	0.0499488	0.00898205	0.00840064	0.0119599	0.0163233	0.100405	0.000776231	0.406553	0.282017	0.1039	0.0348542	62	331	595	31	1127	1013	946	16967843	EREG	D30783 / ENST00000244869 / ENST00000507603 / NM_001432	angiogenesis / ovarian cumulus expansion / oocyte maturation / positive regulation of cytokine production / female meiosis / epidermal growth factor receptor signaling pathway / cell-cell signaling / positive regulation of cell proliferation / negative regulation of cell proliferation / fibroblast growth factor receptor signaling pathway / mRNA transcription / anatomical structure morphogenesis /…	extracellular region/extracellular space/integral to plasma membrane/plasma membrane/membrane/integral to membrane	epidermal growth factor receptor binding/protein binding/growth factor activity
ANGPTL4	0.285731	210	220	5	ANGPTL4	TRUE	TRUE	TRUE	FALSE	TRUE	TRUE	TRUE	TRUE	TRUE	0.203074	0.0508252	0.0084302	9.53972	0.0471373	0.0268049	0.020646	0.0238801	0.00975647	0.00438975	0.00106687	0.0147882	0.011125	0.00284095	0.0350045	63	246	220	40	233	220	88	16857886	ANGPTL4	AB056477 / AF153606 / AF169312 / AF202636 / AK303269 / AY358275 / BC023647 / ENST00000301455 / ENST00000393962 / ENST00000541807 / ENST00000593998 / ENST00000594348 / ENST00000594875 / ENST00000595079 / ENST00000597137 / ENST00000598255 / ENST00000599192 / ENST00000601886 / GENSCAN00000021206 / NM_001039667 / NM_139314 / OTTHUMT00000460318 / OTTHUMT00000460319 / OTTHUMT00000460320 / OTTHUMT000004…	angiogenesis / response to hypoxia / cell differentiation / negative regulation of apoptotic process / cellular lipid metabolic process / small molecule metabolic process / positive regulation of angiogenesis / negative regulation of lipoprotein lipase activity / protein homooligomerization / triglyceride homeostasis / multicellular organismal development / signal transduction	extracellular region/proteinaceous extracellular matrix/extracellular space	enzyme inhibitor activity/protein binding/receptor binding
CCL2	0.284205	474	495	117	CCL2	TRUE	TRUE	TRUE	FALSE	TRUE	TRUE	FALSE	FALSE	TRUE	0.540697	0.0437832	0.00204041	6.07939	0.0407718	0.0144976	0.0147454	0.016873	0.0230118	0.0452115	0.00227888	0.142495	0.0511468	0.0223012	0.0357135	64	408	495	66	849	643	413	16833204	CCL2	BC009716 / ENST00000225831 / ENST00000582017 / NM_002982	MAPK cascade / angiogenesis / response to hypoxia / positive regulation of endothelial cell proliferation / monocyte chemotaxis / protein phosphorylation / cellular calcium ion homeostasis / chemotaxis / inflammatory response / humoral immune response / activation of signaling protein activity involved in unfolded protein response / cytoskeleton organization / cell adhesion / signal transduction …	extracellular region/extracellular space/cytoplasm/neuronal cell body	protein kinase activity/receptor binding/chemokine activity/heparin binding/CCR2 chemokine receptor binding/G-protein coupled receptor binding/cytokine activity/protein binding
ADRB2	0.281275	448	508	53	ADRB2	TRUE	TRUE	TRUE	FALSE	TRUE	TRUE	FALSE	FALSE	FALSE	0.452101	0.0648452	0.00538199	6.02172	0.0372359	0.00970007	0.0081459	0.0108291	0.00191641	0.0471093	0.00356541	0.356468	0.301336	0.148261	0.037118	65	105	508	86	1078	1030	1041	16990848	ADRB2	ENST00000305988 / M15169 / NM_000024	diet induced thermogenesis / vasodilation by norepinephrine-epinephrine involved in regulation of systemic arterial blood pressure / regulation of sodium ion transport / desensitization of G-protein coupled receptor protein signaling pathway by arrestin / receptor-mediated endocytosis / cell surface receptor signaling pathway / activation of transmembrane receptor protein tyrosine kinase activity…	nucleus/lysosome/endosome/plasma membrane/integral to plasma membrane/apical plasma membrane/receptor complex/membrane/integral to membrane	beta2-adrenergic receptor activity/protein binding/adenylate cyclase binding/potassium channel regulator activity/protein homodimerization activity/norepinephrine binding/signal transducer activity/G-protein coupled receptor activity/adrenergic receptor activity
PDLIM5	0.28046	340	406	0	PDLIM5	TRUE	TRUE	TRUE	FALSE	FALSE	TRUE	FALSE	TRUE	TRUE	0	0.112133	0.00138921	5.11326	0.0337241	0.0168813	0.0174906	0.0187418	1.72408e-05	0.0906176	0.00567751	0.0901207	0.0248122	0.012635	0.0375194	66	21	580	118	732	406	277	16969009	PDLIM5	AB209531 / AF061258 / AK291624 / AK291898 / AK296980 / AK304125 / AY345240 / AY598328 / BC008741 / BC017902 / BT007328 / ENST00000317968 / ENST00000318007 / ENST00000359265 / ENST00000380176 / ENST00000380180 / ENST00000437932 / ENST00000450793 / ENST00000503974 / ENST00000506632 / ENST00000508216 / ENST00000508531 / ENST00000509333 / ENST00000509357 / ENST00000510099 / ENST00000511586 / ENST0000…	regulation of synapse assembly / regulation of dendritic spine morphogenesis	cytosol/plasma membrane/postsynaptic density/actin cytoskeleton/membrane/cell junction/postsynaptic membrane/cytoplasm/neuron projection/synapse/Z disc	actin binding/protein kinase C binding/zinc ion binding/actinin binding/metal ion binding/protein binding/protein N-terminus binding
TOP2A	0.280436	621	766	49	TOP2A	TRUE	TRUE	FALSE	FALSE	TRUE	FALSE	FALSE	FALSE	FALSE	0.443379	0.0365526	0.00531477	14.3228	0.00620521	0.00852598	0.013765	0.0122619	0.0566875	0.000273159	0.526083	0.441214	0.0665367	0.0944518	0.0375312	67	766	67	1222	1168	697	918	16844312	TOP2A	BC140791 / ENST00000423485 / ENST00000577706 / ENST00000578412 / NM_001067	mitotic cell cycle / resolution of meiotic recombination intermediates / sister chromatid segregation / DNA replication / DNA-dependent DNA replication / DNA topological change / DNA ligation / DNA repair / mitotic recombination / response to DNA damage stimulus / chromosome segregation / apoptotic chromosome condensation / embryonic cleavage / positive regulation of apoptotic process / positive …	nuclear chromosome/synaptonemal complex/nucleus/nucleoplasm/nucleolus/centriole/nucleoid/DNA topoisomerase complex (ATP-hydrolyzing)/viral integration complex/protein complex/condensed chromosome/cytoplasm/chromosome	magnesium ion binding/DNA binding/chromatin binding/DNA topoisomerase type II (ATP-hydrolyzing) activity/protein kinase C binding/protein binding/ATP binding/protein C-terminus binding/DNA-dependent ATPase activity/drug binding/DNA binding, bending/enzyme binding/protein homodimerization activity/histone deacetylase binding/ubiquitin binding/protein heterodimerization activity/nucleotide binding/…
MT1X	0.277772	267	305	0	MT1X	TRUE	TRUE	TRUE	FALSE	TRUE	TRUE	TRUE	FALSE	TRUE	0	0.0955034	0.00857805	6.61982	0.0249488	0.0392074	0.0139631	0.019086	7.99199e-05	0.0308492	0.0201568	0.00202683	0.0630832	0.011396	0.0388759	68	34	424	305	36	684	259	16819264	MT1X	BC032338 / ENST00000394485 / ENST00000562939 / ENST00000564974 / ENST00000567563 / ENST00000568370 / NM_005952	response to metal ion / cellular response to erythropoietin / negative regulation of growth / cellular response to cadmium ion / cellular response to zinc ion	nucleus/cytoplasm/perinuclear region of cytoplasm	zinc ion binding/metal ion binding
TYMS	0.277365	738	1211	14	TYMS	TRUE	FALSE	FALSE	FALSE	TRUE	FALSE	FALSE	TRUE	TRUE	0.306924	0.0264238	0.00444977	18.9325	0.00392176	0.00563681	0.0200031	0.0162686	0.199728	2.77386e-05	0.756419	0.704106	0.0130645	0.0268685	0.0390859	69	1211	14	1365	1351	254	476	16850477	TYMS	AB062290 / ENST00000323274 / ENST00000579128 / ENST00000581920 / NM_001071	G1/S transition of mitotic cell cycle / regulation of transcription involved in G1/S phase of mitotic cell cycle / mitotic cell cycle / polysaccharide metabolic process / nucleobase-containing compound metabolic process / pyrimidine nucleobase metabolic process / dTMP biosynthetic process / dTTP biosynthetic process / DNA replication / DNA repair / aging / circadian rhythm / deoxyribonucleoside m…	nucleus/nucleoplasm/nucleolus/cytoplasm/mitochondrion/mitochondrial inner membrane/mitochondrial matrix/cytosol/membrane	nucleotide binding/mRNA binding/thymidylate synthase activity/folic acid binding/drug binding/protein homodimerization activity/cofactor binding/methyltransferase activity/transferase activity
BDKRB2	0.274862	411	296	37	BDKRB2	TRUE	TRUE	TRUE	FALSE	TRUE	TRUE	FALSE	FALSE	FALSE	0.412275	0.057438	0.00743152	7.99891	0.0376016	0.0139946	0.00409251	0.00853528	0.0044646	0.0119744	0.00340091	0.157038	0.751552	0.298824	0.0404046	70	164	296	82	873	1361	1255	16788023	BDKRB2	CR749338 / ENST00000306005 / ENST00000539359 / ENST00000542454 / ENST00000554311 / NM_000623	smooth muscle contraction / inflammatory response / cell surface receptor signaling pathway / transmembrane receptor protein tyrosine kinase signaling pathway / G-protein coupled receptor signaling pathway / elevation of cytosolic calcium ion concentration / blood circulation / response to salt stress / regulation of vasoconstriction / negative regulation of peptidyl-serine phosphorylation / nega…	endosome/plasma membrane/integral to plasma membrane/membrane/integral to membrane	protease binding/phosphatidylinositol phospholipase C activity/bradykinin receptor activity/protein binding/type 1 angiotensin receptor binding/protein heterodimerization activity/signal transducer activity/G-protein coupled receptor activity
ERRFI1	0.273881	409	282	25	ERRFI1	TRUE	TRUE	TRUE	FALSE	TRUE	TRUE	FALSE	FALSE	FALSE	0.369264	0.058431	0.00296862	8.1701	0.0460067	0.00712578	0.00773286	0.0108212	0.00397867	0.0106807	0.00121588	0.560829	0.335106	0.148629	0.0409345	71	155	282	43	1263	1062	1042	16681304	ERRFI1	BC025337 / ENST00000377482 / ENST00000487559 / NM_018948	response to stress / negative regulation of epidermal growth factor-activated receptor activity / negative regulation of protein autophosphorylation / positive regulation of Rho GTPase activity / skin morphogenesis / regulation of keratinocyte differentiation / lung alveolus development / lung vasculature development / lung epithelium development / negative regulation of epidermal growth factor r…	nucleus/cytoplasm/extrinsic to internal side of plasma membrane/plasma membrane/membrane	Rho GTPase activator activity/protein binding/protein kinase binding
TMEM156	0.271479	302	201	0	TMEM156	TRUE	TRUE	TRUE	FALSE	TRUE	FALSE	FALSE	TRUE	TRUE	0	0.0632195	0.00394107	9.87511	0.011448	0.0145079	0.0553644	0.0448953	0.00230097	0.00355507	0.201164	0.142212	1.08183e-05	1.70306e-05	0.0422637	72	119	201	906	847	2	2	16975234	TMEM156	BC030803 / ENST00000372489 / ENST00000381938 / ENST00000495029 / NM_024943	NA	integral to membrane/membrane	NA
CEACAM5	0.271229	727	1054	225	CEACAM5	TRUE	FALSE	FALSE	FALSE	TRUE	FALSE	FALSE	TRUE	TRUE	0.61435	0.0315235	0.0079492	9.0166	0.00823685	0.00561246	0.0217765	0.0179542	0.106498	0.00613219	0.365133	0.706506	0.00841508	0.0160289	0.0424047	73	1054	249	1097	1354	183	328	16862548	CEACAM5	ENST00000221992 / ENST00000405816 / ENST00000596606 / M29540 / NM_004363	NA	integral to plasma membrane/basolateral plasma membrane/anchored to membrane/plasma membrane/membrane	identical protein binding/protein binding
LOC100507507	0.265112	272	148	0	LOC100507507	TRUE	TRUE	TRUE	FALSE	TRUE	TRUE	FALSE	FALSE	FALSE	0	0.0593014	0.0026829	14.6407	0.0473347	0.0171887	0.0078288	0.0126809	0.00359811	0.000230762	0.00104298	0.0849875	0.326987	0.0827404	0.0460165	74	148	62	39	723	1057	890	17063945	LOC100507507	ENST00000429630	NA	NA	NA
CD44	0.264422	755	890	328	CD44	TRUE	FALSE	FALSE	FALSE	TRUE	FALSE	TRUE	FALSE	FALSE	0.656911	0.0285007	0.0029299	7.70011	0.011678	0.0234305	0.0073925	0.0104226	0.154986	0.0146439	0.192778	0.0267541	0.365278	0.168306	0.0464441	75	1162	318	890	379	1086	1074	16723614	CD44	AF098641 / AK290424 / AK297776 / AK304467 / AL832642 / AY101192 / AY101193 / BC004372 / BC052287 / BC067348 / EF581837 / ENST00000263398 / ENST00000278385 / ENST00000278386 / ENST00000279452 / ENST00000352818 / ENST00000360158 / ENST00000415148 / ENST00000425428 / ENST00000428726 / ENST00000433354 / ENST00000433892 / ENST00000434472 / ENST00000437706 / ENST00000442151 / ENST00000449691 / ENST0000…	branching involved in ureteric bud morphogenesis / wound healing involved in inflammatory response / carbohydrate metabolic process / cell-matrix adhesion / positive regulation of gene expression / Wnt receptor signaling pathway / cell-cell adhesion / cytokine-mediated signaling pathway / glycosaminoglycan metabolic process / hyaluronan metabolic process / hyaluronan catabolic process / positive …	plasma membrane/integral to plasma membrane/external side of plasma membrane/cell surface/basolateral plasma membrane/membrane/integral to membrane/cellular_component/cytoplasm/Golgi apparatus	hyalurononglucosaminidase activity/transmembrane signaling receptor activity/protein binding/collagen binding/hyaluronic acid binding/molecular_function
KLF10	0.263553	338	351	4	KLF10	TRUE	TRUE	TRUE	FALSE	TRUE	TRUE	TRUE	FALSE	TRUE	0.18241	0.0625306	0.00251948	6.74928	0.0634233	0.024197	0.00726706	0.0147684	0.00248753	0.0281749	0.000191014	0.0233356	0.376941	0.0428682	0.0469884	76	124	404	12	351	1094	671	17079910	KLF10	BC095399 / ENST00000285407 / ENST00000395884 / NM_001032282 / NM_005655	negative regulation of transcription from RNA polymerase II promoter / skeletal system development / transcription, DNA-dependent / induction of apoptosis / transforming growth factor beta receptor signaling pathway / cell-cell signaling / cell proliferation / negative regulation of cell proliferation / bone mineralization / somatic stem cell maintenance / positive regulation of osteoclast differ…	nucleus/intracellular	DNA binding/sequence-specific DNA binding transcription factor activity/protein binding/zinc ion binding/nucleic acid binding/metal ion binding
BLID	0.262684	383	143	2	BLID	TRUE	TRUE	TRUE	FALSE	FALSE	TRUE	TRUE	FALSE	TRUE	0.124514	0.0827637	0.00866223	3.92079	0.0314349	0.0464698	0.00907018	0.0171672	0.000281872	0.214643	0.00778256	0.000715606	0.236424	0.0203764	0.04754	77	52	725	143	11	961	390	16745503	BLID	AF303179 / ENST00000560104 / NM_001001786	apoptotic process	mitochondrion/cytoplasm	NA
LAMC2	0.257753	773	1037	18	LAMC2	FALSE	FALSE	FALSE	FALSE	TRUE	FALSE	FALSE	TRUE	TRUE	0.333715	0.0205865	0.00473444	17.3869	0.00511433	0.0103937	0.0170624	0.0149552	0.392491	5.76349e-05	0.631764	0.313195	0.0277357	0.0404323	0.0508052	78	1365	25	1306	1037	440	642	16674845	LAMC2	AK296944 / ENST00000264144 / ENST00000493293 / NM_005562 / NM_018891	cell adhesion / epidermis development / extracellular matrix organization / hemidesmosome assembly / cell junction assembly	extracellular region/laminin-5 complex/proteinaceous extracellular matrix/basement membrane	heparin binding/protein binding
NR4A1	0.257662	509	641	16	NR4A1	FALSE	TRUE	TRUE	FALSE	FALSE	TRUE	FALSE	FALSE	FALSE	0.321109	0.0728819	0.0128204	4.53404	0.0518657	0.00897642	0.00513207	0.00966726	0.000793525	0.137964	0.000628351	0.406968	0.617415	0.21253	0.0508674	79	75	641	28	1128	1277	1137	16751438	NR4A1	AK131566 / ENST00000243050 / ENST00000360284 / ENST00000394825 / ENST00000478250 / ENST00000545748 / ENST00000546842 / ENST00000550082 / ENST00000550557 / NM_001202233 / NM_002135 / NM_173157	positive regulation of endothelial cell proliferation / cell migration involved in sprouting angiogenesis / transcription initiation from RNA polymerase II promoter / induction of apoptosis / signal transduction / epidermal growth factor receptor signaling pathway / fibroblast growth factor receptor signaling pathway / gene expression / intracellular receptor signaling pathway / endothelial cell …	nucleus/nucleoplasm/transcription factor complex	RNA polymerase II core promoter proximal region sequence-specific DNA binding transcription factor activity involved in positive regulation of transcription/DNA binding/steroid hormone receptor activity/ligand-activated sequence-specific DNA binding RNA polymerase II transcription factor activity/protein binding/zinc ion binding/protein homodimerization activity/sequence-specific DNA binding/prot…
KLF6	0.257524	365	395	5	KLF6	FALSE	TRUE	TRUE	FALSE	TRUE	TRUE	FALSE	FALSE	FALSE	0.203074	0.0789566	0.00641596	6.82811	0.0278396	0.0187867	0.0080315	0.0114747	0.000417383	0.0266663	0.0130425	0.0627992	0.310383	0.121067	0.0509623	80	62	395	212	663	1036	985	16711280	KLF6	AB017493 / AF001461 / AK293259 / BC000311 / BT006778 / BX537374 / ENST00000173785 / ENST00000380946 / ENST00000461124 / ENST00000469435 / ENST00000497571 / ENST00000542957 / FJ619623 / GENSCAN00000001648 / n407948 / NM_001160124 / NM_001160125 / NM_001300 / NR_027653 / OTTHUMT00000046495 / OTTHUMT00000046496 / OTTHUMT00000046497 / OTTHUMT00000046498 / OTTHUMT00000046499 / uc001iha.3 / uc001ihb.2 …	transcription, DNA-dependent / regulation of transcription, DNA-dependent / cytokine-mediated signaling pathway / B cell differentiation / positive regulation of transcription, DNA-dependent / cell growth / biological_process / wound healing / positive regulation of transcription from RNA polymerase II promoter	nucleus/cytoplasm/cellular_component/intracellular	DNA binding/zinc ion binding/nucleic acid binding/metal ion binding/molecular_function/double-stranded DNA binding/sequence-specific DNA binding transcription factor activity
MCM6	0.255903	744	955	3	MCM6	FALSE	FALSE	FALSE	FALSE	TRUE	FALSE	FALSE	TRUE	TRUE	0.157119	0.0197949	0.00292718	20.6545	0.00235356	0.0120576	0.0230576	0.0194989	0.427267	1.27442e-05	0.907972	0.228177	0.00616529	0.0100744	0.0520913	81	1379	10	1429	955	147	238	16903090	MCM6	BC032374 / ENST00000264156 / ENST00000483902 / ENST00000492091 / NM_005915	G1/S transition of mitotic cell cycle / mitotic cell cycle / DNA replication / DNA unwinding involved in replication / DNA replication initiation / DNA strand elongation involved in DNA replication / cell cycle / DNA duplex unwinding / cell cycle checkpoint / S phase of mitotic cell cycle / M/G1 transition of mitotic cell cycle / photosynthesis / chlorophyll biosynthetic process	nucleus/nucleoplasm/nucleolus/MCM complex	single-stranded DNA binding/ATP-dependent DNA helicase activity/protein binding/ATP binding/identical protein binding/nucleotide binding/DNA binding/DNA helicase activity/helicase activity/hydrolase activity/magnesium chelatase activity
MET	0.255753	959	1302	1358	MET	FALSE	FALSE	FALSE	FALSE	TRUE	FALSE	FALSE	TRUE	TRUE	0.817674	0.0188595	0.00594376	6.50809	0.00148375	0.00648511	0.0177589	0.0145237	0.470965	0.03337	0.965939	0.621164	0.0231467	0.0462874	0.0521967	82	1396	434	1458	1302	379	703	17050591	MET	BC130420 / ENST00000318493 / ENST00000397752 / ENST00000436117 / ENST00000539704 / NM_000245 / NM_001127500	activation of MAPK activity / liver development / placenta development / signal transduction / cell surface receptor signaling pathway / axon guidance / brain development / cell proliferation / positive regulation of glucose transport / muscle cell migration / myotube differentiation / adult behavior / glucose homeostasis / positive regulation of transcription from RNA polymerase II promoter / pr…	extracellular region/plasma membrane/integral to plasma membrane/basal plasma membrane/integral to membrane/membrane	protein tyrosine kinase activity/hepatocyte growth factor-activated receptor activity/protein binding/ATP binding/nucleotide binding/protein kinase activity/transmembrane receptor protein tyrosine kinase activity/receptor activity/kinase activity/transferase activity/transferase activity, transferring phosphorus-containing groups/protein phosphatase binding
CDK1	0.25531	667	824	38	CDK1	FALSE	TRUE	FALSE	FALSE	TRUE	FALSE	FALSE	FALSE	FALSE	0.415219	0.0337445	0.00646578	13.1756	0.0140431	0.00654434	0.0112684	0.0107122	0.0806429	0.00050968	0.125034	0.615476	0.13083	0.153776	0.0525112	83	941	92	781	1296	824	1049	16705159	CDK1	CR933728 / ENST00000316629 / ENST00000373809 / ENST00000395284 / ENST00000448257 / ENST00000475504 / ENST00000487784 / ENST00000519078 / ENST00000519760 / NM_001170406 / NM_001170407 / NM_001786 / NM_033379	G1/S transition of mitotic cell cycle / regulation of transcription involved in G1/S phase of mitotic cell cycle / G2/M transition of mitotic cell cycle / MAPK cascade / activation of MAPKK activity / activation of MAPK activity / microtubule cytoskeleton organization / mitotic cell cycle / toll-like receptor signaling pathway / MyD88-dependent toll-like receptor signaling pathway / MyD88-indepen…	nucleus/nucleoplasm/cytoplasm/mitochondrion/microtubule organizing center/cytosol/spindle microtubule/midbody/cytoskeleton	protein kinase activity/cyclin-dependent protein serine/threonine kinase activity/protein binding/ATP binding/RNA polymerase II carboxy-terminal domain kinase activity/cyclin binding/Hsp70 protein binding/histone kinase activity/nucleotide binding/protein serine/threonine kinase activity/kinase activity/transferase activity/transferase activity, transferring phosphorus-containing groups/protein t…
CXCL17	0.254474	455	728	0	CXCL17	FALSE	TRUE	FALSE	FALSE	TRUE	FALSE	FALSE	TRUE	TRUE	0	0.0372823	0.00566798	17.2421	0.00914408	0.0158994	0.0356366	0.0301394	0.0517287	6.18264e-05	0.308718	0.108768	0.000383449	0.000530685	0.0531084	84	728	27	1041	778	13	23	16872796	CXCL17	AY598464 / ENST00000341918 / ENST00000601181 / NM_198477	angiogenesis / chemotaxis / cell differentiation / multicellular organismal development	extracellular region	NA
ZFP36	0.253661	378	332	13	ZFP36	FALSE	TRUE	TRUE	FALSE	TRUE	TRUE	FALSE	FALSE	FALSE	0.299104	0.0651527	0.00676597	7.4838	0.0303815	0.0101572	0.0100919	0.0117936	0.00185158	0.0169633	0.00902883	0.327396	0.179863	0.109496	0.0536968	85	102	332	160	1048	895	954	16861997	ZFP36	ENST00000248673 / ENST00000597629 / M92843 / NM_003407	negative regulation of transcription from RNA polymerase II promoter / mRNA catabolic process / response to stress / gene expression / RNA metabolic process / mRNA metabolic process / regulation of tumor necrosis factor production / negative regulation of translation involved in gene silencing by miRNA / positive regulation of nuclear-transcribed mRNA poly(A) tail shortening / 3'-UTR-mediated mRN…	nucleus/cytoplasm/cytosol/cytoplasmic stress granule	DNA binding/single-stranded RNA binding/mRNA binding/protein binding/zinc ion binding/AU-rich element binding/protein kinase binding/C-C chemokine binding/14-3-3 protein binding/metal ion binding/mRNA 3'-UTR AU-rich region binding/nucleic acid binding
CPEB2	0.253212	208	186	0	CPEB2	FALSE	TRUE	TRUE	FALSE	TRUE	TRUE	TRUE	TRUE	TRUE	0	0.0547104	0.0131792	8.04808	0.0613759	0.0232746	0.0297042	0.0312719	0.00614493	0.0115867	0.000233621	0.0275126	0.001339	0.00039784	0.0540245	86	186	290	16	388	40	20	16965162	CPEB2	BC103940 / ENST00000345451 / ENST00000382395 / ENST00000382401 / ENST00000442003 / ENST00000503926 / ENST00000507071 / ENST00000538197 / ENST00000541112 / NM_001177381 / NM_001177382 / NM_001177383 / NM_001177384 / NM_182485 / NM_182646	regulation of translation / negative regulation of GTP catabolic process / negative regulation of translational elongation	cytoplasm/polysome	nucleotide binding/RNA binding/nucleic acid binding/poly-pyrimidine tract binding/protein binding
SOX2	0.25145	630	383	104	SOX2	FALSE	TRUE	TRUE	FALSE	FALSE	TRUE	FALSE	TRUE	TRUE	0.527468	0.0446548	0.00538192	2.32171	0.0345793	0.0147568	0.0229869	0.0225813	0.0206667	0.613357	0.00505922	0.135541	0.00627112	0.00410161	0.0553327	87	383	1145	109	830	151	123	16948461	SOX2	BC013923 / ENST00000325404 / ENST00000431565 / NM_003106 / sox2ot	negative regulation of transcription from RNA polymerase II promoter / osteoblast differentiation / eye development / endodermal cell fate specification / positive regulation of neuroblast proliferation / chromatin organization / regulation of transcription, DNA-dependent / cell cycle arrest / response to wounding / regulation of gene expression / glial cell fate commitment / forebrain neuron dif…	nucleus/transcription factor complex/cytoplasm/cytosol	transcription regulatory region sequence-specific DNA binding/RNA polymerase II core promoter proximal region sequence-specific DNA binding transcription factor activity involved in positive regulation of transcription/DNA binding/chromatin binding/sequence-specific DNA binding transcription factor activity/protein binding/miRNA binding/sequence-specific DNA binding/transcription regulatory regio…
TK1	0.250675	585	499	3	TK1	FALSE	FALSE	FALSE	FALSE	TRUE	TRUE	FALSE	TRUE	TRUE	0.157119	0.0288916	0.00322768	16.9113	0.0210156	0.0166545	0.0163976	0.0168253	0.147693	7.26723e-05	0.0376135	0.0941114	0.0330073	0.0226305	0.0559187	88	1145	32	497	741	499	418	16849379	TK1	BC006484 / ENST00000301634 / ENST00000405273 / ENST00000588734 / ENST00000592126 / NM_003258	liver development / nucleobase-containing compound metabolic process / pyrimidine nucleobase metabolic process / DNA replication / nucleotide biosynthetic process / response to toxic substance / skeletal muscle cell proliferation / response to nutrient levels / pyrimidine nucleoside salvage / small molecule metabolic process / thymidine metabolic process / response to copper ion / digestive tract…	cytosol/cytoplasm	thymidine kinase activity/ATP binding/zinc ion binding/nucleoside kinase activity/nucleotide binding/kinase activity/transferase activity/identical protein binding/metal ion binding
SLCO2A1	0.249633	508	787	3	SLCO2A1	FALSE	TRUE	FALSE	FALSE	TRUE	FALSE	TRUE	FALSE	TRUE	0.157119	0.0342208	0.00958778	14.8165	0.0134005	0.034592	0.0119386	0.015836	0.0759642	0.000210373	0.140497	0.00410717	0.109069	0.0307236	0.0567162	89	909	57	811	76	787	525	16959386	SLCO2A1	AK303550 / AK309561 / BC041140 / BC051347 / ENST00000310926 / ENST00000462770 / ENST00000464676 / ENST00000477061 / ENST00000478651 / ENST00000481359 / ENST00000493729 / GENSCAN00000029077 / NM_005630 / OTTHUMT00000357131 / OTTHUMT00000357132 / OTTHUMT00000357133 / OTTHUMT00000357134 / OTTHUMT00000357135 / OTTHUMT00000357136 / OTTHUMT00000357137 / U70867 / uc003eqa.4 / uc010htw.1 / uc011blv.2	lipid transport / sodium-independent organic anion transport / transmembrane transport / transport / prostaglandin transport	plasma membrane/integral to plasma membrane/membrane/integral to membrane	lipid transporter activity/prostaglandin transmembrane transporter activity/transporter activity/protein binding
AREGB	0.249567	359	339	0	AREGB	FALSE	TRUE	TRUE	FALSE	TRUE	TRUE	FALSE	FALSE	FALSE	0	0.0837939	0.00873805	7.40923	0.0632259	0.00929028	0.00939098	0.0138604	0.000253797	0.0178498	0.000194725	0.384382	0.217072	0.0570217	0.0567672	90	51	339	13	1108	939	783	16967853	AREG / AREGB	BC009799 / ENST00000264487 / ENST00000395748 / NM_001657	epidermal growth factor receptor signaling pathway / G-protein coupled receptor signaling pathway / cell-cell signaling / cell proliferation / positive regulation of DNA replication	extracellular space/cell surface/integral to membrane/membrane	cytokine activity/growth factor activity/protein binding
BMP2	0.248972	471	362	53	BMP2	FALSE	TRUE	TRUE	FALSE	TRUE	TRUE	FALSE	FALSE	FALSE	0.452101	0.0508631	0.00732089	7.11577	0.0274344	0.0105132	0.00649199	0.0089074	0.00971226	0.0218398	0.0138476	0.306226	0.455498	0.267555	0.0572289	91	245	362	224	1034	1160	1223	16911261	BMP2	ENST00000378827 / NM_001200	negative regulation of transcription from RNA polymerase II promoter / activation of MAPK activity / skeletal system development / osteoblast differentiation / branching involved in ureteric bud morphogenesis / response to hypoxia / in utero embryonic development / epithelial to mesenchymal transition / positive regulation of protein phosphorylation / positive regulation of endothelial cell proli…	extracellular region/extracellular space/cell surface	retinol dehydrogenase activity/receptor binding/cytokine activity/protein binding/growth factor activity/phosphatase activator activity/SMAD binding/protein heterodimerization activity/BMP receptor binding
RASA4	0.245666	444	644	0	RASA4	FALSE	TRUE	TRUE	FALSE	TRUE	FALSE	FALSE	TRUE	TRUE	0	0.0385283	0.00237194	16.1428	0.00541571	0.0195728	0.0351687	0.03009	0.0442507	0.000106464	0.60144	0.0541973	0.000421714	0.000537447	0.0598693	92	646	38	1284	644	15	24	17061097	OTTHUMG00000180800 / RASA4 / RASA4B / RASA4CP / RASA4DP / RP11-514P8.6 / UPK3BL	AK025420 / AK093486 / AK296589 / AK300412 / AK301666 / AK309730 / AK315928 / BC110873 / BC113663 / BC143584 / BC143585 / CR627444 / ENST00000262940 / ENST00000306682 / ENST00000424092 / ENST00000425524 / ENST00000446874 / ENST00000449970 / ENST00000460726 / ENST00000461209 / ENST00000462172 / ENST00000465829 / ENST00000467351 / ENST00000477184 / ENST00000481893 / ENST00000488284 / ENST00000495352…	positive regulation of Ras GTPase activity / intracellular signal transduction / negative regulation of Ras protein signal transduction / signal transduction / regulation of small GTPase mediated signal transduction / positive regulation of GTPase activity	cytoplasm/cytosol/intrinsic to internal side of plasma membrane/intracellular/plasma membrane/membrane	GTPase activator activity/Ras GTPase activator activity/phospholipid binding/metal ion binding/protein binding
RAD51	0.245218	733	752	32	RAD51	FALSE	FALSE	FALSE	FALSE	TRUE	FALSE	FALSE	TRUE	TRUE	0.396285	0.0175868	0.00425055	13.6943	0.00833446	0.0164009	0.0192623	0.0178747	0.534512	0.000383268	0.358628	0.098794	0.0157502	0.0164204	0.0602367	93	1409	79	1091	752	286	332	16799637	RAD51	D14134 / ENST00000267868 / ENST00000382643 / ENST00000423169 / ENST00000525066 / ENST00000526763 / ENST00000527860 / ENST00000530766 / ENST00000531277 / ENST00000532743 / NM_001164269 / NM_001164270 / NM_002875 / NM_133487	double-strand break repair via homologous recombination / DNA recombinase assembly / DNA unwinding involved in replication / DNA repair / double-strand break repair / DNA recombination / mitotic recombination / meiosis / reciprocal meiotic recombination / positive regulation of DNA ligation / protein homooligomerization / DNA metabolic process / response to DNA damage stimulus / regulation of dou…	condensed chromosome/condensed nuclear chromosome/lateral element/nucleus/nucleoplasm/cytoplasm/mitochondrion/mitochondrial matrix/PML body/perinuclear region of cytoplasm/nuclear chromosome	damaged DNA binding/double-stranded DNA binding/single-stranded DNA binding/protein binding/ATP binding/protein C-terminus binding/identical protein binding/single-stranded DNA-dependent ATPase activity/nucleotide binding/DNA binding/DNA-dependent ATPase activity/nucleoside-triphosphatase activity
BRCA1	0.244963	887	1374	228	BRCA1	FALSE	FALSE	FALSE	FALSE	TRUE	FALSE	FALSE	TRUE	FALSE	0.615844	0.0166672	0.000956545	11.1422	0.00279937	0.00528106	0.0166532	0.0136034	0.582854	0.00164043	0.869124	0.739089	0.0308661	0.0618342	0.0604467	94	1429	147	1410	1374	469	803	16845349	BRCA1	AB621825 / AF005068 / AK293762 / AK308084 / AY354539 / BC072418 / BC114511 / BC115037 / DQ333386 / DQ363751 / ENST00000309486 / ENST00000346315 / ENST00000351666 / ENST00000352993 / ENST00000354071 / ENST00000357654 / ENST00000393691 / ENST00000461221 / ENST00000461574 / ENST00000461798 / ENST00000467274 / ENST00000468300 / ENST00000470026 / ENST00000471181 / ENST00000473961 / ENST00000476777 / E…	double-strand break repair via homologous recombination / DNA repair / postreplication repair / double-strand break repair / regulation of transcription from RNA polymerase II promoter / regulation of transcription from RNA polymerase III promoter / fatty acid biosynthetic process / apoptotic process / response to DNA damage stimulus / DNA damage response, signal transduction by p53 class mediato…	ubiquitin ligase complex/ruffle/nucleus/nucleoplasm/chromosome/plasma membrane/focal adhesion/gamma-tubulin ring complex/ribonucleoprotein complex/BRCA1-BARD1 complex/filamentous actin/protein complex/BRCA1-A complex/cytoplasm/condensed chromosome/condensed nuclear chromosome/cellular_component/gamma-tubulin ring com [WARNING: THIS FIELD TRUNCATED]	DNA binding/transcription coactivator activity/RNA binding/ubiquitin-protein ligase activity/protein binding/zinc ion binding/tubulin binding/enzyme binding/ubiquitin protein ligase binding/transcription regulatory region DNA binding/androgen receptor binding/ligase activity/metal ion binding/damaged DNA binding/molecular_function/tubulin bin [WARNING: THIS FIELD TRUNCATED]
SNORA74A	0.244459	417	210	0	SNORA74A	FALSE	TRUE	TRUE	FALSE	FALSE	TRUE	TRUE	TRUE	TRUE	0	0.0897965	0.011681	2.89316	0.0204078	0.0462822	0.0209483	0.0251256	0.00013919	0.43454	0.0415617	0.00073438	0.0103203	0.00201034	0.0608646	95	40	955	544	12	210	66	16989863	SNORA74A	NR_002915	NA	NA	NA
CDC20	0.243753	569	709	2	CDC20	FALSE	TRUE	TRUE	FALSE	TRUE	FALSE	FALSE	FALSE	FALSE	0.124514	0.0380702	0.00515678	18.4232	0.00803718	0.00768857	0.0135677	0.012127	0.046864	3.51689e-05	0.378782	0.510491	0.0701715	0.0985628	0.0614559	96	676	17	1109	1221	709	931	16663514	CDC20	AK303844 / ENST00000310955 / ENST00000372462 / ENST00000478882 / ENST00000482046 / NM_001255	mitotic cell cycle / cell cycle / mitosis / mitotic spindle assembly checkpoint / positive regulation of cell proliferation / protein ubiquitination / anaphase-promoting complex-dependent proteasomal ubiquitin-dependent protein catabolic process / positive regulation of synaptic plasticity / regulation of meiosis / regulation of dendrite development / cell division / negative regulation of ubiqui…	spindle pole/nucleoplasm/anaphase-promoting complex/centrosome/spindle/cytosol/perinuclear region of cytoplasm/cytoplasm/microtubule organizing center/cytoskeleton/protein complex	protein binding/protein C-terminus binding/enzyme binding
PTRF	0.238749	333	268	2	PTRF	FALSE	TRUE	TRUE	FALSE	TRUE	TRUE	TRUE	FALSE	FALSE	0.124514	0.0495333	0.00342389	11.5797	0.0251062	0.0370692	0.00295336	0.0104854	0.0113987	0.00126642	0.0196752	0.00279845	0.884595	0.165049	0.0658224	97	268	133	298	53	1439	1067	16845158	PTRF	BC066123 / ENST00000357037 / NM_012232	regulation of transcription, DNA-dependent / transcription from RNA polymerase I promoter / transcription initiation from RNA polymerase I promoter / termination of RNA polymerase I transcription / gene expression / transcription, DNA-dependent / DNA-dependent transcription, termination	nucleus/nucleoplasm/cytoplasm/mitochondrion/endoplasmic reticulum/cytosol/caveola/plasma membrane/membrane/intracellular membrane-bounded organelle	protein binding/rRNA primary transcript binding/RNA binding/rRNA binding
KRTAP2-3	0.238725	362	393	0	KRTAP2 3	FALSE	TRUE	TRUE	FALSE	TRUE	TRUE	FALSE	FALSE	FALSE	0	0.0838994	0.00834718	6.84261	0.0550815	0.0134246	0.00848258	0.0131895	0.000251091	0.0263981	0.000444953	0.17532	0.27604	0.0704616	0.0658437	98	50	393	22	903	1008	842	16844585	KRTAP2-3 / KRTAP2-4	BC012486 / ENST00000391418 / ENST00000570303 / NM_001165252	NA	keratin filament/intermediate filament	NA
HIST1H4D	0.238357	305	242	0	HIST1H4D	FALSE	TRUE	TRUE	FALSE	TRUE	FALSE	TRUE	TRUE	TRUE	0	0.0711993	0.0141757	9.11237	0.00763626	0.0422666	0.01509	0.0189983	0.000951514	0.00576533	0.407591	0.00129436	0.0466543	0.0116991	0.0661777	99	83	242	1130	20	617	268	17016383	HIST1H4A / HIST1H4B / HIST1H4C / HIST1H4D / HIST1H4E / HIST1H4F / HIST1H4H / HIST1H4I / HIST1H4J / HIST1H4K / HIST1H4L / HIST2H4A / HIST2H4B / HIST4H4	BC128104 / ENST00000340756 / NM_003539	telomere maintenance / chromatin organization / nucleosome assembly / CENP-A containing nucleosome assembly at centromere / negative regulation of megakaryocyte differentiation / phosphatidylinositol-mediated signaling / DNA-dependent transcription, initiation	nucleosome/extracellular region/nucleus/nucleoplasm/chromosome/nucleolus/actin cytoskeleton	DNA binding/protein binding/protein heterodimerization activity
EPHA2	0.236844	542	435	41	EPHA2	FALSE	TRUE	TRUE	FALSE	FALSE	TRUE	FALSE	TRUE	TRUE	0.423618	0.0431389	0.00731145	3.65457	0.0447546	0.015551	0.0174265	0.0193913	0.0249198	0.259241	0.00140807	0.116305	0.0252282	0.0104026	0.0675711	100	435	774	48	792	410	245	16682098	EPHA2	BC037166 / ENST00000358432 / ENST00000462805 / ENST00000480202 / NM_004431	skeletal system development / angiogenesis / vasculogenesis / osteoblast differentiation / cell adhesion / multicellular organismal development / intrinsic apoptotic signaling pathway in response to DNA damage / regulation of lamellipodium assembly / notochord formation / neural tube development / neuron differentiation / keratinocyte differentiation / osteoclast differentiation / activation of R…	plasma membrane/integral to plasma membrane/focal adhesion/leading edge membrane/lamellipodium membrane/ruffle membrane/membrane/integral to membrane/cell junction/cell projection	transmembrane receptor protein tyrosine kinase activity/ephrin receptor activity/protein binding/ATP binding/nucleotide binding/protein kinase activity/protein tyrosine kinase activity/kinase activity/transferase activity/transferase activity, transferring phosphorus-containing groups
MCL1	0.236771	476	368	23	MCL1	FALSE	TRUE	TRUE	FALSE	TRUE	TRUE	FALSE	FALSE	FALSE	0.360193	0.0596846	0.00487595	7.03828	0.0304415	0.00798924	0.00362268	0.00658534	0.00344281	0.0230424	0.0089522	0.484802	0.809959	0.513153	0.067639	101	144	368	158	1200	1391	1403	16692775	MCL1	BC017197 / ENST00000307940 / ENST00000369026 / ENST00000464132 / NM_001197320 / NM_021960 / NM_182763	cell fate determination / apoptotic process / multicellular organismal development / cellular homeostasis / response to cytokine stimulus / execution phase of apoptosis / negative regulation of execution phase of apoptosis / negative regulation of anoikis / regulation of response to DNA damage stimulus / negative regulation of extrinsic apoptotic signaling pathway in absence of ligand / cell diff…	nucleus/nucleoplasm/cytoplasm/mitochondrion/mitochondrial outer membrane/mitochondrial matrix/membrane/integral to membrane/Bcl-2 family protein complex	protein binding/protein channel activity/protein heterodimerization activity/BH3 domain binding
RNY3P7	0.236747	557	625	0	RNY3P7	FALSE	TRUE	TRUE	FALSE	FALSE	FALSE	TRUE	TRUE	TRUE	0	0.113249	0.0130616	2.94025	0.00576803	0.0266397	0.0149867	0.0161606	1.56195e-05	0.421501	0.56702	0.0152155	0.0479562	0.0277815	0.0676616	102	19	943	1261	238	625	490	16775583	RNY3P7	ENST00000384073 / uc021rkt.1	NA	NA	NA
ICAM1	0.236422	766	625	122	ICAM1	FALSE	FALSE	FALSE	FALSE	TRUE	TRUE	TRUE	FALSE	FALSE	0.545401	0.0259663	0.00791822	8.18033	0.0193804	0.02332	0.00404967	0.00853896	0.211066	0.0106082	0.0493051	0.0272893	0.757002	0.2985	0.0679649	103	1226	281	625	383	1366	1254	16858137	ICAM1	ENST00000264832 / M24283 / NM_000201	ovarian follicle development / regulation of leukocyte mediated cytotoxicity / response to amphetamine / T cell activation via T cell receptor contact with antigen bound to MHC molecule on antigen presenting cell / T cell antigen processing and presentation / positive regulation of cellular extravasation / cell adhesion / heterophilic cell-cell adhesion / leukocyte cell-cell adhesion / cell aging…	immunological synapse/extracellular space/plasma membrane/integral to plasma membrane/external side of plasma membrane/cell surface/membrane/integral to membrane	receptor activity/transmembrane signaling receptor activity/integrin binding/protein binding/viral receptor activity/protein complex binding/cell surface binding
TP63	0.236092	730	1175	42	TP63	FALSE	FALSE	FALSE	FALSE	TRUE	FALSE	FALSE	TRUE	TRUE	0.426285	0.027876	0.00348448	10.9392	0.00642338	0.00809691	0.0219636	0.0183575	0.167346	0.00185238	0.506449	0.475822	0.00803843	0.0141864	0.0682748	104	1175	157	1205	1193	179	300	16949537	TP63	AB010153 / AB016072 / AB016073 / AB042841 / AF075428 / AF075429 / AF075430 / AF075431 / AF075432 / AF075433 / AF091627 / AF116771 / AK304127 / BC039815 / ENST00000264731 / ENST00000320472 / ENST00000354600 / ENST00000382063 / ENST00000392460 / ENST00000392461 / ENST00000392463 / ENST00000418709 / ENST00000434928 / ENST00000437221 / ENST00000440651 / ENST00000449992 / ENST00000456148 / ENST0000046…	negative regulation of transcription from RNA polymerase II promoter / skeletal system development / establishment of planar polarity / positive regulation of mesenchymal cell proliferation / epithelial cell development / chromatin remodeling / apoptotic process / induction of apoptosis / DNA damage response, signal transduction by p53 class mediator resulting in transcription of p21 class mediat…	chromatin/nuclear chromatin/nucleus/nucleoplasm/transcription factor complex/nucleolus/cytoplasm/Golgi apparatus/cytosol/dendrite/ [WARNING: THIS FIELD TRUNCATED]	RNA polymerase II core promoter proximal region sequence-specific DNA binding transcription factor activity involved in positive regulation of transcription/p53 binding/DNA binding/chromatin binding/damaged DNA binding/double-stranded DNA binding/sequence-specific DNA binding transcription factor activity/protein binding/identical protein binding/sequence-specific DNA binding/transcription regula…
WISP2	0.235781	622	613	2	WISP2	FALSE	FALSE	FALSE	FALSE	TRUE	FALSE	TRUE	TRUE	TRUE	0.124514	0.0287584	0.00387856	14.6539	0.00467263	0.0200449	0.032526	0.0281247	0.150141	0.000229159	0.677369	0.0496355	0.000729687	0.0008961	0.0685684	105	1148	61	1332	613	25	33	16914084	WISP2	AF074604 / AF083500 / AF100780 / AK074695 / AK129660 / AY358915 / BC017782 / BC058074 / BC064379 / ENST00000190983 / ENST00000372865 / ENST00000372868 / ENST00000465000 / ENST00000471629 / ENST00000497421 / GENSCAN00000043531 / NM_003881 / OTTHUMT00000080484 / OTTHUMT00000127824 / OTTHUMT00000127825 / OTTHUMT00000127826 / OTTHUMT00000127827 / OTTHUMT00000127828 / uc002xmo.1 / uc002xmp.3 / uc002xm…	regulation of cell growth / cell adhesion / signal transduction / cell-cell signaling / negative regulation of cell proliferation	extracellular space/plasma membrane/extracellular region/cytoplasm/cell surface	insulin-like growth factor binding/protein binding
FOSB	0.235265	535	638	14	FOSB	FALSE	TRUE	TRUE	FALSE	FALSE	TRUE	FALSE	FALSE	FALSE	0.306924	0.075872	0.00630449	4.55519	0.0343587	0.00380915	0.00667027	0.00850079	0.000576933	0.135864	0.00521126	0.874107	0.43645	0.301875	0.0690575	106	69	638	112	1437	1148	1260	16863287	FOSB	ENST00000353609 / ENST00000417353 / ENST00000586113 / ENST00000587358 / L49169 / NM_001114171 / NM_006732	negative regulation of transcription from RNA polymerase II promoter / multicellular organismal development / behavior / cellular response to calcium ion / regulation of transcription, DNA-dependent	nucleus	DNA binding/sequence-specific DNA binding transcription factor activity/transcription factor binding/sequence-specific DNA binding
MIR644A	0.235055	623	652	0	MIR644A	FALSE	TRUE	TRUE	FALSE	FALSE	TRUE	FALSE	FALSE	TRUE	0	0.113394	0.0148445	1.93507	0.0260579	0.0193602	0.0132821	0.0153597	1.54206e-05	0.746335	0.0170184	0.0563939	0.0757956	0.0356327	0.0692575	107	18	1305	260	652	722	588	16912939	MIR644A	hsa-mir-644a / NR_030374	NA	NA	NA
CBWD1	0.234794	327	321	0	CBWD1	FALSE	TRUE	TRUE	FALSE	TRUE	TRUE	TRUE	FALSE	FALSE	0	0.0801172	0.00592649	7.67591	0.0452116	0.0241651	0.00356834	0.0104714	0.00037001	0.0148859	0.00133431	0.0234681	0.816466	0.165771	0.0695077	108	61	321	47	355	1396	1070	16884703	CBWD1 / CBWD2 / CBWD3 / CBWD5 / CBWD6 / CBWD7 / LOC100653334 / LOC101060578	AF212253 / AF257330 / AF452722 / AK225251 / AK290072 / AK290648 / AK292585 / AK293173 / AK297292 / AK297912 / AK303653 / AK315855 / AY320414 / AY343910 / AY343911 / AY344633 / BC005996 / BC009573 / BC013432 / BC067803 / BC069006 / BC120991 / BC120992 / BC132759 / BC141856 / ENST00000259199 / ENST00000314367 / ENST00000356521 / ENST00000358604 / ENST00000360171 / ENST00000377342 / ENST00000377344 …	NA	NA	ATP binding/nucleotide binding
KDR	0.23398	758	1095	85	KDR	FALSE	FALSE	FALSE	FALSE	TRUE	FALSE	FALSE	TRUE	TRUE	0.504845	0.0304024	0.00788295	8.01382	0.00351909	0.00845589	0.0249709	0.0204307	0.122472	0.0118554	0.798362	0.446736	0.00391443	0.00764721	0.0702935	109	1095	294	1386	1170	100	193	16976029	KDR	AF035121 / ENST00000263923 / ENST00000509309 / ENST00000512566 / NM_002253	angiogenesis / ovarian follicle development / vasculogenesis / positive regulation of protein phosphorylation / positive regulation of endothelial cell proliferation / lymph vessel development / cell migration involved in sprouting angiogenesis / positive regulation of mesenchymal cell proliferation / endothelium development / transmembrane receptor protein tyrosine kinase signaling pathway / pos…	extracellular region/nucleus/endosome/early endosome/Golgi apparatus/plasma membrane/integral to plasma membrane/external side of plasma membrane/cytoplasmic membrane-bounded vesicle/membrane raft/cytoplasm/membrane/integral to membrane/cell junction/cytoplasmic vesicle/cell periphery	protein tyrosine kinase activity/transmembrane receptor protein tyrosine kinase activity/receptor signaling protein tyrosine kinase activity/vascular endothelial growth factor-activated receptor activity/integrin binding/protein binding/ATP binding/growth factor binding/vascular endothelial growth factor binding/Hsp90 protein binding/nucleotide binding/protein kinase activity/kinase activity/tran…
SDPR	0.233885	284	257	1	SDPR	FALSE	TRUE	TRUE	FALSE	TRUE	TRUE	TRUE	FALSE	TRUE	0.0785596	0.0500672	0.00391427	10.8299	0.0226734	0.0376327	0.0110725	0.0164659	0.0106877	0.0019783	0.0287846	0.00256846	0.137966	0.0252796	0.0703861	110	257	162	411	46	838	455	16906615	SDPR	AK290378 / ENST00000304141 / NM_004657	NA	cytoplasm/Golgi apparatus/cytosol/plasma membrane/caveola/membrane	phosphatidylserine binding/protein binding/phospholipid binding/lipid binding
SNORA60	0.233848	582	263	0	SNORA60	FALSE	TRUE	TRUE	FALSE	FALSE	FALSE	TRUE	TRUE	TRUE	0	0.102499	0.0280466	2.10949	0.00700785	0.0260207	0.0295136	0.0270559	4.13211e-05	0.686294	0.456606	0.0169373	0.00139625	0.0011904	0.0704212	111	26	1231	1160	263	42	41	16913572	SNORA60	AK091209 / NR_002986	NA	NA	NA
CCNE2	0.233213	757	1305	2	CCNE2	FALSE	FALSE	FALSE	FALSE	TRUE	FALSE	FALSE	TRUE	TRUE	0.124514	0.0217965	0.00401444	18.8725	0.00452027	0.0064579	0.0266357	0.0214298	0.343405	2.85204e-05	0.693332	0.623784	0.00266246	0.00571233	0.0710422	112	1348	15	1341	1305	78	155	17079293	CCNE2	AF091433 / AF102778 / AF106690 / AF112857 / BC007015 / BC020729 / ENST00000308108 / ENST00000396133 / ENST00000517487 / ENST00000519889 / ENST00000520509 / ENST00000521809 / ENST00000523476 / ENST00000524224 / GENSCAN00000001916 / NM_057749 / OTTHUMT00000379808 / OTTHUMT00000379809 / OTTHUMT00000379810 / OTTHUMT00000379811 / OTTHUMT00000379812 / OTTHUMT00000379813 / OTTHUMT00000379814 / OTTHUMT00…	cell cycle checkpoint / regulation of cyclin-dependent protein serine/threonine kinase activity / G1/S transition of mitotic cell cycle / mitotic cell cycle / DNA replication initiation / cell division / cell cycle / regulation of cell cycle	nucleoplasm/cytosol/nucleus	protein binding/cyclin-dependent protein serine/threonine kinase regulator activity/protein kinase binding
NAB2	0.232922	512	331	4	NAB2	FALSE	FALSE	FALSE	FALSE	TRUE	TRUE	TRUE	TRUE	TRUE	0.18241	0.0327611	0.00952737	7.48596	0.0619966	0.0218532	0.0231648	0.0261822	0.0912234	0.0169383	0.000219697	0.0355805	0.00600836	0.00150635	0.0713282	113	992	331	15	480	145	54	16752703	NAB2	BC065931 / ENST00000300131 / ENST00000342556 / ENST00000357680 / ENST00000554839 / NM_005967	endochondral ossification / transcription, DNA-dependent / nervous system development / cell proliferation / Schwann cell differentiation / negative regulation of transcription from RNA polymerase III promoter / myelination / regulation of epidermis development / regulation of transcription, DNA-dependent / negative regulation of transcription, DNA-dependent	nucleus	transcription corepressor activity/transcription factor binding
MIR221	0.232751	223	157	0	MIR221	FALSE	TRUE	TRUE	FALSE	TRUE	TRUE	TRUE	FALSE	TRUE	0	0.0581113	0.00578109	9.31948	0.0381317	0.0341412	0.0140471	0.0194031	0.00412877	0.0050491	0.00317716	0.00440939	0.0616749	0.010366	0.0714974	114	157	232	78	79	679	244	17110365	MIR221	hsa-mir-221 / NR_029635	NA	NA	NA
FANCB	0.23186	800	1083	35	FANCB	FALSE	FALSE	FALSE	FALSE	TRUE	FALSE	FALSE	TRUE	TRUE	0.406147	0.01016	0.00716121	15.1599	0.0084518	0.0086474	0.017426	0.0152151	0.909708	0.000175874	0.350949	0.431771	0.0252316	0.0372783	0.0723843	115	1467	51	1083	1156	411	614	17109211	FANCB	BC136558 / ENST00000324138 / ENST00000398334 / ENST00000452869 / ENST00000489126 / NM_001018113 / NM_152633	DNA repair / response to DNA damage stimulus	nucleoplasm/Fanconi anaemia nuclear complex/nucleus	protein binding
ZYX	0.231448	386	304	4	ZYX	FALSE	TRUE	TRUE	FALSE	TRUE	TRUE	FALSE	FALSE	FALSE	0.18241	0.0476407	0.00477062	11.4011	0.0375351	0.00974306	0.0086104	0.0112096	0.0143384	0.00140683	0.00343019	0.353642	0.266943	0.131591	0.0727974	116	304	136	83	1074	995	1010	17052823	ZYX	AK298925 / AK299005 / AK302309 / AK316227 / BC006532 / BC008743 / BC009360 / BC010031 / BC021039 / CR457431 / ENST00000322764 / ENST00000354434 / ENST00000392910 / ENST00000446634 / ENST00000449423 / ENST00000449630 / ENST00000457235 / ENST00000468083 / ENST00000497119 / GENSCAN00000038681 / NM_001010972 / NM_003461 / OTTHUMT00000156296 / OTTHUMT00000156297 / OTTHUMT00000156298 / OTTHUMT000001562…	cell adhesion / signal transduction / cell-cell signaling / virus-host interaction	stress fiber/nucleus/cytoplasm/plasma membrane/integral to plasma membrane/cell-cell adherens junction/focal adhesion/cytoskeleton/cell junction	protein binding/zinc ion binding/metal ion binding
EBP	0.230403	658	908	42	EBP	FALSE	TRUE	FALSE	FALSE	TRUE	FALSE	TRUE	FALSE	FALSE	0.426285	0.0342519	0.00414586	9.25329	0.0108912	0.0248834	0.00572817	0.00935096	0.0756689	0.00526717	0.223059	0.0206673	0.543234	0.234059	0.0738591	117	908	236	936	321	1233	1164	17103327	EBP	BC001549 / BC001572 / BC046501 / CR456815 / CR542094 / ENST00000276096 / ENST00000414061 / ENST00000446158 / ENST00000466461 / ENST00000495186 / ENST00000498425 / ENST00000594677 / ENST00000597879 / ENST00000598515 / ENST00000598584 / ENST00000599607 / ENST00000600384 / GENSCAN00000041100 / GENSCAN00000052120 / NM_006579 / OTTHUMT00000083369 / OTTHUMT00000083370 / OTTHUMT00000083371 / OTTHUMT0000…	skeletal system development / cholesterol biosynthetic process / drug transmembrane transport / cholesterol metabolic process / hemopoiesis / small molecule metabolic process / sterol metabolic process / sterol biosynthetic process / lipid metabolic process / steroid biosynthetic process / steroid metabolic process	endoplasmic reticulum/endoplasmic reticulum membrane/integral to plasma membrane/integral to membrane/intracellular membrane-bounded organelle/membrane	C-8 sterol isomerase activity/steroid delta-isomerase activity/transmembrane signaling receptor activity/drug transmembrane transporter activity/cholestenol delta-isomerase activity/isomerase activity
FANCI	0.229607	725	1150	1	FANCI	FALSE	FALSE	FALSE	FALSE	TRUE	FALSE	FALSE	TRUE	TRUE	0.0785596	0.028729	0.00690105	19.9554	0.000303964	0.00562686	0.020614	0.0164236	0.150686	1.73986e-05	0.998063	0.705086	0.011214	0.025612	0.0746782	118	1150	12	1469	1352	222	460	16804559	FANCI	AB058697 / BC004277 / BC140769 / BC144483 / BC146804 / EF469766 / EF567077 / ENST00000300027 / ENST00000310775 / ENST00000447611 / ENST00000451393 / ENST00000561894 / ENST00000563250 / ENST00000564350 / ENST00000565255 / ENST00000566615 / ENST00000566895 / ENST00000567996 / ENST00000570225 / GENSCAN00000036694 / NM_001113378 / NM_018193 / OTTHUMT00000256568 / OTTHUMT00000421140 / OTTHUMT000004211…	DNA repair / cell cycle / positive regulation of protein ubiquitination / response to DNA damage stimulus	nucleus/nucleoplasm/plasma membrane	DNA binding/protein binding
HMGA1	0.229364	553	804	7	HMGA1	FALSE	TRUE	FALSE	FALSE	TRUE	FALSE	TRUE	FALSE	FALSE	0.235679	0.0359639	0.00645131	13.0483	0.0114548	0.0215709	0.0103235	0.0122924	0.0610344	0.000547046	0.200908	0.0374629	0.16897	0.0935471	0.07493	119	804	96	904	494	882	917	17117871	HMGA1	BT006774	DNA unwinding involved in replication / base-excision repair / nucleosome disassembly / transcription, DNA-dependent / regulation of transcription, DNA-dependent / protein complex assembly / negative regulation of cell proliferation / response to virus / viral reproduction / viral reproductive process / negative regulation of chromatin silencing / senescence-associated heterochromatin focus assem…	nucleus/nucleoplasm/transcription factor complex/cytosol/senescence-associated heterochromatin focus/chromatin/chromosome	DNA binding/AT DNA binding/sequence-specific DNA binding transcription factor activity/DNA-(apurinic or apyrimidinic site) lyase activity/protein binding/transcription factor binding/enzyme binding/ligand-dependent nuclear receptor transcription coactivator activity/retinoic acid receptor binding/peroxisome proliferator activated receptor binding/retinoid X receptor binding/5'-deoxyribose-5-phosp…
MUC15	0.229324	674	609	2	MUC15	FALSE	FALSE	FALSE	FALSE	TRUE	FALSE	TRUE	TRUE	TRUE	0.124514	0.0266176	0.00672199	17.342	0.0037899	0.0200731	0.0176163	0.0168736	0.195097	5.89e-05	0.770251	0.0493758	0.0240167	0.022297	0.0749716	120	1206	26	1371	609	391	412	16736764	MUC15	AY358668 / ENST00000281268 / ENST00000436318 / ENST00000455601 / ENST00000527569 / ENST00000529533 / NM_001135091 / NM_001135092 / NM_145650	O-glycan processing / post-translational protein modification / cellular protein metabolic process	extracellular region/Golgi lumen/plasma membrane/integral to membrane/membrane	NA
CP	0.228944	774	935	120	CP	FALSE	FALSE	FALSE	FALSE	TRUE	FALSE	FALSE	TRUE	TRUE	0.543543	0.0308	0.00637883	6.29343	0.0062454	0.0127095	0.0213376	0.0186419	0.116558	0.0388334	0.522424	0.201273	0.00937346	0.0130205	0.0753682	121	1079	458	1221	935	196	283	16960304	CP	AK291219 / AK299272 / AK309279 / BC142714 / BC146663 / BX647327 / ENST00000264613 / ENST00000460674 / ENST00000463556 / ENST00000471356 / ENST00000479771 / ENST00000481169 / ENST00000489736 / ENST00000490639 / ENST00000494544 / ENST00000497902 / GENSCAN00000015967 / M13699 / NM_000096 / NR_046371 / OTTHUMT00000317498 / OTTHUMT00000317513 / OTTHUMT00000356159 / OTTHUMT00000356251 / OTTHUMT00000356…	copper ion transport / cellular iron ion homeostasis / transmembrane transport / transport / ion transport / oxidation-reduction process	extracellular region/extracellular space	ferroxidase activity/copper ion binding/chaperone binding/oxidoreductase activity/metal ion binding
MIR4451	0.228403	524	539	0	MIR4451	FALSE	TRUE	TRUE	FALSE	FALSE	FALSE	TRUE	TRUE	TRUE	0	0.0937398	0.00897319	2.96736	0.00588699	0.0472973	0.0159161	0.0203105	9.47112e-05	0.414124	0.555677	0.000638723	0.0374724	0.0079225	0.0759358	122	36	936	1250	10	539	201	16968521	MIR4451	hsa-mir-4451 / NR_039656	NA	NA	NA
TUFT1	0.228053	388	308	0	TUFT1	FALSE	TRUE	TRUE	FALSE	TRUE	TRUE	FALSE	FALSE	FALSE	0	0.086282	0.00380583	7.89758	0.0423669	0.00592248	0.00806247	0.0105645	0.000197424	0.0128171	0.00187405	0.675973	0.307911	0.161031	0.0763063	123	47	308	58	1336	1034	1062	16670894	TUFT1	AF254260 / ENST00000353024 / ENST00000368848 / ENST00000368849 / ENST00000461859 / ENST00000490156 / ENST00000498606 / ENST00000538902 / NM_001126337 / NM_020127	bone mineralization / odontogenesis / biomineral tissue development	extracellular region/cytoplasm	structural constituent of tooth enamel/protein binding
GBP2	0.225826	366	410	0	GBP2	FALSE	TRUE	TRUE	FALSE	TRUE	TRUE	FALSE	FALSE	FALSE	0	0.087372	0.00610698	6.70996	0.0378089	0.0113217	0.0106562	0.0130298	0.000177028	0.0289606	0.00331139	0.2627	0.154438	0.0741057	0.078704	124	43	410	81	996	862	863	16689354	GBP2	AK122866 / AL832451 / BC022272 / BC073163 / CR457062 / ENST00000370466 / ENST00000463660 / ENST00000464839 / ENST00000493802 / GENSCAN00000041877 / M55543 / NM_004120 / OTTHUMT00000029405 / OTTHUMT00000029406 / OTTHUMT00000029407 / OTTHUMT00000029408 / uc001dmy.1 / uc001dmz.1	immune response / cytokine-mediated signaling pathway / interferon-gamma-mediated signaling pathway / type I interferon-mediated signaling pathway / GTP catabolic process	Golgi membrane/nucleus/cytosol/cytoplasm/Golgi apparatus/membrane	GTPase activity/GTP binding/nucleotide binding
GINS2	0.225569	690	759	0	GINS2	FALSE	FALSE	FALSE	FALSE	TRUE	FALSE	FALSE	TRUE	TRUE	0	0.0228838	0.0025488	20.4284	0.00504069	0.0162164	0.021894	0.0195433	0.303522	1.40844e-05	0.639281	0.102349	0.00817647	0.00994233	0.0789864	125	1311	11	1308	759	181	234	16828886	GINS2	BC010164 / ENST00000253462 / NM_016095	mitotic cell cycle / DNA strand elongation involved in DNA replication / S phase of mitotic cell cycle / DNA replication	nucleoplasm/nucleus	protein binding
LAMB3	0.224566	398	535	2	LAMB3	FALSE	TRUE	TRUE	FALSE	TRUE	TRUE	FALSE	FALSE	FALSE	0.124514	0.0409468	0.00656004	12.5481	0.0286943	0.0198727	0.0112549	0.0141445	0.0327148	0.000724555	0.0115078	0.0512507	0.131309	0.0521448	0.0800972	126	535	109	195	629	827	748	16698883	LAMB3	BC075838 / ENST00000356082 / ENST00000367030 / ENST00000391911 / ENST00000415782 / ENST00000455193 / NM_000228 / NM_001017402 / NM_001127641	cell adhesion / epidermis development / extracellular matrix organization / hemidesmosome assembly / cell junction assembly / brown fat cell differentiation	extracellular region/laminin-5 complex/proteinaceous extracellular matrix/basement membrane	structural molecule activity/protein binding
TMEM158	0.224531	379	170	0	TMEM158	FALSE	TRUE	TRUE	FALSE	FALSE	TRUE	TRUE	TRUE	TRUE	0	0.0568497	0.00585425	3.81985	0.0199766	0.0661325	0.0268539	0.0328273	0.0047813	0.230643	0.0446366	6.0431e-05	0.00253297	0.000269778	0.0801363	127	170	748	581	2	72	15	16952782	TMEM158	AF438313 / ENST00000503771 / NM_015444	NA	integral to membrane/membrane	peptide binding
LOC340340	0.224377	277	151	0	LOC340340	FALSE	TRUE	TRUE	FALSE	TRUE	TRUE	TRUE	FALSE	TRUE	0	0.0633558	0.0028354	6.74727	0.0524753	0.0299764	0.0129765	0.0191014	0.00226583	0.0282145	0.00058804	0.00865177	0.0823226	0.0113435	0.0803078	128	118	407	26	151	740	258	17050126	LOC340340	BC040593 / n369831 / TCONS_00013558-XLOC_006200	NA	NA	NA
CD53	0.223341	510	424	3	CD53	FALSE	FALSE	FALSE	FALSE	TRUE	FALSE	TRUE	TRUE	TRUE	0.157119	0.0365358	0.00488872	11.8589	0.00231272	0.0226926	0.027981	0.0249606	0.0568068	0.00107594	0.911268	0.0305525	0.00196266	0.00210383	0.0814756	129	769	123	1432	424	56	69	16668582	CD53	AK298723 / BC040693 / BT019643 / ENST00000271324 / ENST00000429072 / ENST00000464329 / ENST00000468160 / ENST00000471220 / ENST00000476408 / ENST00000497404 / GENSCAN00000007198 / M37033 / M60871 / NM_000560 / NM_001040033 / OTTHUMT00000032931 / OTTHUMT00000098106 / OTTHUMT00000098107 / OTTHUMT00000098108 / OTTHUMT00000098109 / uc001dzw.3 / uc001dzx.3 / uc010owa.2	signal transduction / positive regulation of myoblast fusion	immunological synapse/plasma membrane/cell surface/integral to membrane/cell-cell junction/membrane	protein binding
SRM	0.223004	775	1099	14	SRM	FALSE	FALSE	FALSE	FALSE	TRUE	FALSE	FALSE	TRUE	FALSE	0.306924	0.0247513	0.00329348	14.5887	0.00823214	0.00582257	0.0156711	0.0134098	0.244045	0.000237192	0.36545	0.685803	0.0399807	0.0657283	0.0818594	130	1262	63	1099	1344	561	814	16681611	SRM	BC033106 / ENST00000376957 / ENST00000459997 / NM_003132	polyamine metabolic process / spermidine biosynthetic process / cellular nitrogen compound metabolic process / small molecule metabolic process / metabolic process	cytosol	spermidine synthase activity/protein homodimerization activity/catalytic activity/transferase activity
SFTPA1	0.2224	468	551	4	SFTPA1	FALSE	FALSE	FALSE	FALSE	TRUE	TRUE	FALSE	TRUE	TRUE	0.18241	0.0371885	0.0118612	8.48496	0.0203127	0.0199295	0.0333824	0.0300511	0.0523406	0.00867131	0.0422193	0.0507117	0.000609625	0.000542834	0.0825526	131	731	272	551	627	21	25	16706522	SFTPA1	ENST00000372308 / ENST00000372313 / ENST00000394569 / ENST00000398636 / ENST00000428376 / JX502764 / NM_001093770 / NM_001164644 / NM_001164645 / NM_001164646 / NM_001164647 / NM_005411	lipid transport / respiratory gaseous exchange	extracellular region/collagen/extracellular space/proteinaceous extracellular matrix	lipid transporter activity/carbohydrate binding
DKK1	0.2222	525	533	14	DKK1	FALSE	TRUE	TRUE	FALSE	FALSE	TRUE	TRUE	FALSE	TRUE	0.306924	0.0557843	0.00797748	3.08408	0.046419	0.0210429	0.00970535	0.0146544	0.00541595	0.38348	0.00115905	0.0412724	0.199558	0.0444275	0.0827822	132	177	901	42	533	920	689	16705011	DKK1	AF127563 / AF177394 / AY359005 / BC001539 / ENST00000373970 / ENST00000467359 / ENST00000476752 / ENST00000494277 / GENSCAN00000023280 / JN966744 / NM_012242 / OTTHUMT00000048098 / OTTHUMT00000048099 / OTTHUMT00000048100 / OTTHUMT00000048101 / uc001jjr.3	negative regulation of transcription from RNA polymerase II promoter / cell morphogenesis involved in differentiation / endoderm formation / mesoderm formation / hair follicle development / regulation of receptor internalization / embryonic limb morphogenesis / negative regulation of BMP signaling pathway / forebrain development / negative regulation of protein complex assembly / response to reti…	extracellular space/plasma membrane/extracellular region	signal transducer activity/protein binding/growth factor activity/receptor antagonist activity/low-density lipoprotein particle receptor binding
BDNF	0.220886	735	599	187	BDNF	FALSE	TRUE	TRUE	FALSE	FALSE	TRUE	FALSE	FALSE	FALSE	0.593485	0.0418869	0.0059009	5.40967	0.0196689	0.00288906	0.00322184	0.00453697	0.0291047	0.0731198	0.0469829	0.939191	0.856251	0.798018	0.0843155	133	487	560	599	1453	1420	1467	16736861	BDNF	AF400438 / AK289763 / AK289853 / AY054392 / AY054393 / AY054394 / AY054395 / AY054396 / AY054397 / AY054398 / AY054399 / AY054400 / AY054406 / AY656701 / BC029795 / EF674517 / EF674518 / EF674519 / EF674520 / EF674521 / EF689009 / EF689010 / EF689011 / EF689012 / EF689013 / EF689014 / EF689015 / EF689016 / EF689017 / EF689018 / EF689019 / EF689020 / EF689021 / ENST00000314915 / ENST00000356660 / …	ureteric bud development / response to hypoxia / chronic inflammatory response / mitochondrial electron transport, NADH to ubiquinone / nervous system development / negative regulation of neuroblast proliferation / axon guidance / axon target recognition / learning or memory / feeding behavior / neuron recognition / response to hormone stimulus / glutamate secretion / response to fluoxetine / den…	extracellular region/cytoplasm/synaptic vesicle/perinuclear region of cytoplasm/cytoplasmic membrane-bounded vesicle	neurotrophin TRKB receptor binding/growth factor activity/receptor binding/protein binding
RASD1	0.220472	522	697	2	RASD1	FALSE	TRUE	TRUE	FALSE	FALSE	TRUE	FALSE	FALSE	FALSE	0.124514	0.0908694	0.010798	4.08446	0.0351158	0.0100543	0.00442198	0.00791852	0.000125255	0.1909	0.00470935	0.333751	0.709152	0.357396	0.0848045	134	37	697	105	1051	1337	1307	16841907	RASD1	AF069506 / ENST00000225688 / NM_001199989 / NM_016084	signal transduction / G-protein coupled receptor signaling pathway / nitric oxide mediated signal transduction / small GTPase mediated signal transduction / negative regulation of transcription, DNA-dependent / GTP catabolic process / intracellular protein transport / nucleocytoplasmic transport / protein transport	nucleus/plasma membrane/perinuclear region of cytoplasm/cytoplasm/membrane/intracellular	GTPase activity/GTP binding/nucleotide binding/protein binding
TMEM45B	0.22005	728	717	0	TMEM45B	FALSE	FALSE	FALSE	FALSE	TRUE	FALSE	FALSE	TRUE	TRUE	0	0.0134344	0.00734979	22.024	0.00864417	0.0173624	0.0178534	0.0170041	0.758453	7.04118e-06	0.338693	0.0822227	0.0225886	0.021421	0.0853064	135	1457	8	1071	717	372	404	16733421	TMEM45B	BC016153 / ENST00000281441 / ENST00000525709 / ENST00000527754 / ENST00000529381 / NM_138788	NA	integral to membrane/membrane	NA
DOCK11	0.219621	540	675	0	DOCK11	FALSE	TRUE	FALSE	FALSE	TRUE	FALSE	FALSE	TRUE	TRUE	0	0.0343597	0.00275322	14.9084	0.00513616	0.0184004	0.0345224	0.0293866	0.0746515	0.000200488	0.629544	0.0675393	0.000481391	0.000644321	0.0858193	136	901	54	1305	675	18	27	17106438	DOCK11	AY692226 / ENST00000276202 / ENST00000498252 / NM_144658	small GTPase mediated signal transduction / blood coagulation	cytosol	Rho guanyl-nucleotide exchange factor activity/phospholipid binding/Rho GTPase binding/guanyl-nucleotide exchange factor activity/protein binding
SNORD13P3	0.218842	593	93	0	SNORD13P3	FALSE	TRUE	TRUE	FALSE	FALSE	TRUE	TRUE	FALSE	FALSE	0	0.0953321	0.0152535	1.92149	0.0387695	0.033379	0.00677717	0.0138768	8.12439e-05	0.750953	0.00292908	0.00497606	0.425305	0.0567282	0.0867596	137	35	1309	74	93	1139	777	16953121	SNORD13P3	X58062	NA	NA	NA
RGCC	0.218507	364	822	0	RGCC	FALSE	TRUE	TRUE	FALSE	TRUE	FALSE	FALSE	FALSE	FALSE	0	0.0618219	0.00551587	13.5466	0.0102562	0.0147043	0.0112868	0.0117705	0.00269602	0.000415467	0.251023	0.13692	0.130178	0.110296	0.0871675	138	131	82	979	833	822	958	16774303	RGCC	AF036549 / ENST00000379359 / ENST00000487837 / NM_014059	negative regulation of exit from mitosis / negative regulation of endothelial cell proliferation / positive regulation of extracellular matrix constituent secretion / complement activation / negative regulation of cell proliferation / positive regulation of epithelial to mesenchymal transition / negative regulation of angiogenesis / positive regulation of cyclin-dependent protein serine/threonine…	nucleus/nucleolus/cytoplasm/centrosome/microtubule organizing center/cytoskeleton	protein binding/protein kinase binding/protein kinase activator activity/R-SMAD binding
MIRLET7A2	0.217286	341	344	0	MIRLET7A2	FALSE	TRUE	TRUE	FALSE	FALSE	TRUE	TRUE	FALSE	TRUE	0	0.0766654	0.00423206	5.44714	0.043166	0.0242635	0.0117942	0.0164867	0.000530578	0.0711679	0.00170152	0.0230616	0.113431	0.025118	0.0886715	139	67	558	54	344	795	451	16745507	MIRLET7A2	hsa-let-7a-2 / NR_029477	NA	NA	NA
PLK1	0.217136	774	1154	10	PLK1	FALSE	FALSE	FALSE	FALSE	TRUE	FALSE	FALSE	TRUE	FALSE	0.271771	0.0261818	0.0111572	14.9503	0.00711877	0.00531721	0.014938	0.0126829	0.205655	0.000196147	0.447608	0.735546	0.0485835	0.0826888	0.0888581	140	1218	53	1154	1371	632	889	16817017	PLK1	AB084459 / AB209179 / AK303263 / BC002369 / BC003002 / BC014135 / BC014846 / ENST00000300093 / ENST00000562272 / ENST00000562407 / ENST00000564202 / ENST00000564794 / ENST00000567897 / ENST00000568568 / ENST00000570220 / GENSCAN00000042709 / L19559 / NM_005030 / OTTHUMT00000214057 / OTTHUMT00000434878 / OTTHUMT00000434879 / OTTHUMT00000434880 / OTTHUMT00000434881 / OTTHUMT00000434882 / OTTHUMT000…	mitotic sister chromatid segregation / G2/M transition of mitotic cell cycle / negative regulation of transcription from RNA polymerase II promoter / mitotic cell cycle / cytokinesis / microtubule bundle formation / protein phosphorylation / mitosis / mitotic nuclear envelope disassembly / metaphase/anaphase transition of mitotic cell cycle / activation of mitotic anaphase-promoting complex activ…	kinetochore/spindle pole/condensed nuclear chromosome outer kinetochore/nucleus/nucleoplasm/centrosome/spindle/cytosol/spindle microtubule/midbody/spindle midzone/chromosome, centromeric region/condensed chromosome kinetochore/chromosome/cytoplasm/microtubule organizing center/cytoskeleton	protein kinase activity/protein serine/threonine kinase activity/protein binding/ATP binding/microtubule binding/anaphase-promoting complex binding/kinase activity/protein kinase binding/protein tyrosine kinase activity/transferase activity, transferring phosphorus-containing groups/nucleotide binding/transferase activity
GRB7	0.217047	731	842	40	GRB7	FALSE	FALSE	FALSE	FALSE	TRUE	TRUE	FALSE	FALSE	FALSE	0.420887	0.0287482	0.00307861	9.27582	0.0195744	0.0115447	0.0109683	0.0117816	0.15033	0.00519184	0.0477303	0.251748	0.141919	0.109911	0.0889692	141	1149	234	606	984	842	956	16833876	GRB7	AB008789 / AB008790 / AK290115 / AK294620 / BC006535 / BT006686 / D43772 / ENST00000309156 / ENST00000309185 / ENST00000394204 / ENST00000394209 / ENST00000394211 / ENST00000445327 / ENST00000461756 / ENST00000473071 / ENST00000485182 / ENST00000577695 / ENST00000578702 / ENST00000583813 / ENST00000584053 / ENST00000584819 / ENST00000584853 / GENSCAN00000006138 / NM_001030002 / NM_001242442 / NM_…	epidermal growth factor receptor signaling pathway / blood coagulation / negative regulation of translation / positive regulation of cell migration / stress granule assembly / leukocyte migration / signal transduction	cytosol/plasma membrane/focal adhesion/cytoplasmic stress granule/cell projection/cytoplasm/membrane/cell junction	RNA binding/SH3/SH2 adaptor activity/protein binding/protein kinase binding/phosphatidylinositol binding/identical protein binding/phospholipid binding/lipid binding
AURKB	0.215257	623	732	9	AURKB	FALSE	TRUE	FALSE	FALSE	TRUE	FALSE	FALSE	FALSE	FALSE	0.260969	0.0373768	0.00480416	12.7512	0.00443711	0.00997884	0.0130702	0.0118356	0.0511191	0.000646017	0.702076	0.338484	0.0802624	0.108056	0.0912307	142	723	102	1345	1056	732	951	16840902	AURKB	AB011446 / AB011450 / AB519677 / AB519678 / AB519679 / AF004022 / AF008552 / AF015254 / AK297976 / BC000442 / BC009751 / BC080581 / BT019534 / ENST00000316199 / ENST00000534871 / ENST00000535053 / ENST00000577833 / ENST00000578549 / ENST00000578753 / ENST00000580390 / ENST00000580998 / ENST00000581511 / ENST00000582368 / ENST00000583915 / ENST00000584561 / ENST00000584972 / ENST00000585124 / GENS…	negative regulation of transcription from RNA polymerase II promoter / mitotic cell cycle / negative regulation of B cell apoptotic process / protein phosphorylation / aging / cell proliferation / attachment of spindle microtubules to kinetochore / histone modification / anaphase-promoting complex-dependent proteasomal ubiquitin-dependent protein catabolic process / positive regulation of cytokin…	condensed chromosome, centromeric region/condensed nuclear chromosome, centromeric region/nucleus/spindle/cytosol/chromocenter/midbody/chromosome passenger complex/chromosome, centromeric region/chromosome/cytoplasm/cytoskeleton	protein serine/threonine kinase activity/protein serine/threonine/tyrosine kinase activity/protein binding/ATP binding/metal ion binding/nucleotide binding/protein kinase activity/kinase activity/transferase activity/transferase activity, transferring phosphorus-containing groups/protein tyrosine kinase activity
MIR31	0.214287	304	92	0	MIR31	FALSE	TRUE	TRUE	FALSE	FALSE	TRUE	TRUE	TRUE	TRUE	0	0.0683057	0.0112967	5.35599	0.0387555	0.0336863	0.0151805	0.0202294	0.00130509	0.0760122	0.00293431	0.00473867	0.0455437	0.00811425	0.0924815	143	92	563	75	89	608	205	17092879	MIR31	hsa-mir-31 / NR_029505	NA	NA	NA
ASPM	0.214174	691	778	2	ASPM	FALSE	FALSE	FALSE	FALSE	TRUE	FALSE	TRUE	FALSE	FALSE	0.124514	0.0256093	0.00670274	16.5119	0.00765898	0.021729	0.0121552	0.0133761	0.220316	8.85212e-05	0.405907	0.0363963	0.102845	0.0664304	0.0926289	144	1241	35	1127	487	778	820	16697544	ASPM	AF509326 / ENST00000294732 / ENST00000367408 / ENST00000367409 / NM_001206846 / NM_018136	neuron migration / positive regulation of neuroblast proliferation / mitosis / spermatogenesis / forebrain neuroblast division / negative regulation of neuron differentiation / negative regulation of asymmetric cell division / oogenesis / developmental growth / maintenance of centrosome location / positive regulation of canonical Wnt receptor signaling pathway / cell cycle / brain development / c…	spindle pole/nucleus/cytoplasm/midbody/spindle/cytoskeleton	calmodulin binding/protein binding/binding
FANCD2	0.213937	780	1163	3	FANCD2	FALSE	FALSE	FALSE	FALSE	TRUE	FALSE	FALSE	TRUE	TRUE	0.157119	0.0174899	0.00314553	18.2822	0.00699812	0.00760237	0.0183081	0.0155813	0.539522	3.75806e-05	0.457402	0.518016	0.0200923	0.0332554	0.092937	145	1411	18	1163	1226	345	560	16937505	FANCD2	AF230336 / AF340183 / BC013582 / BC038666 / ENST00000287647 / ENST00000383806 / ENST00000383807 / ENST00000419585 / ENST00000421731 / ENST00000431693 / ENST00000438741 / ENST00000470028 / ENST00000470757 / ENST00000480909 / GENSCAN00000005770 / NM_001018115 / NM_033084 / OTTHUMT00000250562 / OTTHUMT00000339873 / OTTHUMT00000339874 / OTTHUMT00000339875 / OTTHUMT00000339879 / OTTHUMT00000339880 / O…	DNA repair / synapsis / gamete generation / response to gamma radiation / response to DNA damage stimulus / cell cycle	condensed chromosome/nucleoplasm/nucleus	protein binding/binding
GAN	0.213787	1092	981	436	GAN	FALSE	FALSE	FALSE	FALSE	FALSE	TRUE	FALSE	TRUE	TRUE	0.689084	0.0154121	0.0144069	1.93254	0.0202089	0.0115747	0.0276489	0.0243499	0.650952	0.747197	0.0429502	0.250306	0.00211498	0.0024917	0.093134	146	1437	1306	561	981	61	81	16821280	GAN	AF291673 / ENST00000248272 / NM_022041	cell death / protein ubiquitination / biological_process	cytoplasm/neurofilament/Cul3-RING ubiquitin ligase complex/cytoskeleton	protein binding/molecular_function
NRG1	0.213169	925	993	271	NRG1	FALSE	FALSE	FALSE	FALSE	TRUE	TRUE	FALSE	FALSE	FALSE	0.635348	0.022703	0.00139156	5.98402	0.0212384	0.0113557	0.00419088	0.00680565	0.30988	0.0483942	0.0362708	0.260997	0.73897	0.484819	0.0939463	147	1317	516	486	993	1351	1385	17067696	NRG1	AK298132 / ENST00000287840 / ENST00000287842 / ENST00000287845 / ENST00000338921 / ENST00000341377 / ENST00000356819 / ENST00000405005 / ENST00000518104 / ENST00000519301 / ENST00000520407 / ENST00000520502 / ENST00000521670 / ENST00000522569 / ENST00000523079 / ENST00000523681 / ENST00000539990 / NM_001159995 / NM_001159996 / NM_001159999 / NM_001160001 / NM_001160002 / NM_001160004 / NM_0011600…	MAPK cascade / cell morphogenesis / cardiac conduction system development / ventricular trabecula myocardium morphogenesis / cell communication / transmembrane receptor protein tyrosine kinase signaling pathway / activation of transmembrane receptor protein tyrosine kinase activity / epidermal growth factor receptor signaling pathway / nervous system development / synapse assembly / peripheral ne…	extracellular region/extracellular space/nucleus/cytoplasm/integral to plasma membrane/membrane/apical plasma membrane/neuromuscular junction/plasma membrane/integral to membrane/axon/synapse	transcription cofactor activity/receptor binding/cytokine activity/ErbB-2 class receptor binding/protein binding/growth factor activity/protein tyrosine kinase activator activity/transmembrane receptor protein tyrosine kinase activator activity/receptor tyrosine kinase binding/ErbB-3 class receptor binding
CDC6	0.213004	639	633	2	CDC6	FALSE	FALSE	FALSE	FALSE	TRUE	FALSE	FALSE	TRUE	TRUE	0.124514	0.0258233	0.00597154	13.6999	0.00765273	0.0197789	0.028051	0.0249725	0.214728	0.000382105	0.40637	0.0521535	0.00193208	0.00209695	0.0941634	148	1234	78	1128	633	54	68	16834056	CDC6	AF022109 / BC025232 / ENST00000209728 / ENST00000473555 / ENST00000580824 / GENSCAN00000006077 / NM_001254 / OTTHUMT00000257129 / OTTHUMT00000257130 / OTTHUMT00000447439 / U77949 / uc002huj.1	DNA replication checkpoint / regulation of cyclin-dependent protein serine/threonine kinase activity / G1/S transition of mitotic cell cycle / regulation of transcription involved in G1/S phase of mitotic cell cycle / mitotic cell cycle / DNA replication / mitosis / traversing start control point of mitotic cell cycle / negative regulation of DNA replication / negative regulation of cell prolifer…	spindle pole/nucleus/nucleoplasm/cytoplasm/cytosol/spindle midzone/spindle	nucleotide binding/chromatin binding/protein binding/ATP binding/nucleoside-triphosphatase activity/kinase binding
KIF18B	0.211599	481	687	0	KIF18B	FALSE	TRUE	TRUE	FALSE	TRUE	FALSE	FALSE	TRUE	TRUE	0	0.0379135	0.000746598	16.3137	0.0134856	0.00837705	0.0219799	0.0190049	0.0477932	9.77158e-05	0.138338	0.45301	0.00800658	0.011676	0.0960441	149	687	36	808	1174	178	267	16845794	KIF18B	BC144271 / ENST00000339151 / ENST00000438933 / ENST00000587309 / ENST00000590129 / ENST00000593135 / NM_001264573 / NM_001265577	mitotic cell cycle / microtubule-based movement / mitosis / cell division / regulation of cell division / cell cycle	nucleus/nucleolus/cytoplasm/microtubule/microtubule associated complex/plasma membrane/cytoskeleton/kinesin complex	microtubule motor activity/ATP binding/nucleotide binding/microtubule binding
AKAP6	0.210729	492	155	0	AKAP6	FALSE	FALSE	FALSE	FALSE	TRUE	TRUE	TRUE	TRUE	TRUE	0	0.0282183	0.00389275	13.3533	0.0223232	0.0298382	0.0263918	0.0266271	0.160462	0.000462009	0.0304408	0.00885257	0.00281556	0.0013357	0.0972272	150	1168	87	429	155	81	49	16783230	AKAP6	BC137232 / BC137233 / BC150185 / BC150288 / BC154413 / ENST00000280979 / ENST00000553547 / ENST00000554410 / ENST00000554449 / ENST00000555207 / ENST00000555950 / ENST00000556638 / ENST00000557272 / ENST00000557354 / ENST00000557396 / ENST00000557708 / GENSCAN00000043666 / NM_004274 / OTTHUMT00000276617 / OTTHUMT00000409744 / OTTHUMT00000409747 / OTTHUMT00000409748 / OTTHUMT00000409749 / OTTHUMT0…	protein targeting / regulation of action potential / regulation of protein kinase A signaling cascade / regulation of release of sequestered calcium ion into cytosol by sarcoplasmic reticulum / cAMP-mediated signaling / positive regulation of cell growth / negative regulation of cAMP biosynthetic process / positive regulation of protein phosphatase type 2B activity / positive regulation of releas…	nuclear envelope/sarcoplasmic reticulum/nuclear membrane/calcium channel complex/nucleus/cytoplasm/caveola/junctional sarcoplasmic reticulum membrane/intercalated disc/membrane/T-tubule/perinuclear region of cytoplasm/nuclear outer membrane/protein complex	receptor binding/protein binding/protein kinase A binding/adenylate cyclase binding/protein complex scaffold/protein kinase A regulatory subunit binding/protein anchor/ion channel binding/kinase activity/enzyme binding/protein N-terminus binding
HIST1H3F	0.210407	439	521	0	HIST1H3F	FALSE	TRUE	TRUE	FALSE	TRUE	FALSE	TRUE	FALSE	FALSE	0	0.0768968	0.0105021	5.96177	0.0123434	0.0483489	0.00459738	0.0125348	0.000517811	0.0491695	0.170502	0.000553583	0.686398	0.0866502	0.0976703	151	66	521	855	8	1323	904	17016400	HIST1H3A / HIST1H3B / HIST1H3C / HIST1H3D / HIST1H3E / HIST1H3F / HIST1H3G / HIST1H3H / HIST1H3I / HIST1H3J	BC096131 / ENST00000446824 / NM_021018	nucleosome assembly / blood coagulation / S phase / regulation of gene silencing	nucleosome/extracellular region/nucleoplasm/nucleus/chromosome	DNA binding/protein binding/protein heterodimerization activity
BOK	0.209517	463	529	3	BOK	FALSE	TRUE	FALSE	FALSE	TRUE	FALSE	TRUE	TRUE	TRUE	0.157119	0.0375077	0.00484166	10.6455	0.0144241	0.0273449	0.0159935	0.0177546	0.0502867	0.00221184	0.116731	0.0134788	0.036714	0.017031	0.0989032	152	716	172	764	208	529	338	16893531	BOK	AF174487 / ENST00000318407 / NM_032515	apoptotic process / induction of apoptosis / activation of cysteine-type endopeptidase activity involved in apoptotic process / brain development / cell proliferation / male gonad development / oligodendrocyte differentiation / intrinsic apoptotic signaling pathway by p53 class mediator / positive regulation of execution phase of apoptosis / regulation of apoptotic process / positive regulation o…	nucleus/cytoplasm/mitochondrion/mitochondrial membrane	protein binding/protein heterodimerization activity/BH domain binding/protein dimerization activity
IL1RAP	0.209223	352	324	1	IL1RAP	FALSE	TRUE	TRUE	FALSE	FALSE	TRUE	FALSE	TRUE	TRUE	0.0785596	0.0661493	0.0113671	5.03602	0.0394674	0.0173013	0.0185965	0.0201199	0.00165676	0.095839	0.00268181	0.0831845	0.0186607	0.00838054	0.0993142	153	97	586	71	720	324	210	16949611	IL1RAP	ENST00000476929 / OTTHUMT00000343510	protein complex assembly / inflammatory response / immune response / interleukin-2 biosynthetic process / signal transduction / cytokine-mediated signaling pathway	extracellular region/plasma membrane/integral to plasma membrane/membrane/integral to membrane	signal transducer activity/interleukin-1 receptor activity
SNORD53	0.209141	632	543	0	SNORD53	FALSE	TRUE	TRUE	FALSE	FALSE	TRUE	FALSE	TRUE	TRUE	0	0.096874	0.0110284	1.66602	0.0379226	0.0156307	0.015878	0.0176738	7.01088e-05	0.834258	0.00326342	0.114535	0.0378513	0.017455	0.0994289	154	33	1393	80	788	543	341	16878585	SNORD53	NR_002741	NA	NA	NA
KLF7-IT1	0.208955	344	382	0	KLF7 IT1	FALSE	TRUE	TRUE	FALSE	FALSE	TRUE	FALSE	TRUE	TRUE	0	0.078737	0.0068073	5.44071	0.0305733	0.0178167	0.0177252	0.0188111	0.000427043	0.0714987	0.00878646	0.0754245	0.0233495	0.0123748	0.0996901	155	63	559	157	694	382	274	16907641	KLF7-IT1	ENST00000428777 / OTTHUMT00000336782	NA	NA	NA
MFGE8	0.207404	785	673	76	MFGE8	FALSE	FALSE	FALSE	FALSE	FALSE	TRUE	TRUE	FALSE	TRUE	0.492316	0.0264313	0.00793704	4.16086	0.0272288	0.0221531	0.0142431	0.0166436	0.199547	0.180693	0.0142768	0.0336901	0.0585109	0.023932	0.101896	156	1210	689	228	468	673	435	16813038	MFGE8	AK304627 / AK310357 / AY141974 / BC003610 / BT006948 / BX537974 / ENST00000268150 / ENST00000268151 / ENST00000539437 / ENST00000542878 / ENST00000558018 / ENST00000558029 / ENST00000558352 / ENST00000559143 / ENST00000559259 / ENST00000559770 / ENST00000559997 / ENST00000560937 / ENST00000566497 / GENSCAN00000044456 / NM_001114614 / NM_005928 / OTTHUMT00000309072 / OTTHUMT00000415571 / OTTHUMT00…	angiogenesis / phagocytosis, recognition / phagocytosis, engulfment / cell adhesion / single fertilization / virus-host interaction / positive regulation of apoptotic cell clearance / positive regulation of phagocytosis	extracellular region/extracellular space/external side of plasma membrane/extrinsic to plasma membrane/extracellular matrix/extracellular vesicular exosome/membrane	phosphatidylserine binding/integrin binding/phosphatidylethanolamine binding/protein binding
DTL	0.205728	541	768	0	DTL	FALSE	TRUE	FALSE	FALSE	TRUE	FALSE	FALSE	TRUE	TRUE	0	0.0365447	0.00235383	14.8255	0.00775381	0.00723531	0.0328081	0.0264581	0.0567437	0.000209389	0.398947	0.550816	0.000687574	0.00139799	0.104338	157	768	56	1122	1254	24	51	16677201	DTL	AK292343 / ENST00000366991 / ENST00000463791 / ENST00000475419 / ENST00000489149 / ENST00000496442 / ENST00000542077 / NM_016448	protein polyubiquitination / DNA replication / ubiquitin-dependent protein catabolic process / protein monoubiquitination / response to DNA damage stimulus / response to UV / translesion synthesis / G2 DNA damage checkpoint / regulation of cell cycle / protein ubiquitination	nucleus/cytoplasm/centrosome/Cul4A-RING ubiquitin ligase complex/Cul4B-RING ubiquitin ligase complex/nuclear membrane/microtubule organizing center/cytoskeleton/membrane	ubiquitin-protein ligase activity/protein binding
NMB	0.204171	706	723	64	NMB	FALSE	TRUE	TRUE	FALSE	FALSE	FALSE	TRUE	FALSE	FALSE	0.473115	0.0393327	0.00556451	3.92448	0.00719997	0.030601	0.0074824	0.011312	0.0400145	0.21408	0.441116	0.00780335	0.3571	0.127425	0.106663	158	607	723	1149	136	1079	1004	16812824	NMB	BC007407 / ENST00000360476 / ENST00000394588 / NM_021077 / NM_205858	signal transduction / elevation of cytosolic calcium ion concentration / neuropeptide signaling pathway / cell-cell signaling / positive regulation of cell proliferation / adult feeding behavior / glucose homeostasis / positive regulation of hormone secretion / negative regulation of hormone secretion / arachidonic acid secretion	extracellular region/neuron projection	hormone activity/neuromedin B receptor binding
TRIM55	0.203838	299	277	0	TRIM55	FALSE	TRUE	TRUE	FALSE	TRUE	TRUE	TRUE	FALSE	TRUE	0	0.0623308	0.00954028	6.74866	0.0434116	0.025814	0.012366	0.0171945	0.00254455	0.0281872	0.00165207	0.0175578	0.0971289	0.0202068	0.107166	159	127	405	53	277	767	384	17069521	TRIM55	AK091310 / ENST00000276573 / ENST00000315962 / ENST00000350034 / ENST00000353317 / ENST00000517647 / NM_033058 / NM_184085 / NM_184086 / NM_184087	signal transduction	nucleus/cytoplasm/microtubule/intracellular	signal transducer activity/zinc ion binding/identical protein binding/metal ion binding/protein binding
LRP5	0.203208	628	353	12	LRP5	FALSE	FALSE	FALSE	FALSE	TRUE	TRUE	TRUE	TRUE	TRUE	0.290705	0.0268551	0.00180229	7.25807	0.020799	0.0244164	0.0236485	0.023539	0.189554	0.0197995	0.0389716	0.0224449	0.00535128	0.00312655	0.108127	160	1203	353	515	338	133	93	16728066	LRP5	AF077820 / ENST00000294304 / ENST00000529993 / NM_002335	gastrulation with mouth forming second / positive regulation of mesenchymal cell proliferation / osteoblast development / glucose catabolic process / endocytosis / regulation of blood pressure / positive regulation of cell proliferation / anterior/posterior pattern specification / Wnt receptor signaling pathway / embryonic limb morphogenesis / cholesterol homeostasis / Wnt receptor signaling path…	endoplasmic reticulum/plasma membrane/integral to membrane/receptor complex/membrane	protein binding/coreceptor activity/Wnt-protein binding/toxin transporter activity/Wnt-activated receptor activity
ITGA2	0.203058	334	280	1	ITGA2	FALSE	TRUE	TRUE	FALSE	TRUE	TRUE	TRUE	FALSE	TRUE	0.0785596	0.0489172	0.00788172	7.14512	0.0393376	0.0348998	0.00938421	0.0161329	0.0122801	0.0214016	0.002726	0.00391362	0.217465	0.028021	0.108356	161	280	361	72	71	940	493	16984689	ITGA2	ENST00000296585 / ENST00000503810 / ENST00000509814 / ENST00000509960 / ENST00000510722 / ENST00000513685 / GENSCAN00000037462 / NM_002203 / NR_073103 / NR_073104 / NR_073105 / NR_073106 / NR_073107 / OTTHUMT00000253857 / OTTHUMT00000367803 / OTTHUMT00000367804 / OTTHUMT00000367805 / OTTHUMT00000367806 / OTTHUMT00000368751 / uc003joy.3 / uc011cqa.2 / uc011cqb.2 / uc011cqc.2 / uc011cqd.2 / uc011cq…	cell adhesion / cell-matrix adhesion / integrin-mediated signaling pathway / axon guidance / blood coagulation / organ morphogenesis / virus-host interaction / response to virus / extracellular matrix organization	plasma membrane/integrin complex/external side of plasma membrane/cell surface/basal part of cell/membrane/integral to membrane	protein binding/collagen binding/metal ion binding/viral receptor activity
DNTTIP1	0.202094	621	569	0	DNTTIP1	FALSE	FALSE	FALSE	FALSE	TRUE	FALSE	TRUE	TRUE	TRUE	0	0.0238494	0.00923076	16.8699	0.0130613	0.0206617	0.0203292	0.019779	0.271384	7.41648e-05	0.149466	0.0442764	0.0120397	0.00927004	0.109848	162	1288	33	823	569	237	223	16914297	DNTTIP1	AB035676 / ENST00000372622 / ENST00000467701 / NM_052951	NA	nucleus	NA
PLEKHS1	0.201497	336	249	0	PLEKHS1	FALSE	TRUE	TRUE	FALSE	FALSE	TRUE	TRUE	TRUE	TRUE	0	0.0458254	0.00774387	5.67523	0.0357082	0.0263442	0.0390527	0.0366559	0.0178983	0.0603814	0.00435365	0.0160129	0.000194701	0.000107244	0.110781	163	344	546	98	249	7	7	16709405	PLEKHS1	ENST00000354462 / ENST00000361048 / ENST00000369309 / ENST00000369310 / ENST00000369312 / ENST00000448805 / FJ236306 / NM_001193434 / NM_001193435 / NM_024889 / NM_182601	NA	NA	phospholipid binding/protein binding
MCM5	0.199818	700	706	0	MCM5	FALSE	FALSE	FALSE	FALSE	TRUE	FALSE	FALSE	TRUE	TRUE	0	0.0196468	0.0064332	18.8033	0.0100169	0.017548	0.0175047	0.016888	0.434004	2.94507e-05	0.262458	0.0793718	0.0247215	0.0221988	0.113453	164	1384	16	992	706	401	411	16929573	MCM5	AB209612 / AK291136 / AK298624 / AK301121 / BC000142 / BC003656 / CR456517 / D83986 / ENST00000216122 / ENST00000382011 / ENST00000416905 / ENST00000444778 / ENST00000451351 / ENST00000465557 / ENST00000493076 / ENST00000493569 / GENSCAN00000038034 / n342275 / NM_006739 / OTTHUMT00000320661 / OTTHUMT00000320676 / OTTHUMT00000320678 / OTTHUMT00000320679 / OTTHUMT00000320680 / OTTHUMT00000320682 / …	G1/S transition of mitotic cell cycle / mitotic cell cycle / DNA replication / DNA replication initiation / DNA strand elongation involved in DNA replication / cell cycle checkpoint / S phase of mitotic cell cycle / M/G1 transition of mitotic cell cycle / cell cycle / DNA duplex unwinding / cell division	nucleus/nucleoplasm/MCM complex	DNA binding/DNA helicase activity/protein binding/ATP binding/helicase activity/nucleotide binding/hydrolase activity
HIST1H2AK	0.199774	500	312	0	HIST1H2AK	FALSE	TRUE	TRUE	FALSE	FALSE	TRUE	TRUE	FALSE	TRUE	0	0.0808247	0.0121704	2.74193	0.0246924	0.0439765	0.00865801	0.0158806	0.000343928	0.478337	0.0209697	0.00101385	0.263625	0.0303011	0.113523	165	60	1001	312	16	992	521	17016496	HIST1H2AG / HIST1H2AH / HIST1H2AI / HIST1H2AK / HIST1H2AL / HIST1H2AM	BC104198 / ENST00000330180 / NM_003510	nucleosome assembly	nucleosome/nucleus/chromosome/intracellular	DNA binding/protein heterodimerization activity/protein binding/enzyme binding/sequence-specific DNA binding
CACNG4	0.199495	380	438	0	CACNG4	FALSE	TRUE	TRUE	FALSE	TRUE	TRUE	FALSE	FALSE	FALSE	0	0.0430433	0.00515773	13.3532	0.0320855	0.0174355	0.00858639	0.0120195	0.0252162	0.000462032	0.00710811	0.0810872	0.268632	0.101963	0.113973	166	438	88	136	711	997	938	16837172	CACNG4	BC034532 / ENST00000262138 / NM_014405	transport / synaptic transmission / membrane depolarization / regulation of alpha-amino-3-hydroxy-5-methyl-4-isoxazole propionate selective glutamate receptor activity / ion transport / calcium ion transport / transmission of nerve impulse / regulation of ion transmembrane transport / calcium ion transmembrane transport	plasma membrane/integral to plasma membrane/voltage-gated calcium channel complex/endocytic vesicle membrane/alpha-amino-3-hydroxy-5-methyl-4-isoxazolepropionic acid selective glutamate receptor complex/membrane/integral to membrane	voltage-gated calcium channel activity/voltage-gated ion channel activity/calcium channel activity
OTUB2	0.198954	387	635	0	OTUB2	FALSE	TRUE	TRUE	FALSE	TRUE	FALSE	FALSE	FALSE	FALSE	0	0.0450421	0.0134576	13.5879	0.0166478	0.0197065	0.0120687	0.0137232	0.019705	0.000406185	0.0786968	0.0528624	0.105288	0.0595415	0.114854	167	376	80	697	635	782	792	16787790	OTUB2	BC068058 / ENST00000203664 / ENST00000553723 / NM_023112	proteolysis / cellular amino acid metabolic process / protein deubiquitination / protein K63-linked deubiquitination / protein K48-linked deubiquitination / protein metabolic process / protein K11-linked deubiquitination	cellular_component	ubiquitin-specific protease activity/omega peptidase activity/peptidase activity/cysteine-type peptidase activity/hydrolase activity
NUF2	0.198921	609	770	1	NUF2	FALSE	TRUE	FALSE	FALSE	TRUE	FALSE	FALSE	FALSE	FALSE	0.0785596	0.0327097	0.0036529	14.8164	0.0143186	0.0189886	0.0103524	0.0121223	0.0918126	0.000210386	0.11897	0.0604614	0.167656	0.0987077	0.114907	168	997	58	770	661	881	932	16673154	NUF2	AB050577 / AF326731 / BC008489 / ENST00000271452 / ENST00000367900 / ENST00000442820 / ENST00000450453 / ENST00000487578 / ENST00000490881 / ENST00000497990 / ENST00000524800 / ENST00000527439 / ENST00000534289 / GENSCAN00000017118 / NM_031423 / NM_145697 / OTTHUMT00000082812 / OTTHUMT00000082813 / OTTHUMT00000082814 / OTTHUMT00000082815 / OTTHUMT00000082816 / OTTHUMT00000082817 / OTTHUMT00000082…	mitotic cell cycle / chromosome segregation / mitosis / cell division / cell cycle / M phase of mitotic cell cycle / mitotic prometaphase	chromosome, centromeric region/condensed chromosome kinetochore/nucleus/cytosol/Ndc80 complex/kinetochore/chromosome	protein binding/molecular_function
GSTT2	0.198472	674	645	1	GSTT2	FALSE	TRUE	TRUE	FALSE	FALSE	FALSE	TRUE	FALSE	TRUE	0.0785596	0.0849843	0.0128723	1.14678	0.013601	0.0354321	0.0147325	0.0180881	0.00022497	0.959056	0.135466	0.00360167	0.0513241	0.0153909	0.115643	169	49	1469	803	68	645	319	16928115	GSTT2 / GSTT2B	BC146936 / CR456929 / ENST00000215780 / NM_000854	xenobiotic metabolic process / small molecule metabolic process / glutathione derivative biosynthetic process	nucleus/nucleolus/cytoplasm/cytosol	glutathione transferase activity/transferase activity/protein binding
CITED2	0.197865	444	340	3	CITED2	FALSE	TRUE	TRUE	FALSE	TRUE	TRUE	FALSE	FALSE	FALSE	0.157119	0.0574083	0.0068582	7.39798	0.0406407	0.00899092	0.00505841	0.00867902	0.00448007	0.0179877	0.00231622	0.4059	0.626828	0.286393	0.116644	170	166	340	67	1126	1286	1243	17024285	CITED2	BC004377 / ENST00000367651 / ENST00000536159 / ENST00000537332 / NM_001168388 / NM_001168389 / NM_006079	negative regulation of transcription from RNA polymerase II promoter / vasculogenesis / response to hypoxia / trophectodermal cell differentiation / neural tube closure / liver development / embryonic placenta development / heart looping / lens morphogenesis in camera-type eye / hematopoietic progenitor cell differentiation / outflow tract morphogenesis / regulation of organ formation / endocardi…	nuclear chromatin/nucleus/cytoplasm	RNA polymerase II activating transcription factor binding/RNA polymerase II transcription coactivator activity/RNA polymerase II transcription corepressor activity/chromatin binding/sequence-specific DNA binding transcription factor activity/transcription coactivator activity/transcription corepressor activity/protein binding/histone acetyltransferase binding/SMAD binding/LBD domain binding
TNFRSF12A	0.197078	442	197	2	TNFRSF12A	FALSE	TRUE	TRUE	FALSE	FALSE	TRUE	TRUE	FALSE	TRUE	0.124514	0.0615717	0.00180929	3.6336	0.0434726	0.0278396	0.00857448	0.0146935	0.00277394	0.263091	0.00164004	0.0123877	0.269472	0.0438861	0.117958	171	132	777	52	197	998	682	16815310	TNFRSF12A	BC020538 / ENST00000326577 / ENST00000341627 / ENST00000571351 / ENST00000574699 / NM_016639	angiogenesis / apoptotic process / induction of apoptosis / cellular component movement / substrate-dependent cell migration, cell attachment to substrate / multicellular organismal development / positive regulation of axon extension / positive regulation of extrinsic apoptotic signaling pathway / cell adhesion / cell death / cell differentiation	ruffle/plasma membrane/cell surface/integral to membrane/membrane	protein binding
SCARNA5	0.196285	487	525	0	SCARNA5	FALSE	TRUE	TRUE	FALSE	FALSE	TRUE	TRUE	FALSE	TRUE	0	0.0825694	0.0142443	2.93729	0.0206575	0.0373779	0.0114121	0.0165102	0.000287524	0.42231	0.0398876	0.00266982	0.125826	0.0249371	0.119296	172	53	945	525	50	816	448	16892521	SCARNA5	n3891 / NR_003008	NA	NA	NA
VASP	0.196134	600	749	10	VASP	FALSE	TRUE	FALSE	FALSE	TRUE	FALSE	TRUE	FALSE	FALSE	0.271771	0.0368817	0.00309705	7.90114	0.00625343	0.0334422	0.00969843	0.0133686	0.0543942	0.0127865	0.521696	0.00492623	0.199929	0.0665876	0.119553	173	749	307	1219	92	921	821	16863307	VASP	BC026019 / BC038224 / ENST00000245932 / ENST00000586014 / ENST00000586619 / ENST00000588273 / ENST00000588463 / ENST00000588482 / ENST00000589627 / ENST00000590459 / ENST00000590603 / ENST00000592139 / GENSCAN00000000718 / NM_003370 / OTTHUMT00000459588 / OTTHUMT00000459589 / OTTHUMT00000459590 / OTTHUMT00000459591 / OTTHUMT00000459592 / OTTHUMT00000459593 / OTTHUMT00000459594 / OTTHUMT0000045959…	neural tube closure / axon guidance / actin polymerization or depolymerization / cell junction assembly / T cell receptor signaling pathway / protein homotetramerization / actin cytoskeleton organization	cytoplasm/cytosol/plasma membrane/focal adhesion/actin cytoskeleton/lamellipodium membrane/filopodium membrane/cytoskeleton/membrane/lamellipodium/cell junction/filopodium/cell projection	actin binding/protein binding/profilin binding/SH3 domain binding
EFNB2	0.195752	545	122	3	EFNB2	FALSE	TRUE	TRUE	FALSE	FALSE	TRUE	TRUE	FALSE	TRUE	0.157119	0.0628241	0.00666513	2.43057	0.038486	0.0319288	0.00846368	0.0148764	0.00240619	0.576819	0.00303663	0.00628185	0.277409	0.0414424	0.120205	174	122	1112	77	116	1010	656	16780859	EFNB2	ENST00000245323 / NM_004093 / U81262	lymph vessel development / cell migration involved in sprouting angiogenesis / cell adhesion / cell-cell signaling / nervous system development / anatomical structure morphogenesis / organ morphogenesis / virus-host interaction / cell differentiation / ephrin receptor signaling pathway / regulation of chemotaxis / positive regulation of cardiac muscle cell differentiation / angiogenesis / multice…	plasma membrane/integral to plasma membrane/membrane/integral to membrane	ephrin receptor binding/receptor binding/protein binding
KIAA1551	0.195341	289	310	0	KIAA1551	FALSE	TRUE	TRUE	FALSE	TRUE	TRUE	TRUE	TRUE	TRUE	0	0.0455854	0.00348324	7.88813	0.0230692	0.0278264	0.0304833	0.0294227	0.0184331	0.0128988	0.0270304	0.0124156	0.00112974	0.000638324	0.12091	175	349	310	386	200	34	26	16749747	KIAA1551	BC140819 / ENST00000312561 / ENST00000381054 / ENST00000397578 / ENST00000535596 / ENST00000535606 / ENST00000540924 / ENST00000541981 / ENST00000543763 / GENSCAN00000019836 / NM_018169 / OTTHUMT00000250307 / OTTHUMT00000403333 / OTTHUMT00000403334 / OTTHUMT00000403335 / OTTHUMT00000403336 / OTTHUMT00000403337 / OTTHUMT00000403338 / OTTHUMT00000403339 / uc001rks.3	NA	NA	NA
IFI6	0.194504	394	534	1	IFI6	FALSE	TRUE	TRUE	FALSE	TRUE	TRUE	FALSE	TRUE	TRUE	0.0785596	0.0409868	0.0077172	9.89921	0.0305835	0.019735	0.0157016	0.017614	0.0325526	0.00350195	0.00877374	0.0525819	0.0396589	0.0177759	0.122362	176	534	200	156	634	557	347	16684080	IFI6	BC011601 / BC015603 / BT006850 / ENST00000339145 / ENST00000361157 / ENST00000362020 / GENSCAN00000022734 / NM_002038 / NM_022872 / NM_022873 / OTTHUMT00000009780 / OTTHUMT00000009781 / OTTHUMT00000009782 / uc001bon.1 / uc001boo.1 / uc001bop.1	release of cytochrome c from mitochondria / immune response / cytokine-mediated signaling pathway / negative regulation of apoptotic process / negative regulation of cysteine-type endopeptidase activity involved in apoptotic process / negative regulation of mitochondrial depolarization / type I interferon-mediated signaling pathway / negative regulation of extrinsic apoptotic signaling pathway in…	mitochondrion/plasma membrane/integral to membrane/membrane	protein binding
ST6GALNAC2	0.194264	401	499	1	ST6GALNAC2	FALSE	TRUE	TRUE	FALSE	TRUE	TRUE	FALSE	FALSE	TRUE	0.0785596	0.0453291	0.0123041	11.2675	0.0209839	0.0130596	0.0141856	0.0145644	0.0190223	0.0015226	0.0378091	0.188127	0.059422	0.0456991	0.12278	177	362	143	499	920	675	696	16849274	ST6GALNAC2	BC038114 / BC040455 / BT019972 / ENST00000225276 / ENST00000585390 / ENST00000585736 / ENST00000586520 / ENST00000588005 / ENST00000588120 / ENST00000588920 / ENST00000589997 / ENST00000592979 / GENSCAN00000005799 / NM_006456 / OTTHUMT00000450649 / OTTHUMT00000450650 / OTTHUMT00000450651 / OTTHUMT00000450963 / OTTHUMT00000450964 / OTTHUMT00000450965 / OTTHUMT00000450966 / OTTHUMT00000450967 / OTT…	O-glycan processing / post-translational protein modification / cellular protein metabolic process / protein glycosylation	Golgi membrane/integral to Golgi membrane/Golgi apparatus/membrane/integral to membrane	sialyltransferase activity/transferase activity/transferase activity, transferring glycosyl groups
PPP2R3A	0.193774	350	169	0	PPP2R3A	FALSE	TRUE	TRUE	FALSE	FALSE	FALSE	TRUE	TRUE	TRUE	0	0.0568705	0.00781739	5.78695	0.0115467	0.043388	0.0234106	0.0257515	0.00476971	0.0557259	0.19752	0.00110222	0.00566438	0.00169352	0.12364	178	169	529	896	19	142	58	16945993	PPP2R3A	AK293012 / AK298059 / AK299544 / AK302163 / AK316258 / AL389975 / BC065531 / ENST00000264977 / ENST00000334546 / ENST00000447251 / ENST00000469270 / ENST00000490467 / ENST00000492624 / GENSCAN00000017339 / L07590 / L12146 / NM_001190447 / NM_002718 / NM_181897 / OTTHUMT00000357232 / OTTHUMT00000357233 / OTTHUMT00000357234 / OTTHUMT00000357235 / OTTHUMT00000357236 / uc003eqv.2 / uc003eqw.2 / uc011…	eye photoreceptor cell differentiation / protein dephosphorylation / somatic muscle development / positive regulation of protein catabolic process / somite development / negative regulation of canonical Wnt receptor signaling pathway / Wnt receptor signaling pathway involved in somitogenesis / regulation of cell motility involved in somitogenic axis elongation / positive regulation of canonical W…	protein phosphatase type 2A complex	calcium ion binding/protein binding/protein phosphatase type 2A regulator activity/metal ion binding
IER3	0.193463	538	729	2	IER3	FALSE	TRUE	TRUE	FALSE	FALSE	TRUE	FALSE	FALSE	FALSE	0.124514	0.0710251	0.00602235	3.90587	0.0504435	0.0107576	0.00417217	0.00912569	0.000969656	0.216942	0.000734717	0.292418	0.741369	0.250573	0.124191	179	85	729	30	1020	1353	1194	17017018	IER3	AF039067 / AF083421 / BC000844 / BC005080 / BT006703 / ENST00000259874 / ENST00000376377 / ENST00000383560 / ENST00000400509 / ENST00000416336 / ENST00000416884 / ENST00000429592 / ENST00000435856 / ENST00000436988 / ENST00000439190 / ENST00000446599 / ENST00000450236 / GENSCAN00000022591 / NM_003897 / OTTHUMT00000035635 / OTTHUMT00000035636 / OTTHUMT00000076578 / OTTHUMT00000076579 / OTTHUMT0000…	response to protozoan / negative regulation of systemic arterial blood pressure / apoptotic process / anatomical structure morphogenesis / positive regulation of apoptotic process / negative regulation of apoptotic process / positive regulation of protein catabolic process / negative regulation of glycolysis / negative regulation of inflammatory response / regulation of reactive oxygen species me…	nucleus/integral to membrane/membrane/cellular_component	protein binding/molecular_function
LGALS3	0.193385	797	647	40	LGALS3	FALSE	FALSE	FALSE	FALSE	FALSE	FALSE	TRUE	TRUE	TRUE	0.420887	0.0270162	0.0067006	4.47829	0.00546553	0.0273464	0.023001	0.022264	0.185876	0.143654	0.596502	0.0134753	0.00624984	0.00449121	0.124328	180	1199	647	1280	207	149	129	16784381	LGALS3	AB209391 / ENST00000254301 / ENST00000553755 / ENST00000556322 / ENST00000556438 / NM_001177388 / NM_002306 / NR_003225	skeletal system development / mRNA processing / RNA splicing / cell differentiation / extracellular matrix organization / innate immune response	proteinaceous extracellular matrix/nucleus/spliceosomal complex/cytoplasm/mitochondrial inner membrane/plasma membrane/extracellular matrix/extracellular region	protein binding/IgE binding/carbohydrate binding
NOS3	0.192176	742	329	26	NOS3	FALSE	FALSE	FALSE	FALSE	TRUE	TRUE	FALSE	TRUE	TRUE	0.373542	0.0236894	0.00412132	7.52083	0.0242914	0.00715919	0.0205479	0.0186284	0.276503	0.0165404	0.0223142	0.557764	0.0114001	0.0130735	0.126491	181	1292	329	325	1260	226	284	17053455	NOS3	BC063294 / ENST00000297494 / ENST00000461406 / ENST00000467517 / ENST00000468293 / ENST00000477227 / ENST00000484524 / NM_000603 / NM_001160109 / NM_001160110 / NM_001160111	angiogenesis / ovulation from ovarian follicle / in utero embryonic development / blood vessel remodeling / regulation of sodium ion transport / regulation of the force of heart contraction by chemical signal / regulation of systemic arterial blood pressure by endothelin / arginine catabolic process / nitric oxide biosynthetic process / mitochondrion organization / nitric oxide mediated signal tr…	Golgi membrane/nucleus/cytoplasm/cytosol/cytoskeleton/plasma membrane/caveola/endocytic vesicle membrane/Golgi apparatus/membrane	actin monomer binding/NADPH-hemoprotein reductase activity/nitric-oxide synthase activity/iron ion binding/protein binding/calmodulin binding/FMN binding/heme binding/tetrahydrobiopterin binding/arginine binding/cadmium ion binding/flavin adenine dinucleotide binding/NADP binding/oxidoreductase activity/metal ion binding
SPRY4	0.191842	716	730	11	SPRY4	FALSE	TRUE	FALSE	FALSE	FALSE	TRUE	FALSE	FALSE	TRUE	0.281633	0.0351095	0.000926136	3.90404	0.0620086	0.0191604	0.00849989	0.0147357	0.0679451	0.217226	0.000219439	0.0585437	0.274792	0.0433096	0.127095	182	858	730	14	656	1006	677	17001063	SPRY4	AF227516 / ENST00000344120 / ENST00000434127 / ENST00000503582 / ENST00000509364 / ENST00000511815 / NM_001127496 / NM_030964	multicellular organismal development / negative regulation of MAP kinase activity / regulation of signal transduction	cytoplasm/ruffle membrane/plasma membrane/membrane/cell projection	protein binding
CYP24A1	0.191793	494	406	6	CYP24A1	FALSE	TRUE	TRUE	FALSE	TRUE	TRUE	TRUE	FALSE	FALSE	0.220545	0.0409954	0.00803624	6.74751	0.0230977	0.0329251	0.00671084	0.0124454	0.0325176	0.0282099	0.0269089	0.00535029	0.432195	0.0891312	0.127185	183	533	406	383	99	1144	907	16920497	CYP24A1	ENST00000216862 / ENST00000395955 / L13286 / NM_000782 / NM_001128915	osteoblast differentiation / vitamin metabolic process / xenobiotic metabolic process / steroid metabolic process / response to vitamin D / vitamin D metabolic process / vitamin D catabolic process / small molecule metabolic process / oxidation-reduction process / vitamin D receptor signaling pathway	mitochondrial inner membrane/mitochondrion	iron ion binding/25-hydroxycholecalciferol-24-hydroxylase activity/electron carrier activity/oxidoreductase activity/heme binding/1-alpha,25-dihydroxyvitamin D3 24-hydroxylase activity/monooxygenase activity/oxidoreductase activity, acting on paired donors, with incorporation or reduction of molecular oxygen/metal ion binding
CISH	0.190622	909	1078	94	CISH	FALSE	FALSE	FALSE	FALSE	TRUE	TRUE	FALSE	FALSE	FALSE	0.516125	0.0151039	0.00427452	8.90185	0.0199813	0.00430086	0.00749077	0.00799999	0.667854	0.00660452	0.0446023	0.831908	0.356346	0.349165	0.129329	184	1443	258	579	1425	1078	1302	16954567	CISH	AF035947 / ENST00000348721 / ENST00000443053 / ENST00000491847 / NM_013324 / NM_145071	regulation of cell growth / negative regulation of signal transduction / protein ubiquitination / intracellular signal transduction / JAK-STAT cascade involved in growth hormone signaling pathway / protein kinase C-activating G-protein coupled receptor signaling pathway / regulation of growth	cytosol/cellular_component/plasma membrane	molecular_function/protein binding
MAP2K2	0.190382	713	741	45	MAP2K2	FALSE	TRUE	FALSE	FALSE	FALSE	TRUE	FALSE	FALSE	FALSE	0.433929	0.037469	0.00922145	3.84594	0.0233148	0.0144791	0.0114053	0.01291	0.0505318	0.226405	0.0260013	0.143005	0.126058	0.0769633	0.129773	185	720	741	370	851	817	873	16867240	MAP2K2	AK126446 / ENST00000262948 / ENST00000595715 / ENST00000600584 / ENST00000601786 / NM_030662	MAPK cascade / activation of MAPKK activity / activation of MAPK activity / toll-like receptor signaling pathway / MyD88-dependent toll-like receptor signaling pathway / MyD88-independent toll-like receptor signaling pathway / protein phosphorylation / epidermal growth factor receptor signaling pathway / small GTPase mediated signal transduction / Ras protein signal transduction / axon guidance /…	extracellular region/nucleus/mitochondrion/early endosome/late endosome/peroxisomal membrane/endoplasmic reticulum/Golgi apparatus/cytosol/microtubule/cell-cell junction/focal adhesion/cell cortex/internal side of plasma membrane/perinuclear region of cytoplasm	protein serine/threonine kinase activity/MAP kinase kinase activity/protein serine/threonine/tyrosine kinase activity/protein tyrosine kinase activity/protein binding/ATP binding/PDZ domain binding/protein complex scaffold/protein serine/threonine kinase activator activity/scaffold protein binding/nucleotide binding/protein kinase activity/kinase activity/transferase activity/transferase activity…
IVL	0.190137	590	426	3	IVL	FALSE	FALSE	FALSE	FALSE	TRUE	FALSE	TRUE	TRUE	TRUE	0.157119	0.0329948	0.00300146	10.6724	0.00844631	0.0239953	0.0172035	0.0176057	0.0885912	0.002176	0.351305	0.0241873	0.0267342	0.0178211	0.130229	186	976	171	1084	359	426	348	16671094	IVL	BC046391 / ENST00000392667 / NM_005547	response to UV-B / peptide cross-linking / isopeptide cross-linking via N6-(L-isoglutamyl)-L-lysine / keratinocyte differentiation / keratinization	cornified envelope/cytoplasm	structural molecule activity/protein binding, bridging
PER1	0.188384	654	743	6	PER1	FALSE	FALSE	FALSE	FALSE	TRUE	TRUE	FALSE	FALSE	FALSE	0.220545	0.0293543	0.00581454	10.1299	0.0281169	0.0116885	0.0129379	0.0139946	0.139484	0.00303402	0.0125212	0.244917	0.0831881	0.0546638	0.133534	187	1130	190	204	977	743	766	16840846	PER1	AF022991 / ENST00000317276 / ENST00000578223 / ENST00000579065 / ENST00000581395 / ENST00000582719 / ENST00000584202 / NM_002616	negative regulation of transcription from RNA polymerase II promoter / transcription, DNA-dependent / circadian rhythm / response to light stimulus / entrainment of circadian clock / circadian regulation of gene expression / negative regulation of transcription, DNA-dependent / regulation of transcription, DNA-dependent / signal transduction / rhythmic process	nucleus/cytoplasm	RNA polymerase II core promoter proximal region sequence-specific DNA binding/protein binding transcription factor activity/signal transducer activity/E-box binding/protein binding
PSTPIP2	0.187843	590	637	0	PSTPIP2	FALSE	FALSE	FALSE	FALSE	TRUE	FALSE	FALSE	TRUE	TRUE	0	0.0317059	0.00139301	15.2072	0.0189358	0.0115507	0.0173165	0.0164905	0.104099	0.000171607	0.0531332	0.251458	0.02596	0.0250891	0.134571	188	1043	49	637	983	417	450	16854904	PSTPIP2	BC035395 / ENST00000409746 / ENST00000587042 / ENST00000588801 / ENST00000589328 / ENST00000591729 / ENST00000593086 / NM_024430	NA	cytosol/cytoskeleton/membrane/cytoplasm	NA
FOSL1	0.187598	521	448	6	FOSL1	FALSE	TRUE	TRUE	FALSE	TRUE	TRUE	FALSE	TRUE	TRUE	0.220545	0.0410395	0.00255269	6.38945	0.0386407	0.00719501	0.0173983	0.017468	0.0323394	0.0362827	0.00297743	0.554488	0.0254138	0.0185858	0.135044	189	531	448	76	1257	415	358	16740630	FOSL1	BC016648 / ENST00000312562 / NM_005438	in utero embryonic development / regulation of transcription from RNA polymerase II promoter / transcription from RNA polymerase II promoter / chemotaxis / cellular defense response / vitellogenesis / female pregnancy / learning / positive regulation of cell proliferation / negative regulation of cell proliferation / response to mechanical stimulus / response to virus / response to gravity / cell…	nucleus/cytosol/presynaptic membrane/neuron projection/intracellular membrane-bounded organelle	RNA polymerase II regulatory region sequence-specific DNA binding/sequence-specific DNA binding transcription factor activity/protein binding/DNA binding/sequence-specific DNA binding
SNORD11	0.187455	534	726	0	SNORD11	FALSE	TRUE	TRUE	FALSE	FALSE	TRUE	FALSE	FALSE	FALSE	0	0.0869082	0.0124159	2.77321	0.0348165	0.0171003	0.0106554	0.013743	0.000185422	0.469044	0.00490108	0.0864316	0.154472	0.059172	0.13532	190	44	992	107	726	863	790	16889631	SNORD11	NR_003031	NA	NA	NA
CLCF1	0.187231	305	237	0	CLCF1	FALSE	TRUE	TRUE	FALSE	TRUE	TRUE	TRUE	FALSE	TRUE	0	0.0514197	0.00241822	6.9065	0.0360608	0.0328032	0.0140189	0.0189865	0.00908523	0.0252494	0.00415602	0.00545584	0.0621432	0.0117407	0.135755	191	237	384	95	101	682	269	16740969	CLCF1	AF172854 / ENST00000312438 / ENST00000533438 / NM_001166212 / NM_013246	positive regulation of immunoglobulin production / cell surface receptor signaling pathway / JAK-STAT cascade / positive regulation of cell proliferation / cytokine-mediated signaling pathway / B cell differentiation / positive regulation of B cell proliferation / positive regulation of tyrosine phosphorylation of Stat3 protein / negative regulation of apoptotic process / negative regulation of n…	extracellular region/CRLF-CLCF1 complex/CNTFR-CLCF1 complex/extracellular space/cytoplasm	receptor binding/cytokine activity/ciliary neurotrophic factor receptor binding/protein binding/growth factor activity/protein heterodimerization activity
UHRF1	0.186927	722	1215	0	UHRF1	FALSE	FALSE	FALSE	FALSE	TRUE	FALSE	FALSE	TRUE	TRUE	0	0.0259105	0.0051905	16.0951	0.00631092	0.00327739	0.0321012	0.025148	0.212489	0.00010905	0.516501	0.91432	0.000798342	0.00199795	0.136346	192	1229	40	1215	1445	27	65	16857258	OTTHUMG00000168964 / RP11-424C20.2 / UHRF1	AB177623 / AB177624 / AF129507 / AF274048 / AK289389 / AK303361 / BC113875 / EF560733 / ENST00000262952 / ENST00000398240 / ENST00000540175 / ENST00000543616 / ENST00000587187 / ENST00000587870 / ENST00000591699 / ENST00000591733 / ENST00000592200 / ENST00000592666 / GENSCAN00000022938 / NM_001048201 / NM_013282 / OTTHUMT00000401760 / OTTHUMT00000450444 / OTTHUMT00000450445 / OTTHUMT00000450446 /…	negative regulation of transcription from RNA polymerase II promoter / DNA repair / transcription, DNA-dependent / cell cycle / cell proliferation / maintenance of DNA methylation / histone monoubiquitination / histone ubiquitination / positive regulation of cellular protein metabolic process / protein ubiquitination involved in ubiquitin-dependent protein catabolic process / positive regulation …	nuclear chromatin/euchromatin/heterochromatin/nucleus/replication fork/nuclear matrix	core promoter proximal region sequence-specific DNA binding/sequence-specific DNA binding transcription factor activity/ubiquitin-protein ligase activity/protein binding/zinc ion binding/methyl-CpG binding/nucleosomal histone binding/methylated histone residue binding/histone binding/identical protein binding/hemi-methylated DNA-binding/DNA binding/ligase activity/metal ion binding
ORC1	0.186652	783	994	2	ORC1	FALSE	FALSE	FALSE	FALSE	TRUE	FALSE	FALSE	TRUE	TRUE	0.124514	0.0148106	0.0075105	16.6101	0.0100082	0.00335798	0.0225762	0.0183258	0.68394	8.43143e-05	0.262879	0.908654	0.00692527	0.0143227	0.136884	193	1449	34	994	1443	162	305	16687188	ORC1	ENST00000371566 / ENST00000371568 / ENST00000476332 / NM_001190818 / NM_001190819 / NM_004153 / U43416	G1/S transition of mitotic cell cycle / regulation of transcription involved in G1/S phase of mitotic cell cycle / mitotic cell cycle / DNA replication / DNA replication initiation / cell cycle checkpoint / S phase of mitotic cell cycle / M/G1 transition of mitotic cell cycle	origin recognition complex/nucleus/nucleoplasm/nuclear origin of replication recognition complex/nucleolus/cytoplasm/cytosol/plasma membrane	DNA binding/protein binding/ATP binding/nucleoside-triphosphatase activity/nucleotide binding
ACOXL	0.186455	362	316	0	ACOXL	FALSE	TRUE	TRUE	FALSE	TRUE	FALSE	TRUE	TRUE	TRUE	0	0.0471084	0.00793881	6.48067	0.013291	0.0292169	0.0366147	0.0334381	0.0152993	0.0340209	0.143329	0.00981873	0.000314875	0.000232122	0.137272	194	316	439	814	163	12	13	16884304	ACOXL	AK300513 / ENST00000340561 / ENST00000439055 / ENST00000443586 / ENST00000448863 / NM_001142807	fatty acid beta-oxidation / fatty acid metabolic process / biological_process / metabolic process / oxidation-reduction process	peroxisome/cellular_component	acyl-CoA dehydrogenase activity/acyl-CoA oxidase activity/flavin adenine dinucleotide binding/molecular_function/oxidoreductase activity/oxidoreductase activity, acting on the CH-CH group of donors
OAS1	0.185709	520	575	2	OAS1	FALSE	TRUE	TRUE	FALSE	TRUE	FALSE	TRUE	FALSE	FALSE	0.124514	0.0401361	0.00305882	11.6216	0.0117105	0.0221903	0.00591431	0.00911	0.0361944	0.00123572	0.191623	0.0334629	0.520997	0.251761	0.138746	195	575	131	888	462	1208	1199	16757324	OAS1	AJ629455 / AK123528 / AK291003 / AK300346 / AK301498 / AY730627 / AY730628 / BC000562 / BC061587 / BC071981 / BT006785 / D00068 / DQ823040 / DQ914956 / ENST00000202917 / ENST00000445409 / ENST00000452357 / ENST00000540589 / ENST00000549820 / ENST00000550689 / ENST00000551241 / ENST00000552526 / ENST00000553185 / GENSCAN00000044435 / n332510 / NM_001032409 / NM_002534 / NM_016816 / OTTHUMT00000405…	purine nucleotide biosynthetic process / response to virus / cytokine-mediated signaling pathway / cellular response to interferon-alpha / negative regulation of viral genome replication / protein oligomerization / defense response to virus / interferon-gamma-mediated signaling pathway / type I interferon-mediated signaling pathway / regulation of ribonuclease activity / immune response / innate …	extracellular region/nucleus/cytoplasm/mitochondrion/endoplasmic reticulum/cytosol/intracellular membrane-bounded organelle	2'-5'-oligoadenylate synthetase activity/double-stranded RNA binding/ATP binding/zinc ion binding/metal ion binding/RNA binding/transferase activity/nucleotidyltransferase activity/nucleotide binding/protein binding
HIST2H3D	0.185518	403	317	0	HIST2H3D	FALSE	TRUE	TRUE	FALSE	TRUE	FALSE	FALSE	TRUE	TRUE	0	0.0470981	0.00345911	12.6926	0.0143734	0.00585947	0.0200244	0.0171926	0.0153186	0.000667716	0.117803	0.68217	0.0129951	0.0202181	0.139126	196	317	107	766	1339	252	385	16670387	HIST2H3A / HIST2H3C / HIST2H3D / HIST2H3PS2	BC015544 / BC063540 / BC074969 / BC130635 / BC130637 / ENST00000331491 / ENST00000369158 / ENST00000392948 / ENST00000403683 / ENST00000578851 / ENST00000580481 / ENST00000583401 / ENST00000585113 / GENSCAN00000000311 / GENSCAN00000000334 / GENSCAN00000000335 / GENSCAN00000009814 / GENSCAN00000052369 / GENSCAN00000052383 / GENSCAN00000052384 / GENSCAN00000052523 / NM_001005464 / NM_021059 / OTTHU…	nucleosome assembly / blood coagulation	nucleosome/extracellular region/nucleoplasm/nucleus/chromosome	DNA binding/protein binding/protein heterodimerization activity
HIST2H3D	0.185518	403	317	0	HIST2H3D	FALSE	TRUE	TRUE	FALSE	TRUE	FALSE	FALSE	TRUE	TRUE	0	0.0470981	0.00345911	12.6926	0.0143734	0.00585947	0.0200244	0.0171926	0.0153186	0.000667716	0.117803	0.68217	0.0129951	0.0202181	0.139126	196	317	107	766	1339	252	385	16692616	HIST2H3A / HIST2H3C / HIST2H3D / HIST2H3PS2	BC015544 / BC074969 / BC130635 / BC130637 / ENST00000331491 / ENST00000369158 / ENST00000392948 / ENST00000403683 / ENST00000578851 / ENST00000580481 / ENST00000583401 / ENST00000585113 / GENSCAN00000000311 / GENSCAN00000000334 / GENSCAN00000000335 / GENSCAN00000009814 / GENSCAN00000052369 / GENSCAN00000052383 / GENSCAN00000052384 / GENSCAN00000052523 / NM_001005464 / NM_021059 / OTTHUMT000000334…	nucleosome assembly / blood coagulation	nucleosome/extracellular region/nucleoplasm/nucleus/chromosome	DNA binding/protein binding/protein heterodimerization activity
ANXA9	0.185474	610	668	1	ANXA9	FALSE	FALSE	FALSE	FALSE	TRUE	TRUE	FALSE	FALSE	TRUE	0.0785596	0.0319731	0.00477867	13.0956	0.0200939	0.0139212	0.0143483	0.0147559	0.10068	0.000532824	0.0437763	0.159279	0.056884	0.0430363	0.139215	198	1031	94	569	879	668	672	16670681	ANXA9	BC005830 / ENST00000368947 / ENST00000474997 / NM_003568	cell-cell adhesion	cytosol/cell surface	phosphatidylserine binding/calcium ion binding/phospholipid binding/calcium-dependent phospholipid binding/acetylcholine receptor activity/protein homodimerization activity/protein binding
SNX18	0.185207	426	569	0	SNX18	FALSE	TRUE	TRUE	FALSE	FALSE	TRUE	FALSE	FALSE	FALSE	0	0.0785362	0.00627068	5.30324	0.0298862	0.016168	0.00857111	0.0116135	0.000436081	0.0789685	0.00968948	0.103303	0.269711	0.115889	0.139748	199	64	569	168	765	999	971	16984772	SNX18	AF395536 / ENST00000326277 / ENST00000343017 / ENST00000381410 / NM_001102575 / NM_001145427 / NM_052870	endocytosis / cell communication / protein transport / positive regulation of GTPase activity / mitotic cytokinesis / transport / endosomal transport / cleavage furrow formation	endosome membrane/endomembrane system/clathrin-coated vesicle/extrinsic to internal side of plasma membrane/endosome/plasma membrane/membrane/cytoplasmic membrane-bounded vesicle/growth cone/neuronal cell body	protein binding/phosphatidylinositol binding/lipid binding
ID1	0.184208	611	600	20	ID1	FALSE	TRUE	TRUE	FALSE	FALSE	FALSE	FALSE	TRUE	TRUE	0.345059	0.0439229	0.00290349	4.92809	0.0060899	0.0107172	0.0201314	0.0173923	0.0226183	0.103647	0.536678	0.294663	0.0126508	0.0190205	0.141764	200	400	600	1231	1023	248	370	16912362	ID1	BC000613 / ENST00000376105 / ENST00000376112 / NM_002165 / NM_181353	negative regulation of transcription from RNA polymerase II promoter / angiogenesis / endothelial cell morphogenesis / transcription, DNA-dependent / apoptotic process / transforming growth factor beta receptor signaling pathway / heart development / negative regulation of transcription by transcription factor localization / BMP signaling pathway / protein destabilization / collagen metabolic pro…	nucleus/cytoplasm	sequence-specific DNA binding transcription factor activity/protein binding/protein dimerization activity
SLC29A1	0.18402	791	1241	1	SLC29A1	FALSE	FALSE	FALSE	FALSE	TRUE	FALSE	FALSE	TRUE	TRUE	0.0785596	0.0209253	0.00290609	17.1836	0.00597096	0.00496783	0.0186903	0.0153433	0.378246	6.3614e-05	0.547761	0.769554	0.0182188	0.0358164	0.142146	201	1360	28	1241	1397	321	592	17009193	SLC29A1	AB490708 / AF079117 / AK090491 / AK293558 / AK304285 / BC001382 / BC008954 / ENST00000313248 / ENST00000371708 / ENST00000371713 / ENST00000371724 / ENST00000371731 / ENST00000371740 / ENST00000371755 / ENST00000393841 / ENST00000393844 / ENST00000427851 / ENST00000472176 / GENSCAN00000014398 / NM_001078174 / NM_001078175 / NM_001078176 / NM_001078177 / NM_004955 / OTTHUMT00000040715 / OTTHUMT000…	nucleobase-containing compound metabolic process / lactation / nucleoside transport / uridine transport / sleep / transmembrane transport / regulation of excitatory postsynaptic membrane potential / cellular response to glucose stimulus / cellular response to hypoxia / transport	plasma membrane/integral to plasma membrane/membrane/basolateral plasma membrane/apical plasma membrane/integral to membrane	nucleoside transmembrane transporter activity
LOC646862	0.183712	383	484	0	LOC646862	FALSE	TRUE	TRUE	FALSE	TRUE	TRUE	FALSE	TRUE	TRUE	0	0.0408974	0.00473697	11.0133	0.0213058	0.0167937	0.0224847	0.021438	0.0329168	0.00177183	0.0358753	0.0916408	0.00708059	0.00569878	0.142774	202	536	152	484	737	163	153	16866290	LOC646862	ENST00000601382 / GENSCAN00000006260 / NM_001195135 / uc021vcz.1	NA	NA	protein binding/zinc ion binding/metal ion binding
SLC28A3	0.183558	577	448	0	SLC28A3	FALSE	FALSE	FALSE	FALSE	TRUE	TRUE	FALSE	TRUE	TRUE	0	0.0290163	0.00137652	14.2703	0.0255189	0.014687	0.01694	0.0172794	0.145437	0.00028091	0.0184708	0.137379	0.0286353	0.019688	0.14309	203	1142	68	283	834	448	375	17095345	SLC28A3	AK304406 / ENST00000376238 / ENST00000495823 / ENST00000537648 / NM_001199633 / NM_022127 / NR_037638	pyrimidine nucleoside transport / transmembrane transport / transport / purine nucleoside transmembrane transport	plasma membrane/integral to membrane/membrane	nucleoside binding/pyrimidine- and adenine-specific:sodium symporter activity/purine-specific nucleoside:sodium symporter activity/nucleoside:sodium symporter activity
SRF	0.182459	712	835	22	SRF	FALSE	TRUE	FALSE	FALSE	FALSE	TRUE	FALSE	FALSE	FALSE	0.355369	0.0354954	0.00442137	5.74024	0.0333763	0.00798789	0.00897682	0.0108453	0.0647323	0.0576258	0.00595238	0.484916	0.242349	0.147512	0.145363	204	835	537	121	1201	967	1040	17008856	SRF	BC052572 / ENST00000265354 / ENST00000457278 / NM_003131	patterning of blood vessels / response to hypoxia / mesoderm formation / neuron migration / trophectodermal cell differentiation / heart looping / morphogenesis of an epithelial sheet / cell migration involved in sprouting angiogenesis / positive regulation of transcription from RNA polymerase II promoter involved in myocardial precursor cell differentiation / transcription from RNA polymerase II…	nuclear chromatin/nucleus/cytoplasm	RNA polymerase II core promoter proximal region sequence-specific DNA binding/RNA polymerase II core promoter sequence-specific DNA binding transcription factor activity/RNA polymerase II transcription factor binding transcription factor activity/RNA polymerase II core promoter proximal region sequence-specific DNA binding transcription factor activity involved in positive regulation of transcrip…
LOC646329	0.182416	442	469	0	LOC646329	FALSE	TRUE	TRUE	FALSE	FALSE	TRUE	TRUE	FALSE	FALSE	0	0.074803	0.00317971	4.33941	0.0403705	0.0221459	0.00575886	0.0113743	0.000646207	0.158847	0.00239528	0.0337342	0.539533	0.124951	0.145454	205	71	666	68	469	1229	995	17062945	AC058791.1 / LOC646329 / OTTHUMG00000043895	AK095549 / ENST00000418546 / ENST00000432045 / ENST00000447307 / ENST00000577311 / ENST00000579235 / ENST00000580851 / GU321462 / n377981 / n378377 / n378709 / n378789 / NR_034120 / OTTHUMT00000102291 / OTTHUMT00000338045 / OTTHUMT00000338046 / OTTHUMT00000469895 / OTTHUMT00000469896 / OTTHUMT00000469897 / TCONS_l2_00026893-XLOC_l2_014012 / TCONS_l2_00026894-XLOC_l2_014012 / TCONS_l2_00026896-XLO…	NA	NA	NA
ANLN	0.182412	628	895	1	ANLN	FALSE	TRUE	FALSE	FALSE	TRUE	FALSE	FALSE	TRUE	TRUE	0.0785596	0.0344097	0.00590776	14.0358	0.0115029	0.00508068	0.0169117	0.0144891	0.0741846	0.000318559	0.199127	0.758635	0.0288479	0.0467919	0.145461	206	895	74	902	1390	451	707	17045198	ANLN	AF273437 / AK094574 / AK291254 / AK299803 / BC034692 / BC070066 / ENST00000265748 / ENST00000396068 / ENST00000428612 / ENST00000429082 / ENST00000441696 / ENST00000446635 / ENST00000452877 / ENST00000457743 / ENST00000460598 / ENST00000491782 / ENST00000495714 / GENSCAN00000001460 / NM_018685 / OTTHUMT00000218582 / OTTHUMT00000337742 / OTTHUMT00000337743 / OTTHUMT00000337746 / OTTHUMT00000337747…	cytokinesis / septin ring assembly / mitosis / regulation of exit from mitosis / cell cycle / cell division	nucleus/actomyosin contractile ring/actin cytoskeleton/cytoplasm/cytoskeleton/cell cortex	actin binding/phospholipid binding/protein binding
ZNF117	0.182295	569	653	0	ZNF117	FALSE	TRUE	FALSE	FALSE	TRUE	TRUE	FALSE	FALSE	TRUE	0	0.03147	0.00169338	13.9499	0.0254384	0.015705	0.01463	0.0157098	0.107213	0.000333663	0.0186992	0.11291	0.0527501	0.0319521	0.145707	207	1056	76	287	783	653	541	17058142	ZNF117	BX647584 / ENST00000487644	transcription, DNA-dependent / regulation of transcription, DNA-dependent	nucleus	DNA binding/sequence-specific DNA binding transcription factor activity/zinc ion binding/nucleic acid binding/metal ion binding
SLC25A6	0.181957	632	258	0	SLC25A6	FALSE	TRUE	TRUE	FALSE	FALSE	TRUE	FALSE	TRUE	TRUE	0	0.0865628	0.019114	1.45255	0.029511	0.0153799	0.0198476	0.0199083	0.000191945	0.894962	0.0102252	0.1202	0.0135855	0.00892168	0.146416	208	45	1439	172	803	258	219	17101126	SLC25A6	ENST00000475167 / ENST00000484026	energy reserve metabolic process / protein targeting to mitochondrion / apoptotic process / viral reproduction / virus-host interaction / viral infectious cycle / cellular protein metabolic process / small molecule metabolic process / active induction of host immune response by virus / regulation of insulin secretion / transport / transmembrane transport	mitochondrial inner membrane/mitochondrial inner membrane presequence translocase complex/integral to membrane/mitochondrion/membrane	ATP:ADP antiporter activity/transporter activity
SLC25A6	0.181957	632	258	0	SLC25A6	FALSE	TRUE	TRUE	FALSE	FALSE	TRUE	FALSE	TRUE	TRUE	0	0.0865628	0.019114	1.45255	0.029511	0.0153799	0.0198476	0.0199083	0.000191945	0.894962	0.0102252	0.1202	0.0135855	0.00892168	0.146416	208	45	1439	172	803	258	219	17115881	SLC25A6	ENST00000475167 / ENST00000484026 / OTTHUMT00000055597 / OTTHUMT00000055598	energy reserve metabolic process / protein targeting to mitochondrion / apoptotic process / viral reproduction / virus-host interaction / viral infectious cycle / cellular protein metabolic process / small molecule metabolic process / active induction of host immune response by virus / regulation of insulin secretion / transport / transmembrane transport	mitochondrial inner membrane/mitochondrial inner membrane presequence translocase complex/integral to membrane/mitochondrion/membrane	ATP:ADP antiporter activity/transporter activity
E2F3-IT1	0.181754	562	346	0	E2F3 IT1	FALSE	TRUE	TRUE	FALSE	FALSE	TRUE	TRUE	FALSE	FALSE	0	0.0893526	0.00580528	2.68417	0.0250046	0.0242456	0.00580742	0.0104802	0.000145424	0.495809	0.0199846	0.0231347	0.533704	0.165316	0.146842	210	41	1024	303	346	1217	1068	17005248	E2F3-IT1	ENST00000433182 / OTTHUMT00000039983	NA	NA	NA
LRRC34	0.181512	609	905	0	LRRC34	FALSE	TRUE	FALSE	FALSE	TRUE	FALSE	FALSE	FALSE	FALSE	0	0.0342946	0.00426467	15.8698	0.0156713	0.0124443	0.00897357	0.0101102	0.0752636	0.000122198	0.0934366	0.211823	0.242558	0.185437	0.147353	211	905	41	735	941	968	1101	16961379	LRRC34	AK293661 / ENST00000316515 / ENST00000446859 / ENST00000518252 / ENST00000520726 / ENST00000522080 / ENST00000522329 / ENST00000522526 / ENST00000522596 / ENST00000524054 / ENST00000524327 / NM_001172779 / NM_001172780 / NM_153353	biological_process	cellular_component	molecular_function/protein binding
VTCN1	0.181511	630	677	1	VTCN1	FALSE	FALSE	FALSE	FALSE	TRUE	TRUE	FALSE	FALSE	FALSE	0.0785596	0.0312136	0.00263367	13.2006	0.0201097	0.0120489	0.0140802	0.0142441	0.1107	0.000502656	0.0436623	0.22856	0.0611279	0.0505362	0.147355	212	1065	91	568	957	677	739	16691459	VTCN1	BC065717 / ENST00000328189 / ENST00000359008 / ENST00000369458 / ENST00000463461 / ENST00000488493 / ENST00000539893 / NM_001253849 / NM_001253850 / NM_024626 / NR_045603 / NR_045604	response to protozoan / negative regulation of T cell activation / interleukin-4 secretion / interferon-gamma secretion	external side of plasma membrane/integral to membrane/plasma membrane/membrane	receptor binding/protein binding
TRIP13	0.180645	709	937	0	TRIP13	FALSE	FALSE	FALSE	FALSE	TRUE	FALSE	FALSE	TRUE	TRUE	0	0.0226463	0.00527033	17.0469	0.0107993	0.00836299	0.0208593	0.0179382	0.311895	6.80006e-05	0.226901	0.454136	0.0105507	0.0161067	0.149199	213	1320	31	937	1178	214	329	16982635	TRIP13	ENST00000166345 / ENST00000509210 / ENST00000510412 / ENST00000512024 / NM_001166260 / NM_004237 / U96131	oocyte maturation / double-strand break repair / transcription from RNA polymerase II promoter / synaptonemal complex assembly / reciprocal meiotic recombination / male meiosis I / female meiosis I / spermatogenesis / spermatid development / oogenesis / pachytene / meiosis / cell differentiation	male germ cell nucleus/nucleus	transcription cofactor activity/protein binding/ATP binding/nucleoside-triphosphatase activity/identical protein binding/nucleotide binding
VGF	0.180537	712	714	28	VGF	FALSE	TRUE	TRUE	FALSE	FALSE	FALSE	TRUE	FALSE	TRUE	0.381641	0.0375608	0.00896426	3.84539	0.0103197	0.0231849	0.0141527	0.0153387	0.0499534	0.226493	0.248072	0.0279595	0.0599488	0.0358677	0.149431	214	714	742	975	391	676	593	17060824	VGF	BC063835 / ENST00000249330 / ENST00000445482 / NM_003378	ovarian follicle development / response to dietary excess / generation of precursor metabolites and energy / response to cold / sexual reproduction / insulin secretion / response to insulin stimulus / glucose homeostasis / defense response to bacterium / response to cAMP	extracellular space/transport vesicle/cytoplasmic vesicle/extracellular region	neuropeptide hormone activity/growth factor activity/molecular_function
RNU6-51	0.180435	563	756	0	RNU6 51	FALSE	TRUE	TRUE	FALSE	FALSE	FALSE	TRUE	FALSE	TRUE	0	0.0855382	0.0161596	2.98482	0.00566122	0.0323829	0.012612	0.015328	0.00021275	0.409425	0.577328	0.00583732	0.0908617	0.0359878	0.14965	215	48	932	1267	106	756	596	16777272	RNU6-51	ENST00000516093	NA	NA	NA
WDR76	0.180133	721	844	0	WDR76	FALSE	FALSE	FALSE	FALSE	TRUE	FALSE	FALSE	TRUE	TRUE	0	0.0167013	0.00329414	17.792	0.0125474	0.00936884	0.021266	0.0185566	0.581032	4.74288e-05	0.164225	0.378893	0.00954055	0.0133594	0.1503	216	1428	20	844	1099	198	289	16800355	WDR76	EF011624 / ENST00000263795 / ENST00000478130 / NM_001167941 / NM_024908	NA	NA	protein binding
MCM10	0.179815	749	1163	0	MCM10	FALSE	FALSE	FALSE	FALSE	TRUE	FALSE	FALSE	TRUE	TRUE	0	0.0221739	0.00360177	15.3542	0.00255855	0.00856748	0.0347322	0.0276903	0.329109	0.000159061	0.890725	0.437969	0.000461091	0.00100522	0.150989	217	1335	47	1419	1163	17	36	16702571	MCM10	AB042719 / AF119869 / AK292701 / AL136840 / BC101727 / BC143490 / ENST00000378694 / ENST00000378714 / ENST00000481292 / ENST00000484800 / GENSCAN00000039117 / NM_018518 / NM_182751 / OTTHUMT00000046849 / OTTHUMT00000046850 / OTTHUMT00000356853 / OTTHUMT00000356856 / uc001ima.3 / uc001imb.3 / uc001imc.3	G1/S transition of mitotic cell cycle / mitotic cell cycle / DNA replication / cell cycle checkpoint / M/G1 transition of mitotic cell cycle	nucleus/nucleoplasm/nucleolus/cytoplasm	DNA binding/protein binding/metal ion binding/identical protein binding
HIST1H3I	0.179768	360	235	0	HIST1H3I	FALSE	TRUE	TRUE	FALSE	TRUE	FALSE	FALSE	TRUE	TRUE	0	0.0528171	0.00599104	9.26602	0.0172731	0.00874817	0.0255396	0.0220521	0.0076896	0.00522446	0.070593	0.424052	0.00342806	0.00477279	0.151091	218	208	235	679	1141	92	138	17016503	HIST1H3A / HIST1H3B / HIST1H3C / HIST1H3D / HIST1H3E / HIST1H3F / HIST1H3G / HIST1H3H / HIST1H3I / HIST1H3J	BC066884 / ENST00000328488 / NM_003533	nucleosome assembly / blood coagulation / S phase / regulation of gene silencing	nucleosome/extracellular region/nucleus/nucleoplasm/chromosome	DNA binding/protein binding/protein heterodimerization activity
GABBR2	0.179712	466	333	1	GABBR2	FALSE	TRUE	TRUE	FALSE	TRUE	FALSE	TRUE	TRUE	TRUE	0.0785596	0.0404119	0.00149557	7.46857	0.00557132	0.0284679	0.029876	0.027616	0.0349704	0.0171404	0.58609	0.0111363	0.00128955	0.00102525	0.151212	219	567	333	1274	184	37	37	17096493	GABBR2	AF056085 / ENST00000259455 / ENST00000477471 / NM_005458	G-protein coupled receptor signaling pathway / negative regulation of adenylate cyclase activity / gamma-aminobutyric acid signaling pathway / synaptic transmission / signal transduction	cytoplasm/plasma membrane/integral to plasma membrane/cell junction/neuron projection/postsynaptic membrane/membrane/integral to membrane/G-protein coupled receptor heterodimeric complex/synapse	G-protein coupled GABA receptor activity/signal transducer activity/G-protein coupled receptor activity/protein binding
TICRR	0.179536	747	1184	0	TICRR	FALSE	FALSE	FALSE	FALSE	TRUE	FALSE	FALSE	TRUE	FALSE	0	0.0273831	0.00182648	17.8216	0.00644961	0.00512249	0.0159879	0.0133822	0.177747	4.67623e-05	0.504125	0.754571	0.0367682	0.066304	0.151596	220	1184	19	1201	1382	531	818	16804631	TICRR	ENST00000268138 / ENST00000560985 / GQ227787 / NM_152259	cell cycle checkpoint / formation of translation preinitiation complex / DNA replication / DNA repair / cell cycle / response to ionizing radiation / regulation of DNA-dependent DNA replication initiation / mitotic DNA replication checkpoint / response to DNA damage stimulus	nucleus	chromatin binding/protein binding
PRKAR1A	0.178723	763	1100	3	PRKAR1A	FALSE	TRUE	TRUE	FALSE	FALSE	TRUE	FALSE	FALSE	FALSE	0.157119	0.0817333	0.00742168	1.70534	0.0313109	0.00646765	0.00717215	0.0090663	0.000313234	0.822027	0.00791887	0.622845	0.385961	0.255096	0.153377	221	57	1383	146	1304	1100	1202	16837326	PRKAR1A	AK097580 / BC036285 / BC093042 / ENST00000358598 / ENST00000392710 / ENST00000392711 / ENST00000536854 / ENST00000585427 / ENST00000585460 / ENST00000585608 / ENST00000585907 / ENST00000585981 / ENST00000586397 / ENST00000586541 / ENST00000588178 / ENST00000588188 / ENST00000588702 / ENST00000589017 / ENST00000589228 / ENST00000589480 / ENST00000592194 / ENST00000592800 / GENSCAN00000002952 / M18…	energy reserve metabolic process / regulation of transcription from RNA polymerase II promoter / water transport / signal transduction / epidermal growth factor receptor signaling pathway / activation of phospholipase C activity / blood coagulation / fibroblast growth factor receptor signaling pathway / activation of protein kinase A activity / intracellular signal transduction / small molecule m…	cytosol/plasma membrane/cAMP-dependent protein kinase complex/protein complex/cytoplasm/membrane/AMP-activated protein kinase complex/neuromuscular junction	protein binding/cAMP-dependent protein kinase regulator activity/cAMP binding/ubiquitin protein ligase binding/nucleotide binding/cAMP-dependent protein kinase inhibitor activity/protein kinase A catalytic subunit binding/kinase activity/cAMP-dependent protein kinase regulator activity / [WARNING: THIS FIELD TRUNCATED]
SLC20A2	0.17833	493	632	1	SLC20A2	FALSE	TRUE	TRUE	FALSE	FALSE	TRUE	FALSE	FALSE	FALSE	0.0785596	0.0721177	0.00551623	4.60033	0.0360125	0.0106512	0.00625642	0.00946856	0.000861564	0.131488	0.00418246	0.298356	0.481532	0.225833	0.154246	222	82	632	96	1028	1171	1154	17076773	SLC20A2	AK291202 / AK295952 / AL833040 / BC028600 / ENST00000342228 / ENST00000518384 / ENST00000518660 / ENST00000519463 / ENST00000520179 / ENST00000520262 / ENST00000522401 / ENST00000523340 / ENST00000524211 / ENST00000524237 / GENSCAN00000021429 / L20852 / n341490 / NM_001257180 / NM_001257181 / NM_006749 / OTTHUMT00000377578 / OTTHUMT00000377579 / OTTHUMT00000377580 / OTTHUMT00000377581 / OTTHUMT00…	transport / ion transport / virus-host interaction / transmembrane transport / sodium ion transport / phosphate ion transport / response to virus	plasma membrane/integral to plasma membrane/membrane/integral to membrane	receptor activity/inorganic phosphate transmembrane transporter activity/sodium:phosphate symporter activity/viral receptor activity/symporter activity
GPR87	0.177558	406	339	1	GPR87	FALSE	TRUE	TRUE	FALSE	FALSE	TRUE	TRUE	FALSE	TRUE	0.0785596	0.0559945	0.00688634	4.90706	0.0239819	0.0351626	0.00981038	0.0152167	0.00528414	0.105242	0.0234162	0.00375611	0.194012	0.0372591	0.155968	223	174	603	339	70	915	613	16960567	GPR87	AB031548 / ENST00000260843 / NM_023915	signal transduction / G-protein coupled receptor signaling pathway / negative regulation of adenylate cyclase activity / biological_process / G-protein coupled purinergic nucleotide receptor signaling pathway	plasma membrane/integral to membrane/membrane	G-protein coupled purinergic nucleotide receptor activity/signal transducer activity/G-protein coupled receptor activity
HIST1H1E	0.177433	372	255	0	HIST1H1E	FALSE	TRUE	TRUE	FALSE	TRUE	FALSE	FALSE	TRUE	TRUE	0	0.0502367	0.00456464	9.97561	0.012818	0.00984647	0.0250925	0.0215287	0.0104718	0.00333906	0.156271	0.346923	0.00380453	0.00555095	0.156248	224	255	197	831	1063	97	151	17005569	HIST1H1E	BC096168 / ENST00000304218 / NM_005321	nucleosome assembly / nucleosome positioning	nucleosome/nucleus/chromosome	DNA binding/protein binding
ANKRD33	0.177398	539	336	0	ANKRD33	FALSE	FALSE	FALSE	FALSE	TRUE	FALSE	TRUE	TRUE	TRUE	0	0.0312976	0.00107875	12.348	0.0141949	0.0244865	0.020775	0.0208452	0.109545	0.000811884	0.121654	0.0221679	0.0107738	0.00677217	0.156326	225	1062	112	774	336	216	173	16751363	ANKRD33	BC121152 / BC121153 / BX537908 / BX640656 / BX647684 / ENST00000301190 / ENST00000340970 / ENST00000538991 / ENST00000547119 / ENST00000548383 / ENST00000548526 / ENST00000549316 / ENST00000549751 / ENST00000550652 / GENSCAN00000002738 / NM_001130015 / NM_182608 / OTTHUMT00000404511 / OTTHUMT00000404512 / OTTHUMT00000404513 / OTTHUMT00000404514 / OTTHUMT00000404515 / OTTHUMT00000404516 / OTTHUMT0…	skeletal muscle cell differentiation	NA	protein binding
SOX9	0.177234	780	906	43	SOX9	FALSE	TRUE	TRUE	FALSE	FALSE	FALSE	TRUE	FALSE	FALSE	0.428891	0.0406878	0.00285332	3.05327	0.00643558	0.0284077	0.00533965	0.00927566	0.0337878	0.391393	0.505366	0.0112501	0.591138	0.239467	0.156697	226	551	906	1204	186	1261	1177	16837418	SOX9	BC056420 / ENST00000245479 / NM_000346	skeletal system development / cartilage condensation / ossification / branching involved in ureteric bud morphogenesis / cell fate specification / epithelial to mesenchymal transition / tissue homeostasis / positive regulation of protein phosphorylation / hair follicle development / positive regulation of mesenchymal cell proliferation / negative regulation of immune system process / heart valve …	nucleus/transcription factor complex/nucleolus/protein complex/chromatin remodeling complex	core promoter sequence-specific DNA binding/RNA polymerase II core promoter proximal region sequence-specific DNA binding transcription factor activity involved in positive regulation of transcription/enhancer sequence-specific DNA binding/chromatin binding/sequence-specific DNA binding transcription factor activity/RNA polymerase II distal enhancer sequence-specific DNA binding transcription fac…
IL18	0.177108	636	791	22	IL18	FALSE	TRUE	TRUE	FALSE	FALSE	TRUE	FALSE	FALSE	FALSE	0.355369	0.0489903	0.00639184	3.57482	0.0255509	0.00978412	0.00646479	0.00860852	0.012172	0.274161	0.018381	0.35096	0.458454	0.292434	0.156982	227	279	791	281	1069	1163	1249	16744415	IL18	AF077611 / AF380360 / AK311301 / AY044641 / AY266351 / BC007007 / BC007461 / BC015863 / CR541973 / CR542001 / D49950 / ENST00000280357 / ENST00000524595 / ENST00000525547 / ENST00000528832 / ENST00000533858 / ENST00000534225 / GENSCAN00000046188 / NM_001243211 / NM_001562 / OTTHUMT00000392409 / OTTHUMT00000392410 / OTTHUMT00000392411 / OTTHUMT00000392412 / OTTHUMT00000392413 / OTTHUMT00000392414 …	MAPK cascade / angiogenesis / osteoblast differentiation / response to hypoxia / inflammatory response / immune response / cell-cell signaling / response to radiation / response to cold / positive regulation of gene expression / regulation of cell adhesion / lung development / sleep / lipopolysaccharide-mediated signaling pathway / positive regulation of chemokine production / positive regulation…	extracellular region/extracellular space/cytosol/apical plasma membrane/cytoplasm	cytokine activity/protein binding
WEE1	0.176806	500	583	3	WEE1	FALSE	TRUE	TRUE	FALSE	TRUE	TRUE	FALSE	FALSE	FALSE	0.157119	0.0555453	0.00679044	8.33611	0.019946	0.00614536	0.00576817	0.00701252	0.00557002	0.00956632	0.0448646	0.654123	0.538413	0.459088	0.157664	228	179	278	583	1320	1226	1376	16721835	WEE1	BC051831 / BC070052 / BX641032 / ENST00000299613 / ENST00000450114 / ENST00000524549 / ENST00000524612 / ENST00000527848 / ENST00000530175 / ENST00000530712 / ENST00000532275 / GENSCAN00000011714 / NM_001143976 / NM_003390 / OTTHUMT00000386757 / OTTHUMT00000386758 / OTTHUMT00000386759 / OTTHUMT00000386760 / OTTHUMT00000386761 / OTTHUMT00000386762 / OTTHUMT00000386763 / OTTHUMT00000386764 / U10564…	G1/S transition of mitotic cell cycle / G2/M transition of mitotic cell cycle / microtubule cytoskeleton organization / mitotic cell cycle / mitosis / blood coagulation / peptidyl-tyrosine phosphorylation / establishment of cell polarity / neuron projection morphogenesis / cell division / regulation of cell cycle / protein phosphorylation / cell cycle / phosphorylation / cell cycle checkpoint / S…	nucleus/nucleoplasm/cytoplasm	magnesium ion binding/protein serine/threonine kinase activity/protein tyrosine kinase activity/non-membrane spanning protein tyrosine kinase activity/protein binding/ATP binding/nucleotide binding/protein kinase activity/kinase activity/transferase activity/transferase activity, transferring phosphorus-containing groups/metal ion binding
NABP1	0.176706	495	672	0	NABP1	FALSE	TRUE	TRUE	FALSE	TRUE	FALSE	FALSE	FALSE	TRUE	0	0.0376987	0.00480756	12.7321	0.0185409	0.0184334	0.0135386	0.0147712	0.0490968	0.000652995	0.0568062	0.0671202	0.070725	0.0428301	0.157892	229	703	104	649	672	711	670	16888963	NABP1	AK023686 / BC017114 / BC107723 / ENST00000307834 / ENST00000307849 / ENST00000409510 / ENST00000410026 / ENST00000425611 / ENST00000435931 / ENST00000451500 / ENST00000462712 / ENST00000491331 / GENSCAN00000020752 / n406921 / NM_001031716 / NM_001254736 / NR_045622 / NR_045623 / OTTHUMT00000256060 / OTTHUMT00000256061 / OTTHUMT00000334781 / OTTHUMT00000334782 / OTTHUMT00000334783 / OTTHUMT0000033…	cell cycle checkpoint / double-strand break repair via homologous recombination / DNA repair / response to DNA damage stimulus / response to ionizing radiation	nucleus/SOSS complex	single-stranded DNA binding/RNA binding/nucleic acid binding/DNA binding
KIF20A	0.176579	662	805	1	KIF20A	FALSE	FALSE	FALSE	FALSE	TRUE	FALSE	TRUE	FALSE	FALSE	0.0785596	0.0255589	0.00397621	13.3538	0.0135661	0.0249344	0.0107972	0.0133841	0.221651	0.000461864	0.136328	0.0204826	0.148653	0.0662625	0.15818	230	1242	86	805	319	854	817	16989636	KIF20A	AF070672 / AF153329 / AK296879 / BC012999 / ENST00000394894 / ENST00000502338 / ENST00000503417 / ENST00000504621 / ENST00000508792 / ENST00000511638 / ENST00000513276 / GENSCAN00000010012 / NM_005733 / OTTHUMT00000251272 / OTTHUMT00000373080 / OTTHUMT00000373081 / OTTHUMT00000373082 / OTTHUMT00000373083 / OTTHUMT00000373084 / OTTHUMT00000373085 / uc003lcj.3 / uc011cyo.2	mitotic cell cycle / cytokinesis / microtubule bundle formation / microtubule-based movement / protein transport / vesicle-mediated transport / transport / M phase of mitotic cell cycle	nucleoplasm/Golgi apparatus/spindle/microtubule/microtubule associated complex/cytoplasm/cytoskeleton/kinesin complex	microtubule motor activity/transporter activity/ATP binding/protein kinase binding/nucleotide binding/microtubule binding
VCL	0.175712	508	623	2	VCL	FALSE	TRUE	TRUE	FALSE	FALSE	TRUE	FALSE	TRUE	TRUE	0.124514	0.0657959	0.00933259	3.49599	0.0319046	0.00946817	0.0150247	0.0155053	0.00172325	0.28966	0.0072889	0.372047	0.0474725	0.0340522	0.160166	231	100	805	139	1096	623	566	16706200	VCL	BC039174 / ENST00000211998 / ENST00000372755 / ENST00000417648 / ENST00000436396 / ENST00000478896 / NM_003373 / NM_014000	morphogenesis of an epithelium / platelet degranulation / cellular component movement / muscle contraction / cell adhesion / cell-matrix adhesion / blood coagulation / lamellipodium assembly / platelet activation / negative regulation of cell migration / adherens junction assembly / protein localization to cell surface / apical junction assembly / epithelial cell-cell adhesion / regulation of cel…	extracellular region/cytosol/cytoskeleton/cell-cell junction/adherens junction/cell-cell adherens junction/fascia adherens/focal adhesion/actin cytoskeleton/Z disc/cell-substrate junction/sarcolemma/costamere/protein complex/cytoplasm/plasma membrane/intercalated disc/membrane/cell junction	dystroglycan binding/actin binding/structural molecule activity/protein binding/beta-catenin binding/Rho GTPase binding/alpha-catenin binding/cadherin binding
ENDOD1	0.175602	565	660	0	ENDOD1	FALSE	TRUE	FALSE	FALSE	TRUE	TRUE	FALSE	FALSE	TRUE	0	0.0323706	0.0036735	13.2968	0.0249675	0.0152086	0.0145122	0.0154996	0.0957958	0.000476614	0.0200989	0.124232	0.0544389	0.0341131	0.160419	232	1015	89	304	810	660	567	16730308	ENDOD1	AK291673 / ENST00000278505 / ENST00000577165 / NM_015036	nucleic acid phosphodiester bond hydrolysis	extracellular region	nucleic acid binding/endonuclease activity/metal ion binding/nuclease activity/hydrolase activity
ILK	0.175147	841	593	36	ILK	FALSE	TRUE	TRUE	FALSE	FALSE	TRUE	TRUE	FALSE	FALSE	0.409252	0.0414296	0.00528311	1.73005	0.0197574	0.0239593	0.00896127	0.0123606	0.0308069	0.814209	0.0462949	0.024343	0.243349	0.091552	0.161474	233	512	1370	593	363	970	914	16721479	ILK	AB209416 / AJ277481 / AK293474 / AK296628 / BC001554 / CR407673 / ENST00000299421 / ENST00000396751 / ENST00000420936 / ENST00000526114 / ENST00000526711 / ENST00000527121 / ENST00000527327 / ENST00000527394 / ENST00000528784 / ENST00000528995 / ENST00000530016 / ENST00000532063 / ENST00000534565 / ENST00000534706 / ENST00000537806 / GENSCAN00000023859 / NM_001014794 / NM_001014795 / NM_004517 / …	branching involved in ureteric bud morphogenesis / positive regulation of cell-matrix adhesion / protein phosphorylation / negative regulation of protein kinase activity / cell cycle arrest / cell-matrix adhesion / integrin-mediated signaling pathway / cell aging / cell proliferation / positive regulation of cell proliferation / negative regulation of cardiac muscle cell apoptotic process / negat…	cytoplasm/cytosol/plasma membrane/cell-cell junction/focal adhesion/sarcomere/lamellipodium/neuronal cell body/costamere/terminal bouton/dendritic shaft/protein complex/membrane/cell junction/axon/cell projection	protein serine/threonine kinase activity/signal transducer activity/integrin binding/protein binding/ATP binding/SH3 domain binding/protein kinase binding/nucleotide binding/protein kinase activity/kinase activity/transferase activity/transferase activity, transferring phosphorus-containing groups/protein tyrosine kinase activity/[WARNING: THIS FIELD TRUNCATED]
MAD2L1	0.174586	672	940	2	MAD2L1	FALSE	FALSE	FALSE	FALSE	TRUE	FALSE	FALSE	TRUE	TRUE	0.124514	0.0280261	0.01063	10.3335	0.0107672	0.0110592	0.0297079	0.0250214	0.164294	0.00267606	0.228259	0.276163	0.00133791	0.00206884	0.162782	234	1173	180	940	1006	39	67	16979389	MAD2L1	BC005945 / ENST00000296509 / ENST00000333047 / ENST00000504707 / ENST00000511295 / ENST00000512484 / NM_002358	mitotic sister chromatid segregation / mitotic cell cycle / mitotic cell cycle checkpoint / mitotic spindle assembly checkpoint / anaphase-promoting complex-dependent proteasomal ubiquitin-dependent protein catabolic process / negative regulation of protein catabolic process / negative regulation of apoptotic process / cell division / negative regulation of ubiquitin-protein ligase activity invol…	kinetochore/condensed chromosome kinetochore/spindle pole/nucleus/nuclear pore/cytosol/perinuclear region of cytoplasm/mitotic spindle/chromosome, centromeric region/chromosome/cytoplasm/cytoskeleton	protein binding/protein homodimerization activity/identical protein binding
MIR548O2	0.174494	534	419	0	MIR548O2	FALSE	TRUE	TRUE	FALSE	FALSE	TRUE	TRUE	FALSE	FALSE	0	0.0824072	0.0102363	2.68339	0.0261484	0.0227877	0.0102414	0.0136581	0.000292332	0.496048	0.0167872	0.0300323	0.172754	0.0607772	0.162998	235	55	1025	258	419	888	799	16913617	MIR548O2	hsa-mir-548o-2 / NR_039605	NA	NA	NA
CDT1	0.174081	766	1224	2	CDT1	FALSE	FALSE	FALSE	FALSE	TRUE	FALSE	FALSE	TRUE	TRUE	0.124514	0.0260501	0.007012	14.0297	0.00387766	0.00509414	0.0202438	0.016355	0.208946	0.000319606	0.761052	0.757327	0.0122996	0.0261604	0.163972	236	1224	75	1367	1386	240	468	16821869	CDT1	AB053172 / ENST00000301019 / ENST00000562747 / NM_030928	DNA replication checkpoint / G1/S transition of mitotic cell cycle / regulation of transcription involved in G1/S phase of mitotic cell cycle / mitotic cell cycle / DNA replication / regulation of DNA-dependent DNA replication initiation / cell cycle / S phase of mitotic cell cycle / M/G1 transition of mitotic cell cycle / regulation of S phase of mitotic cell cycle	nucleus/nucleoplasm/cytosol	DNA binding/protein binding
OTTHUMG00000159060	0.173486	430	151	0	OTTHUMG00000159060	FALSE	TRUE	TRUE	FALSE	FALSE	TRUE	FALSE	TRUE	TRUE	0	0.0589558	0.00725996	3.65603	0.0333419	0.0120511	0.0341749	0.0304182	0.00374446	0.258975	0.00598038	0.228463	0.000517134	0.000494143	0.165382	237	151	773	123	956	19	22	16943230	CTD-2021J15.2 / LOC100506377 / OTTHUMG00000159060	ENST00000473756 / n365961 / OTTHUMT00000353102 / TCONS_00005559-XLOC_002736 / XR_171397	NA	NA	NA
HSPA1A	0.173047	688	1014	1	HSPA1A	FALSE	TRUE	FALSE	FALSE	TRUE	FALSE	FALSE	FALSE	FALSE	0.0785596	0.0322042	0.00124253	14.1107	0.00896363	0.0145656	0.00839931	0.00947404	0.0978115	0.000305988	0.319232	0.140638	0.282115	0.225456	0.166431	238	1022	72	1051	845	1014	1153	17006863	HSPA1A / HSPA1B	AK291295 / AK294182 / AK295398 / AK298056 / AK298078 / AK298098 / AK301243 / AK301574 / AK303980 / AK304618 / AK304652 / BC002453 / ENST00000375651 / ENST00000383389 / ENST00000400040 / ENST00000422919 / ENST00000430065 / ENST00000433487 / ENST00000441618 / ENST00000449876 / ENST00000452298 / ENST00000458062 / ENST00000545241 / ENST00000547145 / ENST00000548079 / ENST00000549607 / ENST00000550810…	mRNA catabolic process / response to stress / response to unfolded protein / negative regulation of cell proliferation / response to virus / gene expression / RNA metabolic process / mRNA metabolic process / negative regulation of cell growth / protein refolding / negative regulation of apoptotic process / positive regulation of erythrocyte differentiation / negative regulation of inclusion body …	nucleus/cytoplasm/mitochondrion/endoplasmic reticulum/cytosol/signalosome/inclusion body/aggresome/nuclear speck/ribonucleoprotein complex/perinuclear region of cytoplasm/perinuclear region of cytoplasm / [WARNING: THIS FIELD TRUNCATED]	nucleotide binding/viral receptor activity/protein binding/ATP binding/ubiquitin protein ligase binding/protein binding involved in protein folding/protein N-terminus binding/unfolded protein binding
LY96	0.172837	396	463	0	LY96	FALSE	TRUE	TRUE	FALSE	TRUE	FALSE	TRUE	TRUE	TRUE	0	0.043177	0.00755436	10.5982	0.0167549	0.0203822	0.0167088	0.0173249	0.0248025	0.00227632	0.0772405	0.0466252	0.0304202	0.0194164	0.166937	239	433	173	694	587	463	373	17070061	LY96	AB018549 / ENST00000284818 / ENST00000518893 / NM_001195797 / NM_015364	toll-like receptor signaling pathway / MyD88-dependent toll-like receptor signaling pathway / MyD88-independent toll-like receptor signaling pathway / inflammatory response / cellular defense response / cell surface receptor signaling pathway / I-kappaB kinase/NF-kappaB cascade / lipopolysaccharide-mediated signaling pathway / response to lipopolysaccharide / detection of lipopolysaccharide / tol…	extracellular space/plasma membrane/endosome membrane/lipopolysaccharide receptor complex/extracellular region	lipopolysaccharide receptor activity/protein binding/coreceptor activity
ARHGEF38	0.172757	571	898	0	ARHGEF38	FALSE	FALSE	FALSE	FALSE	TRUE	FALSE	FALSE	TRUE	TRUE	0	0.0343798	0.00458431	10.911	0.0106082	0.0112472	0.0351972	0.0291565	0.0744631	0.00188404	0.235108	0.266455	0.000419275	0.000683969	0.167127	240	898	158	957	1000	14	28	16969439	ARHGEF38 / OTTHUMG00000161140 / RP11-311D14.2	ENST00000265154 / ENST00000420470 / ENST00000503289 / ENST00000506828 / ENST00000508036 / ENST00000510406 / GENSCAN00000022507 / GENSCAN00000040320 / NM_001242729 / NM_017700 / OTTHUMT00000336934 / OTTHUMT00000363672 / OTTHUMT00000363673 / OTTHUMT00000363877 / OTTHUMT00000363878 / OTTHUMT00000363919 / uc003hxu.3 / uc003hxv.2	regulation of Rho protein signal transduction	intracellular/cytoplasm	Rho guanyl-nucleotide exchange factor activity/guanyl-nucleotide exchange factor activity/protein binding/protein domain specific binding
HMGA2	0.172521	661	330	4	HMGA2	FALSE	TRUE	TRUE	FALSE	FALSE	TRUE	TRUE	FALSE	TRUE	0.18241	0.0466318	0.00576677	2.17327	0.034294	0.0435285	0.00607913	0.0146719	0.0162161	0.664239	0.0052568	0.00108039	0.501747	0.0441839	0.167699	241	330	1213	114	18	1190	684	16753641	HMGA2	AB209853 / ENST00000354636 / ENST00000403681 / ENST00000537275 / ENST00000537429 / ENST00000539662 / ENST00000545998 / NM_003483 / NM_003484	negative regulation of transcription from RNA polymerase II promoter / epithelial to mesenchymal transition / chondrocyte differentiation / mesodermal-endodermal cell signaling / base-excision repair / chromatin organization / regulation of transcription, DNA-dependent / mitosis / mitotic G2 DNA damage checkpoint / multicellular organismal development / spermatogenesis / male gonad development / …	nuclear chromosome/nucleus/protein-DNA complex/senescence-associated heterochromatin focus/SMAD protein complex/chromatin	regulatory region DNA binding/protein binding transcription factor activity/core promoter binding/nucleic acid binding transcription factor activity/RNA polymerase II core promoter proximal region sequence-specific DNA binding transcription factor activity involved in positive regulation of transcription/RNA polymerase II core promoter proximal region sequence-specific DNA binding transcription f…
PELI1	0.172252	614	880	0	PELI1	FALSE	FALSE	FALSE	FALSE	TRUE	FALSE	FALSE	TRUE	TRUE	0	0.0309232	0.00394583	12.9034	0.00885023	0.0139107	0.026905	0.0232347	0.114782	0.000593126	0.326015	0.159604	0.00250362	0.00340676	0.16835	242	1075	97	1059	880	71	101	16898326	PELI1	BC050019 / ENST00000358912 / ENST00000466177 / ENST00000468869 / ENST00000494203 / NM_020651	positive regulation of cytokine production / toll-like receptor signaling pathway / MyD88-dependent toll-like receptor signaling pathway / Toll signaling pathway / positive regulation of B cell proliferation / positive regulation of protein ubiquitination / negative regulation of NF-kappaB transcription factor activity / response to lipopolysaccharide / toll-like receptor 2 signaling pathway / po…	nucleus/cytosol	ubiquitin-protein ligase activity/protein binding/ligase activity
PRIM1	0.172162	712	1135	0	PRIM1	FALSE	FALSE	FALSE	FALSE	TRUE	FALSE	FALSE	TRUE	TRUE	0	0.0292899	0.00681488	15.755	0.00300596	0.0064365	0.0223995	0.0181229	0.1406	0.000129538	0.849623	0.625848	0.00722859	0.0152297	0.168568	243	1135	42	1405	1307	164	316	16766318	PRIM1	BC005266 / ENST00000338193 / ENST00000548173 / ENST00000550224 / ENST00000552408 / ENST00000552590 / NM_000946	G1/S transition of mitotic cell cycle / mitotic cell cycle / telomere maintenance via recombination / telomere maintenance / DNA replication, synthesis of RNA primer / DNA replication initiation / DNA strand elongation involved in DNA replication / telomere maintenance via semi-conservative replication / DNA replication / S phase of mitotic cell cycle / M/G1 transition of mitotic cell cycle	nucleoplasm/primosome complex/replisome	DNA primase activity/metal ion binding/DNA-directed RNA polymerase activity/transferase activity/nucleotidyltransferase activity/protein binding
ZBTB38	0.171149	418	474	0	ZBTB38	FALSE	TRUE	TRUE	FALSE	TRUE	TRUE	TRUE	FALSE	FALSE	0	0.0664082	0.00767982	6.23344	0.0344518	0.0210382	0.00336833	0.00890359	0.00160975	0.0405207	0.0051465	0.0413082	0.839822	0.267861	0.171048	244	95	474	111	535	1409	1224	16946366	ZBTB38	AK311501 / ENST00000507657 / ENST00000509842 / ENST00000512276 / ENST00000513619 / ENST00000514251 / NM_001080412 / OTTHUMT00000359329 / OTTHUMT00000359330 / OTTHUMT00000359331 / OTTHUMT00000359401 / OTTHUMT00000359402 / uc003etw.3 / uc003ety.3 / uc010hun.3 / uc010huo.3 / uc010hup.3	transcription, DNA-dependent / positive regulation of transcription from RNA polymerase II promoter / regulation of transcription, DNA-dependent	nucleus/nucleolus/intracellular	DNA binding/sequence-specific DNA binding transcription factor activity/zinc ion binding/nucleic acid binding/metal ion binding/protein binding
SBDSP1	0.170919	573	106	0	SBDSP1	FALSE	TRUE	TRUE	FALSE	FALSE	TRUE	FALSE	TRUE	TRUE	0	0.068345	0.0182654	1.92105	0.0349307	0.0154999	0.028455	0.0268354	0.00129946	0.751103	0.00482691	0.117455	0.00176513	0.00126291	0.171615	245	91	1310	106	797	53	44	17046838	SBDSP1	NR_001588 / NR_024109 / NR_024110 / NR_024111 / TCONS_l2_00025998-XLOC_l2_013473 / TCONS_l2_00025999-XLOC_l2_013473 / TCONS_l2_00026000-XLOC_l2_013473 / TCONS_l2_00026002-XLOC_l2_013473 / TCONS_l2_00026003-XLOC_l2_013473 / TCONS_l2_00026004-XLOC_l2_013473 / TCONS_l2_00026005-XLOC_l2_013473 / TCONS_l2_00027137-XLOC_l2_013473	NA	NA	NA
ATG9B	0.170902	427	369	0	ATG9B	FALSE	TRUE	TRUE	FALSE	TRUE	FALSE	FALSE	TRUE	TRUE	0	0.0452643	0.00632895	8.72455	0.0153914	0.0084434	0.0336237	0.0279076	0.0191742	0.0074115	0.0981919	0.447726	0.000579731	0.000948972	0.171656	246	369	266	742	1172	20	35	17064325	ATG9B	AK027791 / AK096734 / AY316116 / AY515311 / BC128587 / ENST00000377974 / ENST00000404733 / ENST00000444312 / ENST00000464855 / ENST00000466157 / ENST00000469530 / ENST00000473134 / ENST00000473409 / ENST00000473698 / ENST00000476282 / ENST00000486407 / ENST00000494791 / GENSCAN00000006085 / NM_173681 / NR_073169 / OTTHUMT00000351543 / OTTHUMT00000351544 / OTTHUMT00000351545 / OTTHUMT00000351546 /…	autophagic vacuole assembly / autophagy	autophagic vacuole membrane/integral to membrane/cytoplasmic vesicle/cytoplasm/autophagic vacuole/membrane	NA
ATP2B4	0.170877	644	922	1	ATP2B4	FALSE	TRUE	FALSE	FALSE	TRUE	FALSE	TRUE	FALSE	FALSE	0.0785596	0.0322073	0.00392237	12.121	0.00567598	0.0278865	0.00967653	0.0123781	0.0977729	0.000924657	0.575896	0.0122893	0.201106	0.0910463	0.17172	247	1021	117	1266	196	922	913	16676183	ATP2B4	AK026443 / AK292458 / AK307104 / BC140774 / BC150293 / BX537444 / BX537745 / BX647701 / ENST00000341360 / ENST00000357681 / ENST00000367218 / ENST00000367219 / ENST00000391954 / ENST00000458092 / ENST00000484746 / GENSCAN00000017417 / M25874 / M83363 / n326267 / NM_001001396 / NM_001684 / OTTHUMT00000087462 / OTTHUMT00000087463 / OTTHUMT00000087464 / OTTHUMT00000087465 / uc001gzv.3 / uc001gzw.3 /…	transport / blood coagulation / ion transmembrane transport / transmembrane transport / ion transport / cation transport / calcium ion transport / calcium ion transmembrane transport / negative regulation of peptidyl-cysteine S-nitrosylation / ATP biosynthetic process / metabolic process / neural retina development	plasma membrane/integral to plasma membrane/membrane/integral to membrane/protein complex	calcium-transporting ATPase activity/protein binding/calmodulin binding/ATP binding/metal ion binding/nucleotide binding/hydrolase activity/sodium channel regulator activity/cation-transporting ATPase activity/scaffold protein binding/catalytic activity/ATPase activity, coupled to transmembrane movement of ions, phosphorylative mechanism/hydrolase activity, acting on acid anhydrides, catalyzing t…
UBC	0.170782	769	969	37	UBC	FALSE	TRUE	TRUE	FALSE	FALSE	TRUE	FALSE	FALSE	FALSE	0.412275	0.0417905	0.00711098	2.83682	0.0302538	0.011107	0.00387009	0.00727488	0.0294552	0.450518	0.00919422	0.273665	0.779616	0.427753	0.171955	248	490	969	163	1004	1375	1361	16772172	UBC	AK097415 / ENST00000339647 / ENST00000535131 / ENST00000535859 / ENST00000536661 / ENST00000536769 / ENST00000538617 / ENST00000540351 / ENST00000540700 / ENST00000541046 / ENST00000541272 / ENST00000541645 / ENST00000542416 / ENST00000544481 / ENST00000546271 / NM_021009 / OTTHUMT00000400177 / OTTHUMT00000400179 / OTTHUMT00000400180 / OTTHUMT00000400183 / OTTHUMT00000400185 / OTTHUMT00000400186 …	G1/S transition of mitotic cell cycle / negative regulation of transcription from RNA polymerase II promoter / activation of MAPK activity / protein polyubiquitination / mitotic cell cycle / toll-like receptor signaling pathway / antigen processing and presentation of peptide antigen via MHC class I / antigen processing and presentation of exogenous peptide antigen via MHC class I, TAP-dependent …	nucleoplasm/cytosol/endosome membrane/endocytic vesicle membrane/nucleus/cytoplasm/plasma membrane	protease binding/protein binding
DSCC1	0.169611	652	970	0	DSCC1	FALSE	FALSE	FALSE	FALSE	TRUE	FALSE	FALSE	TRUE	TRUE	0	0.0282467	0.0098378	13.569	0.00857693	0.0117707	0.0267276	0.0227223	0.159903	0.000410394	0.34293	0.241087	0.00260707	0.00394001	0.174882	249	1166	81	1080	970	77	111	17080595	DSCC1	BC001316 / ENST00000313655 / ENST00000521795 / NM_024094	DNA replication / regulation of DNA replication / maintenance of mitotic sister chromatid cohesion / post-translational protein acetylation / cell cycle	chromosome, centromeric region/chromatin/nucleoplasm/nucleus	DNA binding/protein binding
LOC100130887	0.168909	774	1249	0	LOC100130887	FALSE	FALSE	FALSE	FALSE	TRUE	TRUE	FALSE	FALSE	FALSE	0	0.0241135	0.000985356	17.7468	0.0218666	0.0054604	0.00547643	0.00683961	0.263118	4.84654e-05	0.0327591	0.721481	0.574063	0.480535	0.176663	250	1281	21	449	1363	1249	1384	16710017	LOC100130887	ENST00000437593	NA	NA	NA
CRLF2	0.168906	756	1038	1	CRLF2	FALSE	FALSE	FALSE	FALSE	TRUE	TRUE	FALSE	FALSE	FALSE	0.0785596	0.0238543	0.00335483	15.1817	0.0195017	0.0103792	0.00678051	0.00844038	0.271229	0.000173897	0.0483141	0.31405	0.42496	0.307281	0.176672	251	1287	50	613	1038	1138	1266	17108694	CRLF2	ENST00000381567 / ENST00000400841 / ENST00000467626 / GENSCAN00000022793 / OTTHUMT00000144413 / OTTHUMT00000144414 / uc022brs.1 / uc022brt.1 / uc022ciq.1 / uc022cir.1	NA	extracellular region/plasma membrane/integral to membrane/membrane	protein binding
CDC45	0.168895	782	1304	1	CDC45	FALSE	FALSE	FALSE	FALSE	TRUE	FALSE	FALSE	TRUE	TRUE	0.0785596	0.0201344	0.00513591	14.8379	0.0051409	0.0059746	0.0244234	0.0197417	0.4121	0.000208027	0.629062	0.670852	0.00445223	0.00937311	0.1767	252	1375	55	1304	1333	113	228	16927052	CDC45	AF053074 / AF062495 / AF081535 / AK293123 / AK293338 / AK302590 / AK303274 / AY358971 / BC006232 / BC010022 / BT006792 / CT841513 / ENST00000263201 / ENST00000404724 / ENST00000407835 / ENST00000428937 / ENST00000437685 / ENST00000438587 / ENST00000455750 / ENST00000471470 / ENST00000483431 / ENST00000487669 / ENST00000491520 / ENST00000493724 / GENSCAN00000011798 / NM_001178010 / NM_001178011 / …	DNA replication checkpoint / G1/S transition of mitotic cell cycle / regulation of transcription involved in G1/S phase of mitotic cell cycle / mitotic cell cycle / DNA replication / DNA replication initiation / DNA strand elongation involved in DNA replication / cell cycle / cell cycle checkpoint / S phase of mitotic cell cycle / M/G1 transition of mitotic cell cycle	nucleus/nucleoplasm/cytoplasm/centrosome	protein binding
RASA2-IT1	0.16879	427	134	0	RASA2 IT1	FALSE	TRUE	TRUE	FALSE	FALSE	TRUE	TRUE	FALSE	TRUE	0	0.0643122	0.0100233	3.64963	0.0379908	0.0306685	0.00894532	0.0149863	0.00203449	0.260143	0.00323501	0.00771716	0.244379	0.0400412	0.176968	253	109	776	79	134	973	637	16946426	RASA2-IT1	ENST00000507770 / OTTHUMT00000359732	NA	NA	NA
DIAPH3	0.168533	743	1212	1	DIAPH3	FALSE	FALSE	FALSE	FALSE	TRUE	FALSE	FALSE	TRUE	TRUE	0.0785596	0.0264017	0.00727458	14.1206	0.00541819	0.00546509	0.021523	0.0175046	0.200263	0.000304355	0.601194	0.721019	0.00895535	0.0183792	0.177623	254	1212	71	1283	1362	192	353	16779546	DIAPH3	AY750055 / ENST00000267215 / ENST00000377908 / ENST00000400319 / ENST00000400320 / ENST00000400324 / ENST00000400330 / ENST00000465066 / ENST00000498416 / NM_001042517 / NM_001258366 / NM_001258367 / NM_001258368 / NM_001258369 / NM_001258370 / NM_030932	actin cytoskeleton organization / cellular component organization	cytosol/cytoplasm	actin binding/Rho GTPase binding/binding
LIFR	0.168484	798	714	17	LIFR	FALSE	FALSE	FALSE	FALSE	TRUE	FALSE	FALSE	TRUE	TRUE	0.327587	0.0281101	0.00625513	6.03033	0.00632931	0.0174053	0.0206062	0.0188829	0.16261	0.0468207	0.514847	0.0815549	0.0112359	0.0121108	0.17775	255	1171	506	1214	714	223	272	16995500	LIFR	AK290059 / AK309882 / ENST00000263409 / ENST00000453190 / ENST00000503088 / ENST00000506003 / ENST00000506990 / ENST00000507786 / ENST00000508477 / ENST00000512723 / GENSCAN00000044067 / NM_001127671 / NM_002310 / OTTHUMT00000253823 / OTTHUMT00000367349 / OTTHUMT00000367350 / OTTHUMT00000367351 / OTTHUMT00000367353 / OTTHUMT00000367354 / OTTHUMT00000367355 / OTTHUMT00000367356 / uc003jli.2 / uc01…	cell surface receptor signaling pathway / positive regulation of cell proliferation / cytokine-mediated signaling pathway / response to cytokine stimulus / oncostatin-M-mediated signaling pathway / leukemia inhibitory factor signaling pathway / ciliary neurotrophic factor-mediated signaling pathway / organ regeneration / response to chemical stimulus / neuron projection morphogenesis	extracellular region/integral to plasma membrane/plasma membrane/membrane/integral to membrane	ciliary neurotrophic factor receptor activity/leukemia inhibitory factor receptor activity/oncostatin-M receptor activity/ciliary neurotrophic factor receptor binding/growth factor binding/cytokine receptor activity/protein binding/cytokine binding
EME1	0.168313	627	847	2	EME1	FALSE	TRUE	FALSE	FALSE	TRUE	FALSE	FALSE	FALSE	FALSE	0.124514	0.0358336	0.00385571	11.7935	0.0118168	0.0093418	0.010913	0.0107265	0.0620413	0.00111769	0.187893	0.380775	0.144061	0.153094	0.17819	256	810	125	883	1104	847	1048	16835797	EME1	AK021607 / AK308275 / BC016470 / ENST00000338165 / ENST00000393271 / ENST00000507616 / ENST00000510007 / ENST00000510246 / ENST00000511519 / ENST00000511648 / ENST00000513077 / ENST00000514211 / GENSCAN00000001883 / NM_001166131 / NM_152463 / OTTHUMT00000367118 / OTTHUMT00000367119 / OTTHUMT00000367120 / OTTHUMT00000367122 / OTTHUMT00000367124 / OTTHUMT00000367125 / OTTHUMT00000367126 / OTTHUMT00…	DNA repair / DNA recombination / response to DNA damage stimulus / nucleic acid phosphodiester bond hydrolysis / DNA metabolic process	nucleolus/nucleus	DNA binding/endonuclease activity/protein binding/metal ion binding/nuclease activity/hydrolase activity
SCARNA9	0.167986	696	740	0	SCARNA9	FALSE	TRUE	TRUE	FALSE	FALSE	TRUE	FALSE	FALSE	FALSE	0	0.0809838	0.0296618	1.4244	0.0453317	0.0166956	0.00895021	0.0132729	0.000338336	0.902104	0.00131563	0.0933762	0.244063	0.0686306	0.179032	257	58	1444	45	740	971	835	16730104	SCARNA9 / SCARNA9L	ENST00000530422 / NR_002569	NA	NA	NA
COX7B	0.167527	494	155	0	COX7B	FALSE	TRUE	TRUE	FALSE	FALSE	TRUE	TRUE	TRUE	TRUE	0	0.0603491	0.0184329	2.50915	0.0444243	0.0205409	0.0229024	0.0243023	0.00318988	0.551033	0.00146417	0.0452758	0.00640022	0.00252495	0.180221	258	138	1083	50	579	155	82	17105010	COX7B	BC018386 / BT009767 / CR450332 / CR542124 / ENST00000373335 / ENST00000475465 / ENST00000481445 / ENST00000597485 / ENST00000598404 / ENST00000600994 / NM_001866 / OTTHUMT00000058970 / OTTHUMT00000058971 / OTTHUMT00000058972 / uc004ecu.1 / Z14244	central nervous system development / respiratory electron transport chain / small molecule metabolic process / cellular metabolic process	mitochondrial inner membrane/mitochondrial respiratory chain/integral to membrane/mitochondrion/membrane	cytochrome-c oxidase activity
S100A10	0.167366	641	873	3	S100A10	FALSE	TRUE	FALSE	FALSE	TRUE	TRUE	FALSE	FALSE	FALSE	0.157119	0.0348987	0.00329367	10.6924	0.0238998	0.00808836	0.00705398	0.00863019	0.0697674	0.0021498	0.0237188	0.476531	0.397427	0.290565	0.18064	259	873	169	341	1194	1107	1248	16693272	S100A10	BC105786 / ENST00000368809 / ENST00000368811 / ENST00000478348 / ENST00000478574 / NM_002966	signal transduction / positive regulation of binding / cellular response to acid	extrinsic to plasma membrane	receptor binding/calcium ion binding
ANXA3	0.167171	729	875	5	ANXA3	FALSE	TRUE	FALSE	FALSE	TRUE	FALSE	FALSE	FALSE	FALSE	0.203074	0.031945	0.00350729	10.8883	0.0129752	0.00670722	0.0104343	0.0100249	0.101034	0.00190996	0.15184	0.599937	0.163988	0.190391	0.181151	260	1032	159	826	1287	875	1108	16968213	ANXA3	AB209868 / BC000871 / CR407648 / ENST00000264908 / ENST00000503570 / ENST00000503776 / ENST00000505805 / ENST00000508214 / ENST00000510502 / ENST00000512373 / ENST00000512542 / ENST00000512884 / ENST00000514171 / GENSCAN00000031007 / M20560 / M63310 / NM_005139 / OTTHUMT00000252516 / OTTHUMT00000362870 / OTTHUMT00000362871 / OTTHUMT00000362872 / OTTHUMT00000363490 / OTTHUMT00000363491 / OTTHUMT00…	phagocytosis / positive regulation of endothelial cell migration / defense response to bacterium / neutrophil degranulation / positive regulation of angiogenesis / positive regulation of sequence-specific DNA binding transcription factor activity / hippocampus development / organ regeneration / positive regulation of DNA metabolic process / response to glucocorticoid stimulus / response to growth…	cytoplasm/plasma membrane/membrane/phagocytic vesicle membrane/specific granule/axon/dendrite/neuronal cell body	calcium ion binding/calcium-dependent phospholipid binding/phospholipase A2 inhibitor activity/phospholipase inhibitor activity
NPM1	0.166807	528	665	3	NPM1	FALSE	TRUE	TRUE	FALSE	FALSE	TRUE	FALSE	FALSE	TRUE	0.157119	0.0610941	0.00686283	3.83422	0.0236495	0.00935804	0.0144543	0.0143712	0.00292925	0.2283	0.0246674	0.379644	0.0552895	0.0485571	0.182105	261	134	745	350	1101	665	725	16992324	NPM1	ENST00000296930 / ENST00000351986 / ENST00000393820 / ENST00000519955 / NM_001037738 / NM_002520 / NM_199185	DNA repair / nucleosome assembly / intracellular protein transport / nucleocytoplasmic transport / response to stress / centrosome cycle / signal transduction / cell aging / protein localization / negative regulation of cell proliferation / negative regulation of centrosome duplication / viral reproduction / virus-host interaction / regulation of endodeoxyribonuclease activity / CENP-A containing…	nucleus/nucleoplasm/nucleolus/cytoplasm/centrosome/cytosol/ribonucleoprotein complex/spindle pole centrosome/microtubule organizing center/cytoskeleton	transcription coactivator activity/RNA binding/protein kinase inhibitor activity/protein binding/protein kinase binding/Tat protein binding/histone binding/protein homodimerization activity/ribosomal large subunit binding/ribosomal small subunit binding/protein heterodimerization activity/NF-kappaB binding/unfolded protein binding/nucleic acid binding
TPX2	0.166517	701	1005	2	TPX2	FALSE	TRUE	FALSE	FALSE	TRUE	FALSE	FALSE	FALSE	FALSE	0.124514	0.0321079	0.001114	12.2127	0.00736952	0.0110701	0.0130595	0.0122538	0.0989963	0.000877216	0.427816	0.275588	0.0804951	0.0946939	0.182868	262	1026	116	1140	1005	734	920	16912379	TPX2	AF287265 / ENST00000300403 / ENST00000340513 / NM_012112	apoptotic process / mitosis / cell proliferation / activation of protein kinase activity / cell division / regulation of mitotic spindle organization / cell cycle	spindle pole/nucleus/nucleolus/cytoplasm/spindle/microtubule/microtubule cytoskeleton/cytoskeleton	protein binding/ATP binding/GTP binding/protein kinase binding
KLHL24	0.165651	674	443	0	KLHL24	FALSE	FALSE	FALSE	FALSE	TRUE	TRUE	FALSE	TRUE	TRUE	0	0.0242979	0.00246575	14.7624	0.0219844	0.00665317	0.0187967	0.0170384	0.257473	0.000216439	0.032143	0.605075	0.0177305	0.0211967	0.185168	263	1279	59	443	1292	315	401	16948572	KLHL24	AK000066 / AK098662 / AY422472 / BC142993 / BX648812 / DQ925701 / ENST00000242810 / ENST00000437402 / ENST00000454495 / ENST00000454652 / ENST00000461813 / ENST00000468001 / ENST00000468101 / ENST00000473045 / ENST00000475827 / ENST00000476808 / ENST00000481126 / ENST00000492409 / GENSCAN00000010268 / NM_017644 / OTTHUMT00000346584 / OTTHUMT00000346585 / OTTHUMT00000346586 / OTTHUMT00000346587 / …	NA	cytoplasm/axon/perikaryon/cell projection	protein binding
RASA4	0.16563	398	187	0	RASA4	FALSE	TRUE	TRUE	FALSE	FALSE	TRUE	FALSE	TRUE	TRUE	0	0.0631677	0.0105502	4.03663	0.0290612	0.0164091	0.0227396	0.0222113	0.00231447	0.197567	0.0109111	0.0986384	0.0066567	0.00455949	0.185226	264	120	709	187	750	159	134	17061106	OTTHUMG00000180800 / RASA4 / RASA4B / RASA4CP / RP11-514P8.6 / UPK3BL	AK025420 / AK296589 / AK300412 / AK315928 / BC110873 / BC113663 / BC143584 / BC143585 / ENST00000262940 / ENST00000306682 / ENST00000424092 / ENST00000461209 / ENST00000462172 / ENST00000465829 / ENST00000481893 / ENST00000495352 / ENST00000519541 / ENST00000521822 / ENST00000522223 / ENST00000541884 / ENST00000545716 / GENSCAN00000009581 / GENSCAN00000009606 / GENSCAN00000025401 / n345900 / n406…	positive regulation of Ras GTPase activity / intracellular signal transduction / negative regulation of Ras protein signal transduction / signal transduction / regulation of small GTPase mediated signal transduction / positive regulation of GTPase activity	cytoplasm/cytosol/intrinsic to internal side of plasma membrane/intracellular/plasma membrane/membrane	GTPase activator activity/Ras GTPase activator activity/phospholipid binding/metal ion binding/protein binding
SNORD56B	0.165471	553	140	0	SNORD56B	FALSE	TRUE	TRUE	FALSE	FALSE	TRUE	TRUE	TRUE	TRUE	0	0.0621666	0.0201891	1.66749	0.0317306	0.0284175	0.025721	0.0266712	0.00259243	0.833807	0.00746764	0.0112315	0.00328672	0.00131993	0.18565	265	129	1392	140	185	89	47	16786058	SNORD56B	NR_001276	NA	NA	NA
SEMA3B	0.16545	651	657	2	SEMA3B	FALSE	FALSE	FALSE	FALSE	TRUE	TRUE	FALSE	FALSE	TRUE	0.124514	0.029789	0.00755142	9.98162	0.020264	0.0191523	0.0133856	0.0149199	0.13217	0.00332661	0.0425605	0.0586331	0.0737054	0.0408816	0.185706	266	1114	196	554	657	717	646	16941024	SEMA3B	AB083186 / AB209322 / AK092182 / AK098329 / AK293678 / AK308875 / BC009113 / BC013975 / BC024220 / ENST00000316347 / ENST00000414456 / ENST00000416295 / ENST00000418576 / ENST00000418948 / ENST00000419007 / ENST00000419213 / ENST00000426144 / ENST00000433753 / ENST00000434030 / ENST00000439487 / ENST00000441915 / ENST00000454314 / ENST00000454939 / ENST00000456210 / ENST00000456560 / ENST00000575…	cell-cell signaling / axon guidance / multicellular organismal development	extracellular region/endoplasmic reticulum/membrane	receptor activity/protein binding
ACSL1	0.164365	722	805	4	ACSL1	FALSE	FALSE	FALSE	FALSE	TRUE	FALSE	FALSE	TRUE	TRUE	0.18241	0.0236601	0.00567785	9.5826	0.00990061	0.0153493	0.0229651	0.0206071	0.277447	0.00427234	0.268199	0.120909	0.00630417	0.00726128	0.18864	267	1295	217	1004	805	153	187	16982047	ACSL1	AK292798 / AK296550 / AK296826 / AK303486 / BC033479 / BC050073 / D10040 / ENST00000281455 / ENST00000437665 / ENST00000454703 / ENST00000503407 / ENST00000504342 / ENST00000504900 / ENST00000505492 / ENST00000506733 / ENST00000507295 / ENST00000513001 / ENST00000513317 / ENST00000515030 / GENSCAN00000017258 / L09229 / NM_001995 / OTTHUMT00000361098 / OTTHUMT00000361099 / OTTHUMT00000361100 / OTT…	long-chain fatty acid metabolic process / response to nutrient / lipid biosynthetic process / response to organic cyclic compound / triglyceride biosynthetic process / adiponectin-mediated signaling pathway / unsaturated fatty acid metabolic process / response to oleic acid / long-chain fatty-acyl-CoA biosynthetic process / alpha-linolenic acid metabolic process / xenobiotic catabolic process / r…	mitochondrion/mitochondrial outer membrane/peroxisomal membrane/endoplasmic reticulum membrane/plasma membrane/integral to membrane/peroxisome/endoplasmic reticulum/membrane/organelle membrane/intracellular membrane-bounded organelle	long-chain fatty acid-CoA ligase activity/ATP binding/nucleotide binding/catalytic activity/ligase activity
CCNL1	0.163748	437	313	0	CCNL1	FALSE	TRUE	TRUE	FALSE	TRUE	TRUE	FALSE	FALSE	FALSE	0	0.0636762	0.00538397	7.8236	0.0341589	0.00476674	0.0068314	0.00876459	0.0021854	0.0134717	0.00535334	0.788801	0.419731	0.279204	0.190327	268	114	313	115	1408	1131	1234	16960807	CCNL1	AF180920 / AF208843 / AF367476 / AK098021 / AK122738 / AK125606 / AY358663 / BC007081 / BC038394 / BC067812 / BX641146 / BX647554 / ENST00000295925 / ENST00000295926 / ENST00000461804 / ENST00000464316 / ENST00000464679 / ENST00000465947 / ENST00000467849 / ENST00000468977 / ENST00000470121 / ENST00000471044 / ENST00000471247 / ENST00000474539 / ENST00000475298 / ENST00000476367 / ENST00000476744…	regulation of cyclin-dependent protein serine/threonine kinase activity / transcription, DNA-dependent / regulation of transcription, DNA-dependent / RNA processing	nucleus/nuclear speck	protein kinase binding/protein binding
TXNIP	0.163613	716	736	3	TXNIP	FALSE	FALSE	FALSE	FALSE	TRUE	TRUE	FALSE	FALSE	FALSE	0.157119	0.0215744	0.00373774	11.1358	0.0260228	0.0168068	0.00934281	0.0119768	0.352044	0.00164673	0.0171091	0.0914111	0.21988	0.103346	0.190699	269	1352	148	262	736	944	943	16669796	LOC101060503 / TXNIP	AK301148 / AK301203 / AK304670 / BC093702 / BC093704 / ENST00000369317 / ENST00000425134 / ENST00000475171 / ENST00000488537 / ENST00000582401 / GENSCAN00000014488 / GENSCAN00000052402 / NM_006472 / OTTHUMT00000038547 / OTTHUMT00000038548 / OTTHUMT00000100458 / OTTHUMT00000319377 / S73591 / uc001enn.4 / uc010oys.2	negative regulation of transcription from RNA polymerase II promoter / transcription, DNA-dependent / protein import into nucleus / cell cycle / response to mechanical stimulus / response to glucose stimulus / keratinocyte differentiation / response to estradiol stimulus / response to progesterone stimulus / nucleotide-binding domain, leucine rich repeat containing receptor signaling pathway / re…	nucleus/cytoplasm/mitochondrial intermembrane space/cytosol	enzyme inhibitor activity/protein binding/ubiquitin protein ligase binding
NCL	0.163237	818	811	31	NCL	FALSE	TRUE	FALSE	FALSE	TRUE	FALSE	FALSE	FALSE	FALSE	0.392798	0.0358309	0.00955509	6.15246	0.0177688	0.00459397	0.00355954	0.00491605	0.0620619	0.0429201	0.0648111	0.805064	0.817514	0.74614	0.191737	270	811	483	669	1416	1397	1462	16909491	LOC100996253 / NCL	AK000250 / AK127608 / AK128584 / BC002343 / BC006494 / BC006516 / ENST00000322723 / ENST00000356936 / ENST00000417652 / ENST00000454824 / ENST00000461347 / ENST00000466274 / ENST00000494618 / GENSCAN00000041293 / NM_005381 / OTTHUMT00000332731 / OTTHUMT00000332732 / OTTHUMT00000332733 / OTTHUMT00000332734 / OTTHUMT00000332735 / OTTHUMT00000332736 / OTTHUMT00000332737 / OTTHUMT00000332738 / OTTHUM…	angiogenesis	nucleus/nucleoplasm/nucleolus/cell cortex/ribonucleoprotein complex/cytoplasm	nucleotide binding/RNA binding/protein binding/protein C-terminus binding/telomeric DNA binding/nucleic acid binding/DNA binding/identical protein binding/binding
SNORD12C	0.162726	489	659	0	SNORD12C	FALSE	TRUE	TRUE	FALSE	FALSE	TRUE	FALSE	FALSE	TRUE	0	0.0693451	0.0123892	3.40328	0.0398838	0.0127762	0.0145201	0.0163431	0.00116442	0.308867	0.00254527	0.198697	0.0543242	0.0262571	0.193159	271	88	825	69	932	659	470	16914741	SNORD12C	NR_002433	NA	NA	NA
MBOAT2	0.162679	399	278	0	MBOAT2	FALSE	TRUE	TRUE	FALSE	TRUE	FALSE	TRUE	TRUE	TRUE	0	0.0416894	0.00918499	8.47897	0.0121926	0.0307292	0.0193851	0.0206764	0.0298277	0.00870552	0.175304	0.00764053	0.0152675	0.0071152	0.193291	272	499	273	863	133	278	185	16894283	MBOAT2	AB305044 / AK295907 / AK315881 / BC016005 / BC146871 / BC157827 / ENST00000305997 / ENST00000460786 / ENST00000462696 / ENST00000471753 / ENST00000473432 / ENST00000474341 / ENST00000477073 / ENST00000486315 / ENST00000486484 / ENST00000494760 / GENSCAN00000006167 / NM_138799 / OTTHUMT00000206735 / OTTHUMT00000353387 / OTTHUMT00000353388 / OTTHUMT00000353389 / OTTHUMT00000353390 / OTTHUMT00000353…	phospholipid metabolic process / phosphatidylcholine acyl-chain remodeling / phosphatidylethanolamine acyl-chain remodeling / small molecule metabolic process / glycerophospholipid biosynthetic process / lipid metabolic process / phospholipid biosynthetic process	endoplasmic reticulum membrane/integral to membrane/membrane	1-acylglycerol-3-phosphate O-acyltransferase activity/transferase activity/transferase activity, transferring acyl groups/transferase activity, transferring acyl groups other than amino-acyl groups
MTFP1	0.162245	548	650	1	MTFP1	FALSE	TRUE	TRUE	FALSE	TRUE	FALSE	FALSE	FALSE	FALSE	0.0785596	0.0411493	0.00587009	11.0812	0.00881791	0.0194403	0.00597414	0.00845549	0.0319006	0.00170124	0.327973	0.0555555	0.51396	0.305921	0.194507	273	523	149	1063	650	1203	1262	16928967	MTFP1	BC009300 / ENST00000266263 / ENST00000355143 / ENST00000412752 / ENST00000454552 / ENST00000489658 / NM_001003704 / NM_016498	mitochondrial fission / apoptotic process	mitochondrial inner membrane/integral to membrane/mitochondrion/membrane	NA
GPR3	0.161914	750	1060	4	GPR3	FALSE	FALSE	FALSE	FALSE	TRUE	FALSE	FALSE	TRUE	FALSE	0.18241	0.0285687	0.00469234	10.775	0.00656396	0.00992758	0.0160826	0.0142635	0.153693	0.00204495	0.494089	0.34173	0.0358616	0.0502288	0.195438	274	1160	165	1194	1060	525	737	16661429	GPR3	BC032702 / ENST00000374024 / NM_005281	adenylate cyclase-activating G-protein coupled receptor signaling pathway / regulation of meiosis / signal transduction / G-protein coupled receptor signaling pathway	integral to plasma membrane/plasma membrane/membrane/integral to membrane	G-protein coupled receptor activity/signal transducer activity
SDR16C5	0.161757	534	512	0	SDR16C5	FALSE	FALSE	FALSE	FALSE	TRUE	FALSE	TRUE	TRUE	TRUE	0	0.0344479	0.00907371	11.3705	0.0120983	0.021313	0.0185292	0.0184572	0.07383	0.00143247	0.178378	0.0392746	0.0189852	0.0137656	0.195883	275	893	139	870	512	329	294	17077341	SDR16C5	AK095159 / ENST00000303749 / ENST00000396721 / NM_138969	retinol metabolic process / retinal metabolic process / keratinocyte proliferation / detection of light stimulus involved in visual perception / metabolic process / oxidation-reduction process	endoplasmic reticulum membrane/integral to membrane/endoplasmic reticulum/membrane	retinol dehydrogenase activity/oxidoreductase activity/nucleotide binding
OTTHUMG00000170592	0.161745	445	358	0	OTTHUMG00000170592	FALSE	TRUE	TRUE	FALSE	TRUE	FALSE	FALSE	TRUE	TRUE	0	0.0454808	0.00930045	7.91889	0.0122113	0.00872839	0.0348201	0.0285874	0.0186712	0.0126348	0.174699	0.425558	0.000452858	0.000793463	0.195915	276	358	305	861	1143	16	32	16791815	OTTHUMG00000170592 / RP11-320M16.2	ENST00000556520 / OTTHUMT00000409759	NA	NA	NA
HIST2H4B	0.161342	672	858	0	HIST2H4B	FALSE	FALSE	FALSE	FALSE	TRUE	FALSE	FALSE	TRUE	TRUE	0	0.0274848	0.00388099	14.268	0.0106974	0.0143518	0.0164493	0.0156204	0.175553	0.000281259	0.23124	0.146565	0.0325626	0.032854	0.197059	277	1182	69	947	858	493	554	17016406	HIST1H4A / HIST1H4B / HIST1H4C / HIST1H4D / HIST1H4E / HIST1H4F / HIST1H4H / HIST1H4I / HIST1H4J / HIST1H4K / HIST1H4L / HIST2H4A / HIST2H4B / HIST4H4	BC010926 / ENST00000289352 / ENST00000377727 / NM_003543	telomere maintenance / chromatin organization / nucleosome assembly / CENP-A containing nucleosome assembly at centromere / negative regulation of megakaryocyte differentiation / phosphatidylinositol-mediated signaling / DNA-dependent transcription, initiation	nucleosome/extracellular region/nucleus/nucleoplasm/nucleolus/actin cytoskeleton/chromosome	DNA binding/protein binding/protein heterodimerization activity
ARAP2	0.161271	585	689	1	ARAP2	FALSE	FALSE	FALSE	FALSE	TRUE	TRUE	FALSE	FALSE	TRUE	0.0785596	0.0332164	0.00213473	9.86541	0.0250995	0.0178948	0.0124592	0.0144185	0.0861646	0.0035767	0.0196954	0.0743165	0.0947053	0.0478417	0.197263	278	969	203	301	689	762	716	16975084	ARAP2	AY049733 / ENST00000303965 / ENST00000503225 / ENST00000506189 / ENST00000508066 / ENST00000512804 / ENST00000513032 / NM_015230	small GTPase mediated signal transduction / regulation of ARF GTPase activity / regulation of small GTPase mediated signal transduction / signal transduction / positive regulation of GTPase activity	cytosol/intracellular/cytoplasm	phosphatidylinositol-3,4,5-trisphosphate binding/ARF GTPase activator activity/zinc ion binding/GTPase activator activity/phospholipid binding/metal ion binding/protein binding
PDCD4	0.160886	736	804	14	PDCD4	FALSE	TRUE	FALSE	FALSE	FALSE	FALSE	FALSE	TRUE	TRUE	0.306924	0.0374818	0.00993516	3.49916	0.00923919	0.013319	0.0245098	0.0213722	0.0504505	0.289022	0.303312	0.178932	0.00436235	0.00580861	0.198362	279	718	804	1036	907	112	157	16709201	MIR4680 / PDCD4	AK296753 / BC026104 / BC031049 / BX537500 / BX641168 / ENST00000280154 / ENST00000393104 / ENST00000444997 / ENST00000462577 / ENST00000467574 / ENST00000481353 / ENST00000483595 / ENST00000483670 / ENST00000489049 / ENST00000492932 / ENST00000498367 / ENST00000580906 / GENSCAN00000002786 / hsa-mir-4680 / n411365 / NM_001199492 / NM_014456 / NM_145341 / NR_039828 / OTTHUMT00000050361 / OTTHUMT000…	apoptotic process / cell aging / RNA metabolic process / negative regulation of JUN kinase activity / negative regulation of cell cycle / negative regulation of transcription, DNA-dependent	nucleus/nucleolus/cytoplasm/cytosol	RNA binding/protein binding/binding
WFDC10B	0.160796	585	246	0	WFDC10B	FALSE	FALSE	FALSE	FALSE	TRUE	FALSE	TRUE	TRUE	TRUE	0	0.0283766	0.0118974	9.07983	0.0117703	0.0335025	0.0278129	0.0274243	0.157371	0.00588729	0.189514	0.00487914	0.00203826	0.00107888	0.198622	280	1165	246	886	90	59	39	16919638	WFDC10B	AF454506 / ENST00000330523 / ENST00000335769 / NM_172006 / NM_172131	negative regulation of peptidase activity	extracellular region	peptidase inhibitor activity
CREB5	0.160762	477	431	0	CREB5	FALSE	TRUE	TRUE	FALSE	TRUE	TRUE	FALSE	FALSE	FALSE	0	0.0667648	0.00279729	6.54164	0.0413016	0.00810746	0.0021844	0.00643134	0.00154727	0.0325912	0.00213465	0.474948	0.949658	0.533486	0.198718	281	94	431	63	1191	1463	1417	17044602	CREB5 / LOC401317	AK292916 / AK298121 / AK300455 / AK316187 / BC059400 / BC087859 / ENST00000357727 / ENST00000396298 / ENST00000396299 / ENST00000396300 / ENST00000409603 / ENST00000424599 / ENST00000426500 / ENST00000461921 / ENST00000468391 / ENST00000469531 / ENST00000478078 / ENST00000482692 / ENST00000484383 / GENSCAN00000027793 / L05515 / L05911 / L05912 / L05913 / NM_001011666 / NM_004904 / NM_182898 / NM_…	transcription from RNA polymerase II promoter / fat cell differentiation / positive regulation of transcription, DNA-dependent / adipose tissue development / transcription, DNA-dependent / regulation of transcription, DNA-dependent / positive regulation of transcription from RNA polymerase II promoter	nucleus/intracellular	RNA polymerase II core promoter proximal region sequence-specific DNA binding transcription factor activity involved in positive regulation of transcription/sequence-specific DNA binding transcription factor activity/protein binding/zinc ion binding/sequence-specific DNA binding/nucleic acid binding/DNA binding/metal ion binding
POLA2	0.160357	739	662	0	POLA2	FALSE	FALSE	FALSE	FALSE	TRUE	FALSE	FALSE	TRUE	TRUE	0	0.0171731	0.00163631	16.2108	0.0179701	0.00665978	0.0184293	0.0164294	0.556044	0.000102888	0.0626125	0.604446	0.0194773	0.0255661	0.199884	282	1419	37	662	1290	335	459	16726790	POLA2	BC002990 / ENST00000265465 / ENST00000527618 / ENST00000527850 / ENST00000532469 / ENST00000533192 / ENST00000534785 / ENST00000541089 / NM_002689	protein import into nucleus, translocation / G1/S transition of mitotic cell cycle / mitotic cell cycle / telomere maintenance via recombination / telomere maintenance / DNA replication / DNA replication initiation / DNA strand elongation involved in DNA replication / telomere maintenance via semi-conservative replication / S phase of mitotic cell cycle / M/G1 transition of mitotic cell cycle	nucleus/nucleoplasm/alpha DNA polymerase:primase complex/nucleolus/cytoplasm	DNA binding/DNA-directed DNA polymerase activity/protein heterodimerization activity/protein binding/molecular_function
SMYD3-IT1	0.158323	732	751	0	SMYD3 IT1	FALSE	TRUE	TRUE	FALSE	FALSE	TRUE	FALSE	FALSE	FALSE	0	0.0876955	0.0100871	1.44859	0.0200299	0.0150074	0.012689	0.0136872	0.000171409	0.895979	0.0442439	0.129144	0.0889861	0.0602221	0.205848	283	42	1441	574	816	751	795	16701398	SMYD3-IT1	ENST00000426929 / OTTHUMT00000097498	NA	NA	NA
OTTHUMG00000165902	0.158295	615	651	0	OTTHUMG00000165902	FALSE	TRUE	TRUE	FALSE	FALSE	FALSE	TRUE	FALSE	TRUE	0	0.0773064	0.00804088	2.11857	0.0174193	0.0243662	0.0146541	0.0165032	0.000495989	0.683153	0.0688324	0.0226454	0.0524114	0.0249909	0.205931	284	65	1227	673	339	651	449	16722212	OTTHUMG00000165902 / RP11-47J17.1	ENST00000528792 / OTTHUMT00000386995	NA	NA	NA
IFNGR2	0.158105	696	978	3	IFNGR2	FALSE	FALSE	FALSE	FALSE	TRUE	TRUE	FALSE	FALSE	FALSE	0.157119	0.0320936	0.00773923	10.1387	0.0194719	0.0116334	0.00833237	0.00981084	0.0991742	0.00301755	0.0485552	0.24751	0.287085	0.20337	0.206499	285	1027	189	617	978	1018	1127	16922275	IFNGR2	AK292246 / BC003624 / ENST00000290219 / ENST00000381995 / ENST00000405436 / ENST00000421802 / ENST00000439213 / ENST00000545369 / ENST00000571550 / ENST00000572016 / ENST00000572399 / ENST00000573079 / ENST00000573887 / ENST00000575304 / ENST00000576463 / GENSCAN00000004131 / GENSCAN00000051635 / NM_005534 / OTTHUMT00000139916 / OTTHUMT00000139917 / OTTHUMT00000139918 / OTTHUMT00000139919 / OTTHU…	cell surface receptor signaling pathway / response to virus / cytokine-mediated signaling pathway / interferon-gamma-mediated signaling pathway / regulation of interferon-gamma-mediated signaling pathway	endoplasmic reticulum/plasma membrane/integral to plasma membrane/membrane/integral to membrane	interferon-gamma receptor activity/protein binding
SIRT1	0.157615	845	1021	21	SIRT1	FALSE	TRUE	TRUE	FALSE	FALSE	FALSE	TRUE	FALSE	FALSE	0.350331	0.0440874	0.00485333	1.90878	0.00538219	0.0294615	0.00828407	0.0115718	0.0221637	0.755266	0.604775	0.00942546	0.290718	0.117421	0.207966	286	398	1315	1286	158	1021	978	16705313	SIRT1	AF235040 / ENST00000212015 / ENST00000432464 / ENST00000473922 / ENST00000497639 / NM_001142498 / NM_012238	single strand break repair / negative regulation of transcription from RNA polymerase II promoter / chromatin silencing at rDNA / pyrimidine dimer repair by nucleotide-excision repair / DNA synthesis involved in DNA repair / angiogenesis / ovulation from ovarian follicle / cellular glucose homeostasis / positive regulation of protein phosphorylation / positive regulation of adaptive immune respon…	nuclear chromatin/nucleus/nuclear envelope/nuclear inner membrane/nucleoplasm/chromatin silencing complex/nuclear euchromatin/nuclear heterochromatin/nucleolus/cytoplasm/PML body/rDNA heterochromatin/ESC/E(Z) complex/chromatin	p53 binding/transcription corepressor activity/NAD+ ADP-ribosyltransferase activity/histone deacetylase activity/protein binding/protein C-terminus binding/NAD-dependent histone deacetylase activity/deacetylase activity/protein deacetylase activity/NAD-dependent protein deacetylase activity/histone binding/identical protein binding/HLH domain binding/bHLH transcription factor binding/metal ion bi…
PTHLH	0.157292	875	852	26	PTHLH	FALSE	FALSE	FALSE	FALSE	TRUE	FALSE	FALSE	TRUE	TRUE	0.373542	0.0209052	0.00403109	6.07116	0.0121151	0.0144729	0.0155053	0.0150507	0.37908	0.0454773	0.177824	0.143178	0.0417778	0.039243	0.20894	287	1361	499	866	852	577	629	16762661	PTHLH	ENST00000201015 / ENST00000354417 / ENST00000395868 / ENST00000395872 / ENST00000535992 / ENST00000538310 / ENST00000539239 / ENST00000542963 / ENST00000545234 / J03580 / NM_002820 / NM_198964 / NM_198965 / NM_198966	skeletal system development / endochondral ossification / osteoblast development / adenylate cyclase-activating G-protein coupled receptor signaling pathway / cell-cell signaling / endoderm development / female pregnancy / positive regulation of cell proliferation / negative regulation of cell proliferation / epidermis development / regulation of gene expression / protein processing / positive re…	extracellular region/extracellular space/nucleus/nucleolus/cytoplasm/Golgi apparatus/intracellular	hormone activity/peptide hormone receptor binding
KIAA0825	0.157279	446	378	0	KIAA0825	FALSE	TRUE	TRUE	FALSE	TRUE	FALSE	TRUE	TRUE	TRUE	0	0.0449913	0.00744865	6.25519	0.00711331	0.0258405	0.0318511	0.0287879	0.0198286	0.0399003	0.448048	0.0174769	0.000841941	0.000752925	0.208978	288	378	473	1156	274	29	30	16998134	KIAA0825	AB020632 / ENST00000312498 / ENST00000329378 / ENST00000427991 / ENST00000504117 / ENST00000513200 / NM_001145678 / NM_173665	NA	NA	NA
STEAP4	0.157228	473	466	0	STEAP4	FALSE	TRUE	TRUE	FALSE	TRUE	FALSE	FALSE	TRUE	TRUE	0	0.0424613	0.00801653	9.37185	0.0137244	0.0059028	0.0293236	0.0241202	0.0271019	0.00488333	0.132465	0.677908	0.00145587	0.00265643	0.209131	289	466	227	798	1338	45	85	17059567	STEAP4	AF423422 / ENST00000301959 / ENST00000380079 / NM_001205315 / NM_001205316 / NM_024636	ion transport / fat cell differentiation / iron ion homeostasis / transport / oxidation-reduction process / pentose-phosphate shunt	Golgi membrane/plasma membrane/integral to membrane/Golgi apparatus/membrane	oxidoreductase activity/metal ion binding/nucleotide binding/phosphogluconate dehydrogenase (decarboxylating) activity
GGT1	0.156793	572	695	3	GGT1	FALSE	TRUE	TRUE	FALSE	FALSE	FALSE	FALSE	TRUE	TRUE	0.157119	0.0549509	0.0068242	2.88002	0.0167548	0.0159332	0.0202497	0.019239	0.00597327	0.438229	0.0772421	0.108065	0.0122817	0.0108862	0.210452	290	185	960	695	776	239	253	16928293	GGT1 / GGT2	BC035341 / ENST00000248923 / ENST00000400382 / ENST00000400383 / ENST00000412658 / ENST00000412898 / ENST00000419133 / ENST00000430289 / ENST00000456869 / NM_001032364 / NM_001032365 / NM_005265 / NM_013430 / OTTHUMT00000250797 / OTTHUMT00000319108 / OTTHUMT00000319196 / OTTHUMT00000319199 / OTTHUMT00000319200 / OTTHUMT00000319323 / TCONS_l2_00013789-XLOC_l2_007427 / TCONS_l2_00013790-XLOC_l2_007…	regulation of immune system process / cellular amino acid metabolic process / leukotriene metabolic process / glutathione metabolic process / glutathione biosynthetic process / xenobiotic metabolic process / spermatogenesis / cysteine biosynthetic process / arachidonic acid metabolic process / leukotriene biosynthetic process / small molecule metabolic process / regulation of inflammatory respons…	plasma membrane/membrane/integral to membrane/anchored to external side of plasma membrane/cellular_component	gamma-glutamyltransferase activity/protein binding/glutathione hydrolase activity/transferase activity/transferase activity, transferring acyl groups/hydrolase activity
GPR110	0.156036	663	660	1	GPR110	FALSE	FALSE	FALSE	FALSE	TRUE	TRUE	FALSE	FALSE	FALSE	0.0785596	0.0272792	0.00100336	11.0767	0.0267994	0.0191223	0.00784909	0.0113072	0.180016	0.00170581	0.0152213	0.0589637	0.325292	0.127618	0.212768	291	1189	150	238	660	1055	1005	17019778	GPR110	AB045123 / AK095348 / AY140952 / BC104214 / BC104215 / BC113634 / BC113636 / CR627234 / ENST00000283297 / ENST00000371243 / ENST00000371253 / ENST00000419892 / ENST00000449332 / ENST00000471487 / ENST00000475745 / ENST00000477771 / ENST00000487323 / ENST00000491283 / ENST00000493249 / GENSCAN00000033882 / NM_025048 / NM_153840 / OTTHUMT00000040810 / OTTHUMT00000040812 / OTTHUMT00000354168 / OTTHU…	G-protein coupled receptor signaling pathway / neuropeptide signaling pathway / cell surface receptor signaling pathway / signal transduction	nucleus/nucleolus/plasma membrane/integral to membrane/cell junction/membrane	G-protein coupled receptor activity/transmembrane signaling receptor activity/signal transducer activity
DNER	0.155796	857	807	15	DNER	FALSE	FALSE	FALSE	FALSE	FALSE	FALSE	TRUE	TRUE	TRUE	0.314238	0.0313234	0.00841212	2.50498	0.0135104	0.0276952	0.0195033	0.0203692	0.109194	0.552389	0.137716	0.012696	0.0148176	0.00778674	0.213507	292	1060	1087	807	203	266	195	16909319	DNER	AY358891 / ENST00000341772 / ENST00000482831 / NM_139072	neuron migration / endocytosis / Notch signaling pathway / Notch receptor processing / synapse assembly / central nervous system development / glial cell differentiation / skeletal muscle fiber development	early endosome/plasma membrane/integral to membrane/dendrite/neuronal cell body/membrane	transmembrane signaling receptor activity/Notch binding/calcium ion binding/protein binding/clathrin binding
HLA-C	0.155617	743	829	6	HLA C	FALSE	TRUE	FALSE	FALSE	TRUE	FALSE	TRUE	FALSE	FALSE	0.220545	0.031308	0.00747366	8.15273	0.00140004	0.0239464	0.0112445	0.0125411	0.109403	0.010805	0.970002	0.024399	0.13168	0.0864782	0.214059	293	1061	284	1460	364	829	903	17017126	HLA-B / HLA-C	AF016641 / AF026218 / AF168611 / AF170577 / AF196489 / AF405691 / AF418978 / AF428252 / AK026595 / AK124160 / AK301283 / AK304527 / AY007140 / AY732487 / BC002463 / BC008457 / BC010542 / BC013187 / BC033293 / BC041078 / D12471 / D25275 / D31817 / D38526 / D49552 / D49819 / D50292 / D50293 / D50294 / D50296 / D50299 / D50852 / D50853 / D50854 / D64145 / D83031 / D83043 / D85761 / D85762 / ENST0000…	antigen processing and presentation of peptide antigen via MHC class I / antigen processing and presentation of exogenous peptide antigen via MHC class I, TAP-dependent / antigen processing and presentation of exogenous peptide antigen via MHC class I, TAP-independent / immune response / virus-host interaction / cytokine-mediated signaling pathway / antigen processing and presentation of exogenou…	Golgi membrane/extracellular region/plasma membrane/integral to plasma membrane/ER to Golgi transport vesicle membrane/phagocytic vesicle membrane/early endosome membrane/MHC class I protein complex/integral to lumenal side of endoplasmic reticulum membrane/membrane/integral to membrane/axonemal dynein complex	peptide antigen binding/receptor binding/microtubule motor activity/MHC class II receptor activity/protein binding/peptide antigen b [WARNING: THIS FIELD TRUNCATED]
SKA3	0.155174	619	761	0	SKA3	FALSE	TRUE	FALSE	FALSE	TRUE	FALSE	FALSE	FALSE	FALSE	0	0.0366329	0.002838	13.4884	0.00580818	0.00886491	0.0147092	0.0129934	0.0561188	0.000428924	0.563175	0.415245	0.051644	0.074963	0.215434	294	761	84	1258	1133	647	865	16777278	SKA3	AF361358 / ENST00000298260 / ENST00000314759 / ENST00000400018 / ENST00000462482 / ENST00000465471 / ENST00000475251 / ENST00000536239 / NM_001166017 / NM_145061	chromosome segregation / mitosis / regulation of microtubule polymerization or depolymerization / cell division / cell cycle	condensed chromosome outer kinetochore/cytoplasm/spindle microtubule/chromosome, centromeric region/kinetochore/condensed chromosome kinetochore/chromosome/spindle/cytoskeleton/microtubule	protein binding
H2AFX	0.155168	897	1113	22	H2AFX	FALSE	FALSE	FALSE	FALSE	TRUE	FALSE	FALSE	TRUE	FALSE	0.355369	0.021459	0.0127385	7.94189	0.0036932	0.00921947	0.0150925	0.0131637	0.356596	0.0124412	0.780343	0.389386	0.0466227	0.071037	0.215453	295	1354	302	1376	1113	616	850	16745236	H2AFX	BC011694 / ENST00000375167 / ENST00000530167 / NM_002105	DNA damage checkpoint / double-strand break repair via homologous recombination / DNA repair / double-strand break repair / nucleosome assembly / response to DNA damage stimulus / meiosis / spermatogenesis / response to ionizing radiation / positive regulation of DNA repair / DNA recombination / cell cycle	chromosome, telomeric region/nucleosome/nuclear chromatin/condensed nuclear chromosome/male germ cell nucleus/XY body/nucleus/nucleoplasm/replication fork/chromatin/chromosome/intracellular	DNA binding/damaged DNA binding/protein binding/enzyme binding/histone binding/protein heterodimerization activity/sequence-specific DNA binding
HIST1H4J	0.154848	676	680	0	HIST1H4J	FALSE	FALSE	FALSE	FALSE	TRUE	FALSE	FALSE	TRUE	TRUE	0	0.0222435	0.00517711	13.4568	0.011804	0.0181776	0.0197212	0.0188042	0.326528	0.000436422	0.188336	0.0704418	0.0140249	0.0124006	0.216451	296	1333	85	884	680	263	275	17016494	HIST1H4A / HIST1H4B / HIST1H4C / HIST1H4D / HIST1H4E / HIST1H4F / HIST1H4H / HIST1H4I / HIST1H4J / HIST1H4K / HIST1H4L / HIST2H4A / HIST2H4B / HIST4H4	AK312028 / BC148271 / ENST00000355057 / ENST00000357549 / NM_003541 / NM_021968	telomere maintenance / chromatin organization / nucleosome assembly / CENP-A containing nucleosome assembly at centromere / negative regulation of megakaryocyte differentiation / phosphatidylinositol-mediated signaling / DNA-dependent transcription, initiation	nucleosome/extracellular region/nucleus/nucleoplasm/chromosome/nucleolus/actin cytoskeleton	DNA binding/protein binding/protein heterodimerization activity
KITLG	0.154764	437	478	0	KITLG	FALSE	TRUE	TRUE	FALSE	FALSE	FALSE	TRUE	TRUE	TRUE	0	0.0441681	0.00825812	5.72906	0.01929	0.0397003	0.0165615	0.0206453	0.0219444	0.0580904	0.0500587	0.00188364	0.0316177	0.00718034	0.216717	297	393	538	632	34	478	186	16768270	KITLG	AF400436 / ENST00000228280 / ENST00000347404 / ENST00000357116 / ENST00000552044 / NM_000899 / NM_003994	neural crest cell migration / positive regulation of myeloid leukocyte differentiation / cell adhesion / signal transduction / epidermal growth factor receptor signaling pathway / cell proliferation / fibroblast growth factor receptor signaling pathway / male gonad development / hemopoiesis / negative regulation of mast cell apoptotic process / embryonic hemopoiesis / germ cell programmed cell de…	extracellular region/extracellular space/cytoplasm/cytoskeleton/plasma membrane/integral to membrane/membrane	cytokine activity/stem cell factor receptor binding/protein binding/growth factor activity
PTGES	0.15399	757	648	1	PTGES	FALSE	FALSE	FALSE	FALSE	TRUE	FALSE	FALSE	TRUE	TRUE	0.0785596	0.0218984	0.00622198	12.7152	0.00532077	0.0195247	0.01599	0.01569	0.339497	0.000659251	0.610911	0.0546865	0.0367483	0.03215	0.219155	298	1343	105	1292	648	530	545	17099076	PTGES	BC008280 / ENST00000340607 / ENST00000481476 / NM_004878	prostaglandin biosynthetic process / acute inflammatory response / chronic inflammatory response / prostaglandin metabolic process / signal transduction / negative regulation of cell proliferation / response to organic cyclic compound / arachidonic acid metabolic process / cyclooxygenase pathway / response to lipopolysaccharide / response to retinoic acid / response to cytokine stimulus / small m…	nuclear envelope lumen/endoplasmic reticulum membrane/membrane/integral to membrane/perinuclear region of cytoplasm/cytoplasm/intracellular membrane-bounded organelle	glutathione binding/prostaglandin-E synthase activity/isomerase activity
LIMA1	0.153842	536	623	1	LIMA1	FALSE	TRUE	TRUE	FALSE	FALSE	TRUE	FALSE	FALSE	FALSE	0.0785596	0.0641314	0.00679885	4.69391	0.0355727	0.00830635	0.00436627	0.00762348	0.00207624	0.122855	0.0044323	0.45869	0.716365	0.388477	0.219625	299	111	623	99	1182	1341	1326	16764564	LIMA1	AF157325 / AF198454 / AF198455 / AK096172 / AK297766 / BC110815 / BC136763 / ENST00000341247 / ENST00000394943 / ENST00000547825 / ENST00000550592 / ENST00000551486 / ENST00000552008 / ENST00000552045 / ENST00000552491 / ENST00000552720 / ENST00000552783 / ENST00000552823 / ENST00000552909 / GENSCAN00000012755 / NM_001113546 / NM_001113547 / NM_001243775 / NM_016357 / OTTHUMT00000406234 / OTTHUMT…	negative regulation of actin filament depolymerization / ruffle organization / actin filament bundle assembly	stress fiber/cytoplasm/plasma membrane/focal adhesion/actin cytoskeleton/cytoskeleton/cell junction	actin monomer binding/zinc ion binding/actin filament binding/actin binding/protein binding/metal ion binding
TEX15	0.153376	450	387	1	TEX15	FALSE	TRUE	TRUE	FALSE	TRUE	TRUE	TRUE	FALSE	FALSE	0.0785596	0.0444308	0.00223208	6.55564	0.0251894	0.0249609	0.00868785	0.0127752	0.0212449	0.032272	0.0194254	0.0203873	0.261564	0.080314	0.221108	300	387	428	296	317	989	883	17076103	TEX15	BC141841 / ENST00000256246 / ENST00000518257 / ENST00000523186 / NM_031271	synaptonemal complex assembly / male meiosis / spermatogenesis / fertilization / regulation of double-strand break repair via homologous recombination / male genitalia development / regulation of protein localization / protein localization to chromosome / homeostasis of number of cells within a tissue / synapsis	NA	NA
FLJ25917	0.15326	486	522	0	FLJ25917	FALSE	TRUE	TRUE	FALSE	FALSE	TRUE	TRUE	FALSE	FALSE	0	0.0688792	0.008382	3.6277	0.0324162	0.0212035	0.00692985	0.0114327	0.0012254	0.264184	0.00679019	0.0400718	0.409752	0.122679	0.221478	301	89	779	131	522	1118	991	17110372	FLJ25917	AK098783 / ENST00000414772 / ENST00000456532 / TCONS_l2_00030477-XLOC_l2_015716 / TCONS_l2_00030808-XLOC_l2_015716 / TCONS_l2_00030809-XLOC_l2_015716	NA	NA	NA
SNORA72	0.153241	392	475	0	SNORA72	FALSE	TRUE	TRUE	FALSE	FALSE	TRUE	TRUE	TRUE	TRUE	0	0.0541382	0.0131311	5.13066	0.021472	0.0279775	0.0159732	0.0184322	0.00657443	0.0894819	0.0349193	0.0121007	0.0369111	0.0138701	0.22154	302	196	579	475	194	533	298	17079434	SNORA72	NR_002581	NA	NA	NA
MFSD4	0.153075	721	1192	0	MFSD4	FALSE	FALSE	FALSE	FALSE	TRUE	FALSE	FALSE	TRUE	TRUE	0	0.0250324	0.00685801	13.1493	0.00657711	0.00787228	0.0284646	0.0232086	0.236033	0.000517164	0.492946	0.49469	0.00176133	0.00343203	0.222072	303	1254	93	1192	1206	52	102	16676498	MFSD4	AK127321 / AK293816 / AK295148 / AK304109 / AK304120 / AY358107 / BC036549 / ENST00000367147 / ENST00000465651 / ENST00000471425 / ENST00000475956 / ENST00000478555 / ENST00000489709 / ENST00000536357 / ENST00000539267 / GENSCAN00000031356 / NM_181644 / OTTHUMT00000090391 / OTTHUMT00000090392 / OTTHUMT00000090393 / OTTHUMT00000090394 / OTTHUMT00000090607 / OTTHUMT00000090608 / uc001hcv.4 / uc010p…	transmembrane transport / transport	integral to membrane/membrane	NA
FAM72D	0.153008	583	877	0	FAM72D	FALSE	TRUE	TRUE	TRUE	FALSE	TRUE	FALSE	FALSE	FALSE	0	0.071089	0.0513459	2.59632	0.0413818	0.0139374	0.0103891	0.0135632	0.000962955	0.52312	0.00211372	0.158781	0.166005	0.062623	0.222288	304	84	1059	61	877	879	806	16691883	FAM72D	AB096683	NA	NA	NA
JHDM1D	0.15275	398	363	0	JHDM1D	FALSE	TRUE	TRUE	FALSE	TRUE	TRUE	FALSE	TRUE	TRUE	0	0.0541926	0.00557129	7.09258	0.0291971	0.00639247	0.0172792	0.0164579	0.00653228	0.0221926	0.0106987	0.6301	0.0262127	0.0253424	0.223117	305	194	363	181	1309	420	456	17063507	JHDM1D	ENST00000006967 / ENST00000397560 / ENST00000472616 / ENST00000478996 / NM_030647	transcription, DNA-dependent / midbrain development / histone H3-K9 demethylation / histone H4-K20 demethylation / positive regulation of transcription, DNA-dependent / histone H3-K36 demethylation / histone H3-K27 demethylation / regulation of transcription, DNA-dependent / nervous system development / chromatin modification / oxidation-reduction process	nucleus/nucleolus	iron ion binding/zinc ion binding/oxidoreductase activity, acting on single donors with incorporation of molecular oxygen, incorporation of two atoms of oxygen/oxidoreductase activity, acting on paired donors, with incorporation or reduction of molecular oxygen, 2-oxoglutarate as one donor, and incorporation of one atom each of oxygen into both donors/histone demethylase activity (H3-K9 specific)…
PLK2	0.152198	568	608	2	PLK2	FALSE	TRUE	TRUE	FALSE	FALSE	TRUE	FALSE	FALSE	FALSE	0.124514	0.0649871	0.00566494	4.84437	0.0261906	0.0030852	0.00519631	0.00659398	0.0018862	0.110142	0.0166805	0.927148	0.609241	0.512025	0.224904	306	103	608	257	1450	1269	1400	16996433	PLK2	AF059617 / AF223574 / AK297298 / BC013879 / ENST00000274289 / ENST00000502671 / ENST00000503115 / ENST00000503378 / ENST00000503713 / ENST00000504196 / ENST00000510629 / ENST00000514306 / ENST00000515415 / GENSCAN00000042228 / NM_001252226 / NM_006622 / OTTHUMT00000214150 / OTTHUMT00000367845 / OTTHUMT00000367846 / OTTHUMT00000367847 / OTTHUMT00000367849 / OTTHUMT00000367850 / OTTHUMT00000367853 …	G1/S transition of mitotic cell cycle / protein phosphorylation / mitotic spindle organization / mitotic cell cycle checkpoint / Ras protein signal transduction / memory / Rap protein signal transduction / negative regulation of apoptotic process / positive regulation of I-kappaB kinase/NF-kappaB cascade / regulation of centriole replication / regulation of synaptic plasticity / long-term synapti…	intracellular/centrosome/centriole/dendrite/cytoplasm/cytoskeleton/cell projection	protein serine/threonine kinase activity/signal transducer activity/protein binding/ATP binding/protein kinase activity/protein tyrosine kinase activity/transferase activity, transferring phosphorus-containing groups/nucleotide binding/kinase activity/transferase activity
MIR200C	0.151997	509	589	1	MIR200C	FALSE	TRUE	TRUE	FALSE	FALSE	FALSE	TRUE	TRUE	TRUE	0.0785596	0.0515492	0.012219	3.85402	0.0094896	0.0360237	0.015397	0.0183425	0.00894556	0.225108	0.289516	0.00328599	0.0429954	0.0142506	0.225559	307	234	737	1019	59	589	302	16747661	MIR200C	hsa-mir-200c / NR_029779	NA	NA	NA
PDGFA	0.151385	818	1012	14	PDGFA	FALSE	FALSE	FALSE	FALSE	TRUE	TRUE	FALSE	FALSE	FALSE	0.306924	0.0302045	0.00483279	7.37887	0.0201268	0.0108788	0.00232846	0.00523671	0.125525	0.0182245	0.0435384	0.285784	0.939534	0.700773	0.227562	308	1099	341	565	1012	1461	1458	17054243	PDGFA	AK292217 / ENST00000354513 / ENST00000402802 / ENST00000405692 / ENST00000426681 / ENST00000482462 / NM_002607 / NM_033023	angiogenesis / response to hypoxia / cell activation / hair follicle development / positive regulation of mesenchymal cell proliferation / platelet degranulation / epidermal growth factor receptor signaling pathway / transforming growth factor beta receptor signaling pathway / cell-cell signaling / blood coagulation / positive regulation of cell proliferation / fibroblast growth factor receptor s…	Golgi membrane/extracellular region/extracellular space/endoplasmic reticulum lumen/microvillus/cell surface/platelet alpha granule lumen/membrane	platelet-derived growth factor receptor binding/collagen binding/growth factor activity/protein homodimerization activity/protein heterodimerization activity/platelet-derived growth factor binding/cell surface binding/eukaryotic cell surface binding
ITPR1	0.151308	724	885	7	ITPR1	FALSE	FALSE	FALSE	FALSE	TRUE	FALSE	TRUE	FALSE	FALSE	0.235679	0.0333783	0.00536503	6.07286	0.0117744	0.0247956	0.00940994	0.0121713	0.0844332	0.0454224	0.189372	0.0209896	0.215976	0.0971938	0.227817	309	960	498	885	323	937	926	16936947	ITPR1	AK294594 / AK296235 / AK309981 / AK311008 / BC144563 / D26070 / ENST00000302640 / ENST00000354582 / ENST00000357086 / ENST00000423119 / ENST00000443694 / ENST00000456211 / ENST00000463980 / ENST00000467056 / ENST00000467545 / ENST00000472205 / ENST00000477577 / ENST00000481415 / ENST00000487016 / ENST00000490572 / ENST00000493491 / ENST00000494681 / ENST00000544951 / GENSCAN00000040803 / GENSCAN0…	response to hypoxia / energy reserve metabolic process / calcium ion transport / signal transduction / epidermal growth factor receptor signaling pathway / activation of phospholipase C activity / blood coagulation / fibroblast growth factor receptor signaling pathway / platelet activation / Fc-gamma receptor signaling pathway involved in phagocytosis / small molecule metabolic process / innate i…	endoplasmic reticulum/endoplasmic reticulum membrane/integral to membrane/platelet dense granule membrane/platelet dense tubular network/platelet dense tubular network membrane/nuclear envelope/nuclear inner membrane/nucleolus/cytoplasm/calcineurin complex/postsynaptic density/membrane/sarcoplasmic reticulum/protein complex	intracellular ligand-gated calcium channel activity/inositol 1,4,5-trisphosphate-sensitive calcium-release channel activity/protein binding/calcium ion transmembrane transporter activity/phosphatidylinositol binding/ion channel activity/calcium channel activity/phosphatidylinos [WARNING: THIS FIELD TRUNCATED]
PIK3C3	0.15099	794	700	5	PIK3C3	FALSE	FALSE	FALSE	FALSE	TRUE	FALSE	TRUE	FALSE	TRUE	0.203074	0.0219243	0.00278409	9.45091	0.00589488	0.0215694	0.0137044	0.0143644	0.338508	0.00464395	0.55493	0.0374728	0.0676332	0.0486609	0.228864	310	1342	224	1248	496	700	727	16852098	PIK3C3	AK090567 / AK298517 / BC010388 / BC033004 / BC053651 / ENST00000262039 / ENST00000398870 / ENST00000585528 / ENST00000586545 / ENST00000588631 / ENST00000589550 / ENST00000590013 / ENST00000591011 / ENST00000593098 / GENSCAN00000030040 / NM_002647 / OTTHUMT00000255804 / OTTHUMT00000441498 / OTTHUMT00000441499 / OTTHUMT00000441501 / OTTHUMT00000441502 / OTTHUMT00000441503 / OTTHUMT00000441504 / OT…	autophagic vacuole assembly / cytokinesis / toll-like receptor signaling pathway / phospholipid metabolic process / phosphatidylinositol biosynthetic process / endosome organization / insulin receptor signaling pathway / protein processing / toll-like receptor 9 signaling pathway / phosphatidylinositol-3-phosphate biosynthetic process / response to leucine / small molecule metabolic process / ear…	late endosome/cytosol/phosphatidylinositol 3-kinase complex/midbody/endosome	protein kinase activity/protein binding/ATP binding/1-phosphatidylinositol-3-kinase activity/binding/transferase activity, transferring phosphorus-containing groups/phosphotransferase activity, alcohol group as acceptor/phosphatidylinositol 3-kinase activity/nucleotide binding/kinase activity/transferase activity
LRP8	0.150798	711	824	0	LRP8	FALSE	FALSE	FALSE	FALSE	TRUE	FALSE	FALSE	TRUE	TRUE	0	0.0238939	0.00311162	14.2008	0.0130594	0.0123339	0.0156818	0.0149053	0.269977	0.00029155	0.149519	0.216372	0.0398679	0.0410693	0.229501	311	1286	70	824	947	558	650	16687352	LRP8	D50678 / ENST00000306052 / ENST00000347547 / ENST00000354412 / ENST00000371454 / ENST00000459674 / ENST00000460214 / ENST00000480045 / ENST00000481431 / NM_001018054 / NM_004631 / NM_017522 / NM_033300	negative regulation of transcription from RNA polymerase II promoter / retinoid metabolic process / proteolysis / lipid metabolic process / endocytosis / signal transduction / blood coagulation / phototransduction, visible light / cytokine-mediated signaling pathway / ammon gyrus development / layer formation in cerebral cortex / positive regulation of CREB transcription factor activity / reelin-…	extracellular region/plasma membrane/caveola/integral to membrane/membrane	transmembrane signaling receptor activity/calcium ion binding/protein binding/very-low-density lipoprotein particle receptor activity/apolipoprotein binding/reelin receptor activity
SQRDL	0.150391	573	544	0	SQRDL	FALSE	TRUE	FALSE	FALSE	FALSE	FALSE	TRUE	TRUE	TRUE	0	0.0361073	0.00254983	5.68895	0.0103325	0.0291845	0.0367209	0.0332658	0.0599457	0.0597887	0.247484	0.00987219	0.000308255	0.000242146	0.230856	312	793	544	974	164	11	14	16800680	OTTHUMG00000172725 / RP11-96O20.4 / SQRDL	AF118085 / AF151802 / AK222463 / BC014069 / BC016836 / ENST00000260324 / ENST00000561493 / ENST00000561735 / ENST00000564080 / ENST00000565997 / ENST00000566934 / ENST00000568606 / GENSCAN00000008794 / NM_001271213 / NM_021199 / OTTHUMT00000254319 / OTTHUMT00000420267 / OTTHUMT00000420349 / OTTHUMT00000420352 / OTTHUMT00000420354 / OTTHUMT00000420355 / uc001zvu.3 / uc001zvv.3	sulfur amino acid metabolic process / sulfur amino acid catabolic process / cellular nitrogen compound metabolic process / small molecule metabolic process / sulfide oxidation, using sulfide:quinone oxidoreductase / oxidation-reduction process	cytoplasm/mitochondrial inner membrane/mitochondrion	sulfide:quinone oxidoreductase activity/oxidoreductase activity
RN7SK	0.15036	723	1002	0	RN7SK	FALSE	TRUE	TRUE	FALSE	FALSE	FALSE	FALSE	TRUE	TRUE	0	0.0809166	0.013157	1.72893	0.00991644	0.00924958	0.0249278	0.0210639	0.000340686	0.814565	0.26741	0.387252	0.00395409	0.00635351	0.23096	313	59	1372	1002	1112	102	167	17009627	RN7SK	7SK / NR_001445	NA	NA	NA
KLRC3	0.149931	649	1000	0	KLRC3	FALSE	FALSE	FALSE	FALSE	TRUE	FALSE	FALSE	TRUE	TRUE	0	0.0302413	0.00632062	11.8197	0.00994234	0.00969495	0.0250512	0.0212327	0.124951	0.00110075	0.266124	0.356806	0.00384152	0.00604868	0.232393	314	1098	124	1000	1079	99	161	16761350	KLRC3 / NKG2-E	AF461157 / ENST00000381903 / ENST00000381904 / ENST00000396439 / ENST00000539033 / NM_002261 / NM_007333	cellular defense response	integral to membrane/membrane	transmembrane signaling receptor activity/carbohydrate binding
SNORD32B	0.149856	483	267	0	SNORD32B	FALSE	TRUE	TRUE	FALSE	FALSE	FALSE	TRUE	TRUE	TRUE	0	0.0542132	0.0173252	2.98975	0.0159477	0.0402706	0.0194791	0.0226501	0.00651644	0.408106	0.0889836	0.00173138	0.0149087	0.00402189	0.232647	315	188	924	715	28	267	115	17026087	SNORD32B	NR_003049	NA	NA	NA
SNORD32B	0.149856	483	267	0	SNORD32B	FALSE	TRUE	TRUE	FALSE	FALSE	FALSE	TRUE	TRUE	TRUE	0	0.0542132	0.0173252	2.98975	0.0159477	0.0402706	0.0194791	0.0226501	0.00651644	0.408106	0.0889836	0.00173138	0.0149087	0.00402189	0.232647	315	188	924	715	28	267	115	17027281	SNORD32B	NR_003049	NA	NA	NA
SNORD32B	0.149856	483	267	0	SNORD32B	FALSE	TRUE	TRUE	FALSE	FALSE	FALSE	TRUE	TRUE	TRUE	0	0.0542132	0.0173252	2.98975	0.0159477	0.0402706	0.0194791	0.0226501	0.00651644	0.408106	0.0889836	0.00173138	0.0149087	0.00402189	0.232647	315	188	924	715	28	267	115	17030127	SNORD32B	NR_003049	NA	NA	NA
SNORD32B	0.149856	483	267	0	SNORD32B	FALSE	TRUE	TRUE	FALSE	FALSE	FALSE	TRUE	TRUE	TRUE	0	0.0542132	0.0173252	2.98975	0.0159477	0.0402706	0.0194791	0.0226501	0.00651644	0.408106	0.0889836	0.00173138	0.0149087	0.00402189	0.232647	315	188	924	715	28	267	115	17032817	SNORD32B	NR_003049	NA	NA	NA
SNORD32B	0.149856	483	267	0	SNORD32B	FALSE	TRUE	TRUE	FALSE	FALSE	FALSE	TRUE	TRUE	TRUE	0	0.0542132	0.0173252	2.98975	0.0159477	0.0402706	0.0194791	0.0226501	0.00651644	0.408106	0.0889836	0.00173138	0.0149087	0.00402189	0.232647	315	188	924	715	28	267	115	17035002	SNORD32B	NR_003049	NA	NA	NA
SNORD32B	0.149856	483	267	0	SNORD32B	FALSE	TRUE	TRUE	FALSE	FALSE	FALSE	TRUE	TRUE	TRUE	0	0.0542132	0.0173252	2.98975	0.0159477	0.0402706	0.0194791	0.0226501	0.00651644	0.408106	0.0889836	0.00173138	0.0149087	0.00402189	0.232647	315	188	924	715	28	267	115	17037609	SNORD32B	NR_003049	NA	NA	NA
FAM111B	0.149815	703	1014	0	FAM111B	FALSE	FALSE	FALSE	FALSE	TRUE	FALSE	FALSE	TRUE	TRUE	0	0.030501	0.0116626	13.7606	0.00234193	0.0108664	0.0177231	0.0152985	0.120979	0.00036969	0.908915	0.286452	0.0233622	0.0363196	0.232785	321	1089	77	1431	1014	383	601	16725041	FAM111B	AY457926 / ENST00000343597 / ENST00000411426 / ENST00000528234 / ENST00000529618 / NM_001142703 / NM_001142704 / NM_198947	metabolic process	NA	catalytic activity
BLM	0.149746	861	1252	10	BLM	FALSE	FALSE	FALSE	FALSE	TRUE	FALSE	FALSE	TRUE	TRUE	0.271771	0.0218757	0.0115138	9.29221	0.0058706	0.00410177	0.018419	0.0149871	0.340363	0.00513775	0.557231	0.84948	0.0195286	0.0400309	0.233015	322	1344	233	1252	1430	336	636	16804902	BLM	AK295194 / BC093622 / BC101567 / BC115030 / BC115032 / BC143280 / ENST00000355112 / ENST00000558599 / ENST00000558825 / ENST00000559426 / ENST00000559724 / ENST00000560136 / ENST00000560509 / ENST00000560821 / GENSCAN00000017495 / NM_000057 / OTTHUMT00000313495 / OTTHUMT00000417940 / OTTHUMT00000417941 / OTTHUMT00000417944 / OTTHUMT00000417945 / OTTHUMT00000417946 / OTTHUMT00000417948 / OTTHUMT00…	regulation of cyclin-dependent protein serine/threonine kinase activity / G2 phase of mitotic cell cycle / telomere maintenance / double-strand break repair via homologous recombination / DNA double-strand break processing / DNA strand renaturation / ATP catabolic process / DNA repair / DNA recombination / response to DNA damage stimulus / response to X-ray / replication fork processing / G2 DNA …	chromosome, telomeric region/lateral element/male germ cell nucleus/nucleus/replication fork/nucleolus/cytoplasm/nuclear matrix/PML body/pronucleus/nuclear chromosome/intracellular	bubble DNA binding/p53 binding/single-stranded DNA binding/ATP-dependent DNA helicase activity/helicase activity/protein binding/ATP binding/ATP-dependent helicase activity/four-way junction helicase activity/ATPase activity/annealing helicase activity/ATP-dependent 3'-5' DNA helicase activity/G-quadruplex DNA binding/nucleotide binding/nucleic acid binding/DNA binding/catalytic activity/hydrolas…
NDRG1	0.149718	645	615	6	NDRG1	FALSE	TRUE	TRUE	FALSE	FALSE	TRUE	TRUE	FALSE	FALSE	0.220545	0.0383502	0.00240953	4.80505	0.0277019	0.0211325	0.00565313	0.0100704	0.0452486	0.113331	0.0133102	0.0405983	0.552337	0.187731	0.23311	323	658	615	218	527	1239	1104	17081401	NDRG1	AF004162 / AK124709 / AK126924 / AK129867 / AK296794 / AK298236 / AY277597 / BC003175 / BC006260 / CR456842 / D87953 / ENST00000323851 / ENST00000354944 / ENST00000414097 / ENST00000517331 / ENST00000517599 / ENST00000518010 / ENST00000518480 / ENST00000519228 / ENST00000519278 / ENST00000519580 / ENST00000520230 / ENST00000520943 / ENST00000521026 / ENST00000521414 / ENST00000521544 / ENST000005…	response to metal ion / DNA damage response, signal transduction by p53 class mediator / peripheral nervous system myelin maintenance / mast cell activation / cellular response to hypoxia / positive regulation of spindle checkpoint	nucleus/cytoplasm/centrosome/cytosol/microtubule/plasma membrane/cell-cell adherens junction/microtubule cytoskeleton/perinuclear region of cytoplasm/recycling endosome membrane/microtubule organizing center/cytoskeleton/membrane	protein binding/microtubule binding/Rab GTPase binding/gamma-tubulin binding/cadherin binding
HIST1H3G	0.149388	532	802	0	HIST1H3G	FALSE	TRUE	TRUE	FALSE	TRUE	FALSE	FALSE	FALSE	FALSE	0	0.0396064	0.00500589	11.7476	0.0134624	0.0153985	0.00851149	0.0100719	0.0386689	0.00114797	0.138924	0.11977	0.273959	0.187645	0.234224	324	598	126	810	802	1004	1103	17016403	HIST1H3A / HIST1H3B / HIST1H3C / HIST1H3D / HIST1H3E / HIST1H3F / HIST1H3G / HIST1H3H / HIST1H3I / HIST1H3J	BC012185 / ENST00000305910 / NM_003534	nucleosome assembly / blood coagulation / S phase / regulation of gene silencing	nucleosome/extracellular region/nucleus/nucleoplasm/chromosome	DNA binding/protein binding/protein heterodimerization activity
TMEM117	0.149339	491	576	0	TMEM117	FALSE	TRUE	TRUE	FALSE	FALSE	FALSE	TRUE	TRUE	TRUE	0	0.0391276	0.0133048	5.21261	0.0178313	0.0387338	0.0237469	0.0257517	0.0410542	0.084323	0.06412	0.00217552	0.00522717	0.00169342	0.23439	325	617	576	666	41	130	57	16750300	TMEM117	AK097511 / BC030284 / BC060798 / ENST00000266534 / ENST00000536799 / ENST00000546387 / ENST00000546868 / ENST00000546978 / ENST00000550495 / ENST00000550623 / ENST00000551577 / ENST00000553253 / GENSCAN00000039258 / NM_032256 / OTTHUMT00000403967 / OTTHUMT00000403968 / OTTHUMT00000403969 / OTTHUMT00000403970 / OTTHUMT00000403971 / OTTHUMT00000403972 / OTTHUMT00000403973 / OTTHUMT00000403974 / uc0…	biological_process	endoplasmic reticulum/integral to membrane/membrane	molecular_function
TIMP4	0.149073	739	1140	1	TIMP4	FALSE	FALSE	FALSE	FALSE	TRUE	FALSE	FALSE	TRUE	TRUE	0.0785596	0.0291427	0.00585888	9.61044	0.00370955	0.00831559	0.0320367	0.0257226	0.143182	0.00419789	0.778641	0.457945	0.000809357	0.00170694	0.235292	326	1140	216	1375	1181	28	59	16950825	TIMP4	BC010553 / ENST00000287814 / NM_003256	central nervous system development / response to lipopolysaccharide / response to cytokine stimulus / response to drug / ovulation cycle / response to peptide hormone stimulus / biological_process / response to hormone stimulus / negative regulation of peptidase activity	extracellular region/extracellular space/sarcomere	metalloendopeptidase inhibitor activity/metal ion binding/enzyme inhibitor activity/peptidase inhibitor activity/protein binding
SLC2A3	0.149	682	780	3	SLC2A3	FALSE	TRUE	FALSE	FALSE	TRUE	FALSE	FALSE	FALSE	FALSE	0.157119	0.0355225	0.00501802	8.65623	0.00434372	0.0158384	0.0136106	0.0132097	0.0645124	0.00774971	0.711916	0.110051	0.0693639	0.0700141	0.235541	327	832	269	1348	780	707	841	16760868	SLC2A3	AB209607 / AK304509 / BC039196 / ENST00000075120 / ENST00000476634 / ENST00000486749 / ENST00000490763 / ENST00000495813 / ENST00000541671 / ENST00000544291 / ENST00000544936 / M20681 / NM_006931 / OTTHUMT00000257914 / OTTHUMT00000257915 / OTTHUMT00000257916 / OTTHUMT00000257917 / OTTHUMT00000257918 / OTTHUMT00000399824 / OTTHUMT00000399827 / OTTHUMT00000399828 / OTTHUMT00000399829 / uc001qtr.3	carbohydrate metabolic process / vitamin metabolic process / water-soluble vitamin metabolic process / hexose transport / glucose transport / L-ascorbic acid metabolic process / small molecule metabolic process / transmembrane transport / transport / carbohydrate transport	plasma membrane/integral to membrane/membrane	glucose transmembrane transporter activity/transporter activity/transmembrane transporter activity/substrate-specific transmembrane transporter activity/folic acid binding/reduced folate carrier activity
SNORD105B	0.148609	428	338	0	SNORD105B	FALSE	TRUE	TRUE	FALSE	FALSE	TRUE	TRUE	TRUE	TRUE	0	0.046217	0.00929405	3.77479	0.0365928	0.0241829	0.0237991	0.0249292	0.0170601	0.238137	0.00387626	0.0233941	0.00516253	0.00212214	0.236874	328	338	757	91	353	125	70	16858120	SNORD105B	NR_003688	NA	NA	NA
TSPO	0.14823	631	691	1	TSPO	FALSE	TRUE	FALSE	FALSE	TRUE	FALSE	TRUE	FALSE	TRUE	0.0785596	0.0320092	0.00245372	7.066	0.0169513	0.0365411	0.0127363	0.017055	0.100226	0.0226043	0.074644	0.00303423	0.0878545	0.0210892	0.238175	329	1029	366	691	55	748	398	16930954	TSPO	ENST00000329563 / ENST00000337554 / ENST00000396265 / ENST00000428336 / ENST00000472378 / M36035 / NM_000714 / NM_001256530 / NM_001256531 / NR_046308	protein targeting to mitochondrion / steroid biosynthetic process / heme biosynthetic process / anion transport / apoptotic process / aging / steroid metabolic process / cell proliferation / glial cell migration / response to manganese ion / response to vitamin B1 / positive regulation of necrotic cell death / peripheral nervous system axon regeneration / adrenal gland development / regulation of…	mitochondrial outer membrane/integral to membrane/mitochondrion/membrane/mitochondrial membrane	androgen binding/benzodiazepine receptor activity/cholesterol binding/protein binding
RNY4P23	0.147885	423	291	0	RNY4P23	FALSE	TRUE	TRUE	FALSE	FALSE	FALSE	TRUE	TRUE	TRUE	0	0.0502923	0.0148632	4.83123	0.0124591	0.0346847	0.0191649	0.0211927	0.010402	0.111198	0.166913	0.00404778	0.0161442	0.00611951	0.239367	330	254	611	847	75	291	162	17104519	RNY4P23	ENST00000364507	NA	NA	NA
ACPP	0.147767	608	774	0	ACPP	FALSE	FALSE	FALSE	FALSE	TRUE	TRUE	FALSE	FALSE	FALSE	0	0.0304606	0.00236377	10.9405	0.0301505	0.015936	0.0119416	0.0141248	0.121589	0.00185095	0.00933053	0.108007	0.108982	0.052469	0.239772	331	1092	156	165	774	786	750	16945682	ACPP	BC016344 / ENST00000336375 / ENST00000351273 / ENST00000483689 / ENST00000489084 / ENST00000493235 / ENST00000512463 / NM_001099 / NM_001134194	purine nucleobase metabolic process / nucleotide metabolic process / adenosine metabolic process / dephosphorylation	extracellular region/intracellular/lysosomal membrane/multivesicular body/plasma membrane/integral to membrane/secretory granule/filopodium/Golgi cisterna/apical part of cell/lysosome/membrane	acid phosphatase activity/5'-nucleotidase activity/choline binding/identical protein binding/protein homodimerization activity/hydrolase activity
CXCL16	0.14771	658	660	5	CXCL16	FALSE	TRUE	TRUE	FALSE	FALSE	FALSE	TRUE	FALSE	FALSE	0.203074	0.0376591	0.00573341	4.5884	0.0180134	0.0306044	0.00718947	0.011994	0.0493413	0.132631	0.0621505	0.00779891	0.384302	0.102789	0.239971	332	710	633	660	135	1098	941	16840113	CXCL16	AF275260 / AF301016 / AF337812 / AK292114 / AY358909 / BC017588 / BC044930 / ENST00000293778 / ENST00000573123 / ENST00000574412 / ENST00000575168 / ENST00000576153 / GENSCAN00000039600 / NM_001100812 / NM_022059 / OTTHUMT00000207506 / OTTHUMT00000439576 / OTTHUMT00000439577 / OTTHUMT00000439578 / OTTHUMT00000439579 / uc002fyr.4 / uc002fys.4	receptor-mediated endocytosis / chemotaxis / positive regulation of cell growth / positive regulation of cell migration / response to cytokine stimulus / response to interferon-gamma / response to tumor necrosis factor / lymphocyte chemotaxis / transcription, DNA-dependent / regulation of transcription, DNA-dependent / regulation of transcription from RNA polymerase II promoter	extracellular region/extracellular space/plasma membrane/membrane/integral to membrane/nucleus/mediator complex	low-density lipoprotein receptor activity/scavenger receptor activity/receptor binding/chemokine activity/cytokine activity/RNA polymerase II transcription cofactor activity/protein binding
FLJ42393	0.14669	687	986	0	FLJ42393	FALSE	TRUE	TRUE	FALSE	FALSE	TRUE	FALSE	FALSE	FALSE	0	0.0825067	0.0046256	2.2902	0.034146	0.0115322	0.00252009	0.00665759	0.000289373	0.624075	0.00536269	0.25235	0.924522	0.503759	0.243533	333	54	1156	116	986	1455	1397	16949499	FLJ42393	AK124384 / ENST00000392468 / NR_024413	NA	NA	NA
CCNA1	0.146648	566	564	3	CCNA1	FALSE	TRUE	TRUE	FALSE	FALSE	FALSE	FALSE	TRUE	TRUE	0.157119	0.0438815	0.0114343	5.74257	0.0131473	0.0136736	0.0156468	0.0151097	0.0227341	0.0575293	0.147137	0.167086	0.0402388	0.038526	0.243681	334	404	536	820	891	564	627	16774053	CCNA1	BC036346 / ENST00000255465 / ENST00000418263 / ENST00000440264 / ENST00000449823 / ENST00000463403 / NM_001111045 / NM_001111046 / NM_001111047 / NM_003914	regulation of cyclin-dependent protein serine/threonine kinase activity / G1/S transition of mitotic cell cycle / regulation of transcription involved in G1/S phase of mitotic cell cycle / G2/M transition of mitotic cell cycle / mitotic cell cycle / mitosis / male meiosis I / spermatogenesis / cell division / cell cycle / regulation of cell cycle	nucleoplasm/cytosol/microtubule cytoskeleton/nucleus	protein binding/protein kinase binding
FAM177B	0.146539	590	322	0	FAM177B	FALSE	FALSE	FALSE	FALSE	TRUE	TRUE	FALSE	TRUE	TRUE	0	0.0314484	0.00674626	10.2847	0.0243564	0.00947553	0.022156	0.020226	0.107503	0.00275758	0.0220899	0.371543	0.00766966	0.00812231	0.244064	335	1057	184	322	1095	173	207	16677808	FAM177B	AK125494 / ENST00000360827 / ENST00000391880 / ENST00000434700 / ENST00000445590 / ENST00000456298 / ENST00000460763 / NM_207468	NA	NA	NA
ARID3B	0.146434	645	278	3	ARID3B	FALSE	TRUE	TRUE	FALSE	FALSE	TRUE	TRUE	FALSE	FALSE	0.157119	0.0507464	0.00279627	2.50324	0.0354099	0.025782	0.00328835	0.00971409	0.00984928	0.552953	0.00452887	0.017656	0.848868	0.209502	0.244434	336	249	1088	100	278	1413	1134	16803018	ARID3B	AF116846 / ENST00000346246 / ENST00000566468 / ENST00000569680 / NM_006465	transcription, DNA-dependent / regulation of transcription, DNA-dependent / biological_process	nucleus/intracellular	DNA binding
CLIP4	0.146398	581	521	3	CLIP4	FALSE	TRUE	TRUE	FALSE	TRUE	TRUE	FALSE	FALSE	FALSE	0.157119	0.0411607	0.00267288	5.9643	0.0289533	0.0127095	0.00886719	0.0111814	0.0318551	0.0490807	0.0110829	0.201273	0.249481	0.13276	0.244562	337	521	520	188	936	978	1011	16878616	CLIP4	AF433661 / AK057267 / AK291595 / AK302325 / AK304384 / AL834443 / BC107760 / BC126167 / BC136331 / ENST00000320081 / ENST00000401605 / ENST00000401617 / ENST00000404424 / ENST00000415891 / ENST00000438819 / ENST00000449202 / ENST00000456385 / ENST00000491701 / ENST00000493551 / GENSCAN00000015729 / NM_024692 / OTTHUMT00000215123 / OTTHUMT00000324913 / OTTHUMT00000324914 / OTTHUMT00000324915 / OTT…	NA	NA	protein binding
MIR181B1	0.146253	497	331	0	MIR181B1	FALSE	TRUE	TRUE	FALSE	FALSE	TRUE	TRUE	FALSE	TRUE	0	0.0618904	0.00317042	2.80056	0.0293029	0.024654	0.014676	0.0175579	0.00267511	0.461015	0.0105364	0.0215209	0.0521043	0.0180825	0.245074	338	130	976	178	331	648	350	16697660	MIR181B1	hsa-mir-181b-1 / NR_029612	NA	NA	NA
SNORD116-24	0.146036	508	646	0	SNORD116 24	FALSE	TRUE	TRUE	FALSE	FALSE	TRUE	FALSE	FALSE	TRUE	0	0.059046	0.0272848	3.06742	0.0413242	0.0175807	0.0147234	0.0174164	0.0037057	0.387742	0.00212874	0.0788798	0.0514485	0.018881	0.245844	339	150	903	62	705	646	364	16798216	SNORD116-24	NR_003338	NA	NA	NA
MIR21	0.145842	661	450	2	MIR21	FALSE	FALSE	FALSE	FALSE	TRUE	TRUE	TRUE	TRUE	TRUE	0.124514	0.0275762	0.0034326	6.28579	0.0313703	0.0222841	0.0171726	0.0192077	0.173603	0.0390441	0.00785328	0.0328979	0.0269501	0.0109886	0.246533	340	1181	460	144	450	431	254	16836624	MIR21 / VMP1	AY699265 / ENST00000592790 / hsa-mir-21 / NR_029493	autophagy / cell adhesion / embryo implantation / regulation of autophagy / cell-cell adhesion / cell junction assembly	pre-autophagosomal structure/autophagic vacuole membrane/vacuole/vacuolar membrane/endoplasmic reticulum/plasma membrane/membrane/integral to membrane/endoplasmic reticulum-Golgi intermediate compartment membrane	protein binding
CTSL1	0.145832	758	375	6	CTSL1	FALSE	FALSE	FALSE	FALSE	FALSE	TRUE	TRUE	TRUE	TRUE	0.220545	0.0293424	0.00307476	3.29648	0.0285671	0.02556	0.0177685	0.0199669	0.139689	0.332348	0.0117231	0.0183535	0.0230896	0.00876805	0.246569	341	1132	852	199	293	375	217	17086540	CTSL1	AK055599 / BC012612 / BC142983 / CR457053 / ENST00000340342 / ENST00000342020 / ENST00000343150 / ENST00000375894 / ENST00000482054 / ENST00000495822 / GENSCAN00000038779 / NM_001257971 / NM_001257972 / NM_001257973 / NM_001912 / NM_145918 / OTTHUMT00000052936 / OTTHUMT00000052937 / OTTHUMT00000052938 / OTTHUMT00000052939 / OTTHUMT00000052940 / OTTHUMT00000052941 / uc004aph.3 / uc004api.3 / uc004…	toll-like receptor signaling pathway / adaptive immune response / proteolysis / antigen processing and presentation / antigen processing and presentation of exogenous peptide antigen via MHC class II / extracellular matrix disassembly / extracellular matrix organization / collagen catabolic process / innate immune response / macrophage apoptotic process / cellular response to thyroid hormone stim…	extracellular region/nucleus/lysosome/endolysosome lumen/lysosomal lumen	cysteine-type endopeptidase activity/protein binding/cysteine-type peptidase activity/histone binding/peptidase activity/hydrolase activity
CD164L2	0.145664	751	1033	0	CD164L2	FALSE	FALSE	FALSE	FALSE	TRUE	FALSE	FALSE	TRUE	TRUE	0	0.0198346	0.00346968	14.7296	0.0081722	0.0105162	0.0189398	0.0166386	0.425473	0.000220202	0.369502	0.306056	0.0170954	0.0239693	0.247166	342	1378	60	1103	1033	306	437	16684014	CD164L2	BC137466 / ENST00000374025 / ENST00000374027 / ENST00000374030 / NM_207397	NA	integral to membrane/membrane	NA
PRAMEF22	0.144541	500	396	0	PRAMEF22	FALSE	TRUE	FALSE	FALSE	TRUE	TRUE	TRUE	TRUE	TRUE	0	0.0361181	0.0049363	6.81178	0.02528	0.0334998	0.0157293	0.0194869	0.0598644	0.0269717	0.0191577	0.00488124	0.03937	0.0101105	0.251204	343	792	396	294	91	552	239	16659395	PRAMEF22	ENST00000376187 / NM_001100631	positive regulation of cell proliferation / negative regulation of apoptotic process / negative regulation of cell differentiation / negative regulation of transcription, DNA-dependent / negative regulation of retinoic acid receptor signaling pathway	NA	retinoic acid receptor binding
SCARNA7	0.144485	488	674	0	SCARNA7	FALSE	TRUE	TRUE	FALSE	FALSE	FALSE	FALSE	TRUE	TRUE	0	0.0638496	0.0106295	3.41707	0.0173863	0.0177404	0.0205898	0.0198479	0.00214313	0.305942	0.069225	0.0765244	0.0112818	0.0090825	0.251409	344	112	820	674	698	224	222	16961037	SCARNA7	NR_003001	NA	NA	NA
IGFBP4	0.144432	903	934	23	IGFBP4	FALSE	TRUE	FALSE	FALSE	FALSE	FALSE	FALSE	TRUE	TRUE	0.360193	0.0337919	0.00594772	3.00653	0.0103596	0.00281582	0.0234406	0.0189131	0.0801645	0.403639	0.246237	0.943404	0.00562384	0.0120019	0.2516	345	934	920	972	1455	141	271	16834091	IGFBP4	BC016041 / ENST00000269593 / ENST00000542955 / NM_001552	skeletal system development / regulation of cell growth / DNA metabolic process / inflammatory response / signal transduction / cell proliferation / regulation of glucose metabolic process / positive regulation of MAPK cascade / positive regulation of insulin-like growth factor receptor signaling pathway / cellular protein metabolic process / type B pancreatic cell proliferation / regulation of g…	extracellular region/extracellular space	insulin-like growth factor binding/growth factor binding
NCAPG2	0.144134	852	1390	0	NCAPG2	FALSE	FALSE	FALSE	FALSE	TRUE	FALSE	FALSE	TRUE	FALSE	0	0.0193818	0.00240861	17.0754	0.00319931	0.00151281	0.0158434	0.0124013	0.446229	6.70613e-05	0.830711	0.991222	0.0381988	0.0903823	0.252685	346	1390	30	1400	1466	545	911	17064939	NCAPG2	AK301901 / BC020560 / BC028618 / BC043404 / BX537845 / ENST00000275830 / ENST00000356309 / ENST00000409339 / ENST00000409423 / ENST00000432615 / ENST00000441982 / ENST00000449727 / ENST00000467785 / ENST00000472591 / ENST00000474940 / ENST00000475918 / ENST00000491792 / ENST00000541468 / GENSCAN00000029052 / NM_017760 / OTTHUMT00000322655 / OTTHUMT00000327109 / OTTHUMT00000327110 / OTTHUMT0000032…	inner cell mass cell proliferation / mitosis / chromosome condensation / cell division / cell cycle	nucleus/nucleolus	methylated histone residue binding/protein binding/binding
SLC7A11	0.144009	681	824	3	SLC7A11	FALSE	TRUE	FALSE	FALSE	TRUE	FALSE	FALSE	TRUE	TRUE	0.157119	0.0356639	0.00257234	7.90368	0.00691472	0.00526374	0.0217323	0.0177528	0.0633768	0.0127646	0.464274	0.740784	0.00850664	0.0170406	0.253141	347	824	306	1173	1377	187	339	16979917	SLC7A11	AK290359 / ENST00000280612 / ENST00000509248 / NM_014331	ion transport / amino acid transport / response to oxidative stress / brain development / blood coagulation / response to toxic substance / response to nicotine / leukocyte migration / transmembrane transport / lens fiber cell differentiation / platelet aggregation / amino acid transmembrane transport / transport	rough endoplasmic reticulum/cytoskeleton/plasma membrane/integral to membrane/membrane/intracellular membrane-bounded organelle	protein binding/cystine:glutamate antiporter activity/amino acid transmembrane transporter activity
FANCA	0.14373	769	929	0	FANCA	FALSE	FALSE	FALSE	FALSE	TRUE	FALSE	FALSE	TRUE	TRUE	0	0.0187596	0.00461341	15.2165	0.0110886	0.00211277	0.0213276	0.0172719	0.47579	0.00017079	0.21503	0.975553	0.00939671	0.0197337	0.25416	348	1397	48	929	1462	197	376	16829369	FANCA	AK299282 / AK301168 / BC008979 / BC022498 / BC064540 / BC120978 / BC120979 / BC127633 / BC141971 / BC141972 / BT007366 / ENST00000305699 / ENST00000389301 / ENST00000389302 / ENST00000534992 / ENST00000543736 / ENST00000561660 / ENST00000561722 / ENST00000562424 / ENST00000563318 / ENST00000563510 / ENST00000563513 / ENST00000563673 / ENST00000564475 / ENST00000564870 / ENST00000564969 / ENST0000…	DNA repair / protein complex assembly / male meiosis / male gonad development / female gonad development / regulation of cell proliferation / response to DNA damage stimulus	nucleus/nucleoplasm/cytoplasm/Fanconi anaemia nuclear complex	protein binding
HIST1H2AI	0.143374	488	245	0	HIST1H2AI	FALSE	TRUE	TRUE	FALSE	FALSE	TRUE	TRUE	FALSE	FALSE	0	0.0634644	0.00541968	3.15728	0.0265449	0.0268571	0.00949944	0.0138128	0.00223822	0.365183	0.0158136	0.0146559	0.210872	0.0578835	0.255469	349	117	878	245	230	932	787	17005858	HIST1H2AG / HIST1H2AH / HIST1H2AI / HIST1H2AK / HIST1H2AL / HIST1H2AM / HIST1H3F	BC062305 / BC112254 / ENST00000358739 / NM_003509	nucleosome assembly / blood coagulation / S phase / regulation of gene silencing	nucleosome/nucleus/chromosome/intracellular/extracellular region/nucleoplasm	DNA binding/protein binding/enzyme binding/protein heterodimerization activity/sequence-specific DNA binding
ND6	0.143191	528	422	0	ND6	FALSE	TRUE	TRUE	FALSE	FALSE	FALSE	TRUE	TRUE	TRUE	0	0.0643914	0.0165953	2.73489	0.0186772	0.0242802	0.0172376	0.0185313	0.00201648	0.480444	0.0555087	0.0229931	0.0264983	0.0134615	0.256144	350	108	1006	643	343	422	291	17100697	ND6	ENST00000361681 / NC_001807	oxidation-reduction process / respiratory electron transport chain / mitochondrial electron transport, NADH to ubiquinone / small molecule metabolic process / cellular metabolic process	integral to membrane/mitochondrion/mitochondrial inner membrane/mitochondrial respiratory chain complex I/membrane/mitochondrial membrane/respiratory chain	NADH dehydrogenase (ubiquinone) activity/oxidoreductase activity
XRCC2	0.142752	813	1355	0	XRCC2	FALSE	FALSE	FALSE	FALSE	TRUE	FALSE	FALSE	TRUE	TRUE	0	0.0197776	0.00768899	15.7168	0.00416813	0.00341193	0.0200376	0.0159442	0.428051	0.000132082	0.730448	0.90477	0.0129519	0.0297089	0.257773	351	1380	43	1355	1442	251	513	17064679	XRCC2	BC042137	double-strand break repair via homologous recombination / in utero embryonic development / DNA repair / meiosis / response to X-ray / response to gamma radiation / negative regulation of neuron apoptotic process / positive regulation of neurogenesis / DNA metabolic process / DNA recombination / response to DNA damage stimulus	nucleus	DNA binding/ATP binding/DNA-dependent ATPase activity/protein binding
IFNE	0.142687	474	526	0	IFNE	FALSE	TRUE	TRUE	FALSE	FALSE	FALSE	TRUE	FALSE	FALSE	0	0.0540109	0.0100104	5.82728	0.0139834	0.0354867	0.00564394	0.0113127	0.00667413	0.0541373	0.126392	0.0035712	0.553456	0.127396	0.258014	352	198	526	787	64	1240	1003	17092875	IFNE	AY358570 / ENST00000448696 / NM_176891	defense response to virus / defense response / defense response to bacterium	extracellular space/extracellular region	cytokine activity/cytokine receptor binding
TRPV3	0.142594	693	673	5	TRPV3	FALSE	FALSE	FALSE	FALSE	FALSE	TRUE	FALSE	TRUE	TRUE	0.203074	0.034848	0.00644784	4.30496	0.0233287	0.0173001	0.016451	0.0171657	0.0702129	0.162853	0.0259442	0.0832034	0.0325474	0.0203856	0.258361	353	879	673	369	721	492	391	16839710	TRPV3	AF514998 / AK074032 / AK092557 / AK304768 / AY118267 / AY118268 / BC104866 / BC104868 / BC143294 / BC143295 / BC143299 / BC143330 / ENST00000301365 / ENST00000381913 / ENST00000571005 / ENST00000571139 / ENST00000572519 / ENST00000573539 / ENST00000574773 / ENST00000575865 / ENST00000576742 / ENST00000577016 / EU295940 / GENSCAN00000008653 / NM_001258205 / NM_145068 / OTTHUMT00000207379 / OTTHUMT…	response to temperature stimulus / negative regulation of hair cycle / transport / ion transport / calcium ion transport / transmembrane transport / calcium ion transmembrane transport	integral to membrane/membrane	calcium channel activity/ion channel activity/cation channel activity/protein binding
CLCN7	0.142297	579	674	0	CLCN7	FALSE	TRUE	FALSE	FALSE	TRUE	FALSE	FALSE	FALSE	TRUE	0	0.0358081	0.00231786	10.6729	0.0187299	0.0123688	0.014227	0.0142925	0.0622402	0.00217537	0.0550149	0.214923	0.0587656	0.0497729	0.259467	354	813	170	642	945	674	732	16822728	CLCN7	AF224741 / AK096963 / AK122944 / AK128285 / AK291404 / AK292136 / AK304796 / AK315978 / BC012737 / ENST00000262318 / ENST00000382745 / ENST00000448525 / ENST00000561665 / ENST00000563642 / ENST00000563822 / ENST00000564568 / ENST00000565092 / ENST00000567139 / ENST00000567836 / ENST00000569851 / GENSCAN00000028844 / NM_001114331 / NM_001287 / OTTHUMT00000103598 / OTTHUMT00000432506 / OTTHUMT00000…	transport / response to pH / ion transmembrane transport / transmembrane transport / chloride transport / ion transport	lysosomal membrane/integral to membrane/cytoplasmic vesicle/membrane/lysosome	voltage-gated chloride channel activity/chloride channel activity/ATP binding/antiporter activity/protein binding/ion channel activity/nucleotide binding/adenyl nucleotide binding
MIR4692	0.141432	727	752	0	MIR4692	FALSE	TRUE	TRUE	FALSE	FALSE	FALSE	TRUE	FALSE	TRUE	0	0.0577022	0.0186328	1.95212	0.00248961	0.0560855	0.0126778	0.0190634	0.00432956	0.740519	0.896651	0.000201989	0.0892581	0.0114732	0.262725	355	161	1295	1422	4	752	263	16728729	MIR4692	hsa-mir-4692 / NR_039841	NA	NA	NA
RNA5SP348	0.141389	614	343	0	RNA5SP348	FALSE	TRUE	TRUE	FALSE	FALSE	TRUE	TRUE	TRUE	TRUE	0	0.0430409	0.0131472	2.04256	0.0238325	0.0348137	0.0322182	0.031952	0.0252238	0.709436	0.0239698	0.00396673	0.000778763	0.000335354	0.262886	356	439	1255	343	72	26	18	16730701	RNA5SP348	ENST00000516442	NA	NA	NA
GJA1	0.141389	789	724	7	GJA1	FALSE	FALSE	FALSE	FALSE	TRUE	FALSE	FALSE	TRUE	TRUE	0.235679	0.0251954	0.00522597	6.43049	0.0122354	0.017179	0.0170946	0.0167037	0.231494	0.0352463	0.173927	0.0851448	0.0275037	0.023493	0.262887	357	1251	442	859	724	436	432	17012148	GJA1	BC026329 / ENST00000282561 / NM_000165	osteoblast differentiation / in utero embryonic development / neuron migration / heart looping / epithelial cell maturation / lens development in camera-type eye / atrial ventricular junction remodeling / transport / apoptotic process / muscle contraction / signal transduction / cell-cell signaling / heart development / adult heart development / negative regulation of cell proliferation / respons…	Golgi membrane/mitochondrial outer membrane/lysosome/early endosome/multivesicular body/endoplasmic reticulum membrane/Golgi apparatus/cytosol/intermediate filament/plasma membrane/integral to plasma membrane/fascia adherens/gap junction/connexon complex/intercalated disc/apical plasma membrane/lateral plasma membrane/Golgi-associated vesicle membrane/contractile fiber/membrane raft/cytoplasm/end…	signal transducer activity/receptor binding/gap junction channel activity/protein binding/ion transmembrane transporter activity/SH3 domain binding/PDZ domain binding/beta-tubulin binding/scaffold protein binding/protein domain specific binding/transmembrane transporter activity
ATAD2	0.141033	802	1279	1	ATAD2	FALSE	FALSE	FALSE	FALSE	TRUE	FALSE	FALSE	TRUE	TRUE	0.0785596	0.0211264	0.00469449	12.8982	0.00549066	0.0067244	0.0192111	0.0159866	0.369977	0.000594865	0.594019	0.598307	0.0159561	0.029321	0.264238	358	1358	98	1279	1286	288	505	17080749	ATAD2	CR749832 / ENST00000287394 / ENST00000517666 / ENST00000519124 / ENST00000521496 / ENST00000534257 / NM_014109	transcription, DNA-dependent / regulation of transcription, DNA-dependent / ATP catabolic process	nucleus/nucleolus	ATP binding/ATPase activity/nucleotide binding/hydrolase activity/nucleoside-triphosphatase activity/protein binding
DSN1	0.140952	780	1086	0	DSN1	FALSE	FALSE	FALSE	FALSE	TRUE	FALSE	FALSE	TRUE	TRUE	0	0.0152585	0.00407633	15.5405	0.00840666	0.00935202	0.0179698	0.0157366	0.659372	0.00014453	0.353885	0.380063	0.0219198	0.0316876	0.264547	359	1442	45	1086	1103	367	537	16918976	DSN1	AK290738 / ENST00000373734 / ENST00000373745 / ENST00000373750 / ENST00000426836 / ENST00000447406 / ENST00000448110 / ENST00000480153 / ENST00000492703 / NM_001145315 / NM_001145316 / NM_001145317 / NM_001145318 / NM_024918	mitotic cell cycle / chromosome segregation / mitosis / cell division / cell cycle / M phase of mitotic cell cycle / mitotic prometaphase	MIS12/MIND type complex/nucleus/cytoplasm/cytosol/chromosome, centromeric region/kinetochore/condensed chromosome kinetochore/chromosome	protein binding
MIR3671	0.140842	523	261	0	MIR3671	FALSE	TRUE	TRUE	FALSE	FALSE	TRUE	TRUE	TRUE	TRUE	0	0.0571764	0.0230707	2.45282	0.0217802	0.0260388	0.0222995	0.0228794	0.00460264	0.569464	0.033219	0.0168841	0.00740648	0.00376774	0.264968	360	167	1107	456	261	168	108	16688210	MIR3671	hsa-mir-3671 / NR_037443	NA	NA	NA
POLQ	0.140817	593	826	0	POLQ	FALSE	TRUE	FALSE	FALSE	TRUE	TRUE	FALSE	FALSE	FALSE	0	0.0356206	0.00674534	11.2881	0.0207572	0.0139984	0.00793534	0.0100143	0.0637227	0.00150418	0.0392399	0.156921	0.318167	0.191011	0.265065	361	826	142	519	872	1044	1110	16957951	POLQ	AY032677 / ENST00000264233 / ENST00000474243 / NM_199420	DNA replication / DNA repair / response to DNA damage stimulus	nucleoplasm	damaged DNA binding/DNA-directed DNA polymerase activity/ATP binding/ATP-dependent helicase activity/single-stranded DNA-dependent ATPase activity/nucleotide binding/nucleic acid binding/DNA binding/helicase activity/transferase activity/nucleotidyltransferase activity/hydrolase activity
SNORA55	0.140728	429	272	0	SNORA55	FALSE	TRUE	TRUE	FALSE	FALSE	TRUE	TRUE	FALSE	TRUE	0	0.0536009	0.00756011	4.37277	0.0298784	0.0258473	0.0112141	0.0152083	0.00700618	0.15506	0.00970021	0.0174563	0.132769	0.0373569	0.265404	362	202	661	169	272	832	615	16685702	SNORA55	NR_002983	NA	NA	NA
PTMA	0.140626	696	540	2	PTMA	FALSE	TRUE	FALSE	FALSE	FALSE	FALSE	TRUE	TRUE	TRUE	0.124514	0.0333069	0.0238392	5.71309	0.00218877	0.0282399	0.0237533	0.022704	0.0851918	0.0587606	0.920963	0.0115741	0.00521911	0.0039605	0.265792	363	963	540	1436	188	127	112	16748449	LOC100506248 / LOC728026 / MIR1244-1 / MIR1244-2 / MIR1244-3 / PTMA	BC071879 / BC098420 / ENST00000341369 / ENST00000448874 / ENST00000481928 / hsa-mir-1244-1 / hsa-mir-1244-2 / hsa-mir-1244-3 / M14630 / n409784 / n409785 / n409786 / n409787 / n409987 / n409988 / n409989 / n409990 / n409991 / n409992 / n409993 / n409994 / NM_001099285 / NM_002823 / NR_036052 / NR_036262 / NR_036263 / uc021qun.1 / uc021qvi.1 / uc021vyc.1 / uc021ycv.1	transcription, DNA-dependent	nucleus/nucleolus/cytoplasm	NA
PTMA	0.140626	696	540	2	PTMA	FALSE	TRUE	FALSE	FALSE	FALSE	FALSE	TRUE	TRUE	TRUE	0.124514	0.0333069	0.0238392	5.71309	0.00218877	0.0282399	0.0237533	0.022704	0.0851918	0.0587606	0.920963	0.0115741	0.00521911	0.0039605	0.265792	363	963	540	1436	188	127	112	16988297	LOC100506248 / LOC728026 / MIR1244-1 / MIR1244-2 / MIR1244-3 / PTMA	BC003510 / BC022433 / BC034921 / BC066905 / BC071647 / BC071879 / BC098420 / ENST00000341369 / ENST00000409115 / ENST00000448874 / ENST00000481928 / hsa-mir-1244-1 / hsa-mir-1244-2 / hsa-mir-1244-3 / M14630 / M26708 / n342466 / n409784 / n409785 / n409786 / n409787 / n409987 / n409988 / n409989 / n409990 / n409991 / n409992 / n409993 / n409994 / NM_001099285 / NM_002823 / NR_036052 / NR_036262 / …	transcription, DNA-dependent	nucleus/nucleolus/cytoplasm	NA
ARHGAP11A	0.140593	733	989	0	ARHGAP11A	FALSE	TRUE	FALSE	FALSE	TRUE	FALSE	FALSE	FALSE	FALSE	0	0.0327993	0.00540077	14.0581	0.00204818	0.0108429	0.00922093	0.00889353	0.0907884	0.000314763	0.931366	0.287733	0.227138	0.268668	0.265921	365	989	73	1441	1015	954	1225	16798919	ARHGAP11A	BC063444 / ENST00000361627 / ENST00000564918 / ENST00000567348 / NM_014783 / NM_199357	small GTPase mediated signal transduction / regulation of small GTPase mediated signal transduction / signal transduction / positive regulation of GTPase activity	cytosol/intracellular	GTPase activator activity
HIST1H4J	0.139909	691	611	0	HIST1H4J	FALSE	FALSE	FALSE	FALSE	TRUE	FALSE	TRUE	TRUE	TRUE	0	0.0214995	0.00475627	12.0463	0.0108978	0.0200662	0.0198037	0.0191053	0.354994	0.000965348	0.222786	0.0494393	0.0137362	0.0113301	0.268554	366	1353	119	935	611	260	257	17005868	HIST1H4A / HIST1H4B / HIST1H4C / HIST1H4D / HIST1H4E / HIST1H4F / HIST1H4H / HIST1H4I / HIST1H4J / HIST1H4K / HIST1H4L / HIST2H4A / HIST2H4B / HIST4H4	AK312028 / BC148271 / ENST00000355057 / ENST00000357549 / NM_003541 / NM_021968	telomere maintenance / chromatin organization / nucleosome assembly / CENP-A containing nucleosome assembly at centromere / negative regulation of megakaryocyte differentiation / phosphatidylinositol-mediated signaling / DNA-dependent transcription, initiation	nucleosome/extracellular region/nucleus/nucleoplasm/chromosome/nucleolus/actin cytoskeleton	DNA binding/protein binding/protein heterodimerization activity
LGALS1	0.139695	859	811	12	LGALS1	FALSE	TRUE	TRUE	FALSE	FALSE	FALSE	TRUE	FALSE	FALSE	0.290705	0.0392936	0.00516672	1.91714	0.0116959	0.0259835	0.0114941	0.0139258	0.0402107	0.752433	0.192141	0.0170472	0.123057	0.0558599	0.269383	367	611	1311	889	264	811	769	16929855	LGALS1	BC020675 / ENST00000215909 / ENST00000425542 / ENST00000454173 / ENST00000464120 / ENST00000472321 / ENST00000489315 / NM_002305	plasma cell differentiation / apoptotic process / signal transduction / negative regulation of cell-substrate adhesion / negative regulation of neuron projection development / T cell costimulation / multicellular organismal response to stress / positive regulation of erythrocyte aggregation / response to drug / regulation of apoptotic process / positive regulation of I-kappaB kinase/NF-kappaB cas…	proteinaceous extracellular matrix/extracellular space/intracellular/nucleus/cytoplasm/cell surface/extracellular matrix/extracellular region	glycoprotein binding/signal transducer activity/galactoside binding/lactose binding/protein homodimerization activity/laminin binding/protein binding/carbohydrate binding
SNORD51	0.139433	422	338	0	SNORD51	FALSE	TRUE	TRUE	FALSE	FALSE	TRUE	FALSE	TRUE	TRUE	0	0.0520371	0.00367261	5.01749	0.0256957	0.0165759	0.0183874	0.0186945	0.00843873	0.0971365	0.0179799	0.0955376	0.0196879	0.0128162	0.270402	368	224	589	276	743	338	280	16889954	SNORD51	NR_002589	NA	NA	NA
HIST1H2BC	0.139018	469	364	0	HIST1H2BC	FALSE	TRUE	TRUE	FALSE	TRUE	TRUE	FALSE	TRUE	TRUE	0	0.0453072	0.00540267	8.67278	0.0193331	0.00244322	0.0203816	0.0173045	0.0190736	0.00766629	0.0496983	0.962341	0.0118832	0.0195377	0.272021	369	364	267	629	1460	235	374	17005603	HIST1H2BC / HIST1H2BE / HIST1H2BF / HIST1H2BG / HIST1H2BI	BC101653 / ENST00000377733 / NM_003525	nucleosome assembly / defense response to bacterium	nucleosome/nucleus/intracellular/chromosome	DNA binding/protein heterodimerization activity/sequence-specific DNA binding
PCNA-AS1	0.139009	568	477	0	PCNA AS1	FALSE	FALSE	FALSE	FALSE	TRUE	TRUE	FALSE	TRUE	TRUE	0	0.0350879	0.0107277	6.22559	0.0246085	0.0163555	0.0309219	0.027968	0.06813	0.0407469	0.0212435	0.0996556	0.00102749	0.000933935	0.272056	370	861	477	316	753	32	34	16911149	PCNA-AS1	NR_028370	NA	NA	NA
IGLJ7	0.1388	422	376	0	IGLJ7	FALSE	TRUE	TRUE	FALSE	FALSE	TRUE	TRUE	TRUE	TRUE	0	0.0470383	0.0117875	5.15064	0.0232142	0.0215467	0.0203972	0.0208235	0.0154307	0.0881953	0.0264177	0.0376293	0.0118369	0.00681528	0.272875	371	320	577	376	500	234	176	16927867	IGLJ7	ENST00000390330	NA	NA	NA
UBE2C	0.138233	579	583	3	UBE2C	FALSE	TRUE	TRUE	FALSE	FALSE	TRUE	FALSE	FALSE	FALSE	0.157119	0.0450641	0.00781744	5.06708	0.0255118	0.0148335	0.00576229	0.00891995	0.0196518	0.0937039	0.0184908	0.133551	0.53912	0.266552	0.275111	372	375	583	284	827	1228	1220	16914315	UBE2C	BC032677 / ENST00000243893 / ENST00000335046 / ENST00000352551 / ENST00000356455 / ENST00000372568 / ENST00000405520 / ENST00000496085 / NM_007019 / NM_181799 / NM_181800 / NM_181801 / NM_181802 / NM_181803	mitotic cell cycle / ubiquitin-dependent protein catabolic process / cell cycle / spindle organization / mitotic spindle assembly checkpoint / cyclin catabolic process / exit from mitosis / free ubiquitin chain polymerization / protein ubiquitination / anaphase-promoting complex-dependent proteasomal ubiquitin-dependent protein catabolic process / positive regulation of exit from mitosis / phosph…	nucleoplasm/anaphase-promoting complex/cytosol	ubiquitin-protein ligase activity/protein binding/ATP binding/nucleotide binding/ligase activity/acid-amino acid ligase activity
BMP5	0.138044	714	626	1	BMP5	FALSE	FALSE	FALSE	FALSE	TRUE	FALSE	FALSE	TRUE	TRUE	0.0785596	0.0225216	0.00566775	8.98877	0.0105989	0.0199567	0.0241386	0.0223133	0.316369	0.00624333	0.235516	0.0504557	0.00476247	0.00442814	0.275861	373	1325	250	958	626	119	127	17020258	BMP5	ENST00000370830 / ENST00000446683 / M60314 / NM_021073	skeletal system development / ossification / type B pancreatic cell development / negative regulation of cell proliferation / negative regulation of epithelial to mesenchymal transition / positive regulation of pathway-restricted SMAD protein phosphorylation / negative regulation of steroid biosynthetic process / negative regulation of aldosterone biosynthetic process / growth / negative regulati…	extracellular space/membrane-bounded vesicle/cellular_component/extracellular region	cytokine activity/growth factor activity/BMP receptor binding
ZNF493	0.137989	439	382	0	ZNF493	FALSE	TRUE	TRUE	FALSE	TRUE	TRUE	FALSE	TRUE	TRUE	0	0.0515126	0.00703215	6.91432	0.0228836	0.00569537	0.0180364	0.0163835	0.00898477	0.0251125	0.027838	0.698334	0.0215467	0.0259313	0.27608	374	235	382	393	1348	360	464	16860183	ZNF493	BC006408 / ENST00000339914 / ENST00000355504 / ENST00000392288 / NM_001076678 / NM_145326 / NM_175910	transcription, DNA-dependent / regulation of transcription, DNA-dependent	nucleus/intracellular	DNA binding/zinc ion binding/nucleic acid binding/metal ion binding
JAG1	0.137895	813	894	14	JAG1	FALSE	TRUE	FALSE	FALSE	FALSE	TRUE	FALSE	FALSE	FALSE	0.306924	0.0344395	0.00261509	4.32673	0.0246865	0.00677611	0.00803855	0.00921547	0.0739073	0.16031	0.0209889	0.593415	0.309818	0.24387	0.276454	375	894	667	313	1284	1035	1187	16917183	JAG1	AF003837 / ENST00000254958 / ENST00000423891 / NM_000214	angiogenesis / cell fate determination / morphogenesis of an epithelial sheet / pulmonary valve morphogenesis / cardiac right ventricle morphogenesis / Notch signaling pathway / Notch receptor processing / multicellular organismal development / nervous system development / hemopoiesis / keratinocyte differentiation / regulation of cell migration / response to muramyl dipeptide / aorta morphogenes…	extracellular region/plasma membrane/integral to plasma membrane/membrane/apical part of cell/integral to membrane	Notch binding/structural molecule activity/calcium ion binding/growth factor activity/protein binding
ADORA1	0.137889	1029	1217	16	ADORA1	FALSE	FALSE	FALSE	FALSE	FALSE	FALSE	TRUE	TRUE	TRUE	0.321109	0.0262156	0.00600573	1.86655	0.00610062	0.0256117	0.02463	0.0232495	0.204817	0.769502	0.535686	0.0181887	0.00424059	0.00339257	0.276475	376	1217	1327	1229	287	111	100	16676130	ADORA1	AK127752 / AK289928 / AK293647 / AK308733 / AK316106 / BC026340 / EF057066 / ENST00000309502 / ENST00000337894 / ENST00000367235 / ENST00000367236 / ENST00000464019 / ENST00000467253 / ENST00000472535 / L22214 / NM_000674 / NM_001048230 / OTTHUMT00000100273 / OTTHUMT00000100274 / OTTHUMT00000101318 / OTTHUMT00000101319 / OTTHUMT00000101320 / OTTHUMT00000101321 / uc001gze.1 / uc001gzf.1 / uc009xak…	activation of MAPKK activity / temperature homeostasis / response to hypoxia / regulation of respiratory gaseous exchange by neurological system process / negative regulation of acute inflammatory response / negative regulation of leukocyte migration / positive regulation of peptide secretion / regulation of glomerular filtration / protein targeting to membrane / phagocytosis / inflammatory respo…	endoplasmic reticulum/plasma membrane/integral to plasma membrane/endomembrane system/postsynaptic density/basolateral plasma membrane/axolemma/asymmetric synapse/presynaptic membrane/neuronal cell body/terminal bouton/postsynaptic membrane/presynaptic active zone/membrane/integral to membrane/dendrite/cell body	G-protein coupled adenosine receptor activity/G-protein coupled receptor binding/purine nucleoside binding/phospholipase C activity/protein binding/G-protein beta/gamma-subunit complex binding/heterotrimeric G-protein binding/protein heterodimerization activity/signal transducer activity/G-protein coupled receptor activity
SNORD116-21	0.13758	660	929	0	SNORD116 21	FALSE	FALSE	FALSE	FALSE	TRUE	FALSE	TRUE	FALSE	TRUE	0	0.0297133	0.00411392	9.36989	0.0107487	0.0391121	0.00951725	0.0145523	0.133416	0.00488944	0.229044	0.00205586	0.20987	0.0458729	0.277707	377	1115	228	943	38	929	697	16798208	SNORD116-21 / SNORD116@	AF241255 / NR_003335	NA	NA	NA
SLC7A5	0.137444	741	742	4	SLC7A5	FALSE	TRUE	FALSE	FALSE	TRUE	FALSE	FALSE	TRUE	TRUE	0.18241	0.032976	0.00387844	6.8091	0.00150936	0.0166091	0.0183293	0.016641	0.0887999	0.0270222	0.964639	0.0949323	0.0199832	0.0239515	0.278251	378	980	397	1455	742	341	436	16829085	SLC7A5	AF104032 / ENST00000261622 / ENST00000563489 / NM_003486	cellular amino acid metabolic process / transport / ion transport / amino acid transport / nervous system development / blood coagulation / neutral amino acid transport / cell differentiation / leukocyte migration / transmembrane transport / amino acid transmembrane transport / multicellular organismal development / L-amino acid transport	cytosol/plasma membrane/integral to membrane/apical plasma membrane/cytoplasm/membrane	amino acid transmembrane transporter activity/neutral amino acid transmembrane transporter activity/L-amino acid transmembrane transporter activity/peptide antigen binding
ACTN1	0.137166	644	694	3	ACTN1	FALSE	TRUE	TRUE	FALSE	FALSE	TRUE	FALSE	FALSE	FALSE	0.157119	0.0609832	0.00399233	4.11912	0.0208655	0.00567219	0.00278573	0.00477346	0.00296659	0.186202	0.038549	0.700619	0.900964	0.765952	0.279365	379	135	694	510	1350	1447	1465	16794177	ACTN1	AK124378 / AK294317 / AK295099 / AK298496 / AK299362 / BC003576 / BC015766 / BT007207 / BX248020 / BX641076 / DQ496098 / ENST00000193403 / ENST00000376839 / ENST00000394419 / ENST00000438964 / ENST00000538545 / ENST00000553882 / ENST00000554158 / ENST00000554508 / ENST00000555616 / ENST00000556083 / ENST00000556433 / EU716325 / FJ410030 / GENSCAN00000015920 / M95178 / NM_001102 / NM_001130004 / N…	platelet degranulation / blood coagulation / platelet activation / cell junction assembly / regulation of apoptotic process / focal adhesion assembly / actin filament bundle assembly / negative regulation of cellular component movement / actin crosslink formation / extracellular matrix organization	ruffle/extracellular region/nucleus/cytoplasm/cytosol/cytoskeleton/plasma membrane/fascia adherens/focal adhesion/Z disc/platelet alpha granule lumen/pseudopodium/cell projection/dendritic spine/extracellular vesicular exosome/membrane	integrin binding/calcium ion binding/protein binding/vinculin binding/protein domain specific binding/ion channel binding/actin filament binding/actin binding/metal ion binding
TBC1D16	0.136894	610	680	2	TBC1D16	FALSE	TRUE	TRUE	FALSE	FALSE	TRUE	FALSE	FALSE	TRUE	0.124514	0.037997	0.00703249	5.67271	0.0264732	0.0142142	0.013768	0.0149011	0.0472958	0.0604912	0.015985	0.150514	0.0664841	0.0411229	0.28046	380	680	547	250	863	696	651	16849652	TBC1D16	BC028290 / ENST00000310924 / ENST00000572862 / NM_001271844 / NM_001271845 / NM_001271846 / NM_019020	regulation of Rab GTPase activity / positive regulation of Rab GTPase activity / positive regulation of GTPase activity	intracellular	Rab GTPase activator activity/GTPase activator activity
STRA13	0.136789	695	843	2	STRA13	FALSE	TRUE	FALSE	FALSE	TRUE	FALSE	TRUE	FALSE	FALSE	0.124514	0.0324784	0.00317489	8.01876	0.00892642	0.0223284	0.0109535	0.0126804	0.094511	0.0118163	0.321443	0.0326344	0.14249	0.0827546	0.280887	381	1011	293	1054	449	843	891	16850063	STRA13	ENST00000306704 / ENST00000392359 / ENST00000577379 / ENST00000579520 / ENST00000580090 / ENST00000580435 / ENST00000583767 / ENST00000584347 / ENST00000584514 / ENST00000584600 / ENST00000585091 / GENSCAN00000003559 / NM_001271006 / NM_001271007 / OTTHUMT00000255173 / OTTHUMT00000255174 / OTTHUMT00000441992 / OTTHUMT00000441993 / OTTHUMT00000441994 / OTTHUMT00000441995 / OTTHUMT00000441996 / OTT…	resolution of meiotic recombination intermediates / DNA repair / mitosis / replication fork processing / positive regulation of protein ubiquitination / cell division / response to DNA damage stimulus / cell cycle / kinetochore assembly	condensed chromosome kinetochore/Fanconi anaemia nuclear complex/FANCM-MHF complex/chromosome, centromeric region/kinetochore/nucleus/chromosome	DNA binding/double-stranded DNA binding/protein binding/protein heterodimerization activity
LOC145694	0.136685	497	482	0	LOC145694	FALSE	TRUE	TRUE	FALSE	TRUE	TRUE	FALSE	FALSE	FALSE	0	0.0602913	0.00325845	6.15738	0.0312692	0.00919257	0.00434376	0.00739568	0.00321111	0.0427702	0.00796538	0.391301	0.719276	0.413834	0.281305	382	140	482	147	1114	1343	1349	16811161	LOC145694	AK056793 / ENST00000558107 / ENST00000558617 / ENST00000560539	NA	NA	NA
MIR548K	0.136673	646	214	0	MIR548K	FALSE	TRUE	TRUE	FALSE	FALSE	FALSE	TRUE	TRUE	TRUE	0	0.0635522	0.0224139	1.72927	0.0102021	0.0272318	0.0229845	0.0226272	0.00221617	0.814457	0.253561	0.0137424	0.00627476	0.00404822	0.281354	383	116	1371	983	214	152	121	16728384	MIR548K	hsa-mir-548k / NR_031624	NA	NA	NA
ZSCAN4	0.13666	446	440	0	ZSCAN4	FALSE	TRUE	TRUE	FALSE	TRUE	TRUE	FALSE	FALSE	FALSE	0	0.0500592	0.0103984	6.4726	0.0313272	0.01624	0.00829582	0.0115391	0.010698	0.0342147	0.0079009	0.101887	0.28983	0.118636	0.281406	384	258	440	145	756	1019	980	16866115	ZSCAN4	BC101740 / ENST00000318203 / NM_152677	transcription, DNA-dependent / telomere maintenance via telomere lengthening / viral reproduction / regulation of transcription, DNA-dependent	nuclear chromosome, telomeric region/chromosome, telomeric region/nucleus/chromosome/intracellular	DNA binding/sequence-specific DNA binding transcription factor activity/zinc ion binding/nucleic acid binding/metal ion binding
SNORA33	0.136047	575	809	0	SNORA33	FALSE	TRUE	TRUE	FALSE	FALSE	TRUE	FALSE	FALSE	FALSE	0	0.063157	0.00496281	2.79892	0.0418957	0.0109088	0.0115635	0.013982	0.00231728	0.461495	0.00198475	0.284161	0.120761	0.0548794	0.283896	385	121	977	60	1010	809	767	17012711	SNORA33	AK096147 / NR_002436	NA	NA	NA
SLC20A1	0.13586	541	518	0	SLC20A1	FALSE	TRUE	TRUE	FALSE	TRUE	TRUE	FALSE	FALSE	FALSE	0	0.0429316	0.0121188	5.97359	0.0526997	0.016133	0.00604985	0.0116179	0.0255676	0.0487562	0.000573916	0.103998	0.505136	0.11573	0.28466	386	444	518	24	766	1195	970	16884523	SLC20A1	BC019944 / ENST00000272542 / ENST00000413135 / ENST00000456264 / ENST00000490674 / ENST00000498224 / NM_005415	phosphate-containing compound metabolic process / transport / ion transport / signal transduction / positive regulation of I-kappaB kinase/NF-kappaB cascade / transmembrane transport / sodium ion transport / phosphate ion transport	plasma membrane/integral to plasma membrane/membrane/integral to membrane	signal transducer activity/receptor activity/inorganic phosphate transmembrane transporter activity/high affinity inorganic phosphate:sodium symporter activity/sodium:phosphate symporter activity/symporter activity
OTTHUMG00000020273	0.135793	635	225	0	OTTHUMG00000020273	FALSE	TRUE	TRUE	FALSE	FALSE	TRUE	TRUE	TRUE	TRUE	0	0.0579641	0.01416	1.44658	0.0198899	0.0323637	0.0205776	0.0224846	0.00419989	0.896494	0.0452851	0.00585538	0.0113161	0.00421633	0.284937	387	158	1442	587	107	225	125	17087103	OTTHUMG00000020273 / RP11-49O14.2	ENST00000416455 / OTTHUMT00000053193	NA	NA	NA
SLC2A12	0.135697	471	545	0	SLC2A12	FALSE	TRUE	TRUE	FALSE	FALSE	TRUE	TRUE	FALSE	FALSE	0	0.0467557	0.0123302	5.68223	0.0369609	0.0206138	0.0090393	0.0132952	0.0159724	0.0600784	0.00369485	0.04467	0.238368	0.0681495	0.28533	388	326	545	87	573	963	830	17023799	SLC2A12	AL833602 / ENST00000275230 / NM_145176	carbohydrate transport / transmembrane transport / transport / glucose transport	plasma membrane/endomembrane system/integral to membrane/perinuclear region of cytoplasm/cytoplasm/membrane	substrate-specific transmembrane transporter activity/transporter activity/transmembrane transporter activity
RRAS	0.135659	770	623	4	RRAS	FALSE	TRUE	FALSE	FALSE	TRUE	FALSE	FALSE	TRUE	TRUE	0.18241	0.031386	0.00555658	6.55191	0.00487927	0.0199864	0.0159997	0.0157374	0.108343	0.0323567	0.655889	0.0501784	0.0366545	0.0316795	0.285483	389	1058	429	1321	623	528	536	16874339	RRAS	BC016318 / ENST00000246792 / ENST00000601532 / NM_006270	Ras protein signal transduction / synaptic transmission / axon guidance / negative regulation of cell migration / positive regulation of angiogenesis / GTP catabolic process / signal transduction / small GTPase mediated signal transduction / intracellular protein transport / nucleocytoplasmic transport / protein transport	plasma membrane/membrane/intracellular	GTPase activity/protein binding/GTP binding/GDP binding/nucleotide binding
LAMA3	0.135131	770	884	4	LAMA3	FALSE	FALSE	FALSE	FALSE	TRUE	FALSE	FALSE	TRUE	TRUE	0.18241	0.0279278	0.00476401	6.98645	0.00644862	0.013806	0.0210276	0.0186091	0.166288	0.0238853	0.504212	0.162866	0.0101197	0.0131499	0.287657	390	1174	373	1202	884	203	285	16851486	LAMA3	AY327115 / ENST00000269217 / ENST00000313654 / ENST00000399516 / ENST00000585600 / ENST00000586709 / ENST00000587184 / ENST00000588770 / NM_000227 / NM_001127717 / NM_001127718 / NM_198129	cell adhesion / epidermis development / regulation of cell adhesion / extracellular matrix organization / regulation of cell migration / hemidesmosome assembly / cell junction assembly / regulation of embryonic development / signal transduction / regulation of transcription, DNA-dependent	extracellular region/basement membrane/laminin-1 complex/laminin-5 complex/proteinaceous extracellular matrix	receptor binding/structural molecule activity/protein binding/sequence-specific DNA binding transcription factor activity/signal transducer activity
HAT1	0.134942	704	816	0	HAT1	FALSE	FALSE	FALSE	FALSE	TRUE	FALSE	FALSE	TRUE	TRUE	0	0.0260535	0.00204372	12.2162	0.013197	0.0135025	0.0151987	0.0147492	0.20886	0.000875475	0.145809	0.1727	0.0453227	0.0431263	0.28844	391	1223	115	816	898	607	673	16887635	HAT1	AF030424 / AK127840 / AK309001 / BC018682 / BC045673 / BC063003 / ENST00000264108 / ENST00000392584 / ENST00000412731 / ENST00000457761 / ENST00000477327 / ENST00000494601 / GENSCAN00000010006 / n408054 / NM_003642 / NR_027862 / OTTHUMT00000255377 / OTTHUMT00000334716 / OTTHUMT00000334717 / OTTHUMT00000334718 / OTTHUMT00000334720 / uc002uhi.3 / uc002uhj.3 / uc010fqi.2	DNA packaging / chromatin silencing at telomere / internal protein amino acid acetylation / response to nutrient / chromatin modification / histone acetylation	nucleus/nucleoplasm/nucleolus/cytoplasm/nuclear matrix/intracellular membrane-bounded organelle	histone acetyltransferase activity/protein binding/transferase activity/transferase activity, transferring acyl groups
MT2A	0.134738	634	633	0	MT2A	FALSE	TRUE	FALSE	FALSE	TRUE	FALSE	TRUE	FALSE	FALSE	0	0.0324735	0.006505	10.2972	0.0191667	0.02104	0.00917981	0.0119887	0.0945688	0.00273658	0.0511064	0.0412944	0.229637	0.102958	0.289286	392	1012	183	633	534	957	942	16819207	MT2A	BC007034 / ENST00000245185 / ENST00000562017 / NM_005953	cellular copper ion homeostasis / cytokine-mediated signaling pathway / cellular response to drug / cellular response to interleukin-3 / cellular response to erythropoietin / negative regulation of growth / interferon-gamma-mediated signaling pathway / cellular response to zinc ion	nucleus/cytoplasm/cytosol/perinuclear region of cytoplasm	protein binding/drug binding/zinc ion binding/metal ion binding
VCAN	0.134735	940	1146	21	VCAN	FALSE	FALSE	FALSE	FALSE	TRUE	FALSE	FALSE	TRUE	FALSE	0.350331	0.0185176	0.00584985	6.97586	0.00728297	0.00547611	0.0148554	0.0126611	0.487596	0.0240615	0.434561	0.719934	0.0496665	0.08326	0.289299	393	1398	374	1146	1361	638	892	16986913	VCAN	ENST00000265077 / ENST00000342785 / ENST00000343200 / ENST00000503923 / ENST00000505615 / ENST00000507162 / ENST00000512590 / ENST00000513016 / NM_001126336 / NM_001164097 / NM_001164098 / NM_004385 / U16306	carbohydrate metabolic process / cell adhesion / multicellular organismal development / heart development / cell recognition / glial cell migration / glycosaminoglycan metabolic process / chondroitin sulfate metabolic process / chondroitin sulfate biosynthetic process / chondroitin sulfate catabolic process / dermatan sulfate biosynthetic process / small molecule metabolic process / extracellular…	extracellular region/proteinaceous extracellular matrix/extracellular space/Golgi lumen/extracellular matrix/lysosomal lumen	calcium ion binding/glycosaminoglycan binding/hyaluronic acid binding/carbohydrate binding/protein binding
EVI2B	0.134688	574	514	0	EVI2B	FALSE	TRUE	TRUE	FALSE	FALSE	TRUE	TRUE	FALSE	TRUE	0	0.0470251	0.0112307	3.42937	0.0208064	0.0517672	0.00569802	0.0146352	0.0154557	0.303353	0.0389244	0.000351301	0.546881	0.0446952	0.289495	394	321	817	514	6	1236	692	16843162	EVI2B	AK297087 / ENST00000330927 / ENST00000544462 / ENST00000577894 / ENST00000578021 / ENST00000581884 / NM_006495	NA	cytoplasm/integral to plasma membrane/membrane/integral to membrane	NA
GSTA4	0.134529	701	591	2	GSTA4	FALSE	FALSE	FALSE	FALSE	FALSE	TRUE	FALSE	TRUE	TRUE	0.124514	0.0323817	0.0108033	4.98761	0.0199285	0.0148503	0.0257207	0.0234263	0.0956617	0.0992648	0.044995	0.133118	0.00328693	0.0032274	0.290154	395	1014	591	584	824	90	94	17020103	GSTA4	AF020918 / AF025887 / AF125271 / AF125272 / AF125273 / BC015523 / BC063439 / BC096817 / CR749474 / ENST00000370959 / ENST00000370960 / ENST00000370963 / ENST00000457564 / ENST00000477599 / ENST00000486559 / ENST00000541324 / GENSCAN00000045613 / NM_001512 / OTTHUMT00000040944 / OTTHUMT00000040945 / OTTHUMT00000040946 / OTTHUMT00000040947 / OTTHUMT00000040948 / OTTHUMT00000040949 / uc003pbd.3 / uc…	glutathione metabolic process / xenobiotic metabolic process / small molecule metabolic process / metabolic process / glutathione derivative biosynthetic process	cytosol/cytoplasm	glutathione transferase activity/protein homodimerization activity/transferase activity/protein binding
KIAA0922	0.134315	724	746	0	KIAA0922	FALSE	FALSE	FALSE	FALSE	TRUE	FALSE	FALSE	TRUE	TRUE	0	0.0235795	0.00167653	12.4241	0.00837022	0.0165121	0.0169326	0.016149	0.280065	0.000777403	0.356271	0.0967116	0.0286912	0.0278823	0.291047	396	1299	111	1088	746	450	491	16971588	KIAA0922	AK128028 / BC131505 / ENST00000240487 / ENST00000409663 / ENST00000409959 / ENST00000440693 / ENST00000445960 / ENST00000462540 / ENST00000478919 / ENST00000497247 / ENST00000509565 / GENSCAN00000040610 / NM_001131007 / NM_015196 / OTTHUMT00000330369 / OTTHUMT00000330370 / OTTHUMT00000330371 / OTTHUMT00000330372 / OTTHUMT00000330373 / OTTHUMT00000330374 / OTTHUMT00000334030 / OTTHUMT00000365199 /…	NA	integral to membrane/membrane	NA
METTL7B	0.134314	480	293	0	METTL7B	FALSE	TRUE	TRUE	FALSE	FALSE	TRUE	TRUE	FALSE	TRUE	0	0.0514517	0.0118596	3.3044	0.0252993	0.0310917	0.0147469	0.0183504	0.00905053	0.330557	0.0191013	0.00719943	0.051126	0.0142166	0.291051	397	236	850	293	124	642	301	16752185	METTL7B	AY358508 / ENST00000394252 / NM_152637	metabolic process / methylation	NA	methyltransferase activity/transferase activity
SAA1	0.134185	673	363	3	SAA1	FALSE	TRUE	TRUE	FALSE	FALSE	FALSE	TRUE	TRUE	TRUE	0.157119	0.045317	0.00617846	2.6803	0.00266948	0.0260365	0.0209619	0.0202833	0.0190506	0.496995	0.88094	0.0168907	0.0102857	0.00798631	0.291593	398	363	1027	1418	262	209	203	16722562	SAA1	BC105796 / ENST00000356524 / ENST00000405158 / ENST00000532858 / NM_000331 / NM_001178006 / NM_199161	acute-phase response / elevation of cytosolic calcium ion concentration / platelet activation / neutrophil chemotaxis / innate immune response / positive regulation of cell adhesion / macrophage chemotaxis / lymphocyte chemotaxis / regulation of protein secretion / positive regulation of cytokine secretion / positive regulation of interleukin-1 secretion / negative regulation of inflammatory resp…	extracellular region/high-density lipoprotein particle/endocytic vesicle lumen	G-protein coupled receptor binding
F8A3	0.134008	685	479	0	F8A3	FALSE	TRUE	TRUE	FALSE	FALSE	TRUE	FALSE	TRUE	TRUE	0	0.0725976	0.013302	1.8323	0.0216557	0.0117689	0.0165606	0.0161866	0.000818158	0.780925	0.0338947	0.241174	0.031625	0.0275596	0.292335	399	77	1340	462	971	479	485	17108585	F8A1 / F8A2 / F8A3 / MIR1184-1 / MIR1184-2 / MIR1184-3	ENST00000369445 / ENST00000369446 / ENST00000369505 / ENST00000408263 / ENST00000408606 / ENST00000408676 / ENST00000593571 / ENST00000596780 / ENST00000597478 / ENST00000598873 / ENST00000599403 / ENST00000601271 / hsa-mir-1184-1 / hsa-mir-1184-2 / hsa-mir-1184-3 / n409779 / n409780 / n409781 / n409979 / n409980 / n409981 / n409982 / n409983 / n409984 / NR_036049 / NR_036259 / NR_036260 / uc022c…	biological_process	nucleus	molecular_function
MIR1184-1	0.134008	685	479	0	MIR1184 1	FALSE	TRUE	TRUE	FALSE	FALSE	TRUE	FALSE	TRUE	TRUE	0	0.0725976	0.013302	1.8323	0.0216557	0.0117689	0.0165606	0.0161866	0.000818158	0.780925	0.0338947	0.241174	0.031625	0.0275596	0.292335	399	77	1340	462	971	479	485	17115763	MIR1184-1 / MIR1184-2 / MIR1184-3	hsa-mir-1184-1 / hsa-mir-1184-2 / hsa-mir-1184-3 / NR_036049 / NR_036259 / NR_036260	NA	NA	NA
MIR1184-1	0.134008	685	479	0	MIR1184 1	FALSE	TRUE	TRUE	FALSE	FALSE	TRUE	FALSE	TRUE	TRUE	0	0.0725976	0.013302	1.8323	0.0216557	0.0117689	0.0165606	0.0161866	0.000818158	0.780925	0.0338947	0.241174	0.031625	0.0275596	0.292335	399	77	1340	462	971	479	485	17115796	MIR1184-1 / MIR1184-2 / MIR1184-3	hsa-mir-1184-1 / hsa-mir-1184-2 / hsa-mir-1184-3 / NR_036049 / NR_036259 / NR_036260	NA	NA	NA
SNORA14A	0.133741	558	371	0	SNORA14A	FALSE	TRUE	TRUE	FALSE	FALSE	TRUE	TRUE	TRUE	TRUE	0	0.0558957	0.0132459	2.21335	0.0227137	0.0299367	0.0179083	0.0203135	0.00534568	0.65042	0.0286001	0.00870896	0.0222704	0.00791559	0.293456	402	175	1187	409	153	371	200	17047459	SNORA14A	NR_002955	NA	NA	NA
CA11	0.133668	731	840	0	CA11	FALSE	FALSE	FALSE	FALSE	TRUE	FALSE	FALSE	TRUE	TRUE	0	0.0235965	0.0136426	11.6973	0.0127161	0.00509843	0.0268268	0.0220295	0.27951	0.00118219	0.159218	0.75691	0.00254868	0.00480389	0.293763	403	1298	129	840	1384	74	139	16874012	CA11	AB018195 / ENST00000084798 / ENST00000599267 / NM_001217	NA	extracellular region/basolateral plasma membrane	carbonate dehydratase activity
CDH3	0.133379	658	767	1	CDH3	FALSE	TRUE	FALSE	FALSE	TRUE	FALSE	TRUE	FALSE	FALSE	0.0785596	0.0365463	0.00205959	9.3976	0.00811934	0.020727	0.00517012	0.0080087	0.056732	0.00480396	0.37311	0.0437458	0.612569	0.348294	0.294983	404	767	226	1105	566	1272	1300	16820483	CDH3	ENST00000569080 / OTTHUMT00000433755	cell adhesion / homophilic cell adhesion / visual perception / cell junction assembly / adherens junction organization / cell-cell junction organization / response to stimulus / cell-cell adhesion	plasma membrane/cell-cell adherens junction/integral to membrane/membrane	calcium ion binding/metal ion binding
ARL5B	0.133162	769	1073	0	ARL5B	FALSE	TRUE	FALSE	FALSE	TRUE	FALSE	FALSE	FALSE	FALSE	0	0.0309545	0.00430273	14.3396	0.0154317	0.00659511	0.00154311	0.00354249	0.114335	0.000270721	0.0974912	0.610615	0.98224	0.913631	0.295904	405	1073	66	740	1294	1467	1470	16702967	ARL5B	BC024163 / ENST00000377275 / NM_178815	small GTPase mediated signal transduction / intracellular protein transport / G-protein coupled receptor signaling pathway	intracellular/nucleus/cytoplasm	GTP binding/GTPase activity/signal transducer activity/guanyl nucleotide binding/G-protein beta/gamma-subunit complex binding/nucleotide binding
FERMT2	0.133054	662	1019	0	FERMT2	FALSE	TRUE	TRUE	FALSE	FALSE	TRUE	FALSE	FALSE	FALSE	0	0.0762578	0.00386341	2.70032	0.0323314	0.00748991	0.00452345	0.00733519	0.000553885	0.490883	0.00687016	0.527937	0.695994	0.420763	0.296361	406	68	1019	132	1235	1328	1355	16793067	FERMT2	AF443279 / AK291738 / BC017327 / BX161467 / CR749486 / ENST00000341590 / ENST00000343279 / ENST00000395631 / ENST00000399304 / ENST00000553373 / ENST00000553768 / ENST00000554152 / ENST00000554288 / ENST00000554712 / ENST00000555546 / ENST00000555692 / ENST00000557255 / EU979385 / GENSCAN00000005105 / NM_001134999 / NM_001135000 / NM_006832 / OTTHUMT00000276906 / OTTHUMT00000276907 / OTTHUMT00000…	cell-matrix adhesion / transforming growth factor beta receptor signaling pathway / integrin-mediated signaling pathway / regulation of cell shape / Wnt receptor signaling pathway / actin cytoskeleton organization / integrin activation / cell junction assembly / substrate adhesion-dependent cell spreading / focal adhesion assembly / protein localization to membrane / cell adhesion / integrin-m [W…	stress fiber/nucleus/nucleolus/cytoplasm/cytosol/focal adhesion/cell cortex/cell surface/extrinsic to internal side of plasma membrane/lamellipodium membrane/I band/filamentous actin/cytoskeleton/plasma membrane/membrane/cell junction/cell projection/nucleus [WARNING: THIS FIELD TRUNCATED]	phosphatidylinositol-3,4,5-trisphosphate binding/protein binding/phospholipid binding/lipid binding
MT1A	0.132799	709	726	1	MT1A	FALSE	FALSE	FALSE	FALSE	TRUE	FALSE	TRUE	FALSE	FALSE	0.0785596	0.027129	0.010504	8.52643	0.0158203	0.0318304	0.00680076	0.011724	0.183341	0.008438	0.0910068	0.00638292	0.422874	0.111924	0.297446	407	1196	271	726	118	1135	960	16819233	MT1A	BC029475 / ENST00000290705 / NM_005946	negative regulation of growth / cellular response to cadmium ion / cellular response to zinc ion	nucleus/cytoplasm/perinuclear region of cytoplasm	copper ion binding/zinc ion binding/cadmium ion binding/protein binding/metal ion binding
ULBP1	0.132692	717	668	3	ULBP1	FALSE	TRUE	FALSE	FALSE	TRUE	FALSE	FALSE	FALSE	TRUE	0.157119	0.0351796	0.014643	6.52761	0.00563719	0.0186125	0.0144966	0.0144443	0.0673499	0.0329147	0.579662	0.0648916	0.0546677	0.0474556	0.297905	408	852	432	1271	668	662	714	17013657	ULBP1	BC035416 / ENST00000229708 / ENST00000367345 / NM_025218	antigen processing and presentation / natural killer cell activation / natural killer cell mediated cytotoxicity / regulation of immune response / immune response	endoplasmic reticulum/plasma membrane/MHC class I protein complex/anchored to plasma membrane/membrane/anchored to membrane	natural killer cell lectin-like receptor binding/antigen binding/MHC class I receptor activity
CTSS	0.132663	659	653	1	CTSS	FALSE	TRUE	FALSE	FALSE	FALSE	FALSE	FALSE	TRUE	TRUE	0.0785596	0.0355525	0.00725718	5.79374	0.00762525	0.0193457	0.0267297	0.023907	0.0642698	0.0554551	0.408409	0.0565474	0.00260585	0.00281964	0.298029	409	829	528	1131	653	76	87	16692834	CTSS	ENST00000368985 / ENST00000448301 / ENST00000472977 / ENST00000480760 / ENST00000483930 / M90696 / NM_001199739 / NM_004079	toll-like receptor signaling pathway / adaptive immune response / antigen processing and presentation of peptide antigen via MHC class I / antigen processing and presentation of exogenous peptide antigen via MHC class I, TAP-independent / proteolysis / immune response / antigen processing and presentation / antigen processing and presentation of exogenous peptide antigen via MHC class II / antige…	extracellular region/lysosome/membrane/endolysosome lumen/lysosomal lumen/intracellular membrane-bounded organelle	cysteine-type endopeptidase activity/peptidase activity/cysteine-type peptidase activity/hydrolase activity
TNS4	0.13249	759	695	3	TNS4	FALSE	TRUE	FALSE	FALSE	FALSE	TRUE	FALSE	TRUE	TRUE	0.157119	0.0327702	0.00605101	4.10041	0.0206081	0.00797623	0.0296823	0.0253085	0.0911198	0.188725	0.0402125	0.485896	0.00134545	0.00191179	0.298766	410	991	695	529	1203	41	64	16844356	TNS4	AF370421 / ENST00000254051 / ENST00000394072 / ENST00000497303 / NM_032865	apoptotic process / protein localization	cytoplasm/cytoskeleton/focal adhesion/cell junction	actin binding/protein binding
RNPS1	0.132433	649	731	0	RNPS1	FALSE	TRUE	TRUE	FALSE	FALSE	TRUE	FALSE	FALSE	FALSE	0	0.0726253	0.0173033	2.31626	0.0216082	0.0118552	0.013094	0.013597	0.000815728	0.615205	0.0341563	0.237214	0.079748	0.061958	0.299011	411	76	1147	470	968	731	804	16815064	RNPS1	ENST00000320225 / ENST00000397086 / ENST00000454671 / ENST00000565678 / ENST00000566458	nuclear-transcribed mRNA catabolic process, nonsense-mediated decay / mRNA splicing, via spliceosome / transcription, DNA-dependent / transcription from RNA polymerase II promoter / termination of RNA polymerase II transcription / mRNA export from nucleus / RNA splicing / gene expression / RNA metabolic process / mRNA metabolic process / mRNA 3'-end processing / mRNA processing / positive regulat…	nucleus/nucleoplasm/cytoplasm/cytosol/nuclear speck/exon-exon junction complex	nucleotide binding/RNA binding/mRNA 3'-UTR binding/protein binding/nucleic acid binding/mRNA binding
SPOCD1	0.132309	611	624	0	SPOCD1	FALSE	FALSE	FALSE	FALSE	TRUE	TRUE	FALSE	FALSE	TRUE	0	0.031829	0.00506153	8.90608	0.0267029	0.0199847	0.0126395	0.0150357	0.10251	0.00658642	0.0154429	0.0501944	0.0901875	0.0394277	0.299542	412	1037	257	242	624	754	632	16684581	SPOCD1	AK095829 / AK096192 / AK097227 / AK131447 / BC007910 / BC029069 / BC069257 / BC114430 / ENST00000257100 / ENST00000360482 / ENST00000373648 / ENST00000452755 / ENST00000460061 / ENST00000468720 / ENST00000473361 / ENST00000485944 / ENST00000525930 / ENST00000528579 / ENST00000528791 / ENST00000529396 / ENST00000531039 / ENST00000532604 / ENST00000533231 / GENSCAN00000019439 / NM_144569 / OTTHUMT0…	transcription, DNA-dependent / negative regulation of phosphatase activity	nucleus	zinc ion binding
RND3	0.132265	569	585	1	RND3	FALSE	TRUE	TRUE	FALSE	FALSE	TRUE	FALSE	FALSE	FALSE	0.0785596	0.0598696	0.00377545	5.05777	0.0219751	0.0101983	0.00275705	0.00559876	0.00337036	0.0943388	0.0321914	0.324887	0.903653	0.649069	0.299733	413	142	585	444	1046	1448	1450	16903491	RND3	AF498969 / AK298007 / AK299731 / AK309442 / BC012513 / BT006769 / CR542038 / CR542070 / ENST00000263895 / ENST00000375734 / ENST00000409557 / ENST00000439275 / ENST00000454202 / ENST00000466334 / ENST00000472416 / ENST00000473639 / ENST00000497865 / GENSCAN00000041437 / NM_001254738 / NM_005168 / OTTHUMT00000254808 / OTTHUMT00000254809 / OTTHUMT00000332342 / OTTHUMT00000332343 / OTTHUMT0000033234…	GTP catabolic process / cell adhesion / small GTPase mediated signal transduction / actin cytoskeleton organization / signal transduction / protein transport	Golgi membrane/intracellular/Golgi apparatus/membrane	GTPase activity/GTP binding/nucleotide binding
NR1D1	0.132223	487	510	0	NR1D1	FALSE	TRUE	TRUE	FALSE	TRUE	FALSE	TRUE	FALSE	FALSE	0	0.043819	0.00375113	8.5392	0.0121043	0.0213185	0.0089479	0.0112727	0.0229103	0.00836752	0.178179	0.0392349	0.244212	0.129007	0.299912	414	407	270	867	510	972	1008	16844294	NR1D1 / THRA	ENST00000246672 / M24898 / M24900 / NM_021724	negative regulation of transcription from RNA polymerase II promoter / transcription initiation from RNA polymerase II promoter / circadian rhythm / gene expression / negative regulation of receptor biosynthetic process / intracellular receptor signaling pathway / negative regulation of toll-like receptor 4 signaling pathway / cellular response to lipopolysaccharide / positive regulation of chole…	nuclear chromatin/nucleus/nucleoplasm/cytosol/cytoplasm	steroid hormone receptor activity/transcription corepressor activity/ligand-activated sequence-specific DNA binding RNA polymerase II transcription factor activity/zinc ion binding/sequence-specific DNA binding/transcription regulatory region DNA binding/DNA binding/sequence-specific DNA binding transcription factor activity/metal ion binding/thyroid hormone receptor activity/steroid receptor RNA…
CMTM3	0.132048	569	599	1	CMTM3	FALSE	TRUE	TRUE	FALSE	TRUE	FALSE	TRUE	FALSE	TRUE	0.0785596	0.0396025	0.00342833	6.28185	0.0131943	0.0232755	0.0131028	0.0148059	0.0386881	0.0391532	0.14588	0.0275082	0.0795579	0.0423676	0.300667	415	599	463	817	387	730	664	16819856	CMTM3	AF479813 / BC023509 / BC023591 / BC036042 / BC040227 / BC047701 / ENST00000360086 / ENST00000361909 / ENST00000424011 / ENST00000460097 / ENST00000562357 / ENST00000562707 / ENST00000563672 / ENST00000564060 / ENST00000564247 / ENST00000565003 / ENST00000565666 / ENST00000565922 / ENST00000566121 / ENST00000566756 / ENST00000567572 / ENST00000568477 / GENSCAN00000036282 / n410469 / n410473 / NM_1…	chemotaxis	extracellular space/integral to membrane/membrane	cytokine activity
DCAKD	0.131787	687	1101	0	DCAKD	FALSE	TRUE	FALSE	FALSE	TRUE	TRUE	FALSE	FALSE	FALSE	0	0.0301992	0.0023277	11.8593	0.0268656	0.00896651	0.00662252	0.0087001	0.125606	0.00107573	0.0150715	0.407698	0.441495	0.284607	0.301793	416	1101	122	235	1129	1152	1242	16845817	DCAKD	BC006546 / ENST00000310604 / ENST00000342350 / ENST00000452796 / ENST00000588295 / ENST00000588499 / ENST00000592902 / ENST00000593094 / NM_001128631 / NM_024819	coenzyme A biosynthetic process	mitochondrion	dephospho-CoA kinase activity/ATP binding/nucleotide binding
CDCA7	0.131507	776	1208	1	CDCA7	FALSE	FALSE	FALSE	FALSE	TRUE	FALSE	FALSE	TRUE	TRUE	0.0785596	0.0253647	0.00738615	10.473	0.00417946	0.00785777	0.0228535	0.018798	0.226861	0.00245692	0.729251	0.495926	0.0064761	0.0124234	0.303005	417	1247	175	1354	1208	156	276	16887840	CDCA7	AK075134 / ENST00000306721 / ENST00000347703 / ENST00000392567 / ENST00000435616 / ENST00000467411 / ENST00000468359 / ENST00000496441 / NM_031942 / NM_145810	transcription, DNA-dependent / regulation of transcription, DNA-dependent / regulation of cell proliferation / cell division	nucleus	NA
LOC145474	0.131337	605	187	0	LOC145474	FALSE	TRUE	TRUE	FALSE	FALSE	TRUE	TRUE	FALSE	TRUE	0	0.0546582	0.00870062	2.16578	0.0351325	0.0341247	0.00787871	0.0145242	0.00618293	0.666829	0.00469888	0.00442089	0.32283	0.04628	0.303743	418	187	1215	104	80	1052	702	16786060	LOC145474	NR_027046	NA	NA	NA
CENPK	0.131284	739	1122	0	CENPK	FALSE	FALSE	FALSE	FALSE	TRUE	FALSE	FALSE	TRUE	TRUE	0	0.0258269	0.00257737	12.6978	0.00764344	0.00903697	0.0177017	0.0154194	0.214636	0.000665737	0.407058	0.402528	0.023492	0.0349765	0.303973	419	1233	106	1129	1122	385	581	16996722	CENPK	AF315941 / AY009151 / AY033646 / BC005400 / BC008504 / ENST00000242872 / ENST00000396679 / ENST00000502997 / ENST00000504508 / ENST00000505960 / ENST00000506282 / ENST00000508311 / ENST00000508421 / ENST00000509397 / ENST00000510354 / ENST00000510693 / ENST00000510768 / ENST00000513951 / ENST00000514814 / ENST00000515497 / ENST00000515873 / GENSCAN00000021663 / NM_001267038 / NM_022145 / OTTHUMT0…	mitotic cell cycle / nucleosome assembly / CENP-A containing nucleosome assembly at centromere / positive regulation of transcription from RNA polymerase II promoter / M phase of mitotic cell cycle / mitotic prometaphase	condensed chromosome kinetochore/nucleoplasm/cytosol/chromosome, centromeric region/kinetochore/nucleus/chromosome	protein binding
POLA1	0.131043	580	878	0	POLA1	FALSE	TRUE	TRUE	FALSE	TRUE	FALSE	FALSE	FALSE	FALSE	0	0.0389429	0.00497172	10.7779	0.0114046	0.0139289	0.00769794	0.00904533	0.0420134	0.00204139	0.202785	0.159043	0.338103	0.256711	0.305026	420	625	164	907	878	1064	1206	17102230	POLA1	BX648513 / ENST00000379059 / ENST00000379068 / ENST00000480125 / ENST00000493342 / ENST00000494204 / GENSCAN00000004172 / GENSCAN00000004178 / NM_016937 / OTTHUMT00000056111 / OTTHUMT00000056112 / OTTHUMT00000056113 / OTTHUMT00000056114 / OTTHUMT00000056115 / uc004dbl.3 / uc004dbm.3	G1/S transition of mitotic cell cycle / regulation of transcription involved in G1/S phase of mitotic cell cycle / S phase of mitotic cell cycle / mitotic cell cycle / telomere maintenance via recombination / telomere maintenance / DNA synthesis involved in DNA repair / DNA replication / DNA replication, synthesis of RNA primer / DNA replication initiation / DNA strand elongation involved in DNA …	chromatin/nucleus/nuclear envelope/nucleoplasm/alpha DNA polymerase:primase complex/nucleolus/cytoplasm/nuclear matrix/intracellular membrane-bounded organelle	nucleotide binding/nucleoside binding/DNA binding/chromatin binding/DNA-directed DNA polymerase activity/DNA primase activity/protein binding/3'-5' exonuclease activity/metal ion binding/protein heterodimerization activity/4 iron, 4 sulfur cluster binding/nucleic acid binding/transferase activity/nucleotidyltransferase activity/iron-sulfur cluster binding/double-stranded DNA binding/purine nucleo…
HIST1H2BM	0.13088	469	492	0	HIST1H2BM	FALSE	TRUE	TRUE	FALSE	FALSE	TRUE	FALSE	TRUE	TRUE	0	0.0448158	0.00944895	5.74477	0.0211223	0.0155286	0.0215439	0.0205062	0.0202612	0.0574384	0.0369643	0.116807	0.00890944	0.0074795	0.305739	421	381	535	492	795	190	191	17005865	HIST1H2BM	BC066244 / ENST00000359465 / NM_003521	nucleosome assembly	nucleosome/nucleus/chromosome/intracellular	DNA binding/protein heterodimerization activity/sequence-specific DNA binding
FGFR1OP2	0.130734	637	422	2	FGFR1OP2	FALSE	TRUE	TRUE	FALSE	FALSE	TRUE	TRUE	TRUE	TRUE	0.124514	0.0435096	0.0102187	2.52454	0.0233144	0.0234771	0.0163844	0.0181441	0.0238028	0.54605	0.0260027	0.0265316	0.0331219	0.0151322	0.306377	422	422	1074	371	378	500	315	16749365	FGFR1OP2	BC032143 / ENST00000229395 / ENST00000327214 / ENST00000546072 / NM_001171887 / NM_001171888 / NM_015633	wound healing / response to wounding	cytosol/cytoplasm	protein homodimerization activity/nucleotide binding
PTPN21	0.130611	730	652	5	PTPN21	FALSE	TRUE	FALSE	FALSE	FALSE	FALSE	FALSE	TRUE	TRUE	0.203074	0.0357043	0.00435008	4.50149	0.0184229	0.0114106	0.0159072	0.0153674	0.0630561	0.141258	0.0579563	0.258279	0.0375606	0.0355477	0.306916	423	820	644	652	990	540	586	16795582	PTPN21	AK310480 / BC143846 / BC143847 / ENST00000328736 / ENST00000536337 / ENST00000554270 / ENST00000554628 / ENST00000555243 / ENST00000556564 / ENST00000557249 / GENSCAN00000007110 / NM_007039 / OTTHUMT00000410303 / OTTHUMT00000410305 / OTTHUMT00000410306 / OTTHUMT00000410307 / OTTHUMT00000410308 / OTTHUMT00000410309 / uc001xwv.4 / uc010atf.1 / uc010twc.2	protein dephosphorylation / peptidyl-tyrosine dephosphorylation / dephosphorylation	cytoplasm/cytoskeleton	protein tyrosine phosphatase activity/phosphoprotein phosphatase activity/protein binding/hydrolase activity/phosphatase activity
MIR591	0.13058	642	564	0	MIR591	FALSE	TRUE	TRUE	FALSE	FALSE	TRUE	TRUE	TRUE	TRUE	0	0.0586975	0.0115515	1.80813	0.0201542	0.0319196	0.0154264	0.0185692	0.0038579	0.788912	0.0433411	0.00629118	0.0426616	0.0133085	0.307055	424	153	1349	564	117	587	287	17059999	MIR591	hsa-mir-591 / NR_030322	NA	NA	NA
AIM2	0.130561	583	349	0	AIM2	FALSE	FALSE	FALSE	FALSE	TRUE	TRUE	TRUE	TRUE	TRUE	0	0.030837	0.00853606	7.62628	0.0236537	0.0225609	0.0195457	0.0203906	0.116022	0.0153956	0.0246512	0.0312886	0.0146599	0.00773809	0.307138	425	1078	323	349	430	264	194	16695121	AIM2	BC010940 / ENST00000368129 / ENST00000368130 / ENST00000481829 / NM_004833	activation of innate immune response / positive regulation of defense response to virus by host / apoptotic process / inflammatory response / immune response / negative regulation of NF-kappaB transcription factor activity / positive regulation of protein oligomerization / positive regulation of interleukin-1 beta production / tumor necrosis factor-mediated signaling pathway / cellular response t…	nucleus/nucleolus/cytoplasm/mitochondrion/cytosol/AIM2 inflammasome complex/cytoplasmic part	double-stranded DNA binding/protein binding/identical protein binding/DNA binding
HSPA1B	0.130321	801	1085	2	HSPA1B	FALSE	TRUE	FALSE	FALSE	TRUE	FALSE	FALSE	FALSE	FALSE	0.124514	0.0306361	0.00113361	10.7643	0.00781478	0.00976367	0.00527449	0.00623438	0.118962	0.00205829	0.394529	0.352293	0.599343	0.560062	0.308194	426	1085	167	1121	1073	1263	1431	17006881	HSPA1A / HSPA1B	AK295398 / AK298078 / AK303967 / AK304618 / AK304652 / AL360193 / BC009322 / BC018740 / BC057397 / BC063507 / ENST00000375650 / ENST00000391548 / ENST00000391555 / ENST00000445736 / ENST00000450744 / ENST00000458062 / ENST00000545241 / ENST00000547145 / ENST00000548079 / ENST00000549607 / ENST00000550810 / GENSCAN00000002855 / GENSCAN00000002881 / NM_005346 / OTTHUMT00000035305 / OTTHUMT000000764…	mRNA catabolic process / response to unfolded protein / negative regulation of cell proliferation / gene expression / RNA metabolic process / mRNA metabolic process / negative regulation of cell growth / protein refolding / negative regulation of apoptotic process / positive regulation of erythrocyte differentiation / negative regulation of inclusion body assembly / cell morphogenesis / response …	nucleus/cytoplasm/mitochondrion/endoplasmic reticulum/cytosol/signalosome/inclusion body/aggresome/nuclear speck/ribonucleoprotein complex/perinuclear region of cytoplasm	protein binding/ATP binding/ubiquitin protein ligase binding/protein binding involved in protein folding/protein N-terminus binding/unfolded protein binding/nucleotide binding/viral receptor activity
OTTHUMG00000159050	0.130104	477	664	0	OTTHUMG00000159050	FALSE	TRUE	TRUE	FALSE	FALSE	TRUE	FALSE	FALSE	TRUE	0	0.0518962	0.0100472	4.35134	0.0341344	0.0172313	0.0121083	0.0147976	0.0085819	0.157483	0.00537109	0.0843004	0.104163	0.0424776	0.309152	427	226	664	117	722	781	665	16947955	OTTHUMG00000159050 / RP11-185E8.1	ENST00000467896 / n366015 / OTTHUMT00000353026 / TCONS_00005658-XLOC_002921	NA	NA	NA
PSAT1	0.129745	508	545	0	PSAT1	FALSE	TRUE	TRUE	FALSE	FALSE	FALSE	TRUE	TRUE	TRUE	0	0.0435658	0.00782821	4.83207	0.0116269	0.0209424	0.0285965	0.0259067	0.0236382	0.11113	0.194608	0.0420427	0.00171034	0.00162342	0.310745	428	420	610	892	545	49	56	17086193	PSAT1	BC004863 / ENST00000347159 / ENST00000376588 / NM_021154 / NM_058179 / TCONS_l2_00001295-XLOC_l2_000961	L-serine biosynthetic process / pyridoxine biosynthetic process / cellular amino acid biosynthetic process / cellular nitrogen compound metabolic process / small molecule metabolic process / metabolic process	cytosol	O-phospho-L-serine:2-oxoglutarate aminotransferase activity/pyridoxal phosphate binding/catalytic activity/transaminase activity/transferase activity
ATAD5	0.129408	826	1256	0	ATAD5	FALSE	FALSE	FALSE	FALSE	TRUE	FALSE	FALSE	TRUE	TRUE	0	0.0125661	0.00563503	15.5088	0.00218442	0.00720275	0.0206165	0.0168449	0.803405	0.000146906	0.921294	0.553782	0.0112069	0.0224945	0.312243	429	1459	46	1440	1256	221	416	16832852	ATAD5	AY557611 / ENST00000321990 / ENST00000578295 / ENST00000585133 / NM_024857	response to DNA damage stimulus	nucleus	ATP binding/nucleoside-triphosphatase activity/nucleotide binding
SPDL1	0.129065	786	1072	0	SPDL1	FALSE	FALSE	FALSE	FALSE	TRUE	FALSE	FALSE	TRUE	TRUE	0	0.0234429	0.00653267	13.5068	0.00279769	0.00977198	0.0170684	0.0146631	0.284545	0.000424611	0.869278	0.351752	0.027692	0.0443065	0.313777	430	1302	83	1411	1072	439	685	16992096	SPDL1	AF269167 / AK074227 / AK304623 / AK308835 / AK310442 / BC012568 / ENST00000265295 / ENST00000503871 / ENST00000505977 / ENST00000506574 / ENST00000507232 / ENST00000508247 / ENST00000508837 / ENST00000509785 / ENST00000510751 / ENST00000512028 / ENST00000513795 / ENST00000513941 / ENST00000515224 / GENSCAN00000022486 / NM_017785 / OTTHUMT00000252829 / OTTHUMT00000371619 / OTTHUMT00000371620 / OTT…	establishment of mitotic spindle orientation / mitotic cell cycle / mitotic metaphase plate congression / protein localization to kinetochore / cell division / cell cycle / mitosis / M phase of mitotic cell cycle / mitotic prometaphase	spindle pole/condensed chromosome outer kinetochore/nucleus/microtubule organizing center/cytosol/chromosome, centromeric region/kinetochore/condensed chromosome kinetochore/chromosome/cytoplasm/cytoskeleton	protein binding/kinetochore binding
OTTHUMG00000158412	0.129034	491	613	0	OTTHUMG00000158412	FALSE	TRUE	TRUE	FALSE	FALSE	FALSE	TRUE	FALSE	FALSE	0	0.0575786	0.00407098	4.81306	0.0129687	0.0246842	0.00940199	0.0122463	0.0043922	0.112674	0.15202	0.0214063	0.216435	0.0949191	0.313916	431	163	613	828	327	938	921	16742148	OTTHUMG00000158412 / RP11-864N7.2	ENST00000428553 / GENSCAN00000029993 / OTTHUMT00000350948	NA	NA	NA
DAPP1	0.12896	618	548	2	DAPP1	FALSE	TRUE	TRUE	FALSE	FALSE	TRUE	FALSE	FALSE	FALSE	0.124514	0.0407034	0.00645521	5.70569	0.0307537	0.00982868	0.00760993	0.00990837	0.0337224	0.0590738	0.00856501	0.348071	0.345756	0.197357	0.314248	432	548	543	155	1066	1071	1118	16969229	DAPP1	AF186022 / ENST00000507994 / ENST00000512369 / ENST00000514301 / NM_014395	protein dephosphorylation / signal transduction / peptidyl-tyrosine dephosphorylation	cytosol/plasma membrane/cytoplasm/membrane	protein tyrosine phosphatase activity/phospholipid binding/phosphatidylinositol-3,4,5-trisphosphate binding/phosphatidylinositol-3,4-bisphosphate binding/protein binding
PPARG	0.128867	560	328	1	PPARG	FALSE	TRUE	TRUE	FALSE	FALSE	TRUE	TRUE	FALSE	FALSE	0.0785596	0.046735	0.0122384	3.5757	0.0330439	0.0250821	0.00546484	0.0110326	0.0160129	0.273993	0.0062288	0.0199573	0.575502	0.139104	0.314666	433	328	790	127	312	1251	1026	16937741	PPARG	AB307692 / AB451337 / AB472042 / AB565476 / AJ563370 / AK290581 / BC006811 / BT007281 / D83233 / DQ356894 / ENST00000287820 / ENST00000309576 / ENST00000396999 / ENST00000397000 / ENST00000397010 / ENST00000397012 / ENST00000397015 / ENST00000397023 / ENST00000397026 / ENST00000397029 / ENST00000438682 / ENST00000455517 / ENST00000477039 / ENST00000497594 / ENST00000539812 / GENSCAN00000025129 / …	negative regulation of transcription from RNA polymerase II promoter / placenta development / negative regulation of acute inflammatory response / transcription initiation from RNA polymerase II promoter / lipid metabolic process / activation of cysteine-type endopeptidase activity involved in apoptotic process / signal transduction / heart development / response to nutrient / regulation of blood…	nucleus/nucleoplasm/cytosol/cytoplasm	RNA polymerase II regulatory region DNA binding/DNA binding/chromatin binding/sequence-specific DNA binding transcription factor activity/steroid hormone receptor activity/ligand-activated sequence-specific DNA binding RNA polymerase II transcription factor activity/prostaglandin receptor activity/protein binding/drug binding/zinc ion binding/enzyme binding/ligand-dependent nuclear receptor trans…
CD58	0.128783	704	716	6	CD58	FALSE	TRUE	TRUE	FALSE	FALSE	TRUE	FALSE	FALSE	FALSE	0.220545	0.0443947	0.00581533	3.26621	0.0222647	0.0173797	0.00304479	0.0070356	0.0213398	0.339273	0.0307273	0.0819532	0.875221	0.456272	0.315046	434	389	861	433	716	1436	1373	16691403	CD58	AK291980 / ENST00000369489 / ENST00000457047 / ENST00000464088 / NM_001144822 / NM_001779 / NR_026665	cell adhesion / blood coagulation / cell-cell adhesion / leukocyte migration	plasma membrane/integral to plasma membrane/anchored to membrane/membrane/integral to membrane	protein binding
MAGOH	0.128438	494	360	0	MAGOH	FALSE	TRUE	TRUE	FALSE	FALSE	FALSE	TRUE	TRUE	TRUE	0	0.055345	0.0112028	3.41473	0.014035	0.0239718	0.0190301	0.0194374	0.00570266	0.306437	0.125219	0.0242886	0.016707	0.0102606	0.316602	435	181	821	783	360	300	243	16687342	MAGOH	AF067173 / ENST00000371466 / ENST00000371470 / ENST00000462941 / ENST00000495868 / NM_002370	nuclear-transcribed mRNA catabolic process, nonsense-mediated decay / mRNA splicing, via spliceosome / transcription from RNA polymerase II promoter / termination of RNA polymerase II transcription / mRNA export from nucleus / regulation of translation / RNA splicing / gene expression / RNA metabolic process / mRNA metabolic process / mRNA 3'-end processing / mRNA processing / transport / mRNA tr…	nucleus/nucleoplasm/cytosol/nuclear speck/exon-exon junction complex/catalytic step 2 spliceosome/spliceosomal complex/cytoplasm	RNA binding/protein binding
MIR891A	0.128328	482	549	0	MIR891A	FALSE	TRUE	TRUE	FALSE	FALSE	TRUE	TRUE	FALSE	FALSE	0	0.0516174	0.00603603	5.60027	0.0277022	0.0200687	0.00631745	0.0103914	0.00887279	0.063728	0.0133097	0.0494164	0.474694	0.169949	0.317098	436	231	549	217	610	1170	1079	17114774	MIR891A	hsa-mir-891a / NR_030581	NA	NA	NA
BNIPL	0.128174	689	733	0	BNIPL	FALSE	FALSE	FALSE	FALSE	TRUE	FALSE	FALSE	TRUE	TRUE	0	0.0293536	0.00891129	10.775	0.0107655	0.0168352	0.0148638	0.0148508	0.139496	0.00204496	0.228331	0.0909176	0.049555	0.0417754	0.317799	437	1131	166	941	733	636	659	16670710	BNIPL	AF193056 / ENST00000295294 / ENST00000368931 / ENST00000392802 / ENST00000485855 / ENST00000491386 / NM_001159642 / NM_138278	induction of apoptosis / negative regulation of cell proliferation / regulation of growth rate / phosphatidylserine exposure on apoptotic cell surface / execution phase of apoptosis / apoptotic process	nucleus/cytosol	protein binding/identical protein binding
TOMM40	0.128095	651	986	1	TOMM40	FALSE	TRUE	TRUE	FALSE	TRUE	FALSE	FALSE	FALSE	FALSE	0.0785596	0.0391924	0.00562675	9.84207	0.010109	0.00592364	0.00755508	0.007496	0.0407227	0.00362927	0.257992	0.675859	0.350598	0.402522	0.318155	438	615	206	986	1335	1075	1341	16863104	AC093724.2 / OTTHUMG00000153715 / TOMM40	AF043250 / AF316399 / AF316402 / BC001779 / BC006413 / BC012134 / BC017224 / BC047528 / ENST00000252487 / ENST00000405636 / ENST00000426677 / ENST00000448659 / ENST00000589649 / ENST00000592041 / ENST00000592434 / GENSCAN00000000713 / n333102 / NM_001128916 / NM_001128917 / NM_006114 / OTTHUMT00000332212 / OTTHUMT00000453239 / OTTHUMT00000453240 / OTTHUMT00000453241 / OTTHUMT00000453242 / OTTHUMT…	protein targeting to mitochondrion / ion transport / cellular protein metabolic process / transport / protein transport / transmembrane transport / anion transport / regulation of anion transport	mitochondrion/mitochondrial outer membrane translocase complex/integral to membrane/integral to mitochondrial outer membrane/pore complex/membrane/mitochondrial outer membrane/integral to mitochondrial membrane	protein transmembrane transporter activity/porin activity/voltage-gated anion channel activity
HIST1H3H	0.127994	492	725	0	HIST1H3H	FALSE	TRUE	TRUE	FALSE	TRUE	FALSE	FALSE	FALSE	FALSE	0	0.049175	0.005134	7.87981	0.0112434	0.0171729	0.00827988	0.010009	0.011903	0.0129712	0.208941	0.0852443	0.291035	0.191326	0.318617	439	275	311	921	725	1022	1112	17005862	HIST1H3A / HIST1H3B / HIST1H3C / HIST1H3D / HIST1H3E / HIST1H3F / HIST1H3G / HIST1H3H / HIST1H3I / HIST1H3J	BC007518 / BC062305 / ENST00000369163 / NM_003536	nucleosome assembly / blood coagulation / S phase / regulation of gene silencing	nucleosome/extracellular region/nucleus/nucleoplasm/chromosome	DNA binding/protein binding/protein heterodimerization activity
GLUL	0.127841	735	915	1	GLUL	FALSE	FALSE	FALSE	FALSE	TRUE	FALSE	FALSE	TRUE	TRUE	0.0785596	0.0258893	0.00359138	9.45951	0.00936085	0.0131968	0.0188048	0.0170832	0.213032	0.00461864	0.296531	0.183208	0.0176936	0.0209078	0.319311	440	1230	223	1026	915	314	395	16696979	GLUL	AK092874 / AK301600 / AL161952 / AY486122 / AY513283 / AY947343 / BC010037 / BC011700 / BC011852 / BC018992 / BC031964 / BC051726 / BC127883 / BX537384 / ENST00000311223 / ENST00000331872 / ENST00000339526 / ENST00000417584 / ENST00000461447 / ENST00000462444 / ENST00000475808 / ENST00000480604 / ENST00000484996 / ENST00000489818 / ENST00000491322 / GENSCAN00000014117 / NM_001033044 / NM_00103305…	neurotransmitter uptake / glutamate catabolic process / glutamine biosynthetic process / synaptic transmission / cell proliferation / cellular amino acid biosynthetic process / response to glucose stimulus / positive regulation of insulin secretion / cellular nitrogen compound metabolic process / small molecule metabolic process / positive regulation of epithelial cell proliferation / protein hom…	mitochondrion/rough endoplasmic reticulum/cytosol/perikaryon/protein complex/axon terminus/intracellular/cytoplasm/cell projection/neuron projection/intracellular membrane-bounded organelle	magnesium ion binding/glutamate decarboxylase activity/glutamate-ammonia ligase activity/ATP binding/glutamate binding/manganese ion binding/identical protein binding/dynein light chain binding/nucleotide binding/catalytic activity/lyase activity/ligase activity/protein binding/magnesium ion bi [WARNING: THIS FIELD TRUNCATED]
LOC101060654	0.127806	649	384	0	LOC101060654	FALSE	TRUE	TRUE	FALSE	FALSE	FALSE	TRUE	TRUE	TRUE	0	0.0627578	0.0113617	1.83891	0.0125423	0.0232967	0.0205412	0.0203339	0.0024243	0.77873	0.16438	0.0274037	0.0114192	0.00786821	0.319474	441	123	1338	845	384	227	198	17065860	LOC101060654	XM_003960427	NA	NA	NA
ASS1	0.127322	685	881	1	ASS1	FALSE	TRUE	FALSE	FALSE	TRUE	FALSE	FALSE	FALSE	FALSE	0.0785596	0.0359033	0.00378789	9.76777	0.0118726	0.0127208	0.00487804	0.00676804	0.0615005	0.00380222	0.185966	0.200834	0.650031	0.48959	0.321685	442	807	209	881	934	1299	1390	17090296	ASS1	AK027126 / AK293114 / AK304625 / BC008754 / BC009243 / BC012763 / BC021676 / BC052288 / ENST00000352480 / ENST00000372386 / ENST00000372393 / ENST00000372394 / ENST00000422569 / ENST00000443588 / ENST00000467695 / ENST00000470849 / ENST00000492400 / ENST00000493984 / GENSCAN00000034568 / NM_000050 / NM_054012 / OTTHUMT00000054649 / OTTHUMT00000054650 / OTTHUMT00000054651 / OTTHUMT00000054652 / OT…	urea cycle / arginine biosynthetic process / cellular nitrogen compound metabolic process / small molecule metabolic process / cellular amino acid biosynthetic process / asparagine biosynthetic process / argininosuccinate metabolic process / response to acid / kidney development / liver development / acute-phase response / midgut development / aging / response to nutrient / response to drug / res…	cytoplasm/cytosol/lysosome/endoplasmic reticulum/nucleus/mitochondrial outer membrane/neuron projection/neuronal cell body/perikaryon/cell body fiber	argininosuccinate synthase activity/protein binding/ATP binding/nucleotide binding/ligase activity/asparagine synthase (glutamine-hydrolyzing) activity/toxic substance binding
SPC25	0.12722	749	1003	0	SPC25	FALSE	FALSE	FALSE	FALSE	TRUE	FALSE	TRUE	FALSE	FALSE	0	0.0233798	0.00815146	12.2986	0.00666111	0.0252719	0.00852266	0.0111591	0.286637	0.000835095	0.485685	0.019303	0.273158	0.133694	0.322156	443	1303	113	1187	304	1003	1015	16904780	SPC25	AF225416 / AK291093 / AY456388 / BC022255 / CR457197 / ENST00000282074 / ENST00000451987 / ENST00000472216 / ENST00000479309 / ENST00000572735 / ENST00000572874 / ENST00000573221 / ENST00000576123 / GENSCAN00000030877 / GENSCAN00000050739 / NM_020675 / OTTHUMT00000255233 / OTTHUMT00000333415 / OTTHUMT00000333589 / OTTHUMT00000333590 / OTTHUMT00000429518 / OTTHUMT00000429519 / OTTHUMT00000429520 /…	mitotic cell cycle / mitotic spindle organization / chromosome segregation / mitosis / cell division / cell cycle / M phase of mitotic cell cycle / mitotic prometaphase	condensed chromosome kinetochore/nucleus/cytosol/Ndc80 complex/chromosome, centromeric region/kinetochore/chromosome	protein binding
SFN	0.127071	964	1046	9	SFN	FALSE	FALSE	FALSE	FALSE	FALSE	FALSE	TRUE	TRUE	TRUE	0.260969	0.022774	0.0075271	2.4162	0.00906016	0.0330839	0.0205117	0.0216528	0.30737	0.581593	0.313566	0.00521599	0.0115035	0.00535511	0.322841	444	1315	1120	1046	94	229	146	16661314	SFN	AF029082 / ENST00000339276 / NM_006142	regulation of cyclin-dependent protein serine/threonine kinase activity / release of cytochrome c from mitochondria / negative regulation of protein kinase activity / apoptotic process / signal transduction / negative regulation of cell proliferation / intrinsic apoptotic signaling pathway in response to DNA damage / cellular membrane organization / keratinocyte differentiation / positive regulat…	extracellular space/nucleus/cytoplasm/cytosol/cytoplasmic vesicle membrane/extracellular region	protein binding/protein kinase C inhibitor activity/protein kinase binding/protein domain specific binding/phosphoprotein binding
HIST1H2BC	0.127057	551	744	0	HIST1H2BC	FALSE	TRUE	TRUE	FALSE	FALSE	FALSE	FALSE	TRUE	TRUE	0	0.0646984	0.00682967	3.83428	0.0111105	0.0143103	0.0150506	0.0145989	0.00194819	0.228291	0.214154	0.147745	0.047146	0.0452077	0.322905	445	106	744	927	861	619	694	17005582	HIST1H2BC / HIST1H2BE / HIST1H2BF / HIST1H2BG / HIST1H2BI	BC056264 / ENST00000359985	nucleosome assembly / defense response to bacterium	nucleosome/nucleus/intracellular/chromosome	DNA binding/protein heterodimerization activity/sequence-specific DNA binding
ZNF850	0.126973	555	561	0	ZNF850	FALSE	TRUE	TRUE	FALSE	FALSE	TRUE	FALSE	FALSE	FALSE	0	0.0655456	0.00436012	5.39462	0.0216782	0.00718645	0.00503246	0.00677861	0.00177204	0.0739193	0.0337716	0.55527	0.630153	0.488247	0.32329	446	101	561	459	1258	1289	1389	16871718	ZNF850	ENST00000591344 / NM_001193552 / NM_001267779	transcription, DNA-dependent / regulation of transcription, DNA-dependent	nucleus/intracellular	DNA binding/zinc ion binding/nucleic acid binding/metal ion binding
LOC441455	0.12681	680	699	0	LOC441455	FALSE	TRUE	TRUE	FALSE	FALSE	FALSE	TRUE	FALSE	TRUE	0	0.0553176	0.014622	1.74527	0.0148941	0.040867	0.0137099	0.0183348	0.00572105	0.809343	0.107294	0.00158619	0.0675324	0.0142841	0.324045	447	183	1365	751	26	699	304	17087209	LOC441455	NR_026792	NA	NA	NA
IER2	0.126776	480	421	0	IER2	FALSE	TRUE	TRUE	FALSE	TRUE	TRUE	TRUE	FALSE	FALSE	0	0.0472211	0.00524704	6.63488	0.0273982	0.0208278	0.00433619	0.00900663	0.0150906	0.030525	0.0139221	0.0429396	0.720253	0.259713	0.324199	448	312	421	225	553	1345	1212	16858830	IER2	BC072432 / ENST00000292433 / ENST00000587885 / ENST00000588173 / ENST00000592882 / NM_004907	NA	cytoplasm	NA
SAMD4A	0.12668	563	738	0	SAMD4A	FALSE	TRUE	TRUE	FALSE	FALSE	TRUE	FALSE	FALSE	TRUE	0	0.0497789	0.00659998	3.25978	0.0491941	0.0132116	0.0129889	0.0160431	0.0110657	0.340759	0.000844592	0.182683	0.0820475	0.0288117	0.324645	449	264	863	34	912	738	502	16784333	SAMD4A	AL117523 / BC021060 / BC057838 / BC121173 / BC121174 / BX648198 / ENST00000251091 / ENST00000357634 / ENST00000392067 / ENST00000553988 / ENST00000554335 / ENST00000555112 / ENST00000555192 / ENST00000555719 / ENST00000556069 / ENST00000557013 / GENSCAN00000027562 / GENSCAN00000027566 / NM_001161576 / NM_001161577 / NM_015589 / OTTHUMT00000411186 / OTTHUMT00000411187 / OTTHUMT00000411188 / OTTHUM…	negative regulation of translation / positive regulation of translation / regulation of translation	cytoplasm/cell junction/dendrite/synapse/cell projection/neuron projection	translation repressor activity/protein binding
DDIT4	0.126486	641	775	1	DDIT4	FALSE	TRUE	TRUE	FALSE	TRUE	FALSE	FALSE	FALSE	FALSE	0.0785596	0.0382085	0.00534944	8.89074	0.0141775	0.00426011	0.0118968	0.0108141	0.046059	0.00665224	0.122036	0.835553	0.110316	0.14896	0.325542	450	668	259	775	1426	791	1043	16705961	DDIT4	BC007714 / ENST00000307365 / ENST00000471240 / ENST00000473155 / ENST00000491934 / NM_019058	response to hypoxia / neuron migration / brain development / cell proliferation / negative regulation of intracellular protein kinase cascade / negative regulation of peptidyl-threonine phosphorylation / neuron differentiation / negative regulation of TOR signaling cascade / negative regulation of peptidyl-serine phosphorylation / intrinsic apoptotic signaling pathway in response to DNA damage by…	intracellular/cytoplasm/mitochondrion/cytosol	14-3-3 protein binding
ZNF724P	0.126258	692	702	0	ZNF724P	FALSE	FALSE	FALSE	FALSE	TRUE	FALSE	FALSE	TRUE	TRUE	0	0.0259416	0.0159445	8.0809	0.0106519	0.0176219	0.0316494	0.0275617	0.211694	0.0113354	0.233205	0.078265	0.000878954	0.00104015	0.326602	451	1228	286	953	702	31	38	16870925	ZNF724P	AK301230 / NR_045525	transcription, DNA-dependent / regulation of transcription, DNA-dependent	nucleus/intracellular	DNA binding/zinc ion binding/nucleic acid binding/metal ion binding
KRT6A	0.126191	891	752	4	KRT6A	FALSE	FALSE	FALSE	FALSE	FALSE	FALSE	TRUE	TRUE	TRUE	0.18241	0.0288005	0.00733203	2.50877	0.0148895	0.0211179	0.0292868	0.0267256	0.149363	0.551157	0.107381	0.040707	0.00146772	0.00130076	0.326916	452	1146	1084	752	528	46	46	16764923	KRT6A	BC008807 / ENST00000330722 / NM_005554	ectoderm development / positive regulation of cell proliferation / cell differentiation	intermediate filament/keratin filament	structural constituent of cytoskeleton/protein binding/structural molecule activity
CHAF1A	0.126091	815	1133	0	CHAF1A	FALSE	FALSE	FALSE	FALSE	TRUE	FALSE	FALSE	TRUE	TRUE	0	0.0164793	0.00693425	14.5211	0.00754668	0.00506766	0.0185832	0.0154109	0.592923	0.000245833	0.414288	0.759898	0.0187244	0.0350686	0.327383	453	1431	64	1133	1391	325	583	16857192	CHAF1A	BC067093 / ENST00000301280 / ENST00000585371 / ENST00000587368 / ENST00000587580 / NM_005483	DNA replication / DNA repair / DNA replication-dependent nucleosome assembly / transcription, DNA-dependent / regulation of transcription, DNA-dependent / protein complex assembly / cell cycle / chromatin assembly / response to DNA damage stimulus	CAF-1 complex/WINAC complex/nucleus/chromatin assembly complex	chromatin binding/protein binding/unfolded protein binding/chromo shadow domain binding/identical protein binding
MIR205	0.126034	696	779	0	MIR205	FALSE	FALSE	FALSE	FALSE	TRUE	TRUE	FALSE	FALSE	FALSE	0	0.0316555	0.0023622	11.3199	0.020849	0.00437286	0.0121371	0.0115691	0.104757	0.00147609	0.0386536	0.825413	0.10335	0.117522	0.327646	454	1046	140	511	1420	779	979	16676954	MIR205 / MIR205HG	AK002208 / AK091113 / AY320401 / BC063704 / ENST00000366437 / ENST00000384891 / ENST00000419143 / ENST00000429156 / ENST00000431096 / ENST00000433108 / ENST00000440276 / ENST00000444286 / ENST00000451937 / ENST00000458250 / hsa-mir-205 / n338507 / n377713 / n377997 / n378301 / n378357 / n378613 / n378717 / n378916 / n379092 / n408457 / NM_001104548 / NR_029622 / OTTHUMT00000088231 / OTTHUMT000000…	NA	NA	NA
CDH5	0.125969	637	833	1	CDH5	FALSE	FALSE	FALSE	FALSE	TRUE	FALSE	TRUE	FALSE	FALSE	0.0785596	0.0355151	0.00274341	6.88797	0.0110853	0.0269476	0.00964759	0.0126507	0.0645722	0.0255771	0.21516	0.0144295	0.202672	0.0835341	0.327951	455	833	386	930	225	923	894	16819794	CDH5	ENST00000341529 / ENST00000562048 / ENST00000565334 / NM_001795 / U84722	blood vessel maturation / homophilic cell adhesion / negative regulation of cell proliferation / cell junction assembly / adherens junction organization / cell-cell junction organization / regulation of establishment of cell polarity / cell adhesion	plasma membrane/cell-cell junction/tight junction/membrane/integral to membrane/cell junction/cell periphery	receptor binding/calcium ion binding/protein binding/beta-catenin binding/protein phosphatase binding/ion channel binding/metal ion binding
EEF1A1	0.125966	728	681	2	EEF1A1	FALSE	TRUE	TRUE	FALSE	FALSE	FALSE	TRUE	FALSE	TRUE	0.124514	0.0519394	0.00370648	2.15758	0.0039644	0.0286683	0.0140221	0.015625	0.0085378	0.66966	0.751932	0.0107661	0.0620904	0.0328067	0.327965	456	225	1218	1363	179	681	553	17118171	EEF1A1	ENST00000331523 / TCONS_l2_00030085-XLOC_l2_015397	transcription, DNA-dependent / regulation of transcription, DNA-dependent / translation / translational elongation / gene expression / cellular protein metabolic process / GTP catabolic process	nucleus/cytoplasm/cytosol/eukaryotic translation elongation factor 1 complex/plasma membrane	translation elongation factor activity/GTPase activity/protein binding/GTP binding/protein kinase binding/nucleotide binding
HMGCS1	0.125816	685	527	1	HMGCS1	FALSE	TRUE	FALSE	FALSE	FALSE	TRUE	FALSE	TRUE	TRUE	0.0785596	0.0315456	0.00781042	5.81416	0.0211104	0.0162165	0.0221855	0.0211011	0.106206	0.0546488	0.0370358	0.102347	0.00761484	0.006285	0.328665	457	1053	527	493	758	171	164	16995890	HMGCS1	AK025736 / BC083514 / BT007302 / BX537620 / ENST00000325110 / ENST00000433297 / ENST00000507004 / ENST00000507293 / ENST00000508319 / ENST00000511774 / ENST00000514610 / GENSCAN00000016363 / L25798 / NM_001098272 / NM_002130 / OTTHUMT00000368022 / OTTHUMT00000368023 / OTTHUMT00000368024 / OTTHUMT00000368025 / OTTHUMT00000368026 / OTTHUMT00000368027 / OTTHUMT00000368028 / OTTHUMT00000368029 / uc00…	response to acid / liver development / lipid metabolic process / cholesterol biosynthetic process / brain development / isoprenoid biosynthetic process / male gonad development / response to low light intensity stimulus / response to purine-containing compound / response to vitamin E / response to drug / cellular lipid metabolic process / small molecule metabolic process / response to tellurium i…	nucleus/nucleolus/cytoplasm/cytosol/plasma membrane	hydroxymethylglutaryl-CoA synthase activity/drug binding/isomerase activity/protein homodimerization activity/organic acid binding/catalytic activity/transferase activity
CST6	0.125729	619	606	2	CST6	FALSE	TRUE	TRUE	FALSE	FALSE	TRUE	TRUE	FALSE	FALSE	0.124514	0.0398542	0.0088174	4.4087	0.0237832	0.0201091	0.0100333	0.0128585	0.0374907	0.15108	0.0241557	0.0490472	0.182721	0.0782279	0.329076	458	585	654	348	606	902	877	16727232	CST6	BC031334 / ENST00000312134 / NM_001323	epidermis development / anatomical structure morphogenesis / negative regulation of peptidase activity	cornified envelope/extracellular region	cysteine-type endopeptidase inhibitor activity/peptidase inhibitor activity
SNORD18B	0.125117	595	635	0	SNORD18B	FALSE	TRUE	TRUE	FALSE	FALSE	FALSE	TRUE	FALSE	TRUE	0	0.0613362	0.0184916	2.67242	0.0190185	0.02072	0.0144875	0.0159038	0.0028494	0.499411	0.0523976	0.0438022	0.0548007	0.0300836	0.331953	459	133	1030	635	567	663	519	16810972	RPL4 / SNORD16 / SNORD18A / SNORD18B / SNORD18C	ENST00000564647 / NR_002442	nuclear-transcribed mRNA catabolic process, nonsense-mediated decay / translation / translational initiation / translational elongation / translational termination / SRP-dependent cotranslational protein targeting to membrane / gene expression / viral reproduction / RNA metabolic process / mRNA metabolic process / viral infectious cycle / viral transcription / cellular protein metabolic process	nucleus/nucleolus/cytoplasm/cytosol/cytosolic large ribosomal subunit/ribonucleoprotein complex/ribosome	RNA binding/structural constituent of ribosome/protein binding
RAP1B	0.125113	639	892	1	RAP1B	FALSE	TRUE	TRUE	FALSE	FALSE	TRUE	FALSE	FALSE	FALSE	0.0785596	0.0595618	0.0143521	2.76608	0.0206165	0.0136309	0.0100607	0.0115354	0.00349182	0.471152	0.0401576	0.168469	0.181381	0.118777	0.331974	460	146	997	528	892	899	981	16753779	LOC101060439 / RAP1B	AB062128 / AF493913 / AJ420497 / AK298818 / AK301401 / AK301428 / AK311559 / AK316447 / AK316543 / BC000176 / BC078173 / BC095467 / BT020093 / CR407689 / ENST00000250559 / ENST00000341355 / ENST00000378985 / ENST00000393436 / ENST00000425247 / ENST00000450214 / ENST00000453560 / ENST00000460800 / ENST00000463493 / ENST00000501412 / ENST00000534899 / ENST00000535492 / ENST00000537460 / ENST0000053…	energy reserve metabolic process / small GTPase mediated signal transduction / blood coagulation / cell proliferation / platelet activation / small molecule metabolic process / regulation of insulin secretion / regulation of establishment of cell polarity / GTP catabolic process / signal transduction / Rap protein signal transduction / establishment of endothelial barrier / cellular response to c…	intracellular/lipid particle/cytosol/plasma membrane/cell-cell junction/membrane/cytoplasm/cell junction/guanyl-nucleotide exchange factor complex	GTPase activity/protein binding/GTP binding/GDP binding/nucleotide binding/Ras GTPase binding
HIST1H1B	0.124994	687	757	0	HIST1H1B	FALSE	FALSE	FALSE	FALSE	TRUE	FALSE	TRUE	FALSE	TRUE	0	0.0258622	0.00636191	9.91227	0.0105565	0.0288167	0.0126085	0.0151389	0.213727	0.00347352	0.237379	0.0105006	0.0909496	0.0381763	0.332534	461	1232	199	963	172	757	623	17016499	HIST1H1B	BC069101 / ENST00000331442 / NM_005322	nucleosome assembly	nucleosome/nuclear chromatin/nucleus/chromosome	DNA binding
MTX2	0.124657	674	374	0	MTX2	FALSE	TRUE	TRUE	FALSE	FALSE	FALSE	TRUE	TRUE	TRUE	0	0.0621815	0.00956922	1.48282	0.0136648	0.0273053	0.0177796	0.0190243	0.00258804	0.887032	0.133905	0.0135705	0.023023	0.0116082	0.334133	462	128	1434	800	210	374	265	16887993	MTX2	AF053551 / AK289359 / AK303564 / AK315918 / BC017271 / BC067831 / BC088359 / ENST00000249442 / ENST00000392529 / ENST00000420864 / ENST00000423461 / ENST00000443241 / ENST00000452865 / GENSCAN00000041760 / n408049 / NM_006554 / NR_027850 / OTTHUMT00000255695 / OTTHUMT00000255696 / OTTHUMT00000334061 / OTTHUMT00000334064 / OTTHUMT00000399658 / uc002ukw.3 / uc002ukx.3	protein targeting to mitochondrion / mitochondrial transport / cellular protein metabolic process / transport / protein transport	mitochondrial outer membrane/mitochondrion/membrane	NA
FAM84B	0.12465	673	596	0	FAM84B	FALSE	FALSE	FALSE	FALSE	TRUE	FALSE	TRUE	TRUE	TRUE	0	0.0273678	0.00592404	9.13916	0.0097441	0.0202584	0.0220651	0.0207372	0.17808	0.00566691	0.276127	0.0477068	0.00784176	0.00698963	0.334164	463	1185	239	1010	596	177	184	17081002	FAM84B	BC052957 / ENST00000304916 / ENST00000517458 / NM_174911	NA	cytoplasm/plasma membrane	protein binding
GTF2IRD2B	0.124513	539	437	0	GTF2IRD2B	FALSE	TRUE	TRUE	FALSE	FALSE	TRUE	TRUE	TRUE	TRUE	0	0.0400671	0.00525683	3.69421	0.0251012	0.0352349	0.0170933	0.0207842	0.0365072	0.252102	0.0196903	0.00371401	0.0275131	0.00689415	0.334817	464	578	771	299	69	437	178	17047268	GTF2IRD2B	ENST00000312575 / NM_001003795	transcription, DNA-dependent / regulation of transcription, DNA-dependent	nucleus	DNA binding/nucleic acid binding/zinc ion binding
TMSB4X	0.124484	564	684	0	TMSB4X	FALSE	TRUE	TRUE	FALSE	FALSE	FALSE	FALSE	TRUE	TRUE	0	0.065963	0.00385836	4.19938	0.00942531	0.00532508	0.0183482	0.0154341	0.00169147	0.175747	0.292998	0.734775	0.0198868	0.0348163	0.334956	465	99	684	1023	1369	339	579	17101543	TMSB4X	AK055976 / ENST00000380636 / ENST00000451311 / NM_021109	osteoblast differentiation / platelet degranulation / blood coagulation / actin cytoskeleton organization / platelet activation / sequestering of actin monomers / cytoskeleton organization	extracellular region/cytoskeleton/platelet alpha granule lumen/cytoplasm	actin binding/protein binding
SCEL	0.123998	508	406	0	SCEL	FALSE	TRUE	TRUE	FALSE	TRUE	TRUE	FALSE	FALSE	FALSE	0	0.0438223	0.00258534	8.35598	0.0268544	0.0119885	0.00451063	0.00761893	0.0229008	0.0094414	0.0150968	0.231223	0.697657	0.388973	0.33728	466	406	276	236	958	1331	1327	16775546	SCEL	AK301659 / ENST00000349847 / ENST00000377246 / ENST00000469982 / ENST00000471491 / ENST00000535157 / NM_001160706 / NM_003843 / NM_144777	epidermis development / embryo development / keratinocyte differentiation	cornified envelope/cytoplasm/plasma membrane/membrane	protein binding/zinc ion binding/metal ion binding
GADD45B	0.123935	685	647	1	GADD45B	FALSE	FALSE	FALSE	FALSE	TRUE	FALSE	FALSE	TRUE	TRUE	0.0785596	0.0325708	0.00361082	7.61608	0.0185716	0.00935401	0.0171753	0.0159881	0.0934235	0.0155026	0.0565107	0.379924	0.0269316	0.0293075	0.337581	467	1005	324	647	1102	430	504	16856803	GADD45B	AF087853 / ENST00000215631 / ENST00000585359 / ENST00000586759 / ENST00000592937 / NM_015675	activation of MAPKKK activity / activation of MAPKK activity / negative regulation of protein kinase activity / apoptotic process / response to stress / multicellular organismal development / cell differentiation / regulation of cell cycle	nucleus	protein binding
HIST2H2AB	0.123862	556	516	0	HIST2H2AB	FALSE	TRUE	TRUE	FALSE	TRUE	FALSE	FALSE	TRUE	TRUE	0	0.0412964	0.00433016	8.92241	0.00615255	0.00872356	0.0186678	0.0159675	0.0313216	0.00651715	0.530903	0.425927	0.0183238	0.0294953	0.337932	468	516	256	1225	1144	322	509	16692636	HIST2H2AB	ENST00000331128 / ENST00000579360 / NM_175065	nucleosome assembly	nucleosome/nucleus/chromosome/intracellular	DNA binding/protein heterodimerization activity/sequence-specific DNA binding
OTTHUMG00000184015	0.123808	526	671	0	OTTHUMG00000184015	FALSE	TRUE	TRUE	FALSE	FALSE	TRUE	FALSE	FALSE	FALSE	0	0.0598514	0.00527003	4.31001	0.0284433	0.0169253	0.00407325	0.0082461	0.00337741	0.162259	0.0119369	0.0893659	0.754005	0.325218	0.338191	469	143	671	200	731	1363	1277	17110369	OTTHUMG00000184015 / RP6-99M1.2	ENST00000602444 / ENST00000602461 / ENST00000602507 / ENST00000602527 / n344736 / n371494 / OTTHUMT00000467765 / OTTHUMT00000467990 / TCONS_00017313-XLOC_008149	NA	NA	NA
RNU6-60	0.123798	565	263	0	RNU6 60	FALSE	TRUE	TRUE	FALSE	FALSE	TRUE	TRUE	TRUE	TRUE	0	0.0498198	0.0131121	2.3004	0.026053	0.0299277	0.0171937	0.0200543	0.0110112	0.620599	0.0170311	0.00872196	0.0268025	0.00854448	0.338239	470	263	1152	261	154	427	212	16774762	RNU6-60	ENST00000364792	NA	NA	NA
LOC100129033	0.123783	609	441	0	LOC100129033	FALSE	TRUE	TRUE	FALSE	FALSE	FALSE	TRUE	TRUE	TRUE	0	0.0485251	0.0081832	2.66183	0.00901473	0.0421996	0.0170364	0.0205618	0.0128777	0.502671	0.31622	0.00130694	0.0279238	0.00735833	0.338311	471	290	1035	1048	21	441	189	17118156	LOC100129033 / OTTHUMG00000150351 / OTTHUMG00000150352 / OTTHUMG00000150353 / RP11-239L20.3 / RP11-239L20.4 / RP11-239L20.5	AK296222 / AY358807 / ENST00000360992 / ENST00000411551 / ENST00000441186 / GENSCAN00000012099 / OTTHUMT00000317758 / OTTHUMT00000317759 / OTTHUMT00000317760 / TCONS_l2_00022830-XLOC_l2_011987 / TCONS_l2_00022835-XLOC_l2_011987	NA	integral to membrane/membrane	NA
RNA5SP60	0.123779	498	666	0	RNA5SP60	FALSE	TRUE	TRUE	FALSE	TRUE	FALSE	FALSE	FALSE	TRUE	0	0.0443966	0.00880207	7.24866	0.0165066	0.0137607	0.0143923	0.0144633	0.0213346	0.0199281	0.0806629	0.164298	0.0562158	0.0471737	0.338329	472	388	354	702	885	666	712	16672426	RNA5SP60	ENST00000410620	NA	NA	NA
MIR31HG	0.123777	496	419	0	MIR31HG	FALSE	TRUE	TRUE	FALSE	TRUE	FALSE	TRUE	FALSE	FALSE	0	0.045271	0.0129206	6.67262	0.0102603	0.0257364	0.0109134	0.0133295	0.0191586	0.0297278	0.25083	0.017797	0.144047	0.0674155	0.338337	473	368	419	978	281	846	827	17092870	MIR31HG	ENST00000304425 / NR_027054	NA	NA	NA
TOMM34	0.123347	541	500	0	TOMM34	FALSE	TRUE	TRUE	FALSE	FALSE	FALSE	TRUE	TRUE	TRUE	0	0.0416643	0.00457713	3.92679	0.0121019	0.0376687	0.0191744	0.0216674	0.0299211	0.213726	0.178258	0.00255444	0.0161054	0.00533255	0.340412	474	500	722	868	45	289	145	16919508	TOMM34	BC001763 / ENST00000372813 / NM_006809	protein targeting to mitochondrion	mitochondrial outer membrane/integral to membrane/cytoplasm/mitochondrion/membrane	heat shock protein binding/protein binding
RNA5SP290	0.122995	753	729	0	RNA5SP290	FALSE	TRUE	TRUE	FALSE	FALSE	FALSE	TRUE	FALSE	FALSE	0	0.0721495	0.010922	1.81251	0.0023441	0.024424	0.0131032	0.0140934	0.000858615	0.787469	0.908739	0.0224145	0.07955	0.0529894	0.342118	475	81	1347	1430	337	729	755	17096544	RNA5SP290	ENST00000517133 / uc022bkv.1	NA	NA	NA
PDLIM7	0.122884	670	738	2	PDLIM7	FALSE	TRUE	FALSE	FALSE	FALSE	FALSE	TRUE	FALSE	FALSE	0.124514	0.0365204	0.00372502	5.02742	0.0155038	0.0262437	0.00896898	0.0123927	0.0569169	0.0964386	0.0962506	0.0162942	0.242853	0.0906295	0.342656	476	770	588	738	252	969	912	17003291	PDLIM7	AF265209 / AF345904 / AF345905 / AF345906 / AK096826 / AK131426 / BC001093 / BC014521 / BC067806 / BC084575 / ENST00000355572 / ENST00000355841 / ENST00000356618 / ENST00000359895 / ENST00000393546 / ENST00000393551 / ENST00000463411 / ENST00000486828 / ENST00000493815 / ENST00000503346 / ENST00000503827 / ENST00000504318 / ENST00000504380 / ENST00000505074 / ENST00000506161 / ENST00000506537 / G…	ossification / receptor-mediated endocytosis / multicellular organismal development / actin cytoskeleton organization / cell differentiation / positive regulation of osteoblast differentiation	stress fiber/ruffle/cytoplasm/focal adhesion/actin cytoskeleton/cell junction/cytoskeleton	protein binding/zinc ion binding/metal ion binding
LRRC61	0.122635	685	650	0	LRRC61	FALSE	FALSE	FALSE	FALSE	TRUE	FALSE	FALSE	TRUE	TRUE	0	0.0257162	0.00656532	9.83531	0.0185173	0.0138729	0.0189519	0.0180691	0.217509	0.00364465	0.0570342	0.160773	0.0170429	0.0154796	0.343867	477	1236	207	650	881	303	320	17053316	LRRC61	AK098061 / ENST00000323078 / ENST00000359623 / ENST00000463441 / ENST00000471872 / ENST00000493307 / NM_001142928 / NM_023942	NA	NA	protein binding
MAZ	0.122383	706	717	4	MAZ	FALSE	TRUE	TRUE	FALSE	FALSE	FALSE	TRUE	FALSE	FALSE	0.18241	0.038491	0.0031456	3.97233	0.0159157	0.0232468	0.00668325	0.0102132	0.0444578	0.206881	0.0894868	0.0276502	0.435086	0.179613	0.3451	478	650	717	721	389	1147	1095	16817666	MAZ	EF059746 / ENST00000219782 / ENST00000322945 / ENST00000545521 / ENST00000561855 / ENST00000562337 / ENST00000565777 / NM_001042539 / NM_001276275 / NM_001276276 / NM_002383 / NR_074080	transcription initiation from RNA polymerase II promoter / termination of RNA polymerase II transcription / positive regulation of transcription from RNA polymerase II promoter / transcription, DNA-dependent / regulation of transcription, DNA-dependent / transcription from RNA polymerase II promoter	nucleus/cytoplasm/intracellular	RNA polymerase II core promoter sequence-specific DNA binding/sequence-specific DNA binding RNA polymerase II transcription factor activity/chromatin binding/RNA binding/protein binding/zinc ion binding/nucleic acid binding/DNA binding/metal ion binding
TP53INP1	0.122121	617	481	0	TP53INP1	FALSE	FALSE	FALSE	FALSE	TRUE	TRUE	TRUE	FALSE	TRUE	0	0.0317121	0.00357432	7.64465	0.0253037	0.0218384	0.0139043	0.0161766	0.104019	0.0152048	0.0190884	0.0356766	0.0640884	0.0276446	0.346385	479	1042	322	292	481	686	488	17079317	TP53INP1	AF409114 / ENST00000342697 / ENST00000378776 / ENST00000448464 / NM_001135733 / NM_033285	transcription, DNA-dependent / autophagy / apoptotic process / induction of apoptosis / response to stress / cell cycle arrest / negative regulation of cell proliferation / positive regulation of autophagy / negative regulation of cell migration / positive regulation of transcription, DNA-dependent / autophagic cell death / regulation of transcription, DNA-dependent	nucleus/autophagic vacuole/cytosol/PML body/cytoplasmic vesicle/cytoplasm	protein binding/antioxidant activity
TTC30B	0.122049	501	501	0	TTC30B	FALSE	TRUE	TRUE	FALSE	FALSE	TRUE	TRUE	FALSE	FALSE	0	0.0491493	0.00743802	4.05927	0.0209511	0.0314775	0.00931133	0.0139757	0.0119401	0.194385	0.0380125	0.00675989	0.221734	0.0549898	0.346739	480	276	703	501	121	947	768	16905516	TTC30B	AK296828 / ENST00000408939 / NM_152517	cell projection organization	cilium/cell projection	protein binding
GGT3P	0.121999	625	783	0	GGT3P	FALSE	TRUE	FALSE	FALSE	TRUE	FALSE	FALSE	FALSE	FALSE	0	0.0360916	0.00534216	9.86415	0.0170882	0.00861738	0.0120654	0.0119093	0.0600641	0.00357951	0.0728914	0.434091	0.105381	0.105571	0.346983	481	794	204	688	1158	783	948	16932103	AC011718.1 / GGT1 / GGT2 / GGT3P / GGT8P / GGTLC1 / GGTLC2 / GGTLC3 / LOC101060682 / OTTHUMG00000150681	BC025927 / BC053652 / BC069326 / BC069473 / BC069504 / BC069534 / BC128238 / BC128239 / BC143607 / CR456494 / ENST00000248923 / ENST00000278765 / ENST00000335694 / ENST00000401885 / ENST00000401924 / ENST00000404223 / ENST00000404532 / ENST00000404912 / ENST00000404920 / ENST00000405188 / ENST00000412448 / ENST00000412874 / ENST00000417145 / ENST00000418938 / ENST00000424627 / ENST00000424787 / E…	glutathione metabolic process / glutathione biosynthetic process / leukotriene biosynthetic process / xenobiotic metabolic process / small molecule metabolic process / glutathione derivative biosynthetic process / regulation of immune system process / cellular amino acid metabolic process / leukotriene metabolic process / spermatogenesis / cysteine biosynthetic process / arachidonic acid metaboli…	integral to membrane/anchored to external side of plasma membrane/cellular_component/plasma membrane/membrane	gamma-glutamyltransferase activity/glutathione hydrolase activity/transferase activity/transferase activity, transferring acyl groups/hydrolase activity/protein binding
HSPBP1	0.121976	639	764	1	HSPBP1	FALSE	TRUE	TRUE	FALSE	FALSE	TRUE	FALSE	FALSE	FALSE	0.0785596	0.0570367	0.00602829	2.74172	0.0278231	0.0161718	0.00524227	0.00894559	0.00467819	0.478401	0.0130743	0.103229	0.603415	0.264513	0.347097	482	168	1002	213	764	1266	1216	16875710	HSPBP1	AB020592 / AF093420 / AF187859 / AK294358 / BC001236 / BC002373 / CR457118 / ENST00000255631 / ENST00000376343 / ENST00000433386 / ENST00000585698 / ENST00000585927 / ENST00000587551 / ENST00000587922 / ENST00000587959 / ENST00000588971 / ENST00000593263 / GENSCAN00000023809 / NM_001130106 / NM_012267 / OTTHUMT00000452670 / OTTHUMT00000452671 / OTTHUMT00000452672 / OTTHUMT00000452673 / OTTHUMT000…	protein folding / positive regulation of protein ubiquitination / positive regulation of proteasomal ubiquitin-dependent protein catabolic process / negative regulation of catalytic activity	NA	enzyme inhibitor activity/protein binding/binding
ALG1L2	0.121852	735	734	0	ALG1L2	FALSE	TRUE	TRUE	FALSE	FALSE	FALSE	TRUE	FALSE	FALSE	0	0.0731623	0.0161641	1.95705	0.0156964	0.0238975	0.00331292	0.00777564	0.00077	0.738833	0.0930216	0.0246124	0.846108	0.372199	0.34771	483	74	1293	734	365	1411	1315	16945456	ALG1L2	ENST00000503500 / ENST00000507643 / NM_001136152	NA	NA	transferase activity, transferring glycosyl groups/transferase activity
RPP30	0.121662	654	910	2	RPP30	FALSE	TRUE	TRUE	FALSE	FALSE	FALSE	TRUE	FALSE	FALSE	0.124514	0.0509937	0.0112474	2.86677	0.0113876	0.0230771	0.00910149	0.0116213	0.00956114	0.441974	0.203428	0.0285066	0.234467	0.115607	0.348646	484	241	963	910	402	959	969	16707291	RPP30	AK296196 / BC006991 / ENST00000277882 / ENST00000371703 / ENST00000413330 / ENST00000414836 / ENST00000466462 / ENST00000470933 / ENST00000479678 / ENST00000480406 / ENST00000487998 / ENST00000489806 / GENSCAN00000033871 / NM_001104546 / NM_006413 / OTTHUMT00000049347 / OTTHUMT00000049349 / OTTHUMT00000049350 / OTTHUMT00000049351 / OTTHUMT00000049352 / OTTHUMT00000049353 / OTTHUMT00000049354 / OT…	tRNA processing	nucleus/nucleolar ribonuclease P complex/nucleolus	ribonuclease P activity/catalytic activity/ribonuclease activity/hydrolase activity
TPCN1	0.121602	585	710	0	TPCN1	FALSE	TRUE	TRUE	FALSE	TRUE	FALSE	FALSE	FALSE	FALSE	0	0.0406845	0.00542743	9.85158	0.0161302	0.0129937	0.00410136	0.00658582	0.0338018	0.00360775	0.0861685	0.190534	0.750423	0.51309	0.348943	485	552	205	710	922	1359	1402	16757427	TPCN1	AK075071 / AK295022 / AK296268 / AY083666 / BC136795 / BC136796 / BC142664 / BC150203 / BC152423 / ENST00000335509 / ENST00000392569 / ENST00000428632 / ENST00000541517 / ENST00000546503 / ENST00000546781 / ENST00000546907 / ENST00000547275 / ENST00000547955 / ENST00000548465 / ENST00000550543 / ENST00000550785 / ENST00000550873 / ENST00000551096 / ENST00000551099 / ENST00000551127 / ENST00000552…	ion transmembrane transport / transmembrane transport / transport / ion transport / calcium ion transport / regulation of ion transmembrane transport / calcium ion transmembrane transport	lysosomal membrane/endosome membrane/integral to membrane/lysosome/endosome/membrane	voltage-gated ion channel activity/protein binding/identical protein binding/NAADP-sensitive calcium-release channel activity/ion channel activity/calcium channel activity
BMS1P1	0.121522	587	514	0	BMS1P1	FALSE	TRUE	TRUE	FALSE	FALSE	FALSE	TRUE	TRUE	TRUE	0	0.0413853	0.00466023	4.92818	0.00240046	0.0406196	0.0165058	0.0193493	0.0309771	0.10364	0.904127	0.00164476	0.0320833	0.0105338	0.349336	486	514	599	1426	27	488	246	16713708	AGAP9 / BMS1P1 / BMS1P2 / BMS1P5 / BMS1P6 / BMS1P7 / LOC100996797 / OTTHUMG00000018158 / OTTHUMG00000167454 / RP11-144G6.12 / RP11-508M1.3	AK309024 / AL832069 / BC065722 / BC131568 / CR936774 / ENST00000374336 / ENST00000413193 / ENST00000431840 / ENST00000445221 / ENST00000449800 / ENST00000450360 / ENST00000453919 / ENST00000456732 / ENST00000458344 / ENST00000509393 / ENST00000532854 / ENST00000580094 / ENST00000580164 / ENST00000584334 / ENST00000584653 / ENST00000602440 / GENSCAN00000003779 / GENSCAN00000009268 / GENSCAN0000002…	regulation of ARF GTPase activity / positive regulation of GTPase activity	NA	phospholipid binding/ARF GTPase activator activity/zinc ion binding/protein binding/GTPase activity/GTP binding/metal ion binding/GTPase activator activity
MDM4	0.121438	882	836	4	MDM4	FALSE	TRUE	FALSE	FALSE	FALSE	FALSE	TRUE	TRUE	TRUE	0.18241	0.035493	0.00831581	1.98714	0.00591747	0.0287344	0.0217664	0.021607	0.0647514	0.728522	0.552795	0.0106471	0.00843596	0.00542657	0.349752	487	836	1276	1247	175	184	150	16676314	MDM4	AB209383 / AF007111 / AK303626 / AK304698 / AK310607 / AY923176 / AY949028 / BC025993 / BC067299 / BC105106 / CR749470 / ENST00000367179 / ENST00000367180 / ENST00000367182 / ENST00000367183 / ENST00000391947 / ENST00000444261 / ENST00000454264 / ENST00000463049 / ENST00000470797 / ENST00000470908 / ENST00000471783 / ENST00000507825 / GENSCAN00000033559 / n406642 / NM_001204171 / NM_001204172 / N…	negative regulation of transcription from RNA polymerase II promoter / protein complex assembly / cell proliferation / positive regulation of cell proliferation / negative regulation of cell proliferation / DNA damage response, signal transduction by p53 class mediator / negative regulation of protein catabolic process / negative regulation of apoptotic process / G0 to G1 transition / protein sta…	nucleus/intracellular	protein binding/zinc ion binding/enzyme binding/metal ion binding
MT1M	0.121413	744	951	0	MT1M	FALSE	FALSE	FALSE	FALSE	TRUE	TRUE	FALSE	FALSE	FALSE	0	0.0246365	0.0046235	12.0907	0.0208371	0.0096657	0.00924048	0.0102777	0.247385	0.000940945	0.0387287	0.358741	0.22596	0.176055	0.349877	488	1265	118	512	1084	951	1091	16819224	MT1M	BC028280 / ENST00000379818 / NM_176870	negative regulation of growth / cellular response to zinc ion	nucleus/cytoplasm/perinuclear region of cytoplasm	zinc ion binding/metal ion binding
PCDHB13	0.121228	497	459	0	PCDHB13	FALSE	TRUE	TRUE	FALSE	FALSE	TRUE	FALSE	TRUE	TRUE	0	0.0483155	0.0137377	3.78399	0.0277108	0.0193313	0.0167724	0.0181104	0.0132093	0.23659	0.0132926	0.0567004	0.0299176	0.0152871	0.350797	489	293	755	216	654	459	317	16990312	PCDHB13	AF217745 / ENST00000341948 / NM_018933	homophilic cell adhesion / synaptic transmission / synapse assembly / calcium-dependent cell-cell adhesion / cell adhesion	plasma membrane/integral to membrane/membrane	calcium ion binding
SNORD109A	0.121186	546	603	0	SNORD109A	FALSE	TRUE	TRUE	FALSE	FALSE	TRUE	FALSE	TRUE	TRUE	0	0.0395192	0.00642157	4.5726	0.0256598	0.014346	0.0271217	0.0248706	0.0390925	0.134159	0.0180784	0.14673	0.00238316	0.00215676	0.351006	490	603	634	277	859	66	73	16798083	SNORD109A / SNORD109B	NR_001289 / NR_001295	NA	NA	NA
SNORD109A	0.121186	546	603	0	SNORD109A	FALSE	TRUE	TRUE	FALSE	FALSE	TRUE	FALSE	TRUE	TRUE	0	0.0395192	0.00642157	4.5726	0.0256598	0.014346	0.0271217	0.0248706	0.0390925	0.134159	0.0180784	0.14673	0.00238316	0.00215676	0.351006	490	603	634	277	859	66	73	16798440	SNORD109A / SNORD109B	NR_001289 / NR_001295	NA	NA	NA
[truncated: 979 more rows]
