# Supplementary material for: TTCA: an R package for the identification of differentially expressed genes in time course microarray data
Source: Springer Nature journal article supplement (doi:10.1186/s12859-016-1440-8), 2017-01-14
Supplement: MOESM2 [file 12859_2016_1440_MOESM2_ESM.pdf]

# TTCA: An R package for the identification of differentially expressed genes in time course microarray data - Supplementary Information 1

Marco Albrecht, Damian Stichel, Benedikt Müller, Ruth Merkle, Carsten Sticht, Norbert Gretz, Ursula Klingmüller, Kai Breuhahn and Franziska Matthäus

## Method test: FPCA

We applied the FPCA code on another EGF data set (GSE34228) with dense longitudinal replication. Figure S8 A left shows a good fit of the original data for one highly significant gene. As a control we included the original data by ourselves and did not trust the original data displayed by FPCA. We saw strong differences between our original values and original values displayed by FPCA shown in Figure S1 A right. Also in our data set we observed differences between the fit and our original data as shown in Figure S1 B. We applied FPCA to a further data set of NSCLC cells stimulated with HGF and TGF $\beta$ . The PCR measurement of a known target gene (Figure S1 C left) exhibits specific dynamics which are no longer present after applying FPCA (Figure S1 C right). Also the p-value of 0.53 is not what we expected for a target gene after stimulation.

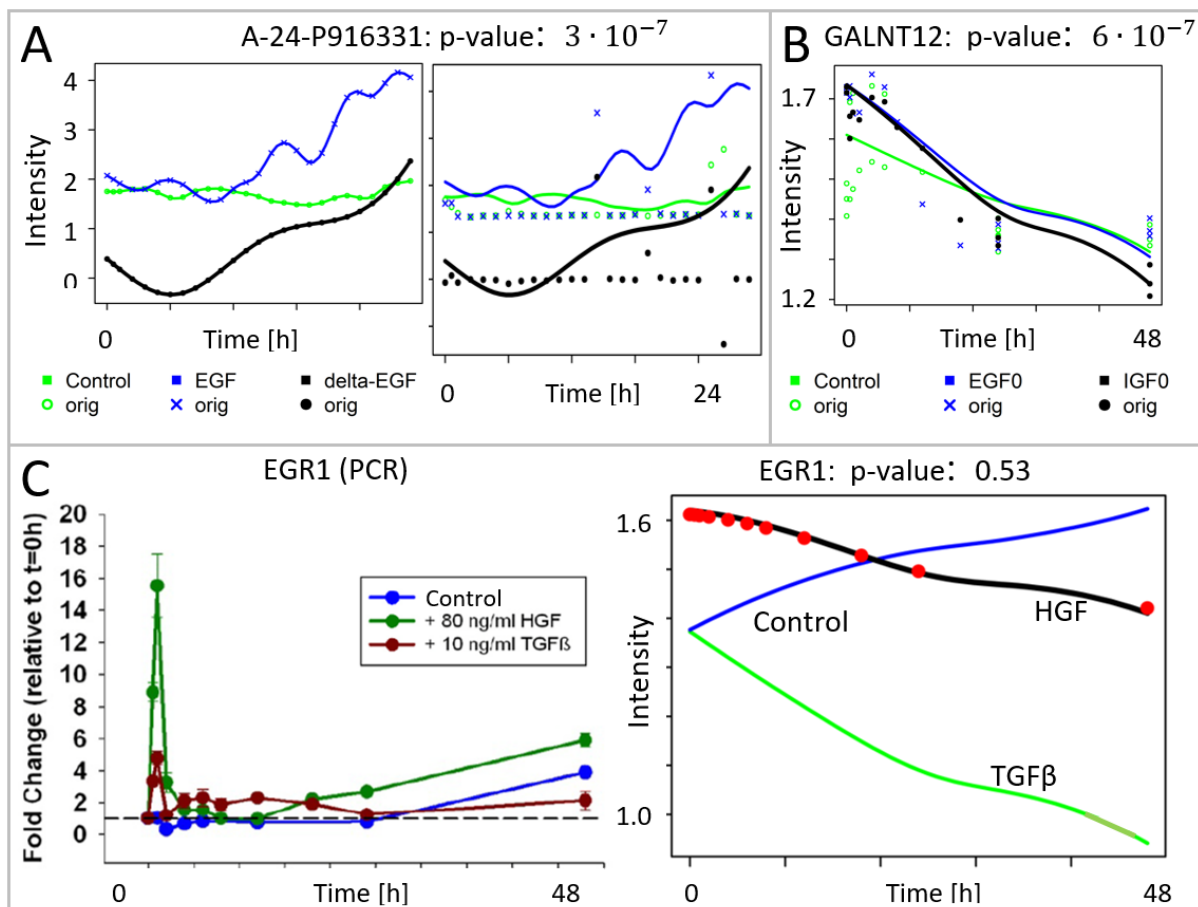

Figure S1: A) FPCA application on data set GSE34228. Left: Seemingly good function fit to the “original” values displayed by FPCA. Right: Unprocessed original data with function fit by FPCA. B) Typical stiff function fit by FPCA with our data set and with our original measurement points. C) Left: Target gene of interest which is measured with PCR. Right: Output of FPCA shows “original” measurement data and function fit. P-value of known target gene is considered as not significant by FPCA.

## Method comparison: Overview

Table S1: Method overview. Summarizes methods with comments about their applicability.

| METHOD                       | CITE     | PROBLEM                                                                                                                                                                                                                                                                                                                                                                                                                |
|------------------------------|----------|------------------------------------------------------------------------------------------------------------------------------------------------------------------------------------------------------------------------------------------------------------------------------------------------------------------------------------------------------------------------------------------------------------------------|
| SAM                          | [1]      | Only contrast, no time course analysis                                                                                                                                                                                                                                                                                                                                                                                 |
| ANOVA                        | [2]      | Only contrast, no time course analysis                                                                                                                                                                                                                                                                                                                                                                                 |
| LIMMA                        | [3]      | Only contrast, no time course analysis, time course analysis possible using regression spline or a polynomial (not published time course method), our data set was processed in 1.65 seconds.                                                                                                                                                                                                                          |
| EDGE                         | [5,6]    | Our data set was processed in 22 seconds, however, expected genes were not detected.                                                                                                                                                                                                                                                                                                                                   |
| MASIGPRO                     | [7]      | Expected genes are not detected, provides separate p-values: one for single time course and one for contrast. Detect significant genes for subsequent gene cluster analysis. Our data set was processed in 6.3 minutes.                                                                                                                                                                                                |
| SOHN ET AL                   | [8,9]    | P-value granularity. Expected genes are not detected. Paper describes quantile regression with penalty term, but in practice the simpler function <code>rq()</code> without penalty term is used for quantile regression. Quantil regression with penalty term is implemented in function <code>rqss()</code> in <code>Quantreg</code> package. Method becomes computational too expensive using the correct function. |
| R PACKAGE<br>TIMECOURSE      | [10]     | No significance threshold. Requires time point replicates.                                                                                                                                                                                                                                                                                                                                                             |
| BETR                         | [11]     | Requires time point replicates.                                                                                                                                                                                                                                                                                                                                                                                        |
| NETWORK-<br>BASED<br>METHODS | [12]     | Coded in C++ only. Tested with four time point replicates.                                                                                                                                                                                                                                                                                                                                                             |
| NETWORK-<br>BASED<br>METHODS | [13]     | NACEP is coded in C and can be used in R. Requires time courses with the same number of time points. NACEP clusters genes as first step and the detection of a particular genes depends on other genes. Focus is on gene regulated networks, transcription factors and differentiation processes: <a href="http://systemsbio.ucsd.edu/NACEP/">http://systemsbio.ucsd.edu/NACEP/</a>                                    |
| GAUSSIAN<br>PROCESSES        | [15]     | One channel experiments, two sample time course, tested with 4 biological replicates. At least 2 replicates required to build a normally distributed random variable. R-package <code>gprege</code> ; Python code <a href="http://www.inference.phy.cam.ac.uk/os252/projects/GPTwoSample/">http://www.inference.phy.cam.ac.uk/os252/projects/GPTwoSample/</a>                                                          |
| GAUSSIAN<br>PROCESSES        | [16]     | At least 2 replicates required, two channel experiments, one sample time course                                                                                                                                                                                                                                                                                                                                        |
| BATS                         | [17, 18] | Two channel experiments, one sample time course, link to matlab file does not work. Requires at minimum 5–6 time points.                                                                                                                                                                                                                                                                                               |
| METHOD<br>BASED ON PCA       | [19]     | No code or software package provided                                                                                                                                                                                                                                                                                                                                                                                   |
| METHOD<br>BASED ON<br>FPCA   | [23]     | Calculates the dynamics of only one time course. Strong deformation of original time courses, time expensive (>1.5h) and requires the same time-point sampling for both conditions. To compare two time courses one has to subtract one from the other. Applied on data sets for changes in immune system over days. Code not accessible anymore.                                                                      |

|                                                                       |          |                                                                                                                      |
|-----------------------------------------------------------------------|----------|----------------------------------------------------------------------------------------------------------------------|
| <b>SLIDING WINDOW MEASURING DISTANCES OR AREAS BETWEEN THE CURVES</b> | [4]      | Requires equidistant time sampling                                                                                   |
|                                                                       | [26, 27] | Useful but problems with gaps or with time courses sampled on different time points. Does not make full use of data. |

## Method comparison: Top 100 expected genes

We used the number of publications in PubMed that contain the term epidermal growth factor and the gene name of interest as a criterion for expected genes and list in Table S2 the related detection ranking for the methods: TTCA, EDGE, Limma and MaSigPro. Empty fields represent not detected genes.

Table S2: We applied TTCA, EDGE, Limma and MaSigPro to our EGF data set and display the resulting ranking. We searched the number of publications in PubMed that include EGF and the gene name. Genes with the most publications with respect to EGF are ranked high.

| PubMed | gene_name | TTCA_rank | EDGE_rank | Limma_rank | MaSigPro_rank | probeset_id |
|--------|-----------|-----------|-----------|------------|---------------|-------------|
| 7167   | JUN       | 5         | 16250     |            |               | 16687875    |
| 1437   | MET       | 79        | 1241      |            |               | 17050591    |
| 997    | MYC       | 37        | 24427     |            |               | 17072669    |
| 922    | FOS       | 7         | 10672     |            |               | 16786587    |
| 903    | TGFB1     | 51        | 3713      | 105        |               | 16872551    |
| 885    | HBEGF     | 12        | 11792     |            |               | 17000724    |
| 818    | PTGS2     | 4         | 2453      | 86         | 196           | 16697370    |
| 746    | MKI67     | 22        | 564       | 1140       |               | 16719515    |
| 590    | PCNA      | 21        | 4410      | 1343       |               | 16916958    |
| 569    | AREG      | 8         | 5126      | 16         | 129           | 16967863    |
| 445    | GAN       | 142       | 15241     |            |               | 16821280    |
| 341    | CD44      | 73        | 6444      | 1518       | 146           | 16723614    |
| 283    | NRG1      | 141       | 29357     |            |               | 17067696    |
| 237    | BRCA1     | 92        | 8087      |            |               | 16845349    |
| 230    | CEACAM5   | 71        | 613       |            |               | 16862548    |
| 225    | EREG      | 63        | 4484      | 753        |               | 16967843    |
| 192    | HIF1A     | 38        | 11595     |            |               | 16785083    |
| 191    | BDNF      | 131       | 2829      |            |               | 16736861    |
| 127    | ICAM1     | 103       | 25776     |            |               | 16858137    |
| 124    | TGFB2     | 48        | 1560      | 62         | 392           | 16677556    |
| 121    | CCL2      | 64        | 25231     | 1023       |               | 16833204    |
| 121    | CP        | 119       | 4491      | 650        |               | 16960304    |
| 108    | SOX2      | 86        | 7338      |            |               | 16948461    |
| 106    | EGR1      | 2         | 14805     |            |               | 16989736    |
| 103    | ROS1      | 35        | 13575     |            | 67            | 17022996    |
| 96     | CISH      | 185       | 7406      |            | 410           | 16954567    |
| 93     | THBS1     | 39        | 7903      |            |               | 16799315    |
| 85     | KDR       | 109       | 5070      | 1334       |               | 16976029    |
| 79     | MFGE8     | 154       | 11766     |            |               | 16813038    |

|    |          |     |       |      |     |          |
|----|----------|-----|-------|------|-----|----------|
| 76 | CTGF     | 1   | 11236 |      |     | 17023646 |
| 72 | F3       | 16  | 10002 | 355  |     | 16689869 |
| 64 | NMB      | 156 | 7684  | 1112 | 274 | 16812824 |
| 55 | JUNB     | 52  | 15123 |      |     | 16858710 |
| 54 | E2F1     | 58  | 12543 |      |     | 16918445 |
| 53 | BMP2     | 90  | 11852 |      |     | 16911261 |
| 53 | ADRB2    | 65  | 13949 |      |     | 16990848 |
| 50 | TOP2A    | 66  | 144   | 426  |     | 16844312 |
| 48 | IL8      | 19  | 9793  |      |     | 16967771 |
| 47 | MAP2K2   | 183 | 12383 |      |     | 16867240 |
| 45 | SOX9     | 223 | 22003 | 1386 |     | 16837418 |
| 45 | TP63     | 102 | 485   | 1280 |     | 16949537 |
| 45 | EBP      | 114 | 10044 | 369  |     | 17103327 |
| 44 | EPHA2    | 98  | 12174 | 1438 |     | 16682098 |
| 43 | LGALS3   | 173 | 10906 |      |     | 16784381 |
| 40 | GRB7     | 139 | 3796  |      |     | 16833876 |
| 40 | DUSP1    | 11  | 15020 |      |     | 17002846 |
| 39 | CDK1     | 81  | 3721  |      |     | 16705159 |
| 39 | HAS2     | 50  | 15079 |      |     | 17080648 |
| 39 | ABO      | 59  | 4762  | 920  | 198 | 17099463 |
| 38 | ILK      | 229 | 8285  |      |     | 16721479 |
| 38 | UBC      | 53  | 11630 |      |     | 16758874 |
| 38 | UBC      | 243 | 12587 |      |     | 16772172 |
| 33 | RAD51    | 93  | 10533 | 777  |     | 16799637 |
| 32 | NCL      | 267 | 26216 |      |     | 16909491 |
| 28 | VGFB     | 214 | 8998  | 1590 |     | 17060824 |
| 27 | NOS3     | 180 | 1866  | 15   | 359 | 17053455 |
| 26 | ERRFI1   | 70  | 7675  | 719  | 145 | 16681304 |
| 26 | MCL1     | 97  | 12058 |      |     | 16692775 |
| 26 | PTHLH    | 286 | 12188 |      |     | 16762661 |
| 24 | IL18     | 220 | 7106  |      |     | 16744415 |
| 24 | CD274    | 17  | 8474  |      |     | 17083357 |
| 23 | IGFBP4   | 343 | 258   | 1519 |     | 16834091 |
| 23 | SRF      | 202 | 21758 |      |     | 17008856 |
| 22 | SIRT1    | 282 | 11208 | 866  |     | 16705313 |
| 22 | H2AFX    | 293 | 15445 |      |     | 16745236 |
| 22 | DUSP6    | 44  | 4517  |      | 397 | 16768297 |
| 21 | VCAN     | 393 | 11351 |      |     | 16986913 |
| 20 | ID1      | 200 | 5973  | 435  |     | 16912362 |
| 20 | CDC25A   | 56  | 5195  |      |     | 16953279 |
| 19 | SERPINE1 | 30  | 6553  | 13   |     | 17049676 |
| 18 | LAMC2    | 77  | 2791  |      |     | 16674845 |
| 17 | CLDN1    | 10  | 20284 | 14   | 250 | 16962661 |
| 17 | LIFR     | 254 | 4114  |      |     | 16995500 |
| 16 | CYR61    | 9   | 15420 |      |     | 16666738 |
| 16 | ADORA1   | 377 | 3014  |      |     | 16676130 |

|    |        |     |       |      |     |          |
|----|--------|-----|-------|------|-----|----------|
| 16 | NR4A1  | 78  | 11734 |      |     | 16751438 |
| 16 | JAG1   | 355 | 8034  | 693  |     | 16917183 |
| 15 | SRM    | 124 | 18977 |      |     | 16681611 |
| 15 | DKK1   | 128 | 19353 | 870  |     | 16705011 |
| 15 | TYMS   | 68  | 184   |      |     | 16850477 |
| 15 | DNER   | 291 | 3733  |      |     | 16909319 |
| 15 | PDGFA  | 302 | 14713 |      |     | 17054243 |
| 14 | PDCD4  | 278 | 1342  | 1073 |     | 16709201 |
| 14 | FOSB   | 106 | 10748 |      |     | 16863287 |
| 14 | PTGER4 | 46  | 12152 |      |     | 16984287 |
| 13 | ZFP36  | 84  | 13967 |      |     | 16861997 |
| 13 | PTGER1 | 542 | 16825 |      |     | 16869639 |
| 12 | LRP5   | 158 | 23536 | 1313 | 16  | 16728066 |
| 12 | LGALS1 | 368 | 10134 |      |     | 16929855 |
| 11 | PLK1   | 134 | 3104  |      |     | 16817017 |
| 11 | SPRY4  | 181 | 15569 |      |     | 17001063 |
| 10 | SFN    | 429 | 14669 |      |     | 16661314 |
| 10 | RHOG   | 535 | 17467 |      |     | 16734744 |
| 10 | BLM    | 322 | 2494  |      |     | 16804902 |
| 10 | CCNE1  | 550 | 17278 |      |     | 16860418 |
| 10 | VASP   | 171 | 23771 | 93   |     | 16863307 |
| 10 | SNX5   | 26  | 4693  |      | 390 | 16917504 |
| 10 | SPRY1  | 61  | 13025 | 166  |     | 16970435 |
| 10 | LIMK1  | 682 | 26975 |      |     | 17047045 |
| 10 | SNAI2  | 25  | 22004 |      |     | 17077004 |

## Method comparison: Top ranked genes

We display in Table S3 the top ranked gene names for the EGF stimulated data set.

Table S3: Method comparison of TTCA, EDGE, Limma and MaSigPro, showing the top 100 ranked genes.

| Ran<br>k | TTCA    | EDGE                   | LIMMA     | MaSigPro  |
|----------|---------|------------------------|-----------|-----------|
| 1        | CTGF    | OTTHUMG00000166<br>293 | VTCN1     | LINC00685 |
| 2        | EGR1    | TMEM50B                | TMEM156   | LINC00685 |
| 3        | SNORA11 | CEP55                  | LOC646862 | FMNL2     |
| 4        | PTGS2   | LINC00888              | ENTPD3    | DNAH2     |
| 5        | JUN     | ENTPD3                 | ATG9B     | HIST2H2BF |
| 6        | GLIPR1  | MARCH3                 | TP53INP1  | DPP3      |
| 7        | FOS     | OTTHUMG00000015<br>981 | ANGPTL4   | HMGB3     |
| 8        | AREG    | PCDHB14                | HIST2H2BF | PLLP      |
| 9        | CYR61   | HCFC2                  | TMPRSS11E | DSC2      |
| 10       | CLDN1   | NKX6-1                 | OGFRL1    | CPEB2     |
| 11       | DUSP1   | KIAA1239               | ANKRD29   | TRIB3     |

|    |                        |                        |                        |                        |
|----|------------------------|------------------------|------------------------|------------------------|
| 12 | HBEGF                  | TMPRSS11E              | OTTHUMG00000159<br>060 | ENDOD1                 |
| 13 | TMPRSS11E              | IFNG-AS1               | SERPINE1               | SNORD105B              |
| 14 | MIR4320                | OTTHUMG00000152<br>758 | CLDN1                  | ERV3-1                 |
| 15 | CEACAM6                | NUSAP1                 | NOS3                   | AIM2                   |
| 16 | F3                     | ANKRD29                | AREG                   | LRP5                   |
| 17 | CD274                  | MIR4532                | NREP                   | SLC1A4                 |
| 18 | MCM2                   | SNX2                   | MIR205                 | DES12                  |
| 19 | IL8                    | CD53                   | PLEKHS1                | MGAT4A                 |
| 20 | EGR2                   | COLGALT1               | NT5E                   | CNN3                   |
| 21 | PCNA                   | LOC440040              | ANKRD36                | TP53INP1               |
| 22 | MKI67                  | ZNF607                 | DOCK11                 | KMO                    |
| 23 | EDN1                   | ATG9B                  | THSD7A                 | C19orf82               |
| 24 | EXO1                   | NGEF                   | PTRF                   | LCP1                   |
| 25 | SNAI2                  | ERV3-1                 | ERV3-1                 | IL1RL1                 |
| 26 | SNX5                   | DISC2                  | OTTHUMG00000154<br>884 | ICMT                   |
| 27 | ENTPD3                 | OTTHUMG00000154<br>884 | CLCF1                  | EEF1B2                 |
| 28 | SNORA38B               | MICA                   | OTTHUMG00000172<br>590 | NBAS                   |
| 29 | DUSP5                  | ARHGAP11A              | ACO1                   | FOXM1                  |
| 30 | SERPINE1               | OR52K1                 | MYBL2                  | CATSPERB               |
| 31 | TNFAIP3                | NTSR2                  | ARHGEF38               | ISOC2                  |
| 32 | GBP2                   | C15orf60               | MIR4742                | GSDMB                  |
| 33 | MCM3                   | C11orf63               | GGT8P                  | ARAP2                  |
| 34 | NR4A3                  | AURKB                  | TRMT61A                | ORAI3                  |
| 35 | ROS1                   | TMEM156                | CXCL17                 | ARHGAP5-AS1            |
| 36 | SCARNA4                | OTTHUMG00000002<br>945 | C1orf210               | TRIM55                 |
| 37 | MYC                    | BEND3P3                | SNORD59B               | LMF1                   |
| 38 | HIF1A                  | TTK                    | ITGA2                  | TXNRD1                 |
| 39 | THBS1                  | DEPDC1                 | SUOX                   | ACLY                   |
| 40 | NAPSA                  | OTTHUMG00000161<br>058 | CDKN3                  | POLA2                  |
| 41 | GBP1                   | CST11                  | FYB                    | SEMA3B                 |
| 42 | NAMPT                  | ABCA12                 | STEAP4                 | RAI1                   |
| 43 | MIR554                 | SAC3D1                 | LOC100128822           | OTTHUMG00000169<br>663 |
| 44 | DUSP6                  | ASPM                   | UNC13B                 | PPM1K                  |
| 45 | IL24                   | PLEKHA6                | SNORA64                | CTNBL1                 |
| 46 | PTGER4                 | PLEK2                  | CEACAM6                | CTSZ                   |
| 47 | OTTHUMG00000171<br>410 | OTTHUMG00000178<br>553 | SQRDL                  | HMGCS1                 |
| 48 | TGFB2                  | MUC5B                  | SNHG15                 | ASNS                   |

|    |                        |                        |                        |              |
|----|------------------------|------------------------|------------------------|--------------|
| 49 | OTTHUMG00000018<br>491 | ZNF549                 | RPSAP52                | VCL          |
| 50 | HAS2                   | OTTHUMG00000156<br>146 | ENO1                   | HS2ST1       |
| 51 | TGFB1                  | FAM9C                  | AREGB                  | AQP11        |
| 52 | JUNB                   | SLC27A2                | SPTLC3                 | REPIN1       |
| 53 | UBC                    | PIK3IP1                | PHLDA3                 | AKTIP        |
| 54 | MYBL2                  | AHCYL2                 | KANK2                  | NPPA         |
| 55 | GINS4                  | LOC399715              | OTTHUMG00000168<br>899 | HBS1L        |
| 56 | CDC25A                 | CD68                   | OTTHUMG00000169<br>612 | ITGA2        |
| 57 | DHRS3                  | BATF3                  | KLHL5                  | TMEM50B      |
| 58 | E2F1                   | OTTHUMG00000018<br>047 | HLA-DRA                | CHST14       |
| 59 | ABO                    | PRDM11                 | NDUFA5                 | PPP2R3A      |
| 60 | ANGPTL4                | PXMP2                  | KLHDC2                 | JDP2         |
| 61 | SPRY1                  | MICB                   | LOC652993              | LOC100506636 |
| 62 | SEMA7A                 | MICB                   | TGFB2                  | ZNF554       |
| 63 | EREG                   | MUC20                  | KRTAP2-3               | DBNDD1       |
| 64 | CCL2                   | KLHL6-AS1              | TNKS2-AS1              | ZNF493       |
| 65 | ADRB2                  | FREM2-AS1              | ANKRD33                | S100A10      |
| 66 | TOP2A                  | C17orf53               | OTTHUMG00000170<br>592 | FLJ39739     |
| 67 | PDLIM5                 | KRT17                  | DOLPP1                 | ROS1         |
| 68 | TYMS                   | SNORA24                | TMEM158                | ZNF117       |
| 69 | MT1X                   | GLUD1P2                | FBLL1                  | LOC731275    |
| 70 | ERRF1                  | RNA5SP442              | MIR4461                | TEX10        |
| 71 | CEACAM5                | SLC25A5-AS1            | SLC11A2                | WFDC10B      |
| 72 | TMEM156                | OR7G2                  | WHAMMP2                | LOC100130887 |
| 73 | CD44                   | OTTHUMG00000160<br>737 | EEPD1                  | POLM         |
| 74 | LOC100507507           | C3orf27                | ZNF493                 | IGF2R        |
| 75 | KLF10                  | FAM178A                | PPM1H                  | TPGS2        |
| 76 | BLID                   | MRPL42P5               | OSBPL7                 | SLC11A2      |
| 77 | LAMC2                  | HOXD-AS1               | MIR548I1               | MCCC1        |
| 78 | NR4A1                  | MICB                   | ATP13A5                | CDK17        |
| 79 | MET                    | MAFG-AS1               | FYCO1                  | KHNYN        |
| 80 | KLF6                   | ARHGEF38-IT1           | MAZ                    | CCDC134      |
| 81 | CDK1                   | VCY                    | TTL11-IT1              | AFF1         |
| 82 | MCM6                   | VCY                    | ZNF117                 | TRMT6        |
| 83 | CXCL17                 | PAPSS2                 | GPR89A                 | ZNF585A      |

|     |          |                        |                        |          |
|-----|----------|------------------------|------------------------|----------|
| 84  | ZFP36    | OTTHUMG00000164<br>903 | CERS6-AS1              | ARL14    |
| 85  | CPEB2    | SNORD59B               | IQGAP3                 | CHAC1    |
| 86  | SOX2     | TLCD1                  | PTGS2                  | OSBPL9   |
| 87  | TK1      | POU2F3                 | PCDHB13                | CCSAP    |
| 88  | SLCO2A1  | C9orf106               | ACPP                   | TRIQK    |
| 89  | AREGB    | MUC13                  | CROT                   | NAA15    |
| 90  | BMP2     | PNPLA3                 | GPN1                   | MPZL2    |
| 91  | PTRF     | BUB1                   | LOC100128881           | ZHX2     |
| 92  | BRCA1    | ACO1                   | DNAJC14                | SLC6A8   |
| 93  | RAD51    | PSG11                  | VASP                   | FAM151B  |
| 94  | RASA4    | DKFZp566F0947          | FAM50B                 | CASP2    |
| 95  | SNORA74A | FHL1                   | EEF1G                  | SLC2A12  |
| 96  | CDC20    | LOC100506257           | ADHFE1                 | UHRF2    |
| 97  | MCL1     | OTTHUMG00000158<br>558 | GOS2                   | LSS      |
| 98  | EPHA2    | OR7E47P                | OTTHUMG00000164<br>709 | MPZL3    |
| 99  | KRTAP2-3 | LOC100506393           | PATZ1                  | PPP1R13B |
| 100 | NAB2     | LOC100507003           | FAM27E2                | MIR205   |



## Method test: EDGE

EDGE delivered no results with the given experimental design using the most recent method: "optimal discovery procedure". We excluded measurement points that were only sampled for one condition but not for the other, and we averaged the available replicates. We applied the bootstrap approach. The top 10 ranking is shown in Figure S2 and S3. EDGE has problems with the data set, as shown in the conservative p-value distribution in Figure S4, automatically produced by EDGE. The best ranked gene is background noise as measurement values are negative. SCAN pre-processing subtract background noise from original values. EDGE prefers genes with low expression levels, because the variance is then very low as well. In contrast, TTCA removes negative values and takes the effect size into account.

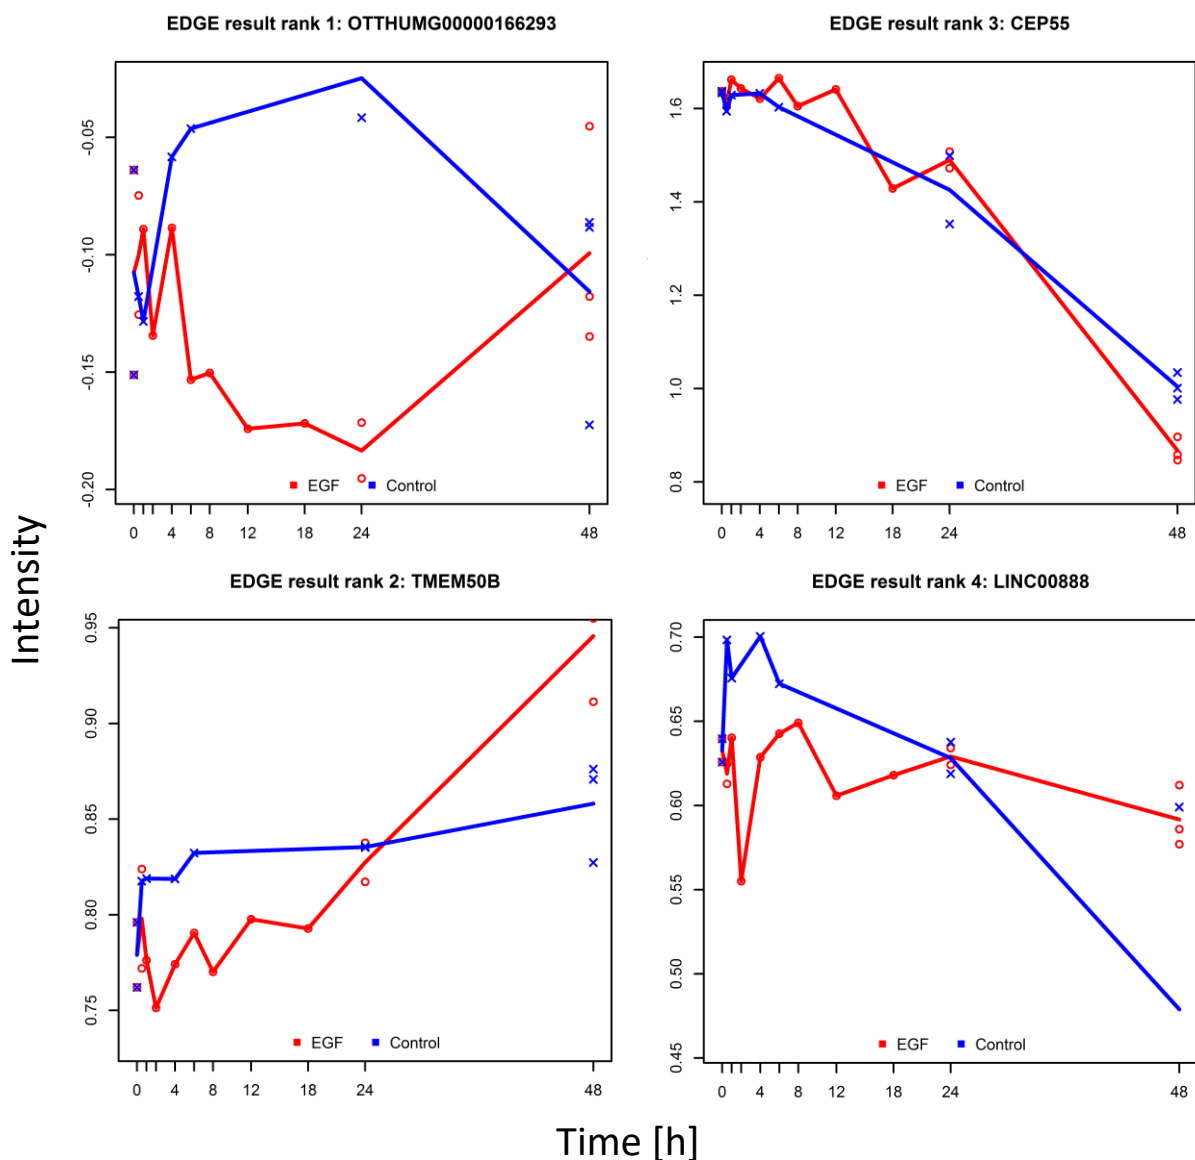

Figure S2: EDGE ranking 1 to 4. Shows gene expression profiles of top selected genes. Points represent measurement data. Solid lines are step wise interpolations of measurement points only for graphical purposes. Red: Stimulation with EGF. Blue: Control.

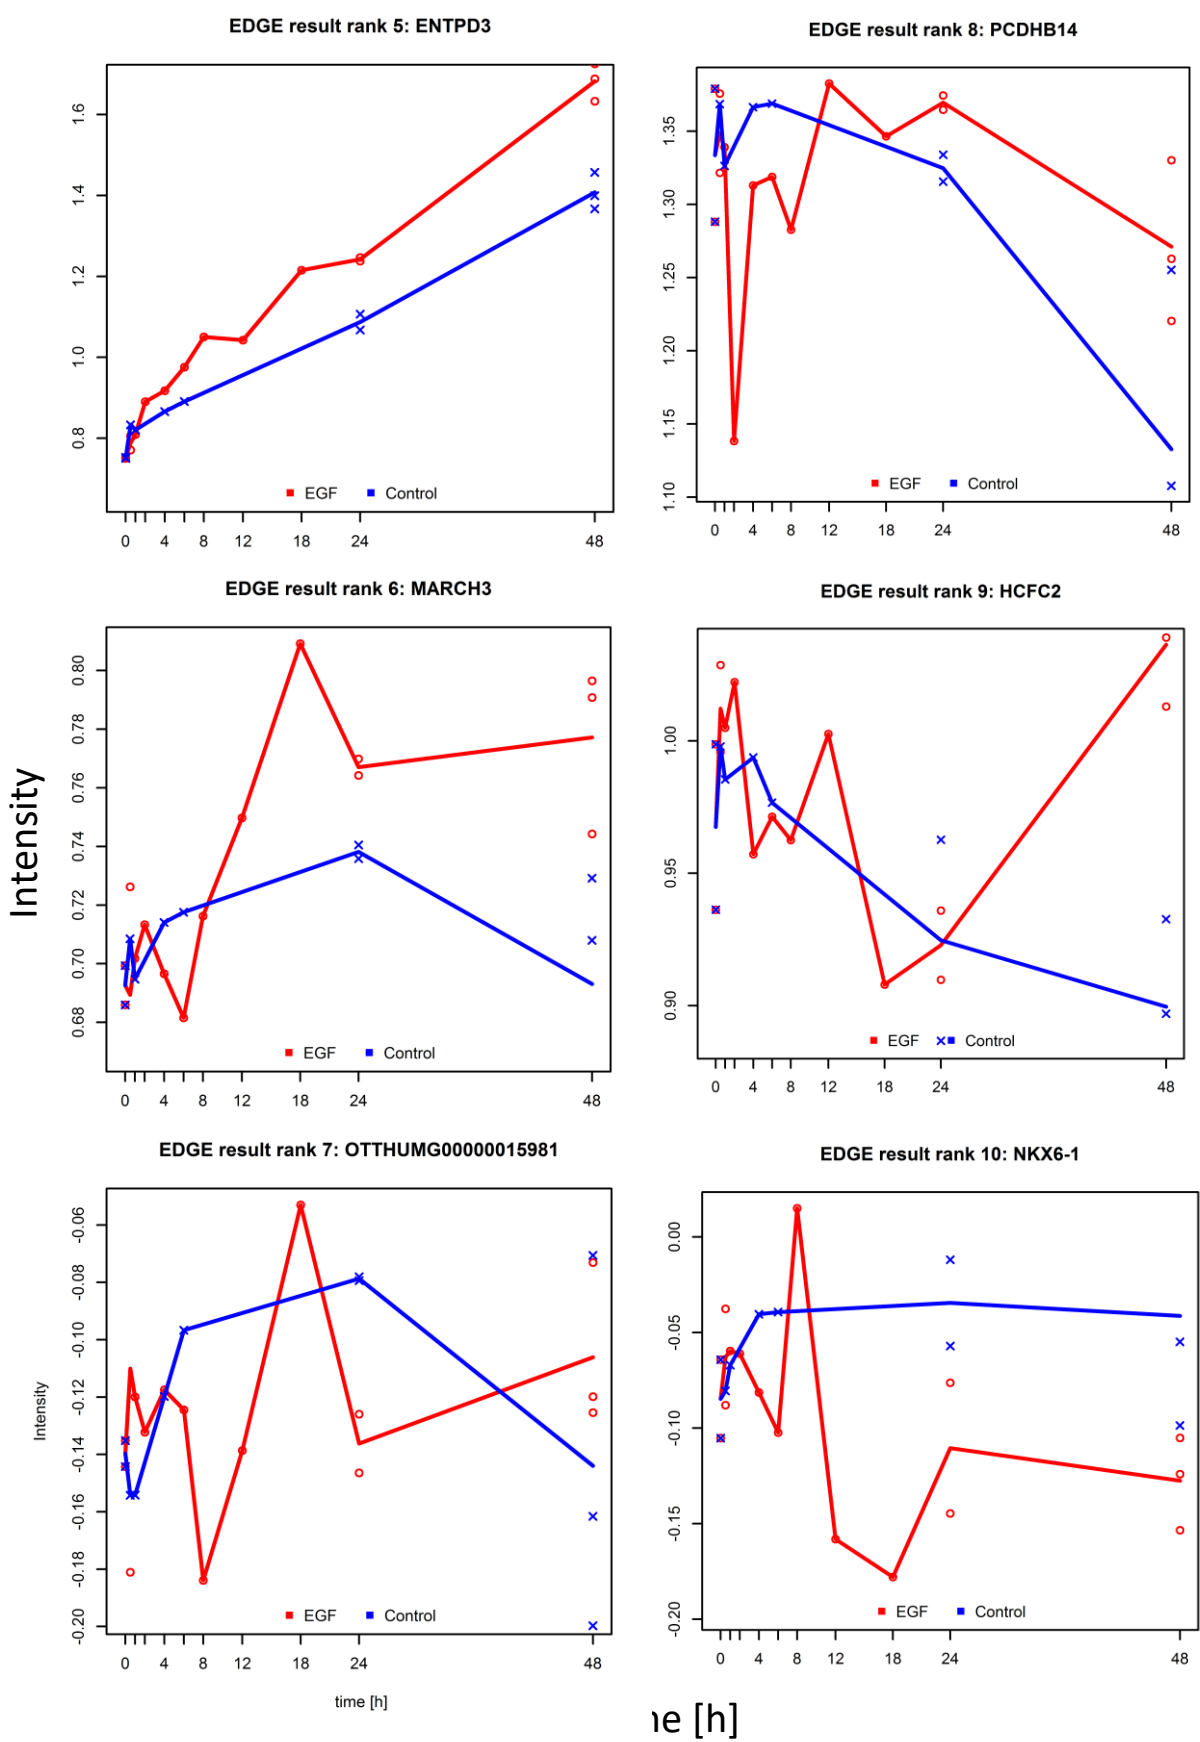

Figure S3: EDGE ranking 5 to 10. Shows gene expression profiles of top selected genes. Points represent measurement data. Solid lines are step wise interpolations of measurement points only for araphical purposes. Red: Stimulation with EGF. Blue: Control.

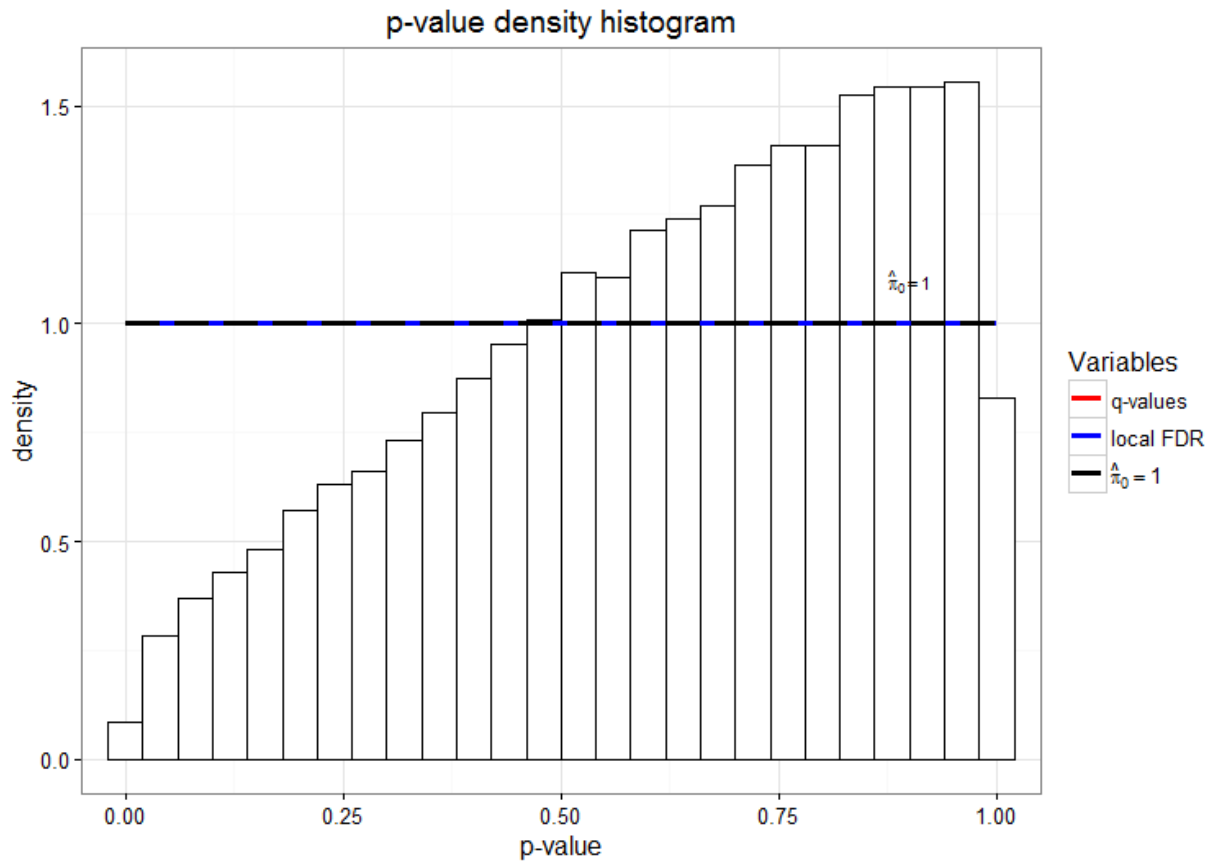

Figure S4: Quality plot provided by EDGE. Red: Below black solid line, all q-values are 1. Conservative p-value distribution

## Method test: Limma

We applied Limma to our data set shown in Figure S5 and S6.

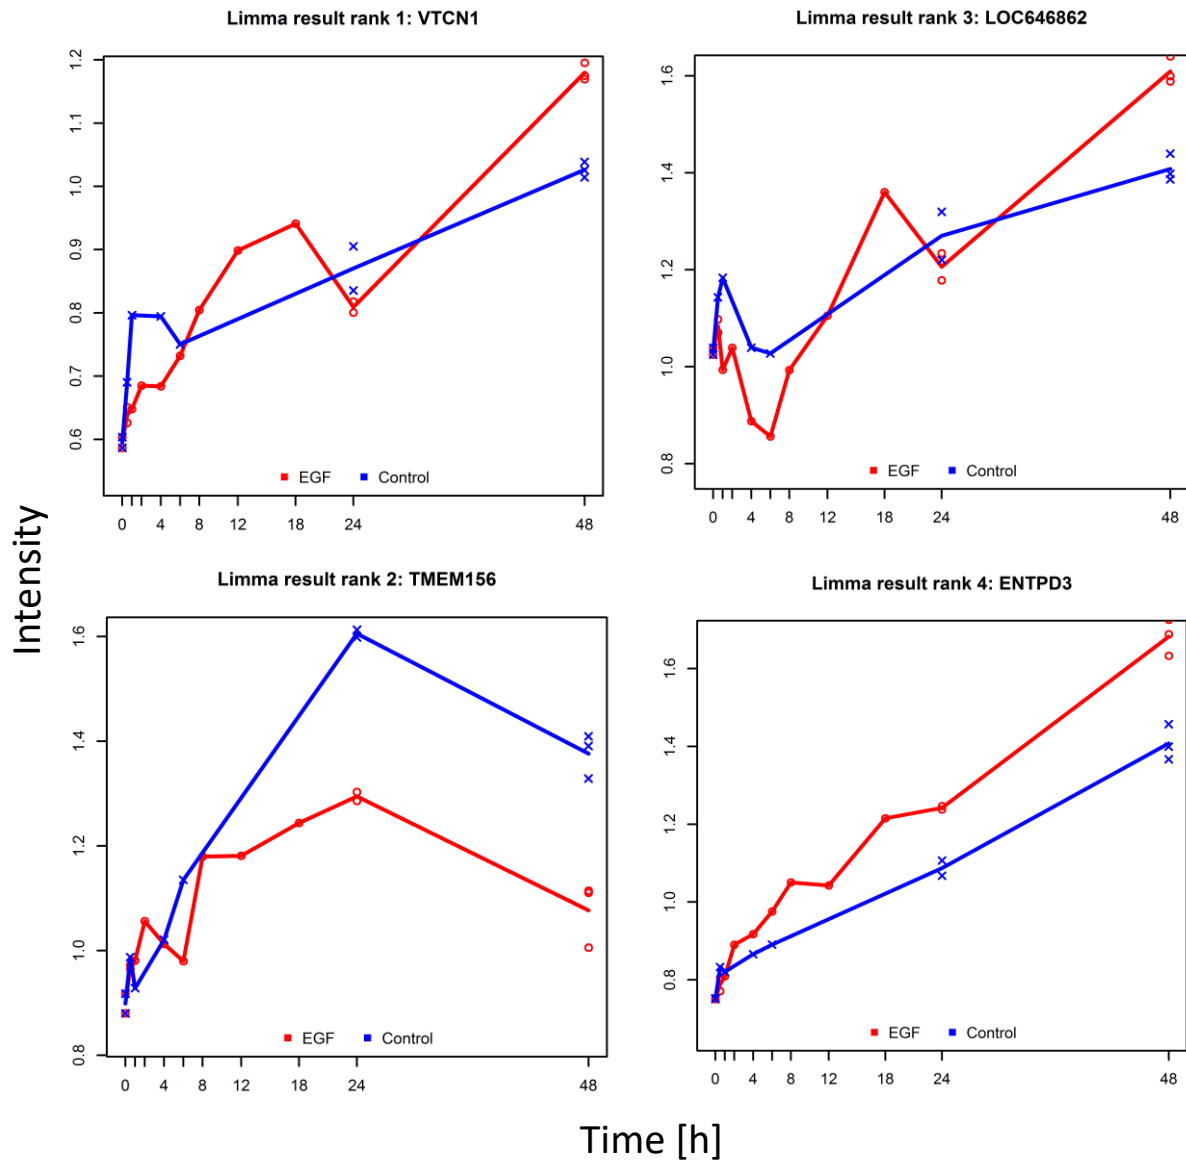

Figure S5: Limma ranking 1 to 4: Shows gene expression profiles of top selected genes. Points represent measurement data. Solid lines are step wise interpolations of measurement points only for graphical purposes. Red: Stimulation with EGF. Blue: Control.

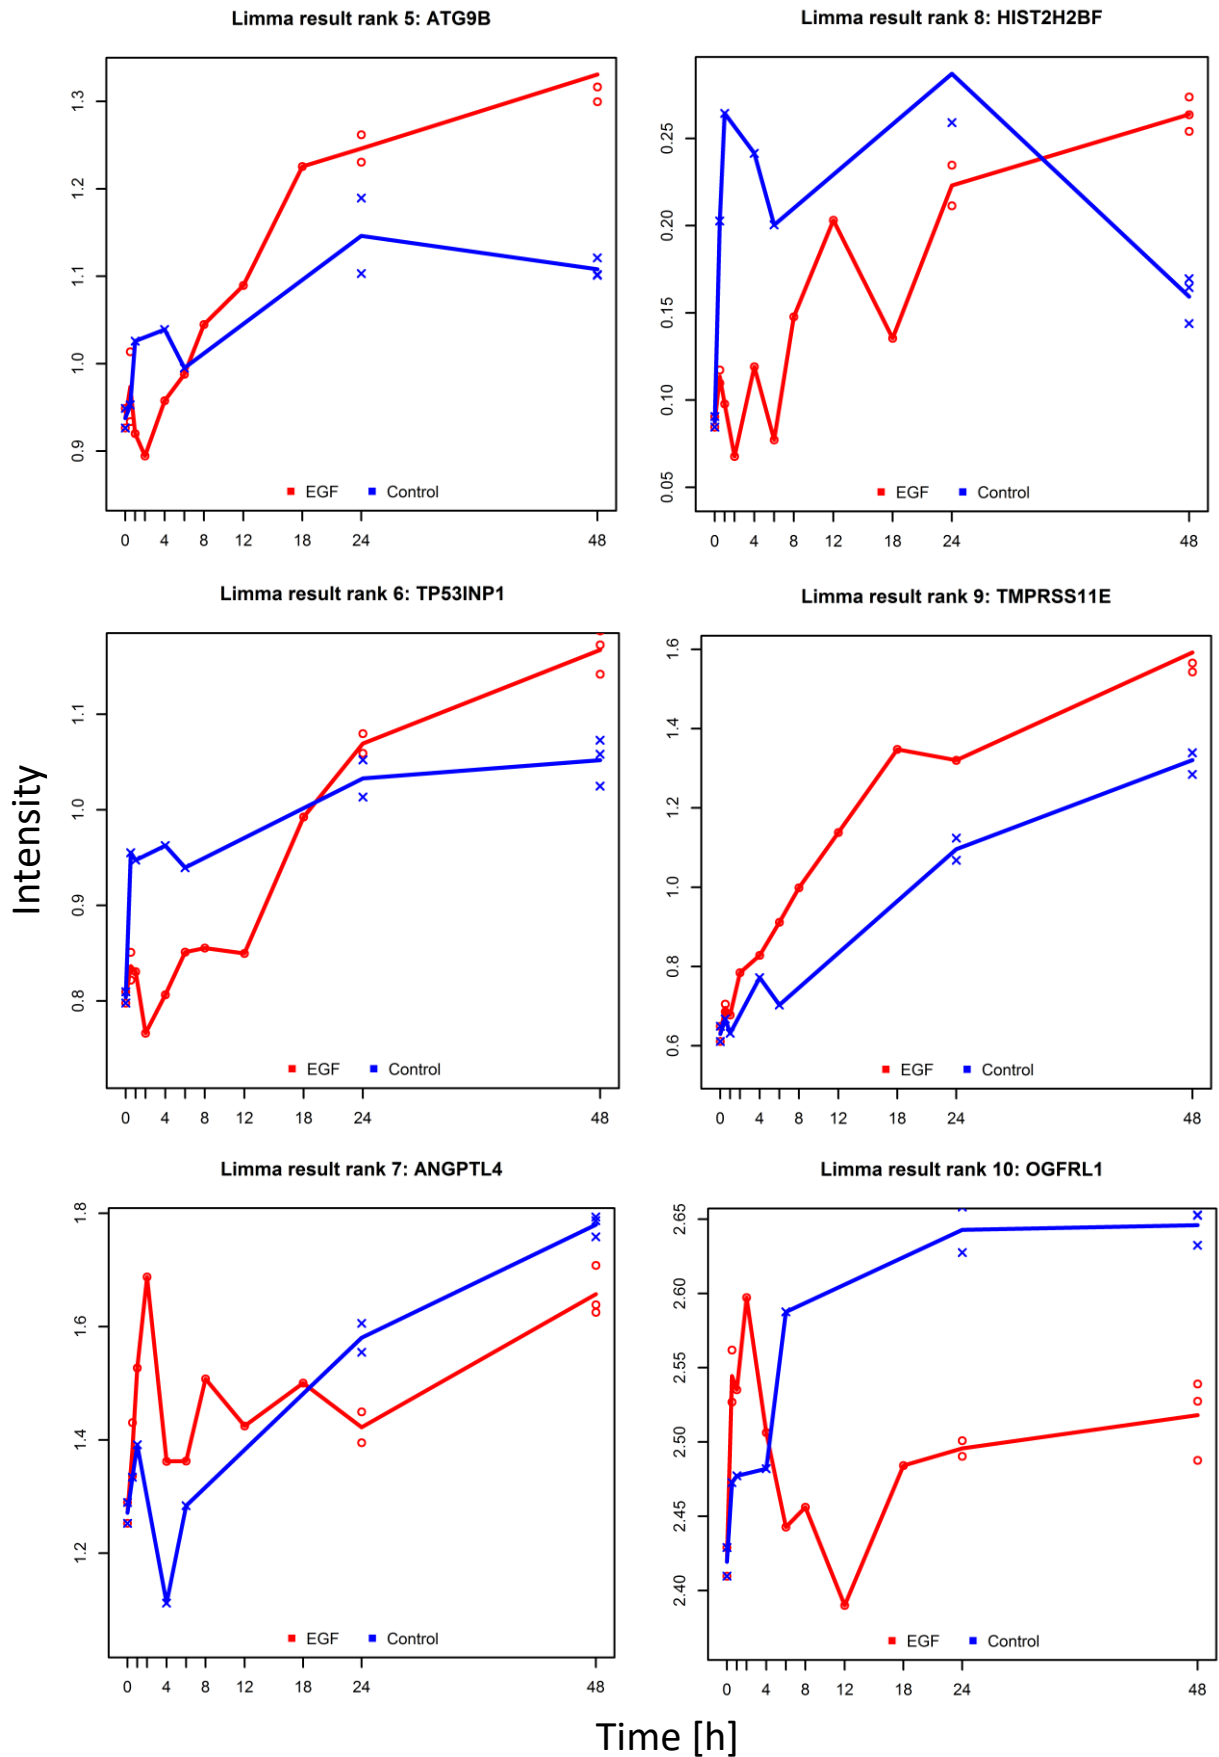

Figure S6: Limma ranking 5 to 10: Shows gene expression profiles of top selected genes. Points represent measurement data. Solid lines are step wise interpolations of measurement points only for graphical purposes. Red: Stimulation with EGF. Blue: Control.

# Method test: MaSigPro

We applied MaSigPro to our data set shown in Figure S7 and S8.

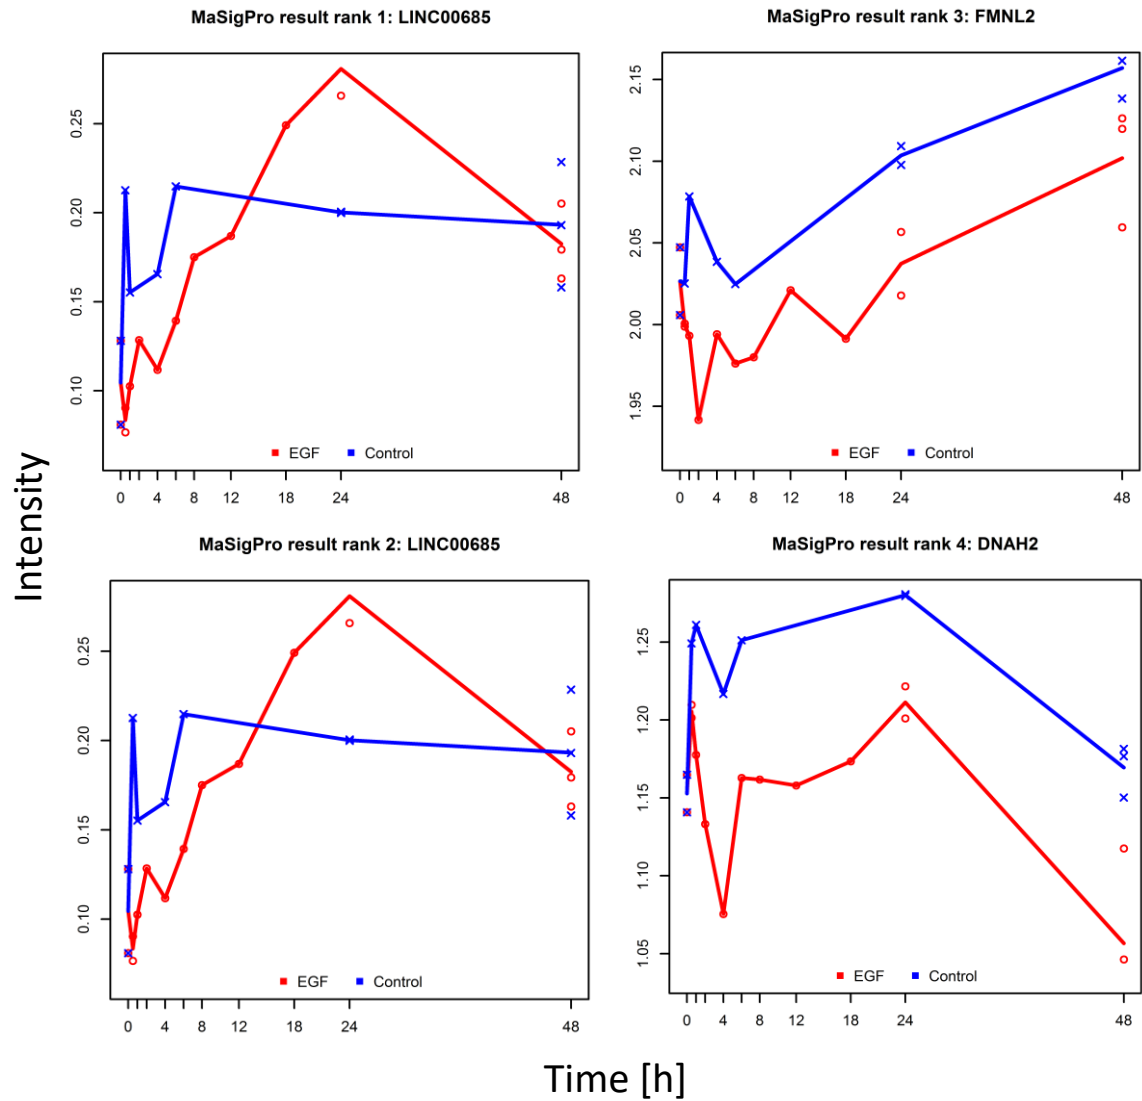

Figure S7: MaSigPro ranking 1 to 4: Shows gene expression profiles of top selected genes. Points represent measurement data. Solid lines are step wise interpolations of measurement points only for graphical purposes. Red: Stimulation with EGF. Blue: Control

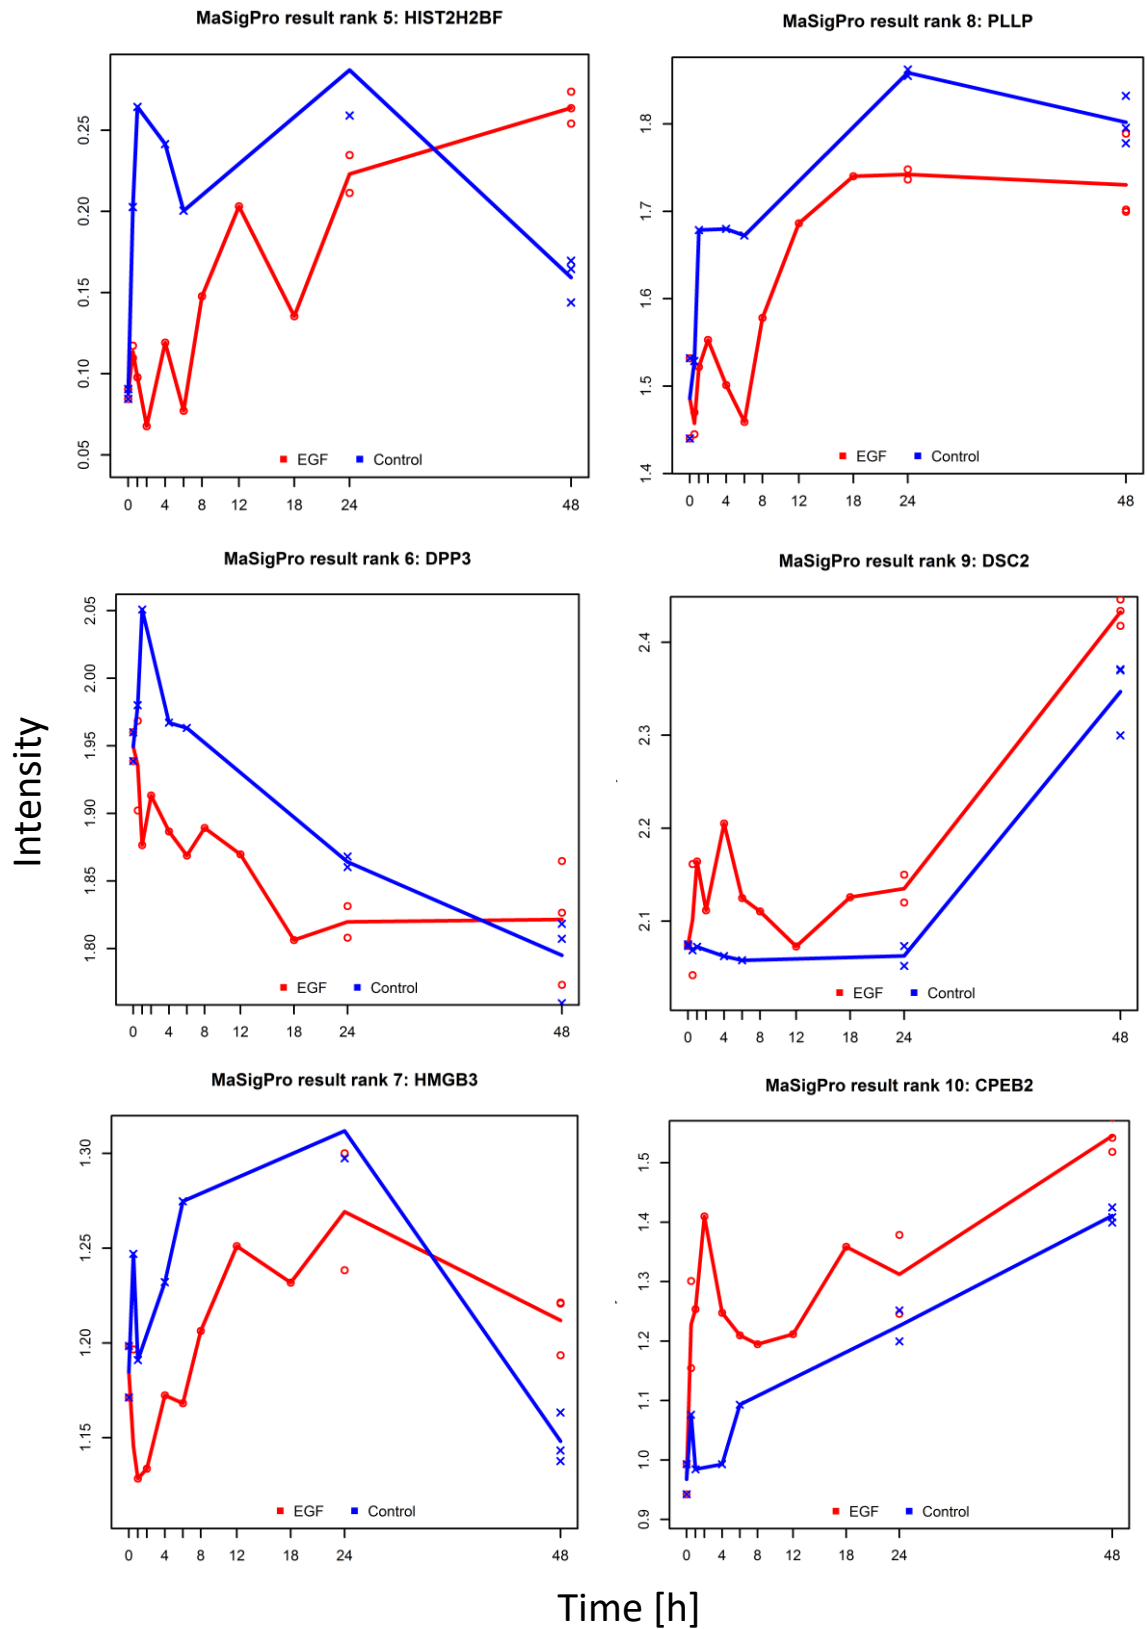

Figure S8: MaSigPro ranking 5 to 10: Shows gene expression profiles of top selected genes. Points represent measurement data. Solid lines are step wise interpolations of measurement points only for graphical purposes. Red: Stimulation with EGF. Blue: Control

# R-Code

```
#####  
### Gene-analysis  
load("C:/Users/Marco  
Albrecht/Documents/CompBioSys/Affymetrix/PreprocessAndQC/Breuhahnexpression_SCAN_NetaffixTranscr_34.RData")  
rownames(resultB)<-resultB[,1]  
#####  
load("C:/Users/Marco Albrecht/Documents/CompBioSys/Affymetrix/PreprocessAndQC/Annotation_Transkript_changed_Netaff.RData")  
annotation<-annotation[,c("probeset_id", "gene_name", "transkript_id", "GO_BP", "GO_CC", "GO_mf")]  
rownames(annotation)<-annotation[,1]  
annotation<-annotation[,-1]  
annot <- resultB[,c("probeset_id", "gene_name")]  
#####  
EGF<-resultB[ ,  
c("B_C_2_0", "B_C_3_0", "B_EGF_1_0.5", "B_EGF_3_0.5", "B_EGF_1_1", "B_EGF_3_2", "B_EGF_1_4", "B_EGF_1_6", "B_EGF_1_8", "B_EGF_2_1  
2", "B_EGF_2_18", "B_EGF_1_24", "B_EGF_3_24", "B_EGF_1_48", "B_EGF_2_48", "B_EGF_3_48")]  
EGF.time <- c(0,0,0.5,0.5,1,2,4,6,8,12,18,24,24,48,48,48)  
BControl<-resultB[ ,  
c("B_C_2_0", "B_C_3_0", "B_C_2_0.5", "B_C_1_1", "B_C_3_4", "B_C_2_6", "B_C_1_24", "B_C_3_24", "B_C_1_48", "B_C_2_48", "B_C_3_48")]  
BControl.time <- c(0,0,0.5,1,4,6,24,24,48,48,48,48)  
#####  
  
#####  
#####  
### TTCA  
#####  
#####  
  
install.packages("tcltk2")  
install.packages("TTCA")  
library("TTCA")  
TTCA(grp1=EGF, grp1.time=EGF.time, grp2=BControl, grp2.time=BControl.time, lambda = 0.6, annot = annot, annotation = "annotation",  
timeInt = c(4,12), pVal = 0.05, codetest = FALSE, file = "C:/Users/Marco Albrecht/Desktop/Pup_Master_MA_V3/method comparison",  
MaxPics = 10000, Stimulus1 = "epidermal+growth+factor",  
Stimulus2 = "", S = "gene", mapGO = "", PeakMode = "norm")  
  
#####  
#####  
### Limma  
#####  
#####  
ptmL <- proc.time()  
#Create an expression set  
library("Biobase")  
colnames(EGF)[1:2]<- c("B_EGF_2_0", "B_EGF_3_0")  
Bind<-cbind(EGF,BControl)  
exprs <- as.matrix(Bind)  
eset <- ExpressionSet(assayData=exprs)  
  
#####  
#source("https://bioconductor.org/biocLite.R")  
#biocLite("limma")  
library("limma")  
library("splines")  
X <- ns(c(EGF.time, BControl.time),df=5)  
Group <- factor(c(rep("EGF", times = length(EGF.time)), rep("Ctrl", times = length(BControl.time))))  
design <- model.matrix(~Group*X)  
fit <- lmFit(eset, design)  
fit <- eBayes(fit)  
TT<-topTable(fit, coef=8:12, number=500000)  
TT<-TT[TT$P.Value<0.05,]  
Result<-merge(TT,annot,by="row.names",all.x=TRUE)  
ResultFin<-Result[,c("gene_name", "P.Value", "adj.P.Val", "probeset_id")]  
ResultFin<-ResultFin[order(ResultFin$P.Value),]
```



```

ResultFin<-ResultFin[complete.cases(ResultFin),]
head(ResultFin)
LimmaTimeConsum<-proc.time() - ptmL
LimmaTimeConsum

for(i in 1:10){
y11<-as.numeric(EGF[ rownames(EGF)==ResultFin$probeset_id[i], ])
x11<-EGF.time
y22<-as.numeric(BControl[ rownames(BControl)==ResultFin$probeset_id[i], ])
x22<-BControl.time

x1<-approx(x11, y11, xout = unique(x11), method = "constant")$x
y1<-approx(x11, y11, xout = unique(x11), method = "constant")$y
x2<-approx(x22, y22, xout = unique(x22), method = "constant")$x
y2<-approx(x22, y22, xout = unique(x22), method = "constant")$y
## Plot
png(filename = paste0("C:/Users/Marco Albrecht/Desktop/Pup_Master_MA_V3/method
comparison/LimmaRank_",as.character(i),".png"),width = 3.25, height = 3.25,units= "in",res = 1200, fontsize = 6)
plot(x1, y1, ylim=c(min(c(y1,y2))-(0.1*(max(c(y1,y2))-min(c(y1,y2))))),max(c(y1,y2),na.rm = TRUE)),type="l",
col="red",lwd=2,ylab="Intensity", xlab=" time [h]", xaxt="n")
points(x11,y11,col="red")
lines(x2, y2,col="blue",lwd=2)
points(x22,y22 ,col="blue",pch=4)
axis(side=1, at=round(unique(x1,y1)))
title(main = list(paste0("Limma result rank ",as.character(i),": ",ResultFin$gene_name[i]), cex = 1.2))
legend('bottom','groups',c("EGF", "Control"), pch=c(15,15),col=c('red',"blue"),ncol=2,bty="n")
dev.off()
}
## end Plot

write.table(ResultFin, "C:/Users/Marco Albrecht/Desktop/Pup_Master_MA_V3/method comparison/RESULT_Limma.txt", sep="\t")
rm(ResultFin)

#####
#####
### EDGE
#####
#####
ptmE <- proc.time()

#source("https://bioconductor.org/biocLite.R")
#biocLite("edge")
library("edge")
library("splines")

# data(endotoxin)
# endoexpr <- endotoxin$endoexpr
# class <- endotoxin$class
# ind <- endotoxin$ind
# time <- endotoxin$time

#because the method doesn't work with gaps and unbalanced replicated data we removed unmatched arrays and averaged the replicates
EGFred<-cbind(as.data.frame(rowMeans(resultB[,c("B_C_2_0","B_C_3_0")], na.rm = TRUE)),
as.data.frame(rowMeans(resultB[,c("B_EGF_1_0.5","B_EGF_3_0.5")], na.rm = TRUE)),
resultB[,c("B_EGF_1_1","B_EGF_1_4","B_EGF_1_6")],
as.data.frame(rowMeans(resultB[,c("B_EGF_1_24","B_EGF_3_24")], na.rm = TRUE)),
as.data.frame(rowMeans(resultB[,c("B_EGF_1_48","B_EGF_2_48","B_EGF_3_48")], na.rm = TRUE))
)
Controlred<-cbind(as.data.frame(rowMeans(resultB[,c("B_C_2_0","B_C_3_0")], na.rm = TRUE)),
resultB[,c("B_C_2_0.5","B_C_1_1","B_C_3_4","B_C_2_6")],
as.data.frame(rowMeans(resultB[,c("B_C_1_24","B_C_3_24")], na.rm = TRUE)),
as.data.frame(rowMeans(resultB[,c("B_C_1_48","B_C_2_48","B_C_3_48")], na.rm = TRUE))
)
Bind<-cbind(EGFred,Controlred)
endoexpr<- as.matrix(Bind)

```

```

colnames(endoexpr) <- NULL
rownames(endoexpr) <- NULL

timeC=c(0,0.5,1,4,6,24,48)
ind<-c(rep(1, times = length(timeC)),rep(2, times = length(timeC)) )
time <-c(timeC,timeC)
class <- factor(c(rep("EGF", times = length(timeC)), rep("Ctrl", times = length(timeC))))

# colnames(EGF)[1:2]<- c("B_EGF_2_0", "B_EGF_3_0")
# Bind<-cbind(EGF,BControl)
# endoexpr<- as.matrix(Bind)
# colnames(endoexpr) <- NULL
# rownames(endoexpr) <- NULL
# head(endoexpr)
# ind<-c(1,2,1,2,1,1,1,1,1,1,1,1,1,2,3,3,4,3,2,2,2,3,4,4,5,6)
# time <-c(EGF.time,BControl.time)
# class <- factor(c(rep("EGF", times = length(EGF.time)), rep("Ctrl", times = length(BControl.time))))
## tried to order the columns to follow the design of the example
# ORD<-order(ind)
# ind<-ind[ORD]
# endoexpr<-endoexpr[,ORD]
# time<-time[ORD]
# class<-class[ORD]

## Possibility 1
#cov <- data.frame(ind = ind, tme = time, grp = class)
#null_model <- ~grp + ns(tme, df = 2, intercept = FALSE)
#null_model <- ~grp + ns(tme, df = 2, intercept = FALSE) + (grp):ns(tme, df = 2, intercept = FALSE)
#de_obj <- build_models(data = endoexpr, cov = cov, full.model = null_model, null.model = null_model)
## Possibility 2
de_obj <- build_study(data = endoexpr, grp = class, tme = time, ind = ind, sampling = "timecourse")

slotNames(de_obj)
gibexpr <- exprs(de_obj)
head(gibexpr)
cov <- pData(de_obj)
cov

ef_obj <- fit_models(de_obj, stat.type = "lrt")

head(betaCoef(ef_obj))

alt_res <- resFull(ef_obj)
head(alt_res)
null_res <- resNull(ef_obj)
head(null_res)

alt_fitted <- fitFull(ef_obj)
head(alt_fitted)
null_fitted <- fitNull(ef_obj)
head(null_fitted)

#de_lrt <- lrt(de_obj, nullDistn = "normal")
de_lrt <- lrt(de_obj, nullDistn = "bootstrap")
#### "Error with optimal discovery procedure" leads to error
#de_odp <- odp(de_obj, bs.its = 50, verbose = TRUE, n.mods = 50)

summary(de_lrt)

sig_results <- qvalueObj(de_lrt)
names(sig_results)

hist(sig_results)

```

```

pvalues <- sig_results$pvalues
qvalues <- sig_results$qvalues
lfdr <- sig_results$lfdr
pi0 <- sig_results$pi0

qvalues[2]

fdr.level <- 0.1
sigGenes <- qvalues < fdr.level

EDGEres<-as.data.frame(cbind(pvalues,qvalues))
rownames(EDGEres)<-rownames(EGF)

Result<-merge(EDGEres,annot,by="row.names",all.x=TRUE)
ResultFin<-Result[,c("gene_name", "pvalues", "qvalues", "probeset_id")]
ResultFin<-ResultFin[order(ResultFin$pvalues),]
ResultFin<-ResultFin[complete.cases(ResultFin),]
head(ResultFin)
EDGETimeConsum<-proc.time() - ptmE
EDGETimeConsum
for(i in 1:10){
  y11<-as.numeric(EGF[ rownames(EGF)==ResultFin$probeset_id[i], ])
  x11<-EGF.time
  y22<-as.numeric(BControl[ rownames(BControl)==ResultFin$probeset_id[i], ])
  x22<-BControl.time

  x1<-approx(x11, y11, xout = unique(x11), method = "constant")$x
  y1<-approx(x11, y11, xout = unique(x11), method = "constant")$y

  x2<-approx(x22, y22, xout = unique(x22), method = "constant")$x
  y2<-approx(x22, y22, xout = unique(x22), method = "constant")$y
  ## Plot
  png(filename = paste0("C:/Users/Marco Albrecht/Desktop/Pup_Master_MA_V3/method
comparison/EDGERank_",as.character(i),".png"),width = 3.25, height = 3.25,units= "in",res = 1200, pointsize = 6)
  plot(x1, y1, ylim=c(min(c(y1,y2))-(0.1*(max(c(y1,y2))-min(c(y1,y2)))),max(c(y1,y2),na.rm = TRUE)),type="l",
col="red",lwd=2,ylab="Intensity", xlab=" time [h]", xaxt="n")
  points(x11,y11,col="red")
  lines(x2, y2,col="blue",lwd=2)
  points(x22,y22 ,col="blue",pch=4)
  axis(side=1, at=round(unique(x1,y1)))
  title(main = list(paste0("EDGE result rank ",as.character(i),": ",ResultFin$gene_name[i]), cex = 1.2))
  legend('bottom',groups',c("EGF", "Control"), pch=c(15,15),col=c('red',"blue"),ncol=2,bty="n")
  dev.off()
}

write.table(ResultFin, "C:/Users/Marco Albrecht/Desktop/Pup_Master_MA_V3/method comparison/RESULT_EDGE.txt", sep="\t")
rm(ResultFin)
#####
#####
### MaSigPro
#####
#####
ptmM <- proc.time()

library("Biobase")
colnames(EGF)[1:2]<- c("B_EGF_2_0", "B_EGF_3_0")
Bind<-cbind(BControl,EGF)
exprs <- as.matrix(Bind)

colnames(EGF)[1:2]<- c("B_EGF_2_0", "B_EGF_3_0")
M<-as.data.frame(cbind(c(BControl.time,EGF.time),

```

```

c(1,1,2,3,4,5,6,6,7,7,7,8,8,9,9,10,11,12,13,14,15,16,17,17,18,18,18),
c(rep(1, 11), rep(0, 16) ),
c(rep(0, 11), rep(1, 16) ))
colnames(M)<-c("Time", "Replicate", "control", "EGF")
rownames(M)<-c(colnames(BControl),colnames(EGF))

#source("https://bioconductor.org/biocLite.R")
#biocLite("maSigPro")
library("maSigPro")
#maSigProUsersGuide()

design <- make.design.matrix(M, degree = 2)

design$groups.vector

fit <- p.vector(exprs, design, Q = 0.05, MT.adjust = "BH", min.obs = 20)

fit$i # returns the number of significant genes
fit$alfa # gives p-value at the Q false discovery control level
fit$SELEC # is a matrix with the significant genes and their expression values

tstep <- T.fit(fit, step.method = "backward", alfa = 0.05)

sigs <- get.siggenes(tstep, rsq = 0.6, vars = "groups")

N<-sigs$sig.genes$EGFvscontrol$sig.pvalues
head(N)

Result<-merge(N[, c("p-value", "p.valor_EGFvscontrol")],annot,by="row.names",all.x=TRUE)
ResultFin<-Result[,c("gene_name", "p-value", "p.valor_EGFvscontrol","probeset_id")]
ResultFin<-ResultFin[order(ResultFin$p.valor_EGFvscontrol),]
ResultFin<-ResultFin[complete.cases(ResultFin),]
head(ResultFin)

MaSigProTimeConsum<-proc.time() - ptmM
MaSigProTimeConsum
for(i in 1:10){
  y11<-as.numeric(EGF[ rownames(EGF)==ResultFin$probeset_id[i], ])
  x11<-EGF.time
  y22<-as.numeric(BControl[ rownames(BControl)==ResultFin$probeset_id[i], ])
  x22<-BControl.time

  x1<-approx(x11, y11, xout = unique(x11), method = "constant")$x
  y1<-approx(x11, y11, xout = unique(x11), method = "constant")$y

  x2<-approx(x22, y22, xout = unique(x22), method = "constant")$x
  y2<-approx(x22, y22, xout = unique(x22), method = "constant")$y
  ## Plot
  png(filename = paste0("C:/Users/Marco Albrecht/Desktop/Pup_Master_MA_V3/method
comparison/MaSigPro_EGFvsCon_Rank_",as.character(i),".png"),width = 3.25, height = 3.25,units= "in",res = 1200, pointsize = 6)
  plot(x1, y1, ylim=c(min(c(y1,y2))-(0.1*(max(c(y1,y2))-min(c(y1,y2))))),max(c(y1,y2),na.rm = TRUE)),type="l",
col="red",lwd=2,ylab="Intensity", xlab=" time [h]", xaxt="n")
  points(x11,y11,col="red")
  lines(x2, y2,col="blue",lwd=2)
  points(x22,y22 ,col="blue",pch=4)
  axis(side=1, at=round(unique(x1,y1)))
  title(main = list(paste0("Limma result rank ",as.character(i),": ",ResultFin$gene_name[i]), cex = 1.2))
  legend("bottom",groups,c("EGF", "Control"), pch=c(15,15),col=c("red","blue"),ncol=2,bty="n")
  dev.off()
}

```

```

write.table(ResultFin, "C:/Users/Marco Albrecht/Desktop/Pup_Master_MA_V3/method comparison/RESULT_MaSigPro_EGFvsCon.txt",
sep="\t")

Result<-merge(N[, c("p-value", "p.valor_EGFvscontrol")],annot,by="row.names",all.x=TRUE)
ResultFin<-Result[,c("gene_name", "p-value", "p.valor_EGFvscontrol", "probeset_id")]
ResultFin<-ResultFin[order(ResultFin$p-value),]
ResultFin<-ResultFin[complete.cases(ResultFin),]
head(ResultFin)

for(i in 1:10){
y11<-as.numeric(EGF[ rownames(EGF)==ResultFin$probeset_id[i], ])
x11<-EGF.time
y22<-as.numeric(BControl[ rownames(BControl)==ResultFin$probeset_id[i], ])
x22<-BControl.time

x1<-approx(x11, y11, xout = unique(x11), method = "constant")$x
y1<-approx(x11, y11, xout = unique(x11), method = "constant")$y

x2<-approx(x22, y22, xout = unique(x22), method = "constant")$x
y2<-approx(x22, y22, xout = unique(x22), method = "constant")$y
## Plot
png(filename = paste0("C:/Users/Marco Albrecht/Desktop/Pup_Master_MA_V3/method
comparison/MaSigPro_pval_Rank_",as.character(i),".png"),width = 3.25, height = 3.25,units= "in",res = 1200, pointsize = 6)
plot(x1, y1, ylim=c(min(c(y1,y2))-(0.1*(max(c(y1,y2))-min(c(y1,y2))))),max(c(y1,y2),na.rm = TRUE)),type="l",
col="red",lwd=2,ylab="Intensity", xlab=" time [h]", xaxt="n")
points(x11,y11,col="red")
lines(x2, y2,col="blue",lwd=2)
points(x22,y22 ,col="blue",pch=4)
axis(side=1, at=round(unique(x1,y1)))
title(main = list(paste0("MaSigPro result rank ",as.character(i),": ",ResultFin$gene_name[i]), cex = 1.2))
legend("bottom",groups=c("EGF", "Control"), pch=c(15,15),col=c("red","blue"),ncol=2,bty = "n")
dev.off()
}
write.table(ResultFin, "C:/Users/Marco Albrecht/Desktop/Pup_Master_MA_V3/method comparison/RESULT_MaSigPro_pval.txt",
sep="\t")

rm(ResultFin)

#####
#####
### Data merging
#####
#####

EDGEdata <- read.table("C:/Users/Marco Albrecht/Desktop/Pup_Master_MA_V3/method comparison/RESULT_EDGE.txt", header=TRUE)
EDGEdata <- EDGEdata[order(EDGEdata$pvalues),]
EDGEdata[,5]<-1:length(EDGEdata$pvalues)
colnames(EDGEdata) <- c("gene_name", "EDGE_pvalues", "EDGE_qvalues", "probeset_id", "EDGE_rank")

Limmadata <- read.table("C:/Users/Marco Albrecht/Desktop/Pup_Master_MA_V3/method comparison/RESULT_Limma.txt",
header=TRUE)
Limmadata <- Limmadata[order(Limmadata$P.Value),]
Limmadata[,5]<-1:length(Limmadata$P.Value)
colnames(Limmadata) <- c("gene_name", "Limma_pvalues", "Limma_qvalues", "probeset_id", "Limma_rank")

MaSigProdata <- read.table("C:/Users/Marco Albrecht/Desktop/Pup_Master_MA_V3/method
comparison/RESULT_MaSigPro_EGFvsCon.txt", header=TRUE)
MaSigProdata <- MaSigProdata[order(MaSigProdata$p.valor_EGFvscontrol),]
MaSigProdata[,5]<-1:length(MaSigProdata$p.valor_EGFvscontrol)
colnames(MaSigProdata) <- c("gene_name", "MaSigPro_pvalues", "MaSigPro_pvalues_EGFvscontrol", "probeset_id", "MaSigPro_rank")

TTCAdata <- read.table("C:/Users/Marco Albrecht/Desktop/Pup_Master_MA_V3/method comparison/RESULT_EGF-vs-
BControl_Pval.tsv", header=TRUE, sep="\t")
TTCAdata <- TTCAdata[,c("gene_name", "ConsensusScore", "Pval_ConsensusScore", "PubMed", "probeset_id")]
TTCAdata[,6] <- 1:length(TTCAdata$Pval_ConsensusScore)
colnames(TTCAdata) <- c("gene_name", "TTCAdata_ConsensusScore", "TTCAdata_Pval_ConsensusScore", "PubMed", "probeset_id", "TTCAdata_rank")

```

```
M1<-merge(EDGEdata,Limmadata, by = "probeset_id" , all = TRUE)
M2<-merge(MaSigProdata,TTCAdata, by = "probeset_id" , all = TRUE)
Result<-merge(M1,M2, by = "probeset_id" , all = TRUE)

Result <- Result[order(-Result$PubMed),]
head(Result)

write.table(Result, "C:/Users/Marco Albrecht/Desktop/Pup_Master_MA_V3/method comparison/RESULT_AllMethods.tsv", sep="\t")
```
